# Supplementary material for: Metabarcoding by capture using a single COI probe (MCSP) to identify and quantify fish species in ichthyoplankton swarms
Source: PLoS One. 2018 Sep 12;13(9):e0202976. doi: 10.1371/journal.pone.0202976 (PMC6135497; doi:10.1371/journal.pone.0202976)
Supplement: S1 Table — (XLSX) [file pone.0202976.s003.xlsx]

## Sheet: Feuil1
	Genetic Distance between COI probe and COI barcode of 444 Amazonnian fish species.
	Probe	Genetic.distance	specie	ORDER	PA	AN	TI	AM		threshold 0,266 for Danio probe :		84.6847													sp	Probe-COI_DANIO	Probe-O_niger_134	Probe-P_pinirampu_62	Probe-P_punctifer_70	Probe-PIMELODELLAsp_51	Min-Silure
58	Siluriform-probes	0.221518	Basilichthys_semotilus	ATHERINIFORMES	x									CV											Cyprinus_carpio_gi|670608906|	0.178412	0.210058	0.236792	0.198034	0.232616	0.198034
282	Siluriform-probes	0.228022	Odontesthes_bonariensis	ATHERINIFORMES						danio sur siluriformes	mean	0.238735		0.0758409											Hypophthalmichthys_molitrix_g	0.181742	0.236711	0.241288	0.227641	0.22091	0.22091
433	Siluriform-probes	0.2575	Thalassophryne_amazonica	BATRACHOIDIFORMES				x		danio sur siluriformes	SE	0.0181059													Carassius_auratus_gi|67060886	0.192093	0.251591	0.247333	0.249459	0.234701	0.234701
230	Siluriform-probes	0.181355	Laemolyta_taeniata	CHARACIFORMES				x		sonde silure sur siluriformes	mean	0.167397		0.303508											Nannostomus_eques_gi|11084914	0.195088	0.242299	0.22347	0.217297	0.209145	0.209145
90	Siluriform-probes	0.18141	Caenotropus_mestomorgmatos	CHARACIFORMES				x		sonde silure sur siluriformes	SE	0.0508065													Brachyplatystoma_rousseauxii	0.204363	0.188173	0.160546	0.0964559	0.173312	0.0964559
344	Siluriform-probes	0.183238	Potamorhina_altamazonica	CHARACIFORMES				x																	Planiloricaria_cryptodon_gi|1	0.204363	0.248713	0.203335	0.195716	0.193823	0.193823
345	Siluriform-probes	0.183238	Potamorhina_latior	CHARACIFORMES				x		danio	mean	0.246391		0.109808											Pterygoplichthys_ambrosettii	0.204948	0.245998	0.200964	0.208954	0.208954	0.200964
318	Siluriform-probes	0.186299	Piaractus_brachypomus	CHARACIFORMES				x		danio	SE	0.0270558													Thoracocharax_stellatus_gi|97	0.205101	0.27036	0.22347	0.229694	0.221407	0.221407
228	Siluriform-probes	0.187184	Laemolyta_garmani	CHARACIFORMES				x		sonde silure	mean	0.20618		0.225129											Caenotropus_mestomorgmatos_gi	0.205952	0.220648	0.21642	0.205952	0.18141	0.18141
187	Siluriform-probes	0.188081	Hemiodus_microlepis	CHARACIFORMES						sonde silure	SE	0.046417													Roeboides_descalvadensis_gi|3	0.207101	0.238159	0.231767	0.221233	0.229648	0.221233
229	Siluriform-probes	0.189137	Laemolyta_proxima	CHARACIFORMES				x																	Trachelyopterus_striatulus_gi	0.20712	0.217297	0.193101	0.185206	0.183246	0.183246
271	Siluriform-probes	0.190514	Myloplus_rubripinnis	CHARACIFORMES								Oretega et Sarmiento 453 amazonian fish species													Roeboides_myersii_Roeboides_m	0.20777	0.225433	0.230557	0.227991	0.225433	0.225433
26	Siluriform-probes	0.191482	Anodus_elongatus	CHARACIFORMES				x																	Hypophthalmus_marginatus_gi|1	0.208224	0.169642	0.149773	0.113244	0.182566	0.113244
226	Siluriform-probes	0.191935	Knodus_orteguasae	CHARACIFORMES				x																	Pterygoplichthys_anisitsi_gi|	0.208224	0.247109	0.208224	0.212446	0.212446	0.208224
431	Siluriform-probes	0.191935	Tetragonopterus_argenteus	CHARACIFORMES				x																	Trachelyopterus_galeatus_gi|1	0.208224	0.212969	0.18443	0.188173	0.180706	0.180706
432	Siluriform-probes	0.191935	Tetragonopterus_chalceus	CHARACIFORMES				x																	Pterygoplichthys_pardalis_gi|	0.208601	0.244701	0.214846	0.210677	0.214846	0.210677
404	Siluriform-probes	0.195246	Semaprochilodus_insignis	CHARACIFORMES				x																	Hypostomus_plecostomus_gi|339	0.208954	0.241791	0.204948	0.204948	0.208954	0.204948
179	Siluriform-probes	0.195912	Hemibrycon_huambonicus	CHARACIFORMES				x																	Pterygoplichthys_disjunctivus	0.210058	0.247333	0.210058	0.210058	0.214109	0.210058
444	Siluriform-probes	0.196248	Triportheus_angulatus	CHARACIFORMES				x																	Charax_stenopterus_gi|9737426	0.210122	0.259816	0.248729	0.237804	0.235638	0.235638
260	Siluriform-probes	0.19708	Metynnis_hypsauchen	CHARACIFORMES				x																	Goeldiella_eques_gi|105077248	0.210162	0.193823	0.182566	0.188173	0.1339	0.1339
243	Siluriform-probes	0.197771	Leporinus_striatus	CHARACIFORMES				x																	Rhamdia_quelen_gi|1050772490|	0.210162	0.203335	0.177	0.169642	0.123501	0.123501
402	Siluriform-probes	0.198399	Schizodon_borellii	CHARACIFORMES																					Tetragonopterus_chalceus_gi|3	0.210162	0.216857	0.197613	0.191935	0.197613	0.191935
240	Siluriform-probes	0.198859	Leporinus_friderici	CHARACIFORMES				x																	Loricaria_cataphracta_gi|8077	0.210332	0.240487	0.236104	0.204025	0.212446	0.204025
351	Siluriform-probes	0.198859	Prochilodus_lineatus	CHARACIFORMES																					Pterygoplichthys_gibbiceps_gi	0.211174	0.248682	0.20712	0.205101	0.215251	0.205101
76	Siluriform-probes	0.199277	Bryconamericus_diaphanus	CHARACIFORMES				x																	Serrapinnus_piaba_gi|30019919	0.211174	0.252968	0.203088	0.20712	0.211174	0.203088
132	Siluriform-probes	0.199741	Curimatella_dorsalis	CHARACIFORMES				x																	Aguarunichthys_torosus_gi|105	0.212105	0.193823	0.15874	0.135647	0.164171	0.135647
227	Siluriform-probes	0.200903	Knodus_smithi	CHARACIFORMES				x																	Brachyplatystoma_capapretum_g	0.212105	0.195716	0.156938	0.0981179	0.180706	0.0981179
78	Siluriform-probes	0.200964	Bryconamericus_iheringii	CHARACIFORMES																					Brachyplatystoma_filamentosum	0.212105	0.186299	0.15514	0.0997837	0.173312	0.0997837
407	Siluriform-probes	0.201423	Serrapinnus_notomelas	CHARACIFORMES				x																	Brachyplatystoma_tigrinum_gi|	0.212105	0.188173	0.15874	0.120067	0.186299	0.120067
1	Siluriform-probes	0.201934	Abramites_hypselonotus	CHARACIFORMES				x																	Hypophthalmus_edentatus_gi|10	0.212105	0.169642	0.149773	0.116648	0.180706	0.116648
235	Siluriform-probes	0.20254	Leporellus_vittatus	CHARACIFORMES				x																	Rhytiodus_argenteofuscus_gi|5	0.212993	0.247457	0.236516	0.210891	0.223594	0.210891
237	Siluriform-probes	0.20254	Leporinus_bleheri	CHARACIFORMES																					Hemigrammus_ocellifer_gi|1108	0.21321	0.294952	0.244421	0.250822	0.25512	0.244421
412	Siluriform-probes	0.202799	Serrasalmus_spilopleura	CHARACIFORMES				x																	Cetopsis_coecutiens_gi|105077	0.214053	0.180706	0.17885	0.153347	0.191935	0.153347
403	Siluriform-probes	0.203088	Schizodon_fasciatus	CHARACIFORMES				x																	Hypostomus_cochliodon_gi|2926	0.214651	0.256805	0.204505	0.206451	0.224191	0.204505
408	Siluriform-probes	0.203088	Serrapinnus_piaba	CHARACIFORMES				x																	Hoplosternum_littorale_gi|169	0.21468	0.294421	0.263805	0.245567	0.268434	0.245567
446	Siluriform-probes	0.203088	Triportheus_nematurus	CHARACIFORMES																					Probe-PIMELODELLAsp_51	0.216006	0.205252	0.169642	0.173312	NA	0.169642
225	Siluriform-probes	0.203106	Knodus_moenkhausii	CHARACIFORMES																					Pseudopimelodus_bufonius_gi|1	0.216006	0.197613	0.203335	0.160546	0.180706	0.160546
7	Siluriform-probes	0.203412	Acrobrycon_ipanquianus	CHARACIFORMES				x																	Chrysobrycon_myersi_gi|614463	0.216081	0.260831	0.218641	0.239439	0.252737	0.218641
181	Siluriform-probes	0.203412	Hemibrycon_jelskii	CHARACIFORMES				x																	Panaque_sp._gi|169798333|gb|E	0.217373	0.222967	0.224967	0.222967	0.216999	0.216999
27	Siluriform-probes	0.204619	Anostomus_ternetzi	CHARACIFORMES																					Zungaro_jahu_gi|163883691|gb|	0.217964	0.2091	0.201423	0.142677	0.195716	0.142677
239	Siluriform-probes	0.204619	Leporinus_fasciatus	CHARACIFORMES				x																	Cyphocharax_platanus_gi|97374	0.218017	0.228724	0.237401	0.218017	0.207461	0.207461
388	Siluriform-probes	0.204619	Rhytiodus_microlepis	CHARACIFORMES				x																	Loricariichthys_platymetopon	0.219349	0.252968	0.20712	0.189143	0.229694	0.189143
177	Siluriform-probes	0.204764	Hemibrycon_beni	CHARACIFORMES																					Cetopsis_candiru_gi|237688413	0.219645	0.185609	0.183697	0.157427	0.197184	0.157427
272	Siluriform-probes	0.205002	Mylossoma_aureum	CHARACIFORMES				x																	Knodus_orteguasae_gi|10279253	0.219928	0.205252	0.191935	0.205252	0.205252	0.191935
409	Siluriform-probes	0.205101	Serrasalmus_maculatus	CHARACIFORMES				x																	Otocinclus_vittatus_gi|169798	0.220303	0.227055	0.225078	0.229036	0.19985	0.19985
410	Siluriform-probes	0.205101	Serrasalmus_marginatus	CHARACIFORMES																					Pseudostegophilus_nemurus_gi|	0.22034	0.261328	0.261328	0.22455	0.22034	0.22034
376	Siluriform-probes	0.205153	Pygocentrus_nattereri	CHARACIFORMES				x																	Hyphessobrycon_anisitsi_gi|26	0.2211	0.241791	0.241791	0.231374	0.237606	0.231374
353	Siluriform-probes	0.205281	Psectrogaster_amazonica	CHARACIFORMES				x																	Laemolyta_taeniata_gi|9147037	0.2211	0.219062	0.181355	0.187184	0.191096	0.181355
242	Siluriform-probes	0.20712	Leporinus_obtusidens	CHARACIFORMES																					Knodus_smithi_gi|614463501|gb	0.221209	0.266276	0.200903	0.231572	0.239439	0.200903
138	Siluriform-probes	0.207461	Cyphocharax_platanus	CHARACIFORMES																					Astyanax_festae_gi|1127776207	0.221374	0.225678	0.236547	0.221374	0.212839	0.212839
134	Siluriform-probes	0.207522	Curimatopsis_macrolepis	CHARACIFORMES				x																	Corydoras_panda_gi|1108491201	0.221407	0.259443	0.203088	0.22347	0.238074	0.203088
445	Siluriform-probes	0.20777	Triportheus_elongatus	CHARACIFORMES				x																	Rhytiodus_microlepis_gi|55783	0.221462	0.247457	0.234347	0.204619	0.219336	0.204619
411	Siluriform-probes	0.207848	Serrasalmus_rhombeus	CHARACIFORMES				x																	Gymnotus_pantanal_gi|95915754	0.221491	0.250682	0.233863	0.227651	0.240126	0.227651
352	Siluriform-probes	0.208224	Prochilodus_nigricans	CHARACIFORMES				x																	Hypostomus_carinatus_gi|80778	0.221677	0.256406	0.210449	0.226216	0.219418	0.210449
418	Siluriform-probes	0.208424	Steindachnerina_brevipinna	CHARACIFORMES																					Loricariichthys_maculatus_gi|	0.221896	0.207173	0.205252	0.175153	0.207173	0.175153
75	Siluriform-probes	0.208454	Bryconamericus_caucanus	CHARACIFORMES				x																	Leporinus_striatus_gi|1111689	0.223107	0.223107	0.218825	0.197771	0.210332	0.197771
224	Siluriform-probes	0.208454	Knodus_megalops	CHARACIFORMES				x																	Gymnotus_carapo_gi|300198694|	0.22347	0.259443	0.246549	0.225539	0.242299	0.225539
383	Siluriform-probes	0.208454	Rhinobrycon_negrensis	CHARACIFORMES				x																	Schizodon_borellii_gi|5578368	0.223594	0.240874	0.219336	0.198399	0.219336	0.198399
193	Siluriform-probes	0.209145	Hoplias_malabaricus	CHARACIFORMES				x																	Astyanax_bimaculatus_gi|11277	0.22387	0.23461	0.244657	0.236608	0.238612	0.23461
275	Siluriform-probes	0.209145	Nannostomus_eques	CHARACIFORMES				x																	Brachyplatystoma_vaillantii_g	0.22387	0.197613	0.160546	0.0981179	0.171475	0.0981179
49	Siluriform-probes	0.209739	Astyanax_eigenmanniorum	CHARACIFORMES																					Farlowella_oxyrryncha_gi|1050	0.22387	0.220766	0.199515	0.177	0.201423	0.177
222	Siluriform-probes	0.209807	Knodus_heteresthes	CHARACIFORMES																					Farlowella_smithi_gi|10507725	0.22387	0.218809	0.197613	0.175153	0.199515	0.175153
387	Siluriform-probes	0.210891	Rhytiodus_argenteofuscus	CHARACIFORMES				x																	Knodus_heteresthes_gi|1027925	0.22387	0.225463	0.219554	0.209807	0.21369	0.209807
136	Siluriform-probes	0.210964	Cynopotamus_argenteus	CHARACIFORMES																					Peckoltia_vittata_gi|16979837	0.22387	0.224695	0.222728	0.2091	0.214911	0.2091
83	Siluriform-probes	0.210987	Bryconamericus_thomasi	CHARACIFORMES				x																	Tetragonopterus_argenteus_gi|	0.22387	0.218809	0.207173	0.191935	0.191935	0.191935
178	Siluriform-probes	0.210987	Hemibrycon_helleri	CHARACIFORMES				x																	Myleus_schomburgkii_Myleus_sc	0.225433	0.243522	0.246142	0.230557	0.227991	0.227991
114	Siluriform-probes	0.211032	Colossoma_macropomum	CHARACIFORMES				x																	Harttia_sp._gi|300198970|gb|H	0.225539	0.244421	0.217297	0.203088	0.22347	0.203088
310	Siluriform-probes	0.211174	Parodon_hilarii	CHARACIFORMES																					Moenkhausia_sanctaefilomenae	0.225539	0.257278	0.263791	0.23597	0.240183	0.23597
221	Siluriform-probes	0.212147	Knodus_breviceps	CHARACIFORMES																					Mylossoma_duriventre_gi|30256	0.225697	0.222895	0.22491	0.222895	0.218882	0.218882
89	Siluriform-probes	0.212215	Caenotropus_labyrinthicus	CHARACIFORMES				x																	Otocinclus_cocama_gi|16979832	0.225849	0.240622	0.240622	0.23461	0.214911	0.214911
241	Siluriform-probes	0.212215	Leporinus_macrocephalus	CHARACIFORMES																					Platynematichthys_notatus_gi|	0.225849	0.197613	0.16599	0.135647	0.188173	0.135647
236	Siluriform-probes	0.212774	Leporinus_agassizi	CHARACIFORMES				x																	Pseudopimelodus_mangurus_gi|1	0.225849	0.203335	0.197613	0.177	0.191935	0.177
51	Siluriform-probes	0.212839	Astyanax_festae	CHARACIFORMES	x																				Pseudoplatystoma_tigrinum_gi|	0.225849	0.15874	0.153347	0.0222238	0.171475	0.0222238
238	Siluriform-probes	0.212993	Leporinus_desmotes	CHARACIFORMES																					Serrapinnus_notomelas_gi|3021	0.225849	0.240622	0.201423	0.205252	0.214911	0.201423
405	Siluriform-probes	0.213078	Serrapinnus_calliurus	CHARACIFORMES																					Trachydoras_paraguayensis_gi|	0.226162	0.131412	0.221585	0.181605	0.20802	0.131412
382	Siluriform-probes	0.21321	Rhaphiodon_vulpinus	CHARACIFORMES				x																	Astyanax_asuncionensis_gi|973	0.226251	0.239036	0.263055	0.243346	0.249858	0.239036
174	Siluriform-probes	0.214983	Hasemania_sp.	CHARACIFORMES																					Bryconamericus_brevirostris_g	0.226373	0.234185	0.250059	0.236808	0.226373	0.226373
102	Siluriform-probes	0.215002	Chalceus_macrolepidotus	CHARACIFORMES				x																	Bryconamericus_thomasi_gi|614	0.226373	0.24473	0.210987	0.239439	0.250059	0.210987
82	Siluriform-probes	0.215251	Bryconamericus_stramineus	CHARACIFORMES				x																	Amblydoras_affinis_gi|4827674	0.226522	0.192618	0.205153	0.196773	0.205153	0.192618
153	Siluriform-probes	0.215251	Galeocharax_humeralis	CHARACIFORMES																					Acaronia_nassa_gi|33090405|gb	0.226756	0.265253	0.237253	0.230937	0.216404	0.216404
180	Siluriform-probes	0.216081	Hemibrycon_jabonero	CHARACIFORMES				x																	Laetacara_thayeri_gi|20847971	0.226756	0.287527	0.258698	0.235142	0.247899	0.235142
449	Siluriform-probes	0.216081	Xenurobrycon_polyancistrus	CHARACIFORMES				x																	Bryconamericus_diaphanus_gi|1	0.227014	0.228616	0.199277	0.206989	0.20893	0.199277
355	Siluriform-probes	0.217216	Pseudanos_trimaculatus	CHARACIFORMES				x																	Odontostilbe_pequira_gi|97374	0.227036	0.264297	0.222772	0.24434	0.231325	0.222772
406	Siluriform-probes	0.217297	Serrapinnus_kriegi	CHARACIFORMES																					Gobiomorus_maculatus_gi|11146	0.227079	0.220742	0.224961	0.233472	0.218641	0.218641
21	Siluriform-probes	0.217453	Ammocryptocharax_elegans	CHARACIFORMES																					Bunocephalus_coracoideus_gi|1	0.227496	0.233902	0.244701	0.219039	0.223256	0.219039
133	Siluriform-probes	0.217812	Curimatella_meyeri	CHARACIFORMES				x																	Brycon_hilarii_gi|295081056|g	0.227613	0.246549	0.272563	0.23597	0.248682	0.23597
28	Siluriform-probes	0.217894	Apareiodon_affinis	CHARACIFORMES																					Galeocharax_humeralis_gi|9737	0.227613	0.276987	0.215251	0.217297	0.221407	0.215251
192	Siluriform-probes	0.218193	Hoplerythrinus_unitaeniatus	CHARACIFORMES				x																	Luciopimelodus_pati_gi|973742	0.227613	0.248682	0.110518	0.158211	0.187172	0.110518
319	Siluriform-probes	0.218193	Piaractus_mesopotamicus	CHARACIFORMES																					Paracheirodon_innesi_gi|11084	0.227613	0.257278	0.219349	0.227613	0.23178	0.219349
77	Siluriform-probes	0.218641	Bryconamericus_exodon	CHARACIFORMES																					Pellona_flavipinnis_gi|973742	0.227613	0.23597	0.238074	0.217297	0.227613	0.217297
108	Siluriform-probes	0.218641	Chrysobrycon_myersi	CHARACIFORMES				x																	Schizodon_fasciatus_gi|239619	0.227613	0.23597	0.219349	0.203088	0.217297	0.203088
125	Siluriform-probes	0.218641	Creagrutus_changae	CHARACIFORMES				x																	Piaractus_brachypomus_gi|3308	0.227833	0.186299	0.193823	0.203335	0.203335	0.186299
127	Siluriform-probes	0.218641	Creagrutus_pila	CHARACIFORMES				x																	Sorubim_elongatus_gi|10507724	0.227833	0.188173	0.15514	0.113244	0.17885	0.113244
273	Siluriform-probes	0.218882	Mylossoma_duriventre	CHARACIFORMES				x																	Leporinus_bleheri_gi|55783672	0.227877	0.223594	0.206704	0.204619	0.20254	0.20254
307	Siluriform-probes	0.219349	Paracheirodon_innesi	CHARACIFORMES				x																	Satanoperca_pappaterra_gi|359	0.227951	0.264287	0.244606	0.255476	0.227536	0.227536
137	Siluriform-probes	0.22034	Cyphocharax_festivus	CHARACIFORMES				x																	Curimatella_meyeri_Curimatell	0.227991	0.243522	0.235716	0.243522	0.217812	0.217812
81	Siluriform-probes	0.221209	Bryconamericus_rubropictus	CHARACIFORMES																					Leporinus_agassizi_Leporinus	0.227991	0.256715	0.238309	0.235716	0.212774	0.212774
394	Siluriform-probes	0.221233	Roeboides_descalvadensis	CHARACIFORMES																					Oreochromis_mossambicus_gi|67	0.228464	0.253729	0.230537	0.216143	0.212081	0.212081
184	Siluriform-probes	0.221407	Hemigrammus_marginatus	CHARACIFORMES				x																	Leporinus_friderici_gi|164458	0.228693	0.233053	0.200952	0.198859	0.207263	0.198859
435	Siluriform-probes	0.221407	Thoracocharax_stellatus	CHARACIFORMES				x																	Astyanax_eigenmanniorum_gi|11	0.228755	0.228755	0.226618	0.209739	0.241705	0.209739
283	Siluriform-probes	0.222772	Odontostilbe_pequira	CHARACIFORMES																					Rhamphichthys_lineatus_gi|966	0.228956	0.212902	0.239167	0.212902	0.237114	0.212902
244	Siluriform-probes	0.223107	Leporinus_trifasciatus	CHARACIFORMES				x																	Rhinobrycon_negrensis_gi|6144	0.228968	0.252737	0.208454	0.234185	0.239439	0.208454
96	Siluriform-probes	0.223786	Ceratobranchia_obtusirostris	CHARACIFORMES				x																	Laemolyta_garmani_gi|91470372	0.229308	0.21298	0.187184	0.200964	0.195027	0.187184
276	Siluriform-probes	0.223786	Nantis_indefessus	CHARACIFORMES																					Pimelodella_gracilis_gi|97374	0.229528	0.2057	0.172338	0.164224	0.102293	0.102293
448	Siluriform-probes	0.223786	Xenurobrycon_heterodon	CHARACIFORMES				x																	Andinoacara_rivulatus_gi|1108	0.229694	0.274772	0.250822	0.250822	0.238074	0.238074
395	Siluriform-probes	0.225433	Roeboides_myersii	CHARACIFORMES				x																	Bryconamericus_stramineus_gi|	0.229694	0.246549	0.215251	0.229694	0.252968	0.215251
74	Siluriform-probes	0.226373	Bryconamericus_brevirostris	CHARACIFORMES	x																				Characidium_zebra_gi|30019891	0.229694	0.25512	0.240183	0.233872	0.259443	0.233872
4	Siluriform-probes	0.227613	Acestrorhynchus_lacustris	CHARACIFORMES				x																	Leporinus_obtusidens_gi|97374	0.229694	0.244421	0.20712	0.22347	0.221407	0.20712
270	Siluriform-probes	0.227991	Myleus_schomburgkii	CHARACIFORMES				x																	Poecilia_velifera_gi|67060925	0.229694	0.281438	0.25512	0.25512	0.290421	0.25512
124	Siluriform-probes	0.228968	Creagrutus_beni	CHARACIFORMES				x																	Basilichthys_semotilus_gi|223	0.229822	0.245504	0.235417	0.233415	0.221518	0.221518
126	Siluriform-probes	0.228968	Creagrutus_occidaneus	CHARACIFORMES				x																	Brachyplatystoma_juruense_gi|	0.229822	0.186299	0.160546	0.101453	0.191935	0.101453
97	Siluriform-probes	0.229866	Ceratobranchia_sp.	CHARACIFORMES																					Phractocephalus_hemioliopterus	0.229822	0.175153	0.160546	0.132157	0.16599	0.132157
200	Siluriform-probes	0.230027	Hyphessobrycon_megalopterus	CHARACIFORMES																					Sorubim_lima_gi|1050772478|gb	0.229822	0.191935	0.164171	0.104803	0.18443	0.104803
196	Siluriform-probes	0.231374	Hyphessobrycon_anisitsi	CHARACIFORMES																					Leptodoras_myersi_gi|48276758	0.230007	0.15961	0.214963	0.189856	0.212839	0.15961
223	Siluriform-probes	0.231572	Knodus_hypopterus	CHARACIFORMES				x																	Knodus_moenkhausii_gi|1027925	0.230163	0.245628	0.212017	0.203106	0.206065	0.203106
284	Siluriform-probes	0.231774	Oligosarcus_jenynsii	CHARACIFORMES																					Parastegophilus_maculatus_gi|	0.230308	0.237253	0.258481	0.205382	0.221148	0.205382
149	Siluriform-probes	0.233064	Erythrinus_erythrinus	CHARACIFORMES				x																	Potamorhina_altamazonica_Pota	0.230557	0.220344	0.254057	0.248771	0.183238	0.183238
106	Siluriform-probes	0.233478	Chilodus_fritillus	CHARACIFORMES				x																	Psectrogaster_amazonica_Psect	0.230557	0.235716	0.25141	0.275584	0.205281	0.205281
103	Siluriform-probes	0.233872	Characidium_zebra	CHARACIFORMES																					Cichla_monoculus_gi|103549556	0.230613	0.240681	0.266456	0.228118	0.228118	0.228118
53	Siluriform-probes	0.234185	Attonitus_ephimeros	CHARACIFORMES				x																	Chilodus_punctatus_gi|1644583	0.231325	0.275618	0.242155	0.255362	0.248729	0.242155
79	Siluriform-probes	0.234185	Bryconamericus_pachacuti	CHARACIFORMES				x																	Aphyocharax_anisitsi_gi|30817	0.231335	0.264043	0.261818	0.252981	0.246422	0.246422
123	Siluriform-probes	0.234185	Creagrutus_barrigai	CHARACIFORMES				x																	Bryconamericus_rubropictus_gi	0.231572	0.24739	0.221209	0.226373	0.24473	0.221209
73	Siluriform-probes	0.234404	Brycon_melanopterus	CHARACIFORMES				x																	Bryconops_caudomaculatus_gi|6	0.231572	0.24739	0.250059	0.260831	0.252737	0.24739
48	Siluriform-probes	0.23461	Astyanax_bimaculatus	CHARACIFORMES				x																	Knodus_megalops_gi|614463451|	0.231572	0.255426	0.208454	0.234185	0.221209	0.208454
46	Siluriform-probes	0.235048	Astyanax_anterior	CHARACIFORMES																					Nantis_indefessus_gi|61446357	0.231572	0.250059	0.226373	0.223786	0.24208	0.223786
104	Siluriform-probes	0.235638	Charax_stenopterus	CHARACIFORMES																					Distocyclus_conirostris_gi|95	0.231786	0.242225	0.227651	0.248559	0.229716	0.227651
195	Siluriform-probes	0.235716	Hydrolycus_scomberoides	CHARACIFORMES				x																	Brachyplatystoma_platynemum_g	0.231817	0.173312	0.15874	0.106484	0.182566	0.106484
72	Siluriform-probes	0.23597	Brycon_hilarii	CHARACIFORMES				x																	Platysilurus_mucosus_gi|10507	0.231817	0.226668	0.182566	0.1339	0.175153	0.1339
199	Siluriform-probes	0.23597	Hyphessobrycon_herbertaxelrodi	CHARACIFORMES																					Zungaro_zungaro_gi|1050772482	0.231817	0.190052	0.175153	0.101453	0.197613	0.101453
267	Siluriform-probes	0.23597	Moenkhausia_sanctaefilomenae	CHARACIFORMES																					Liosomadoras_oncinus_gi|48276	0.232181	0.21072	0.217094	0.212839	0.223523	0.21072
377	Siluriform-probes	0.23597	Pyrrhulina_australis	CHARACIFORMES				x																	Pseudanos_trimaculatus_gi|557	0.232184	0.258561	0.225733	0.217216	0.223594	0.217216
105	Siluriform-probes	0.236367	Charax_tectifer	CHARACIFORMES				x																	Bryconamericus_iheringii_gi|2	0.233446	0.231374	0.2211	0.200964	0.239696	0.200964
354	Siluriform-probes	0.236608	Psellogrammus_kennedyi	CHARACIFORMES																					Pimelodus_maculatus_gi|300198	0.233478	0.189502	0.14604	0.13084	0.183425	0.13084
186	Siluriform-probes	0.237253	Hemigrammus_pulcher	CHARACIFORMES				x																	Farlowella_nattereri_gi|10507	0.233817	0.226668	0.216857	0.199515	0.211032	0.199515
50	Siluriform-probes	0.237804	Astyanax_fasciatus	CHARACIFORMES				x																	Pimelodus_blochii_gi|10507724	0.233817	0.169642	0.144445	0.116648	0.177	0.116648
71	Siluriform-probes	0.238309	Brycon_cephalus	CHARACIFORMES				x																	Probe-P_punctifer_70	0.233817	0.156938	0.146217	NA	0.173312	0.146217
47	Siluriform-probes	0.239036	Astyanax_asuncionensis	CHARACIFORMES																					Pseudopimelodus_pulcher_gi|16	0.233817	0.191935	0.190052	0.160546	0.177	0.160546
80	Siluriform-probes	0.239439	Bryconamericus_peruanus	CHARACIFORMES	x																				Pseudoplatystoma_punctifer_gi	0.233817	0.156938	0.146217	0	0.173312	0
5	Siluriform-probes	0.241534	Acestrorhynchus_pantaneiro	CHARACIFORMES																					Pseudorinelepis_genibarbis_gi	0.233817	0.23461	0.193823	0.197613	0.211032	0.193823
107	Siluriform-probes	0.242155	Chilodus_punctatus	CHARACIFORMES				x																	Hypostomus_boulengeri_gi|1697	0.233863	0.250229	0.210964	0.208954	0.225192	0.208954
84	Siluriform-probes	0.242299	Bryconops_affinis	CHARACIFORMES																					Agamyxis_pectinifrons_gi|1108	0.233872	0.141357	0.199077	0.179339	0.19708	0.141357
161	Siluriform-probes	0.242299	Gymnocorymbus_ternetzi	CHARACIFORMES				x																	Bunocephalus_verrucosus_gi|17	0.233933	0.212286	0.205912	0.199592	0.208031	0.199592
45	Siluriform-probes	0.24434	Astyanax_abramis	CHARACIFORMES				x																	Mesonauta_festivus_gi|2084797	0.234011	0.27712	0.264895	0.255256	0.248107	0.248107
185	Siluriform-probes	0.244421	Hemigrammus_ocellifer	CHARACIFORMES				x																	Tahuantinsuyoa_macantzatza_gi	0.234011	0.272206	0.274659	0.262473	0.272206	0.262473
447	Siluriform-probes	0.24473	Tyttocharax_tambopatensis	CHARACIFORMES				x																	Bryconamericus_exodon_gi|6144	0.234185	0.24739	0.226373	0.218641	0.228968	0.218641
29	Siluriform-probes	0.244891	Apareiodon_sp.	CHARACIFORMES																					Tyttocharax_tambopatensis_gi|	0.234185	0.27176	0.252737	0.24473	0.24473	0.24473
197	Siluriform-probes	0.245861	Hyphessobrycon_eques	CHARACIFORMES				x																	Ageneiosus_inermis_gi|2376884	0.234281	0.179422	0.200964	0.177494	0.179422	0.177494
30	Siluriform-probes	0.246422	Aphyocharax_anisitsi	CHARACIFORMES																					Ammocryptocharax_elegans_gi|7	0.23432	0.247224	0.217453	0.232191	0.273716	0.217453
54	Siluriform-probes	0.24739	Attonitus_irisae	CHARACIFORMES				x																	Corydoras_elegans_gi|11084911	0.234347	0.240874	0.225733	0.217216	0.254099	0.217216
85	Siluriform-probes	0.24739	Bryconops_caudomaculatus	CHARACIFORMES				x																	Agamyxis_albomaculatus_gi|482	0.234361	0.147845	0.200216	0.187802	0.198132	0.147845
266	Siluriform-probes	0.247948	Moenkhausia_oligolepis	CHARACIFORMES				x																	Ixinandria_steinbachi_gi|1697	0.234624	0.228224	0.214417	0.198942	0.208576	0.198942
198	Siluriform-probes	0.248111	Hyphessobrycon_erythrostigma	CHARACIFORMES				x																	Lasiancistrus_schomburgkii_gi	0.234837	0.239298	0.239298	0.219429	0.212921	0.212921
220	Siluriform-probes	0.248141	Jupiaba_acanthogaster	CHARACIFORMES																					Bujurquina_vittata_gi|7599426	0.234931	0.290245	0.256092	0.251338	0.268112	0.251338
434	Siluriform-probes	0.248682	Thayeria_boehlkei	CHARACIFORMES				x																	Arapaima_gigas_gi|237688427|g	0.235123	0.259707	0.232201	0.228057	0.259707	0.228057
386	Siluriform-probes	0.252684	Rhoadsia_altipinna	CHARACIFORMES	x																				Anodus_elongatus_gi|102120554	0.235161	0.203587	0.217961	0.191482	0.213826	0.191482
31	Siluriform-probes	0.253289	Aphyocharax_dentatus	CHARACIFORMES																					Pterodoras_granulosus_gi|9737	0.235264	0.13408	0.230856	0.207062	0.194394	0.13408
265	Siluriform-probes	0.25343	Moenkhausia_intermedia	CHARACIFORMES																					Laemolyta_proxima_gi|91470373	0.235523	0.217029	0.19898	0.202954	0.189137	0.189137
396	Siluriform-probes	0.263303	Salminus_affinis	CHARACIFORMES				x																	Caenotropus_labyrinthicus_gi|	0.235638	0.229177	0.220648	0.242155	0.212215	0.212215
398	Siluriform-probes	0.272179	Salminus_hilarii	CHARACIFORMES				x																	Otocinclus_hoppei_gi|67305947	0.235687	0.235687	0.253854	0.251231	0.230576	0.230576
397	Siluriform-probes	0.276657	Salminus_brasiliensis	CHARACIFORMES				x																	Colossoma_macropomum_gi|33086	0.235822	0.214911	0.212969	0.226668	0.211032	0.211032
52	Siluriform-probes	0.27715	Astyanax_guaporensis	CHARACIFORMES																					Ancistrus_cirrhosus_gi|295081	0.23597	0.23597	0.221407	0.23178	0.250822	0.221407
314	Siluriform-probes	0.217297	Pellona_flavipinnis	CLUPEIFORMES				x																	Hoplias_malabaricus_gi|300198	0.23597	0.242299	0.23178	0.238074	0.209145	0.209145
313	Siluriform-probes	0.238309	Pellona_castelnaeana	CLUPEIFORMES																					Poecilia_reticulata_gi|670609	0.23597	0.285916	0.242299	0.263791	0.272563	0.242299
139	Siluriform-probes	0.198034	Cyprinus_carpio	CYPRINIFORMES																					Pseudoplatystoma_corruscans_g	0.23597	0.175453	0.162009	0.0474842	0.187172	0.0474842
203	Siluriform-probes	0.22091	Hypophthalmichthys_molitrix	CYPRINIFORMES																					Sorubimichthys_planiceps_gi|2	0.23597	0.177394	0.187172	0.106972	0.19708	0.106972
93	Siluriform-probes	0.234701	Carassius_auratus	CYPRINIFORMES																					Aphyocharax_dentatus_gi|35974	0.236455	0.273202	0.264287	0.253289	0.264287	0.253289
155	Siluriform-probes	0.219349	Gambusia_holbrooki	CYPRINODONTIFORMES																					Leporinus_desmotes_gi|5578367	0.236516	0.247457	0.219336	0.236516	0.212993	0.212993
154	Siluriform-probes	0.219541	Gambusia_affinis	CYPRINODONTIFORMES																					Acrobrycon_ipanquianus_gi|614	0.236808	0.250059	0.203412	0.250059	0.228968	0.203412
135	Siluriform-probes	0.233421	Cynolebias_sp.	CYPRINODONTIFORMES																					Creagrutus_beni_gi|614463297|	0.236808	0.255426	0.228968	0.24473	0.234185	0.228968
340	Siluriform-probes	0.242299	Poecilia_reticulata	CYPRINODONTIFORMES																					Creagrutus_changae_gi|6144633	0.236808	0.223786	0.236808	0.24208	0.218641	0.218641
451	Siluriform-probes	0.242299	Xiphophorus_maculatus	CYPRINODONTIFORMES																					Creagrutus_pila_gi|614463317|	0.236808	0.223786	0.236808	0.24208	0.218641	0.218641
450	Siluriform-probes	0.245213	Xiphophorus_hellerii	CYPRINODONTIFORMES																					Hemibrycon_huambonicus_gi|614	0.236808	0.231572	0.195912	0.216081	0.231572	0.195912
341	Siluriform-probes	0.25512	Poecilia_velifera	CYPRINODONTIFORMES																					Xenurobrycon_heterodon_gi|614	0.236808	0.223786	0.239439	0.228968	0.255426	0.223786
62	Siluriform-probes	0.203308	Brachyhypopomus_brevirostris	GYMNOTIFORMES				x																	Rineloricaria_parva_gi|973742	0.236993	0.23919	0.228265	0.213232	0.213232	0.213232
379	Siluriform-probes	0.212902	Rhamphichthys_lineatus	GYMNOTIFORMES				x																	Semaprochilodus_insignis_gi|3	0.237138	0.195246	0.230366	0.230366	0.232616	0.195246
61	Siluriform-probes	0.21489	Brachyhypopomus_bennetti	GYMNOTIFORMES																					Geophagus_steindachneri_gi|75	0.237253	0.260877	0.265692	0.268112	0.241919	0.241919
146	Siluriform-probes	0.215251	Eigenmannia_virescens	GYMNOTIFORMES				x																	Corydoras_sterbai_gi|66191984	0.237289	0.230924	0.241563	0.230924	0.239423	0.230924
168	Siluriform-probes	0.219449	Gymnotus_coropinae	GYMNOTIFORMES				x																	Astyanax_anterior_gi|11277770	0.237495	0.272504	0.235048	0.255625	0.241162	0.235048
167	Siluriform-probes	0.219838	Gymnotus_chaviro	GYMNOTIFORMES				x																	Dormitator_latifrons_gi|11146	0.237763	0.229204	0.224961	0.212373	0.218641	0.212373
380	Siluriform-probes	0.220886	Rhamphichthys_marmoratus	GYMNOTIFORMES				x																	Chilodus_fritillus_gi|5548938	0.237804	0.264297	0.237804	0.239977	0.233478	0.233478
263	Siluriform-probes	0.22491	Microsternarchus_bilineatus	GYMNOTIFORMES				x																	Curimatella_dorsalis_gi|55489	0.237804	0.229177	0.237804	0.235638	0.199741	0.199741
166	Siluriform-probes	0.225539	Gymnotus_carapo	GYMNOTIFORMES				x																	Hemisorubim_platyrhynchos_gi|	0.237833	0.216857	0.153347	0.135647	0.190052	0.135647
144	Siluriform-probes	0.225592	Eigenmannia_macrops	GYMNOTIFORMES				x																	Hoplerythrinus_unitaeniatus_g	0.237931	0.22036	0.267391	0.242388	0.218193	0.218193
169	Siluriform-probes	0.226618	Gymnotus_inaequilabiatus	GYMNOTIFORMES																					Serrasalmus_marginatus_gi|973	0.238074	0.21321	0.215251	0.205101	0.21321	0.205101
141	Siluriform-probes	0.227651	Distocyclus_conirostris	GYMNOTIFORMES				x																	Apistoloricaria_ommation_gi|1	0.238244	0.260314	0.22387	0.200522	0.237833	0.200522
171	Siluriform-probes	0.227651	Gymnotus_pantanal	GYMNOTIFORMES																					Pellona_castelnaeana_Pellona	0.238309	0.256715	0.275584	0.240911	0.238309	0.238309
172	Siluriform-probes	0.231655	Gymnotus_tigre	GYMNOTIFORMES				x																	Potamorhina_latior_Potamorhin	0.238309	0.227991	0.259381	0.243522	0.183238	0.183238
416	Siluriform-probes	0.233024	Steatogenys_duidae	GYMNOTIFORMES				x																	Gambusia_affinis_gi|339769697	0.238597	0.280488	0.23432	0.219541	0.225839	0.219541
417	Siluriform-probes	0.233024	Steatogenys_elegans	GYMNOTIFORMES				x																	Rineloricaria_lanceolata_gi|8	0.23884	0.262652	0.23365	0.259968	0.210728	0.210728
145	Siluriform-probes	0.233872	Eigenmannia_trilineata	GYMNOTIFORMES																					Trachydoras_brevis_gi|4827677	0.23919	0.142282	0.228265	0.192267	0.226099	0.142282
206	Siluriform-probes	0.236367	Hypopomus_artedi	GYMNOTIFORMES				x																	Serrapinnus_calliurus_gi|3056	0.239244	0.254939	0.213078	0.226047	0.215224	0.213078
164	Siluriform-probes	0.237114	Gymnorhamphichthys_rondoni	GYMNOTIFORMES				x																	Cichlasoma_bimaculatum_gi|330	0.23937	0.260877	0.2522	0.247899	0.235142	0.235142
213	Siluriform-probes	0.237114	Hypopygus_neblinae	GYMNOTIFORMES																					Bryconamericus_pachacuti_gi|6	0.239439	0.266276	0.234185	0.258123	0.239439	0.234185
143	Siluriform-probes	0.237684	Eigenmannia_humboldtii	GYMNOTIFORMES				x																	Prochilodus_lineatus_gi|97374	0.239642	0.207263	0.228693	0.213628	0.198859	0.198859
381	Siluriform-probes	0.238032	Rhamphichthys_rostratus	GYMNOTIFORMES				x																	Chalceus_macrolepidotus_gi|33	0.239696	0.235523	0.223143	0.215002	0.2211	0.215002
63	Siluriform-probes	0.23884	Brachyhypopomus_pinnicaudatus	GYMNOTIFORMES				x																	Cynopotamus_argenteus_gi|2618	0.239696	0.248111	0.219062	0.210964	0.239696	0.210964
212	Siluriform-probes	0.239167	Hypopygus_lepturus	GYMNOTIFORMES				x																	Oreochromis_mossambicus_gi|90	0.239696	0.243892	0.231374	0.223143	0.219062	0.219062
170	Siluriform-probes	0.242225	Gymnotus_jonasi	GYMNOTIFORMES				x																	Curimatopsis_macrolepis_gi|10	0.239849	0.229036	0.207522	0.223107	0.211388	0.207522
60	Siluriform-probes	0.246442	Brachyhypopomus_beebei	GYMNOTIFORMES				x																	Henonemus_punctatus_gi|163883	0.239849	0.240622	0.244657	0.224695	0.212969	0.212969
423	Siluriform-probes	0.249502	Sternarchorhamphus_muelleri	GYMNOTIFORMES				x																	Oxydoras_niger_gi|1050772492|	0.239849	0	0.216857	0.156938	0.205252	0
426	Siluriform-probes	0.249502	Sternarchorhynchus_oxyrhynchus	GYMNOTIFORMES				x																	Probe-O_niger_134	0.239849	NA	0.216857	0.156938	0.205252	0.156938
8	Siluriform-probes	0.252354	Adontosternarchus_balaenops	GYMNOTIFORMES				x																	Knodus_breviceps_gi|102792550	0.239862	0.23304	0.216279	0.220435	0.212147	0.212147
115	Siluriform-probes	0.252354	Compsaraia_samueli	GYMNOTIFORMES				x																	Astronotus_ocellatus_gi|11084	0.240183	0.263791	0.265974	0.244421	0.248682	0.244421
290	Siluriform-probes	0.252354	Orthosternarchus_tamandua	GYMNOTIFORMES				x																	Pyrrhulina_australis_gi|97374	0.240183	0.265974	0.246549	0.259443	0.23597	0.23597
427	Siluriform-probes	0.252354	Sternopygus_macrurus	GYMNOTIFORMES				x																	Odontesthes_bonariensis_gi|29	0.240619	0.244865	0.244865	0.232197	0.228022	0.228022
165	Siluriform-probes	0.253701	Gymnorhamphichthys_rosamariae	GYMNOTIFORMES				x																	Cichla_piquiti_gi|1035495579|	0.240681	0.22563	0.250885	0.22068	0.228118	0.22068
10	Siluriform-probes	0.255217	Adontosternarchus_nebulosus	GYMNOTIFORMES				x																	Hasemania_sp._gi|359742370|gb	0.240744	0.214983	0.240302	0.238159	0.227536	0.214983
343	Siluriform-probes	0.255217	Porotergus_gymnotus	GYMNOTIFORMES																					Tilapia_rendalli_gi|359743088	0.240744	0.238159	0.248935	0.242451	0.229648	0.229648
37	Siluriform-probes	0.255587	Apteronotus_albifrons	GYMNOTIFORMES				x																	Anostomus_ternetzi_gi|5578367	0.240874	0.249665	0.223594	0.204619	0.251879	0.204619
163	Siluriform-probes	0.257905	Gymnorhamphichthys_hypostomus	GYMNOTIFORMES				x																	Nemadoras_elongatus_gi|482767	0.24094	0.157637	0.223523	0.187802	0.191917	0.157637
425	Siluriform-probes	0.25809	Sternarchorhynchus_mormyrus	GYMNOTIFORMES				x																	Pterobunocephalus_depressus_g	0.241361	0.248338	0.253026	0.25538	0.216321	0.216321
11	Siluriform-probes	0.259235	Adontosternarchus_sachsi	GYMNOTIFORMES				x																	Trachydoras_steindachneri_gi|	0.241395	0.150059	0.232616	0.18609	0.230437	0.150059
39	Siluriform-probes	0.259235	Apteronotus_leptorhynchus	GYMNOTIFORMES				x																	Jupiaba_acanthogaster_gi|4696	0.241633	0.268009	0.274751	0.250323	0.248141	0.248141
9	Siluriform-probes	0.260975	Adontosternarchus_clarkae	GYMNOTIFORMES				x																	Serrasalmus_rhombeus_gi|95915	0.241633	0.216153	0.218244	0.211989	0.207848	0.207848
38	Siluriform-probes	0.260975	Apteronotus_bonapartii	GYMNOTIFORMES				x																	Calophysus_macropterus_gi|105	0.241871	0.2091	0.109857	0.156938	0.190052	0.109857
420	Siluriform-probes	0.260975	Sternarchogiton_nattereri	GYMNOTIFORMES				x																	Corydoras_rabauti_Corydoras_r	0.241871	0.240622	0.205252	0.199515	0.232616	0.199515
424	Siluriform-probes	0.263548	Sternarchorhynchus_hagedornae	GYMNOTIFORMES				x																	Leiarius_marmoratus_gi|105077	0.241871	0.188173	0.186299	0.135647	0.17885	0.135647
342	Siluriform-probes	0.263871	Porotergus_gimbeli	GYMNOTIFORMES				x																	Pimelodina_flavipinnis_gi|105	0.241871	0.169642	0.111549	0.123501	0.156938	0.111549
419	Siluriform-probes	0.265715	Sternarchella_terminalis	GYMNOTIFORMES				x																	Astyanax_abramis_gi|112777626	0.242155	0.24434	0.253144	0.253144	0.250934	0.24434
308	Siluriform-probes	0.269696	Parapteronotus_hasemani	GYMNOTIFORMES				x																	Leporinus_macrocephalus_gi|16	0.242155	0.24434	0.224901	0.212215	0.21642	0.212215
147	Siluriform-probes	0.27172	Electrophorus_electricus	GYMNOTIFORMES				x																	Astronotus_crassipinnis_gi|29	0.242299	0.261614	0.265974	0.250822	0.246549	0.246549
339	Siluriform-probes	0.272626	Platyurosternarchus_macrostomus	GYMNOTIFORMES				x																	Corydoras_paleatus_gi|1108491	0.242299	0.229694	0.203088	0.21321	0.238074	0.203088
421	Siluriform-probes	0.272626	Sternarchogiton_porcinum	GYMNOTIFORMES				x																	Metynnis_hypsauchen_gi|110849	0.242299	0.240183	0.211174	0.19708	0.217297	0.19708
422	Siluriform-probes	0.28446	Sternarchogiton_preto	GYMNOTIFORMES				x																	Pseudoplatystoma_fasciatum_gi	0.242299	0.163915	0.15632	0.0015353	0.18129	0.0015353
268	Siluriform-probes	0.217297	Mugil_cephalus	MUGILIFORMES	x																				Xiphophorus_maculatus_gi|6706	0.242299	0.288165	0.272563	0.242299	0.257278	0.242299
269	Siluriform-probes	0.249135	Mugil_curema	MUGILIFORMES	x																				Charax_tectifer_gi|959157377|	0.242661	0.290503	0.244771	0.236367	0.257555	0.236367
40	Siluriform-probes	0.228057	Arapaima_gigas	OSTEOGLOSSIFORMES				x																	Gymnotus_chaviro_gi|959157554	0.242661	0.268378	0.240557	0.219838	0.230126	0.219838
294	Siluriform-probes	0.244067	Osteoglossum_bicirrhosum	OSTEOGLOSSIFORMES				x																	Serrapinnus_kriegi_gi|3010376	0.242739	0.257278	0.233872	0.221407	0.217297	0.217297
287	Siluriform-probes	0.212081	Oreochromis_mossambicus	PERCIFORMES																					Leporellus_vittatus_gi|557836	0.243062	0.245256	0.210891	0.20254	0.223594	0.20254
142	Siluriform-probes	0.212373	Dormitator_latifrons	PERCIFORMES	x																				Nannoptopoma_spectabile_gi|29	0.243211	0.208757	0.216626	0.214651	0.214651	0.208757
3	Siluriform-probes	0.216404	Acaronia_nassa	PERCIFORMES				x																	Steatogenys_duidae_gi|9666394	0.243291	0.233024	0.237114	0.235066	0.243291	0.233024
304	Siluriform-probes	0.216527	Pachypops_fourcroi	PERCIFORMES				x																	Cichlasoma_dimerus_gi|3936613	0.243518	0.256812	0.224008	0.232616	0.2283	0.224008
159	Siluriform-probes	0.218641	Gobiomorus_maculatus	PERCIFORMES	x																				Leptodoras_acipenserinus_gi|4	0.243605	0.165859	0.221786	0.184042	0.217497	0.165859
288	Siluriform-probes	0.219062	Oreochromis_mossambicus	PERCIFORMES																					Leptodoras_cataniai_gi|482767	0.243605	0.161878	0.226099	0.184042	0.213232	0.161878
148	Siluriform-probes	0.220146	Eleotris_picta	PERCIFORMES	x																				Ceratobranchia_sp._gi|6144632	0.243717	0.266425	0.229866	0.24933	0.243717	0.229866
110	Siluriform-probes	0.22068	Cichla_piquiti	PERCIFORMES																					Pinirampus_pirinampu_gi|10507	0.243898	0.216857	0	0.146217	0.169642	0
331	Siluriform-probes	0.222289	Plagioscion_squamosissimus	PERCIFORMES				x																	Platystomatichthys_sturio_gi|	0.243898	0.218809	0.186299	0.139154	0.190052	0.139154
112	Siluriform-probes	0.224008	Cichlasoma_dimerus	PERCIFORMES																					Probe-P_pinirampu_62	0.243898	0.216857	NA	0.146217	0.169642	0.146217
330	Siluriform-probes	0.225994	Plagioscion_auratus	PERCIFORMES				x																	Sturisoma_nigrirostrum_gi|105	0.243898	0.220766	0.207173	0.169642	0.201423	0.169642
401	Siluriform-probes	0.227536	Satanoperca_pappaterra	PERCIFORMES																					Mylossoma_aureum_gi|910750036	0.244153	0.218882	0.205002	0.212902	0.226931	0.205002
109	Siluriform-probes	0.228118	Cichla_monoculus	PERCIFORMES				x																	Oxyropsis_wrightiana_gi|29260	0.244241	0.225248	0.213127	0.221186	0.221186	0.213127
289	Siluriform-probes	0.228661	Oreochromis_urolepis	PERCIFORMES																					Microglanis_parahybae_gi|8210	0.244248	0.199277	0.201318	0.179169	0.151893	0.151893
436	Siluriform-probes	0.229648	Tilapia_rendalli	PERCIFORMES																					Prochilodus_nigricans_gi|2376	0.244248	0.210296	0.222848	0.220742	0.208224	0.208224
158	Siluriform-probes	0.229694	Gerres_cinereus	PERCIFORMES	x																				Bryconops_affinis_gi|30019888	0.244421	0.272563	0.242299	0.244421	0.261614	0.242299
162	Siluriform-probes	0.229694	Gymnogeophagus_balzanii	PERCIFORMES																					Hemigrammus_marginatus_gi|313	0.244421	0.257278	0.221407	0.242299	0.23597	0.221407
305	Siluriform-probes	0.229694	Pachyurus_bonariensis	PERCIFORMES																					Pimelodella_lateristriga_gi|2	0.244421	0.215251	0.193101	0.18129	0.108743	0.108743
111	Siluriform-probes	0.235142	Cichlasoma_bimaculatum	PERCIFORMES																					Pimelodella_laticeps_gi|39366	0.244421	0.21321	0.193101	0.183246	0.0877623	0.0877623
231	Siluriform-probes	0.235142	Laetacara_thayeri	PERCIFORMES				x																	Serrasalmus_maculatus_gi|2950	0.244421	0.211174	0.221407	0.205101	0.211174	0.205101
190	Siluriform-probes	0.236049	Heros_efasciatus	PERCIFORMES				x																	Triportheus_nematurus_gi|9737	0.244421	0.248682	0.219349	0.23178	0.203088	0.203088
262	Siluriform-probes	0.237401	Microphilypnus_sp.	PERCIFORMES																					Oligosarcus_jenynsii_gi|97374	0.244513	0.250964	0.246657	0.231774	0.231774	0.231774
25	Siluriform-probes	0.238074	Andinoacara_rivulatus	PERCIFORMES	x																				Pimelodus_albicans_gi|9737427	0.244549	0.206223	0.147079	0.138998	0.184561	0.138998
157	Siluriform-probes	0.241919	Geophagus_steindachneri	PERCIFORMES				x																	Steindachnerina_brevipinna_gi	0.244549	0.237641	0.249189	0.244549	0.208424	0.208424
44	Siluriform-probes	0.244421	Astronotus_ocellatus	PERCIFORMES				x																	Triportheus_angulatus_gi|3021	0.244587	0.236311	0.208044	0.212017	0.196248	0.196248
43	Siluriform-probes	0.246549	Astronotus_crassipinnis	PERCIFORMES				x																	Attonitus_ephimeros_gi|614463	0.24473	0.24473	0.24739	0.234185	0.24739	0.234185
218	Siluriform-probes	0.246614	Hypselecara_temporalis	PERCIFORMES				x																	Ceratobranchia_obtusirostris	0.24473	0.260831	0.223786	0.239439	0.228968	0.223786
259	Siluriform-probes	0.248107	Mesonauta_festivus	PERCIFORMES				x																	Hemibrycon_jabonero_gi|614463	0.24473	0.258123	0.216081	0.252737	0.24208	0.216081
13	Siluriform-probes	0.250047	Aequidens_tetramerus	PERCIFORMES				x																	Apareiodon_sp._gi|959315941|g	0.244891	0.267506	0.270062	0.252354	0.244891	0.244891
86	Siluriform-probes	0.251338	Bujurquina_vittata	PERCIFORMES																					Leporinus_trifasciatus_gi|111	0.244895	0.247109	0.223107	0.229578	0.227415	0.223107
156	Siluriform-probes	0.253454	Geophagus_proximus	PERCIFORMES				x																	Salmo_trutta_gi|670609332|gb|	0.245213	0.236792	0.224334	0.220228	0.266689	0.220228
12	Siluriform-probes	0.258481	Aequidens_diadema	PERCIFORMES				x																	Acanthodoras_cataphractus_gi|	0.245358	0.147845	0.219231	0.219231	0.202305	0.147845
100	Siluriform-probes	0.258698	Chaetobranchus_flavescens	PERCIFORMES				x																	Rhamphichthys_marmoratus_gi|9	0.245362	0.226931	0.239167	0.220886	0.241226	0.220886
35	Siluriform-probes	0.261359	Apistogrammoides_pucallpaensis	PERCIFORMES				x																	Hypoclinemus_mentalis_gi|9747	0.245567	0.25463	0.225566	0.245567	0.236612	0.225566
101	Siluriform-probes	0.26231	Chaetobranchus_semifasciatus	PERCIFORMES				x																	Aequidens_tetramerus_gi|20847	0.245758	0.267451	0.258698	0.258698	0.250047	0.250047
430	Siluriform-probes	0.262473	Tahuantinsuyoa_macantzatza	PERCIFORMES				x																	Hemigrammus_pulcher_gi|110849	0.245758	0.25436	0.2522	0.237253	0.263062	0.237253
191	Siluriform-probes	0.266315	Heros_severus	PERCIFORMES																					Trachydoras_nattereri_gi|4827	0.245823	0.167858	0.219638	0.208992	0.221786	0.167858
41	Siluriform-probes	0.270539	Archocentrus_nigrofasciatus	PERCIFORMES				x																	Lamontichthys_filamentosus_gi	0.24593	0.207173	0.18443	0.180706	0.190052	0.180706
130	Siluriform-probes	0.27076	Crenicichla_vittata	PERCIFORMES																					Pachypops_fourcroi_gi|8080400	0.246102	0.23095	0.216527	0.226801	0.228872	0.216527
128	Siluriform-probes	0.271866	Crenicara_punctulatum	PERCIFORMES				x																	Brycon_cephalus_Brycon_cephal	0.246142	0.267439	0.256715	0.246142	0.238309	0.238309
34	Siluriform-probes	0.274894	Apistogramma_linkei	PERCIFORMES																					Serrasalmus_spilopleura_Serra	0.246142	0.217812	0.222884	0.215289	0.202799	0.202799
264	Siluriform-probes	0.282066	Mikrogeophagus_altispinosus	PERCIFORMES																					Osteoglossum_bicirrhosum_gi|1	0.246207	0.261359	0.244067	0.246207	0.259175	0.244067
33	Siluriform-probes	0.285916	Apistogramma_cacatuoides	PERCIFORMES				x																	Astrodoras_asterifrons_gi|807	0.246289	0.215762	0.220047	0.213628	0.209378	0.209378
129	Siluriform-probes	0.304099	Crenicichla_lepidota	PERCIFORMES																					Eigenmannia_virescens_gi|3001	0.246549	0.242299	0.221407	0.215251	0.219349	0.215251
32	Siluriform-probes	0.307922	Apistogramma_bitaeniata	PERCIFORMES				x																	Mugil_cephalus_gi|186966701|g	0.246549	0.240183	0.23178	0.217297	0.23597	0.217297
6	Siluriform-probes	0.212607	Achirus_achirus	PLEURONECTIFORMES				x																	Pimelodus_pictus_gi|110849153	0.246549	0.189143	0.158211	0.154433	0.187172	0.154433
201	Siluriform-probes	0.225566	Hypoclinemus_mentalis	PLEURONECTIFORMES				x																	Leptodoras_copei_gi|482767571	0.246757	0.170474	0.218307	0.197134	0.224777	0.170474
94	Siluriform-probes	0.231293	Catathyridium_jenynsii	PLEURONECTIFORMES																					Corydoras_nattereri_gi|102694	0.246886	0.230126	0.205667	0.225994	0.244771	0.205667
400	Siluriform-probes	0.214109	Salvelinus_fontinalis	SALMONIFORMES																					Plagioscion_auratus_gi|237688	0.246886	0.232201	0.228057	0.225994	0.240557	0.225994
399	Siluriform-probes	0.220228	Salmo_trutta	SALMONIFORMES																					Moenkhausia_intermedia_gi|755	0.246997	0.25343	0.277502	0.266465	0.273068	0.25343
285	Siluriform-probes	0.233872	Oncorhynchus_mykiss	SALMONIFORMES																					Abramites_hypselonotus_gi|111	0.247109	0.258279	0.201934	0.220963	0.223107	0.201934
362	Siluriform-probes	0.0015353	Pseudoplatystoma_fasciatum	SILURIFORMES																					Bryconamericus_peruanus_gi|61	0.24739	0.252737	0.269013	0.255426	0.239439	0.239439
300	Siluriform-probes	0.0394151	Oxydoras_kneri	SILURIFORMES																					Creagrutus_occidaneus_gi|6144	0.24739	0.239439	0.228968	0.252737	0.236808	0.228968
361	Siluriform-probes	0.0474842	Pseudoplatystoma_corruscans	SILURIFORMES																					Hemibrycon_jelskii_gi|6144634	0.24739	0.24208	0.203412	0.223786	0.234185	0.203412
322	Siluriform-probes	0.0877623	Pimelodella_laticeps	SILURIFORMES																					Brycon_melanopterus_gi|262233	0.247948	0.254813	0.254813	0.234404	0.238891	0.234404
67	Siluriform-probes	0.106484	Brachyplatystoma_platynemum	SILURIFORMES																					Physopyxis_lyra_gi|482767673|	0.248047	0.208992	0.236993	0.226099	0.230437	0.208992
256	Siluriform-probes	0.110518	Luciopimelodus_pati	SILURIFORMES																					Rhoadsia_altipinna_gi|9854753	0.248076	0.300395	0.264331	0.252684	0.252684	0.252684
334	Siluriform-probes	0.113127	Platydoras_costatus	SILURIFORMES																					Microphilypnus_sp._gi|1058204	0.24839	0.261793	0.237401	0.237401	0.246179	0.237401
335	Siluriform-probes	0.121301	Platydoras_hancockii	SILURIFORMES																					Eigenmannia_trilineata_gi|973	0.248682	0.246549	0.242299	0.23597	0.233872	0.233872
441	Siluriform-probes	0.131412	Trachydoras_paraguayensis	SILURIFORMES																					Gymnogeophagus_balzanii_gi|97	0.248682	0.27921	0.229694	0.23178	0.23597	0.229694
385	Siluriform-probes	0.137662	Rhinodoras_dorbignyi	SILURIFORMES																					Hemiodus_microlepis_Hemiodus	0.248771	0.235716	0.188081	0.217812	0.200326	0.188081
324	Siluriform-probes	0.138998	Pimelodus_albicans	SILURIFORMES																					Geophagus_proximus_gi|3330362	0.249065	0.278065	0.260086	0.260086	0.253454	0.253454
439	Siluriform-probes	0.142282	Trachydoras_brevis	SILURIFORMES																					Piaractus_mesopotamicus_gi|91	0.249125	0.218193	0.224715	0.237931	0.229094	0.218193
452	Siluriform-probes	0.142677	Zungaro_jahu	SILURIFORMES																					Microsternarchus_bilineatus_g	0.24952	0.268521	0.257905	0.22491	0.241226	0.22491
348	Siluriform-probes	0.146217	Probe-P_pinirampu_62	SILURIFORMES																					Hyphessobrycon_megalopterus_g	0.249665	0.234347	0.236516	0.230027	0.258561	0.230027
349	Siluriform-probes	0.146217	Probe-P_punctifer_70	SILURIFORMES																					Leptodoras_juruensis_gi|48276	0.249803	0.157637	0.236547	0.2044	0.21072	0.157637
261	Siluriform-probes	0.151893	Microglanis_parahybae	SILURIFORMES																					Nemadoras_trimaculatus_gi|482	0.249803	0.177611	0.243146	0.219231	0.221374	0.177611
293	Siluriform-probes	0.155668	Ossancora_punctata	SILURIFORMES																					Ossancora_asterophysa_gi|4827	0.249803	0.163573	0.245358	0.206501	0.202305	0.163573
347	Siluriform-probes	0.156938	Probe-O_niger_134	SILURIFORMES																					Pimelodus_ornatus_gi|10507724	0.250012	0.173312	0.171475	0.15514	0.207173	0.15514
250	Siluriform-probes	0.16049	Leptodoras_linnelli	SILURIFORMES																					Chaetobranchus_flavescens_gi|	0.250047	0.289791	0.258698	0.265253	0.260877	0.258698
291	Siluriform-probes	0.163573	Ossancora_asterophysa	SILURIFORMES																					Creagrutus_barrigai_gi|614463	0.250059	0.255426	0.234185	0.277285	0.252737	0.234185
292	Siluriform-probes	0.167557	Ossancora_fimbriata	SILURIFORMES																					Xenurobrycon_polyancistrus_gi	0.250059	0.234185	0.216081	0.218641	0.24739	0.216081
350	Siluriform-probes	0.169642	Probe-PIMELODELLAsp_51	SILURIFORMES																					Parotocinclus_sp._gi|29260183	0.250095	0.224853	0.220799	0.222823	0.226888	0.220799
359	Siluriform-probes	0.177	Pseudopimelodus_mangurus	SILURIFORMES																					Cynolebias_sp._gi|545912057|g	0.250142	0.279078	0.253831	0.233421	0.266348	0.233421
438	Siluriform-probes	0.183246	Trachelyopterus_striatulus	SILURIFORMES																					Apareiodon_affinis_gi|9737427	0.250483	0.250483	0.248107	0.217894	0.227061	0.217894
255	Siluriform-probes	0.189143	Loricariichthys_platymetopon	SILURIFORMES																					Otocinclus_vestitus_gi|292601	0.250674	0.235169	0.263844	0.24547	0.214983	0.214983
20	Siluriform-probes	0.192618	Amblydoras_affinis	SILURIFORMES																					Auchenipterus_nigripinnis_gi|	0.250822	0.211174	0.219349	0.19708	0.211174	0.19708
55	Siluriform-probes	0.196694	Auchenipterichthys_longimanus	SILURIFORMES																					Corydoras_aeneus_gi|110849118	0.250822	0.263791	0.205101	0.215251	0.219349	0.205101
56	Siluriform-probes	0.19708	Auchenipterus_nigripinnis	SILURIFORMES																					Gambusia_holbrooki_gi|6706089	0.250822	0.283674	0.23178	0.221407	0.219349	0.219349
219	Siluriform-probes	0.198942	Ixinandria_steinbachi	SILURIFORMES																					Hemibrycon_beni_gi|614463405|	0.251776	0.243733	0.204764	0.227902	0.233142	0.204764
57	Siluriform-probes	0.199077	Auchenipterus_osteomystax	SILURIFORMES																					Leporinus_fasciatus_gi|557836	0.251879	0.227877	0.212993	0.204619	0.215102	0.204619
371	Siluriform-probes	0.200964	Pterygoplichthys_ambrosettii	SILURIFORMES																					Achirus_achirus_gi|974707812|	0.251899	0.230963	0.212607	0.22071	0.228901	0.212607
357	Siluriform-probes	0.202305	Pseudobunocephalus_rugosus	SILURIFORMES																					Hypodoras_forficulatus_gi|482	0.252012	0.205557	0.237771	0.221491	0.198831	0.198831
119	Siluriform-probes	0.203088	Corydoras_paleatus	SILURIFORMES																					Nemadoras_humeralis_gi|482767	0.252035	0.165563	0.23874	0.193983	0.198132	0.165563
173	Siluriform-probes	0.203088	Harttia_sp.	SILURIFORMES																					Physopyxis_ananas_gi|48276767	0.252035	0.230007	0.232181	0.21072	0.227839	0.21072
217	Siluriform-probes	0.204948	Hypostomus_plecostomus	SILURIFORMES																					Rhinodoras_boehlkei_gi|482767	0.252035	0.151747	0.223523	0.193983	0.208607	0.151747
374	Siluriform-probes	0.205101	Pterygoplichthys_gibbiceps	SILURIFORMES																					Megalechis_thoracata_gi|29508	0.252354	0.271752	0.235523	0.233446	0.235523	0.233446
309	Siluriform-probes	0.205382	Parastegophilus_maculatus	SILURIFORMES																					Moenkhausia_oligolepis_gi|163	0.252518	0.266396	0.273433	0.247948	0.259425	0.247948
118	Siluriform-probes	0.205667	Corydoras_nattereri	SILURIFORMES																					Bryconamericus_caucanus_gi|61	0.252737	0.255426	0.208454	0.258123	0.255426	0.208454
372	Siluriform-probes	0.208224	Pterygoplichthys_anisitsi	SILURIFORMES																					Gymnotus_coropinae_gi|9591575	0.252811	0.263548	0.229716	0.225592	0.219449	0.219449
214	Siluriform-probes	0.208954	Hypostomus_boulengeri	SILURIFORMES																					Rhinodoras_dorbignyi_gi|97374	0.252968	0.137662	0.22347	0.187172	0.205101	0.137662
42	Siluriform-probes	0.209378	Astrodoras_asterifrons	SILURIFORMES																					Hypoptopoma_bilobatum_gi|1698	0.252981	0.243796	0.237326	0.218244	0.216153	0.216153
373	Siluriform-probes	0.210058	Pterygoplichthys_disjunctivus	SILURIFORMES																					Pygocentrus_nattereri_gi|9737	0.252995	0.213628	0.215762	0.205153	0.207263	0.205153
215	Siluriform-probes	0.210449	Hypostomus_carinatus	SILURIFORMES																					Hypselecara_temporalis_gi|759	0.253711	0.287753	0.256092	0.268112	0.246614	0.246614
375	Siluriform-probes	0.210677	Pterygoplichthys_pardalis	SILURIFORMES																					Otocinclus_mariae_gi|67305948	0.253854	0.253854	0.272472	0.27517	0.243419	0.243419
210	Siluriform-probes	0.212969	Hypoptopoma_inexspectatum	SILURIFORMES																					Triportheus_elongatus_Triport	0.254057	0.20777	0.227991	0.238309	0.246142	0.20777
390	Siluriform-probes	0.213232	Rineloricaria_parva	SILURIFORMES																					Batrochoglanis_raninus_gi|105	0.254116	0.205252	0.197613	0.17885	0.177	0.177
346	Siluriform-probes	0.216006	Probe-COI_DANIO	SILURIFORMES																					Hyphessobrycon_eques_gi|11084	0.254531	0.267728	0.245861	0.265512	0.252354	0.245861
367	Siluriform-probes	0.216321	Pterobunocephalus_depressus	SILURIFORMES																					Leptodoras_linnelli_gi|482767	0.25463	0.16049	0.232174	0.180871	0.21468	0.16049
306	Siluriform-probes	0.216999	Panaque_sp.	SILURIFORMES																					Eigenmannia_macrops_gi|959157	0.254946	0.240126	0.233863	0.233863	0.225592	0.225592
311	Siluriform-probes	0.220799	Parotocinclus_sp.	SILURIFORMES																					Knodus_hypopterus_gi|61446348	0.255426	0.236808	0.231572	0.24208	0.236808	0.231572
24	Siluriform-probes	0.221407	Ancistrus_cirrhosus	SILURIFORMES																					Oreochromis_urolepis_gi|20955	0.25543	0.250902	0.237478	0.233057	0.228661	0.228661
122	Siluriform-probes	0.230924	Corydoras_sterbai	SILURIFORMES																					Plagioscion_squamosissimus_gi	0.255654	0.229315	0.229315	0.222289	0.236407	0.222289
209	Siluriform-probes	0.235376	Hypoptopoma_incognitum	SILURIFORMES																					Heros_efasciatus_gi|333036291	0.255658	0.280342	0.264541	0.244701	0.236049	0.236049
245	Siluriform-probes	0.262327	Lepthoplosternum_pectorale	SILURIFORMES																					Steatogenys_elegans_gi|966639	0.2558	0.233024	0.243291	0.241226	0.243291	0.233024
301	Siluriform-probes	0	Oxydoras_niger	SILURIFORMES				x																	Aequidens_diadema_gi|29601226	0.256092	0.265692	0.270539	0.258481	0.265692	0.258481
329	Siluriform-probes	0	Pinirampus_pirinampu	SILURIFORMES				x																	Myloplus_rubripinnis_Myloplus	0.256715	0.235716	0.212774	0.212774	0.190514	0.190514
363	Siluriform-probes	0	Pseudoplatystoma_punctifer	SILURIFORMES				x																	Auchenipterichthys_longimanus	0.256812	0.207082	0.204993	0.196694	0.221871	0.196694
364	Siluriform-probes	0.0222238	Pseudoplatystoma_tigrinum	SILURIFORMES				x																	Cyphocharax_festivus_gi|95915	0.256906	0.22034	0.241633	0.245965	0.222442	0.22034
68	Siluriform-probes	0.0964559	Brachyplatystoma_rousseauxii	SILURIFORMES				x																	Nemadoras_hemipeltis_gi|48276	0.257209	0.161333	0.250421	0.213078	0.22387	0.161333
64	Siluriform-probes	0.0981179	Brachyplatystoma_capapretum	SILURIFORMES				x																	Colomesus_asellus_gi|52343027	0.257278	0.233872	0.23178	0.225539	0.248682	0.225539
70	Siluriform-probes	0.0981179	Brachyplatystoma_vaillantii	SILURIFORMES				x																	Amaralia_hypsiura_gi|11029348	0.257869	0.227496	0.223256	0.21694	0.210677	0.210677
65	Siluriform-probes	0.0997837	Brachyplatystoma_filamentosum	SILURIFORMES				x																	Attonitus_irisae_gi|614463155	0.258123	0.250059	0.250059	0.24739	0.24739	0.24739
66	Siluriform-probes	0.101453	Brachyplatystoma_juruense	SILURIFORMES				x																	Psellogrammus_kennedyi_gi|359	0.258242	0.261017	0.246682	0.236608	0.240622	0.236608
453	Siluriform-probes	0.101453	Zungaro_zungaro	SILURIFORMES				x																	Oxydoras_kneri_gi|973742829|g	0.258557	0.0394151	0.230797	0.176068	0.206223	0.0394151
320	Siluriform-probes	0.102293	Pimelodella_gracilis	SILURIFORMES				x																	Hassar_orestis_gi|482767549|g	0.25863	0.183568	0.249399	0.20704	0.240281	0.183568
414	Siluriform-probes	0.104803	Sorubim_lima	SILURIFORMES				x																	Dianema_longibarbis_gi|959157	0.259114	0.293031	0.252511	0.250323	0.263548	0.250323
415	Siluriform-probes	0.106972	Sorubimichthys_planiceps	SILURIFORMES				x																	Brachyhypopomus_brevirostris	0.259235	0.265715	0.240126	0.238032	0.203308	0.203308
321	Siluriform-probes	0.108743	Pimelodella_lateristriga	SILURIFORMES				x																	Parodon_hilarii_gi|300199094|	0.259443	0.242299	0.23178	0.211174	0.225539	0.211174
92	Siluriform-probes	0.109857	Calophysus_macropterus	SILURIFORMES				x																	Thayeria_boehlkei_gi|11084916	0.259443	0.261614	0.248682	0.259443	0.27036	0.248682
323	Siluriform-probes	0.111549	Pimelodina_flavipinnis	SILURIFORMES				x																	Salvelinus_fontinalis_gi|6706	0.260181	0.245213	0.216143	0.214109	0.251591	0.214109
205	Siluriform-probes	0.113244	Hypophthalmus_marginatus	SILURIFORMES				x																	Xiphophorus_hellerii_gi|67060	0.260181	0.284324	0.245213	0.247333	0.260181	0.245213
413	Siluriform-probes	0.113244	Sorubim_elongatus	SILURIFORMES				x																	Erythrinus_erythrinus_gi|9591	0.260444	0.272153	0.276889	0.260444	0.233064	0.233064
204	Siluriform-probes	0.116648	Hypophthalmus_edentatus	SILURIFORMES				x																	Hemibrycon_helleri_gi|6144634	0.260831	0.258123	0.210987	0.234185	0.250059	0.210987
325	Siluriform-probes	0.116648	Pimelodus_blochii	SILURIFORMES				x																	Opsodoras_morei_gi|482767641|	0.26103	0.15961	0.223523	0.17559	0.21072	0.15961
69	Siluriform-probes	0.120067	Brachyplatystoma_tigrinum	SILURIFORMES				x																	Ossancora_punctata_gi|4827676	0.26103	0.155668	0.221374	0.179638	0.191917	0.155668
333	Siluriform-probes	0.121494	Platydoras_armatulus	SILURIFORMES				x																	Pseudobunocephalus_rugosus_gi	0.26103	0.234361	0.221374	0.230007	0.202305	0.202305
378	Siluriform-probes	0.123501	Rhamdia_quelen	SILURIFORMES				x																	Gymnotus_jonasi_gi|959157532|	0.261389	0.270066	0.250682	0.242225	0.254946	0.242225
326	Siluriform-probes	0.13084	Pimelodus_maculatus	SILURIFORMES				x																	Rhamphichthys_rostratus_gi|95	0.261389	0.238032	0.252811	0.242225	0.246442	0.238032
315	Siluriform-probes	0.132157	Phractocephalus_hemioliopterus	SILURIFORMES				x																	Acestrorhynchus_lacustris_gi|	0.261614	0.261614	0.25512	0.227613	0.263791	0.227613
160	Siluriform-probes	0.1339	Goeldiella_eques	SILURIFORMES				x																	Mugil_curema_gi|203284865|gb|	0.262095	0.27086	0.25128	0.249135	0.262095	0.249135
337	Siluriform-probes	0.1339	Platysilurus_mucosus	SILURIFORMES				x																	Chaetobranchus_semifasciatus	0.26231	0.271272	0.26231	0.264541	0.266778	0.26231
368	Siluriform-probes	0.13408	Pterodoras_granulosus	SILURIFORMES				x																	Lepthoplosternum_pectorale_gi	0.262327	0.275622	0.27786	0.262327	0.264527	0.262327
18	Siluriform-probes	0.135647	Aguarunichthys_torosus	SILURIFORMES				x																	Hypoptopoma_steindachneri_gi|	0.262853	0.250012	0.254116	0.231817	0.227833	0.227833
188	Siluriform-probes	0.135647	Hemisorubim_platyrhynchos	SILURIFORMES				x																	Eigenmannia_humboldtii_gi|604	0.263548	0.263548	0.250505	0.241933	0.237684	0.237684
234	Siluriform-probes	0.135647	Leiarius_marmoratus	SILURIFORMES				x																	Gymnotus_tigre_gi|959157588|g	0.263548	0.271105	0.241325	0.231655	0.24866	0.231655
336	Siluriform-probes	0.135647	Platynematichthys_notatus	SILURIFORMES				x																	Auchenipterus_osteomystax_gi	0.263791	0.221407	0.219349	0.199077	0.211174	0.199077
338	Siluriform-probes	0.139154	Platystomatichthys_sturio	SILURIFORMES				x																	Gerres_cinereus_gi|297525364|	0.263791	0.25512	0.229694	0.252968	0.246549	0.229694
15	Siluriform-probes	0.141357	Agamyxis_pectinifrons	SILURIFORMES				x																	Anadoras_grypus_gi|482767501|	0.263801	0.198495	0.228265	0.208992	0.206881	0.198495
2	Siluriform-probes	0.147845	Acanthodoras_cataphractus	SILURIFORMES				x																	Hemidoras_morrisi_gi|48276755	0.263801	0.169862	0.230437	0.184042	0.208992	0.169862
14	Siluriform-probes	0.147845	Agamyxis_albomaculatus	SILURIFORMES				x																	Brachyhypopomus_bennetti_gi|9	0.264257	0.24952	0.241226	0.220886	0.21489	0.21489
442	Siluriform-probes	0.150059	Trachydoras_steindachneri	SILURIFORMES				x																	Gymnorhamphichthys_rondoni_gi	0.264257	0.237114	0.277123	0.260016	0.262134	0.237114
95	Siluriform-probes	0.15086	Centrodoras_brachiatus	SILURIFORMES				x																	Platydoras_armatulus_gi|89183	0.264297	0.121494	0.239977	0.208034	0.214315	0.121494
384	Siluriform-probes	0.151747	Rhinodoras_boehlkei	SILURIFORMES				x																	Hassar_affinis_gi|482767547|g	0.264817	0.190897	0.246757	0.197134	0.235687	0.190897
99	Siluriform-probes	0.153347	Cetopsis_coecutiens	SILURIFORMES				x																	Hyphessobrycon_erythrostigma	0.26523	0.269572	0.248111	0.252354	0.26523	0.248111
328	Siluriform-probes	0.154433	Pimelodus_pictus	SILURIFORMES				x																	Acestrorhynchus_pantaneiro_gi	0.265665	0.29342	0.254844	0.241534	0.262945	0.241534
327	Siluriform-probes	0.15514	Pimelodus_ornatus	SILURIFORMES				x																	Hyphessobrycon_herbertaxelrodi	0.265974	0.250822	0.248682	0.23597	0.248682	0.23597
98	Siluriform-probes	0.157427	Cetopsis_candiru	SILURIFORMES				x																	Oxyropsis_carinata_gi|2926018	0.265991	0.223199	0.24429	0.249656	0.249656	0.223199
249	Siluriform-probes	0.157637	Leptodoras_juruensis	SILURIFORMES				x																	Heros_severus_gi|1108491319|g	0.266315	0.287006	0.273149	0.270864	0.266315	0.266315
277	Siluriform-probes	0.157637	Nemadoras_elongatus	SILURIFORMES				x																	Hypopygus_lepturus_gi|9666394	0.266386	0.239167	0.262134	0.2558	0.241226	0.239167
251	Siluriform-probes	0.15961	Leptodoras_myersi	SILURIFORMES				x																	Hypoptopoma_gulare_gi|1697982	0.267034	0.243898	0.241871	0.233817	0.217964	0.217964
286	Siluriform-probes	0.15961	Opsodoras_morei	SILURIFORMES				x																	Catathyridium_jenynsii_gi|973	0.267391	0.233499	0.246873	0.231293	0.249125	0.231293
358	Siluriform-probes	0.160546	Pseudopimelodus_bufonius	SILURIFORMES				x																	Centrodoras_brachiatus_gi|482	0.267621	0.15086	0.242769	0.212286	0.216566	0.15086
360	Siluriform-probes	0.160546	Pseudopimelodus_pulcher	SILURIFORMES				x																	Salminus_affinis_gi|113138895	0.267728	0.301773	0.272179	0.276657	0.263303	0.263303
278	Siluriform-probes	0.161333	Nemadoras_hemipeltis	SILURIFORMES				x																	Ageneiosus_ucayalensis_gi|177	0.267849	0.2044	0.227839	0.200216	0.198132	0.198132
247	Siluriform-probes	0.161878	Leptodoras_cataniai	SILURIFORMES				x																	Pseudepapterus_hasemani_gi|48	0.267849	0.217094	0.217094	0.221374	0.200216	0.200216
258	Siluriform-probes	0.161878	Megalodoras_uranoscopus	SILURIFORMES				x																	Gymnocorymbus_ternetzi_gi|110	0.268164	0.257278	0.250822	0.242299	0.250822	0.242299
183	Siluriform-probes	0.163203	Hemidoras_stenopeltis	SILURIFORMES				x																	Oncorhynchus_mykiss_gi|670609	0.268164	0.248682	0.242299	0.233872	0.259443	0.233872
279	Siluriform-probes	0.165563	Nemadoras_humeralis	SILURIFORMES				x																	Synbranchus_marmoratus_gi|300	0.268164	0.276987	0.268164	0.238074	0.274772	0.238074
246	Siluriform-probes	0.165859	Leptodoras_acipenserinus	SILURIFORMES				x																	Callichthys_callichthys_gi|16	0.268659	0.232616	0.242636	0.2091	0.25484	0.2091
440	Siluriform-probes	0.167858	Trachydoras_nattereri	SILURIFORMES				x																	Hypoptopoma_inexspectatum_gi|	0.268659	0.242636	0.242636	0.238612	0.212969	0.212969
428	Siluriform-probes	0.169642	Sturisoma_nigrirostrum	SILURIFORMES				x																	Anadoras_weddellii_gi|4827675	0.270135	0.208607	0.214963	0.208607	0.202305	0.202305
182	Siluriform-probes	0.169862	Hemidoras_morrisi	SILURIFORMES				x																	Megalodoras_uranoscopus_gi|48	0.270656	0.161878	0.259266	0.211109	0.228265	0.161878
248	Siluriform-probes	0.170474	Leptodoras_copei	SILURIFORMES				x																	Hypopygus_neblinae_gi|9666394	0.270662	0.243291	0.237114	0.247438	0.243291	0.237114
152	Siluriform-probes	0.175153	Farlowella_smithi	SILURIFORMES				x																	Hypoptopoma_incognitum_gi|807	0.27076	0.24465	0.263548	0.239999	0.235376	0.235376
254	Siluriform-probes	0.175153	Loricariichthys_maculatus	SILURIFORMES				x																	Eleotris_picta_gi|1058204809|	0.270864	0.220146	0.23305	0.228724	0.250607	0.220146
59	Siluriform-probes	0.177	Batrochoglanis_raninus	SILURIFORMES				x																	Sternopygus_macrurus_gi|94285	0.272626	0.263871	0.28446	0.260975	0.252354	0.252354
151	Siluriform-probes	0.177	Farlowella_oxyrryncha	SILURIFORMES				x																	Gymnotus_inaequilabiatus_gi|9	0.27282	0.250464	0.241705	0.226618	0.250464	0.226618
16	Siluriform-probes	0.177494	Ageneiosus_inermis	SILURIFORMES				x																	Astyanax_fasciatus_gi|1127775	0.27334	0.264297	0.239977	0.248729	0.237804	0.237804
280	Siluriform-probes	0.177611	Nemadoras_trimaculatus	SILURIFORMES				x																	Salminus_brasiliensis_gi|1131	0.274415	0.287969	0.276657	0.294839	0.278906	0.276657
232	Siluriform-probes	0.180706	Lamontichthys_filamentosus	SILURIFORMES				x																	Ossancora_fimbriata_gi|482767	0.274729	0.167557	0.236547	0.181671	0.223523	0.167557
437	Siluriform-probes	0.180706	Trachelyopterus_galeatus	SILURIFORMES				x																	Rhaphiodon_vulpinus_gi|973742	0.274772	0.23178	0.25512	0.21321	0.250822	0.21321
176	Siluriform-probes	0.183568	Hassar_orestis	SILURIFORMES				x																	Gymnorhamphichthys_rosamariae	0.274964	0.257905	0.29463	0.266386	0.253701	0.253701
175	Siluriform-probes	0.190897	Hassar_affinis	SILURIFORMES				x																	Archocentrus_nigrofasciatus_g	0.275417	0.282794	0.272974	0.270539	0.280327	0.270539
332	Siluriform-probes	0.193823	Planiloricaria_cryptodon	SILURIFORMES				x																	Platydoras_costatus_gi|110849	0.276153	0.113127	0.250902	0.211332	0.217784	0.113127
365	Siluriform-probes	0.193823	Pseudorinelepis_genibarbis	SILURIFORMES				x																	Salminus_hilarii_gi|113138898	0.276657	0.297144	0.297144	0.292542	0.272179	0.272179
17	Siluriform-probes	0.198132	Ageneiosus_ucayalensis	SILURIFORMES				x																	Pachyurus_bonariensis_gi|9737	0.276987	0.244421	0.238074	0.229694	0.252968	0.229694
22	Siluriform-probes	0.198495	Anadoras_grypus	SILURIFORMES				x																	Platydoras_hancockii_gi|48276	0.277573	0.121301	0.245823	0.208992	0.213232	0.121301
202	Siluriform-probes	0.198831	Hypodoras_forficulatus	SILURIFORMES				x																	Gymnorhamphichthys_hypostomus	0.27929	0.257905	0.285826	0.266386	0.27281	0.257905
121	Siluriform-probes	0.199515	Corydoras_rabauti	SILURIFORMES				x																	Brachyhypopomus_pinnicaudatus	0.279506	0.264267	0.245116	0.23884	0.24933	0.23884
150	Siluriform-probes	0.199515	Farlowella_nattereri	SILURIFORMES				x																	Electrophorus_electricus_gi|9	0.279684	0.298604	0.274365	0.27172	0.27702	0.27172
88	Siluriform-probes	0.199592	Bunocephalus_verrucosus	SILURIFORMES				x																	Hemidoras_stenopeltis_gi|4827	0.28193	0.163203	0.244067	0.184212	0.22358	0.163203
299	Siluriform-probes	0.19985	Otocinclus_vittatus	SILURIFORMES				x																	Astyanax_guaporensis_gi|11277	0.283797	0.283797	0.281575	0.288261	0.27715	0.27715
356	Siluriform-probes	0.200216	Pseudepapterus_hasemani	SILURIFORMES				x																	Orthosternarchus_tamandua_gi|	0.287448	0.28446	0.296485	0.252354	0.252354	0.252354
36	Siluriform-probes	0.200522	Apistoloricaria_ommation	SILURIFORMES				x																	Crenicara_punctulatum_gi|2084	0.287527	0.305834	0.271866	0.292062	0.292062	0.271866
23	Siluriform-probes	0.202305	Anadoras_weddellii	SILURIFORMES				x																	Brachyhypopomus_beebei_gi|959	0.287726	0.281055	0.265715	0.246442	0.246442	0.246442
120	Siluriform-probes	0.203088	Corydoras_panda	SILURIFORMES				x																	Thalassophryne_amazonica_gi|1	0.294545	0.289813	0.268881	0.2575	0.264308	0.2575
253	Siluriform-probes	0.204025	Loricaria_cataphracta	SILURIFORMES				x																	Hydrolycus_scomberoides_Hydro	0.29494	0.243522	0.235716	0.235716	0.235716	0.235716
216	Siluriform-probes	0.204505	Hypostomus_cochliodon	SILURIFORMES				x																	Hypopomus_artedi_gi|558615190	0.295008	0.259707	0.249008	0.249008	0.236367	0.236367
116	Siluriform-probes	0.205101	Corydoras_aeneus	SILURIFORMES				x																	Mikrogeophagus_altispinosus_g	0.297104	0.287046	0.304738	0.282066	0.294577	0.282066
274	Siluriform-probes	0.208757	Nannoptopoma_spectabile	SILURIFORMES				x																	Sternarchella_terminalis_gi|9	0.303528	0.308105	0.287726	0.27664	0.265715	0.265715
317	Siluriform-probes	0.208992	Physopyxis_lyra	SILURIFORMES				x																	Sternarchorhamphus_muelleri_g	0.305631	0.299521	0.330581	0.263871	0.249502	0.249502
91	Siluriform-probes	0.2091	Callichthys_callichthys	SILURIFORMES				x																	Apteronotus_albifrons_gi|1108	0.309301	0.281963	0.277502	0.255587	0.273068	0.255587
312	Siluriform-probes	0.2091	Peckoltia_vittata	SILURIFORMES				x																	Sternarchorhynchus_oxyrhynchus	0.311791	0.28446	0.269696	0.249502	0.27852	0.249502
19	Siluriform-probes	0.210677	Amaralia_hypsiura	SILURIFORMES				x																	Apistogramma_cacatuoides_gi|1	0.313358	0.318031	0.290421	0.285916	0.294952	0.285916
252	Siluriform-probes	0.21072	Liosomadoras_oncinus	SILURIFORMES				x																	Crenicichla_lepidota_gi|30019	0.313358	0.322733	0.329842	0.313358	0.304099	0.304099
316	Siluriform-probes	0.21072	Physopyxis_ananas	SILURIFORMES				x																	Adontosternarchus_clarkae_gi|	0.318002	0.299521	0.30257	0.263871	0.260975	0.260975
389	Siluriform-probes	0.210728	Rineloricaria_lanceolata	SILURIFORMES				x																	Apteronotus_bonapartii_gi|942	0.318002	0.27852	0.28446	0.260975	0.269696	0.260975
233	Siluriform-probes	0.212921	Lasiancistrus_schomburgkii	SILURIFORMES				x																	Parapteronotus_hasemani_gi|94	0.318002	0.305631	0.29346	0.269696	0.28446	0.269696
189	Siluriform-probes	0.212969	Henonemus_punctatus	SILURIFORMES				x																	Porotergus_gimbeli_gi|9428578	0.318002	0.308705	0.266778	0.263871	0.275567	0.263871
303	Siluriform-probes	0.213127	Oxyropsis_wrightiana	SILURIFORMES				x																	Adontosternarchus_balaenops_g	0.324265	0.27852	0.311791	0.252354	0.269696	0.252354
295	Siluriform-probes	0.214911	Otocinclus_cocama	SILURIFORMES				x																	Compsaraia_samueli_gi|9428575	0.324265	0.290448	0.25809	0.25809	0.252354	0.252354
298	Siluriform-probes	0.214983	Otocinclus_vestitus	SILURIFORMES				x																	Sternarchogiton_nattereri_gi|	0.324265	0.296485	0.287448	0.260975	0.260975	0.260975
207	Siluriform-probes	0.216153	Hypoptopoma_bilobatum	SILURIFORMES				x																	Porotergus_gymnotus_gi|942857	0.327417	0.28446	0.290448	0.255217	0.269696	0.255217
117	Siluriform-probes	0.217216	Corydoras_elegans	SILURIFORMES				x																	Sternarchogiton_porcinum_gi|9	0.327417	0.29346	0.287448	0.275567	0.272626	0.272626
208	Siluriform-probes	0.217964	Hypoptopoma_gulare	SILURIFORMES				x																	Apistogrammoides_pucallpaensis	0.327612	0.285805	0.281301	0.261359	0.261359	0.261359
87	Siluriform-probes	0.219039	Bunocephalus_coracoideus	SILURIFORMES				x																	Crenicichla_vittata_gi|973742	0.329201	0.298244	0.30058	0.302924	0.27076	0.27076
366	Siluriform-probes	0.22034	Pseudostegophilus_nemurus	SILURIFORMES				x																	Sternarchogiton_preto_gi|9428	0.330581	0.30257	0.299521	0.29346	0.28446	0.28446
302	Siluriform-probes	0.223199	Oxyropsis_carinata	SILURIFORMES				x																	Adontosternarchus_sachsi_gi|9	0.331417	0.281055	0.322005	0.259235	0.270066	0.259235
211	Siluriform-probes	0.227833	Hypoptopoma_steindachneri	SILURIFORMES				x																	Apteronotus_leptorhynchus_gi|	0.331417	0.305813	0.303528	0.259235	0.272251	0.259235
296	Siluriform-probes	0.230576	Otocinclus_hoppei	SILURIFORMES				x																	Adontosternarchus_nebulosus_g	0.333759	0.27852	0.30257	0.255217	0.266778	0.255217
257	Siluriform-probes	0.233446	Megalechis_thoracata	SILURIFORMES				x																	Sternarchorhynchus_hagedornae	0.333788	0.292207	0.292207	0.27664	0.263548	0.263548
297	Siluriform-probes	0.243419	Otocinclus_mariae	SILURIFORMES				x																	Apistogramma_linkei_gi|106127	0.335754	0.281942	0.286677	0.274894	0.286677	0.274894
194	Siluriform-probes	0.245567	Hoplosternum_littorale	SILURIFORMES				x																	Platyurosternarchus_macrostomu	0.336951	0.30257	0.30257	0.27852	0.272626	0.272626
140	Siluriform-probes	0.250323	Dianema_longibarbis	SILURIFORMES				x																	Sternarchorhynchus_mormyrus_g	0.35639	0.27852	0.260975	0.25809	0.27852	0.25809
429	Siluriform-probes	0.238074	Synbranchus_marmoratus	SYNBRANCHIFORMES				x																	Apistogramma_bitaeniata_gi|75	0.366359	0.326026	0.323413	0.307922	0.320809	0.307922
113	Siluriform-probes	0.225539	Colomesus_asellus	TETRAODONTIFORMES				x																	Pterolebias_longipinnis_gi|41	1.1488	1.29258	1.20708	1.28134	1.36378	1.20708
511	Single-probe	0.229822	Basilichthys_semotilus	ATHERINIFORMES	x																				Rivulus_rectocaudatus_gi|4101	1.1488	1.36378	1.1488	1.30399	1.27027	1.1488
735	Single-probe	0.240619	Odontesthes_bonariensis	ATHERINIFORMES																					Rivulus_ophiomimus_gi|4101207	1.18714	1.24861	1.1582	1.23801	1.19704	1.1582
886	Single-probe	0.294545	Thalassophryne_amazonica	BATRACHOIDIFORMES				x																	Pterolebias_phasianus_gi|4101	1.21725	1.25936	1.21725	1.19704	1.24861	1.19704
728	Single-probe	0.195088	Nannostomus_eques	CHARACIFORMES				x																	Ctenopharyngodon_idella_gi|10	1.23988	1.30434	1.21387	1.21387	1.25774	1.21387
888	Single-probe	0.205101	Thoracocharax_stellatus	CHARACIFORMES				x																	Rivulus_rubrolineatus_gi|4101	1.24861	1.33929	1.11232	1.25936	1.18714	1.11232
543	Single-probe	0.205952	Caenotropus_mestomorgmatos	CHARACIFORMES				x																	Trigonectes_balzanii_gi|41012	1.25936	1.32734	1.23801	1.35143	1.32734	1.23801
847	Single-probe	0.207101	Roeboides_descalvadensis	CHARACIFORMES																					Neofundulus_paraguayensis_gi	1.35143	1.31557	1.30399	1.30399	1.35143	1.30399
848	Single-probe	0.20777	Roeboides_myersii	CHARACIFORMES				x																	Probe-COI_DANIO	NA	0.239849	0.243898	0.233817	0.216006	0.216006
557	Single-probe	0.210122	Charax_stenopterus	CHARACIFORMES
885	Single-probe	0.210162	Tetragonopterus_chalceus	CHARACIFORMES				x
861	Single-probe	0.211174	Serrapinnus_piaba	CHARACIFORMES				x
840	Single-probe	0.212993	Rhytiodus_argenteofuscus	CHARACIFORMES				x
638	Single-probe	0.21321	Hemigrammus_ocellifer	CHARACIFORMES				x
561	Single-probe	0.216081	Chrysobrycon_myersi	CHARACIFORMES				x
591	Single-probe	0.218017	Cyphocharax_platanus	CHARACIFORMES
679	Single-probe	0.219928	Knodus_orteguasae	CHARACIFORMES				x
649	Single-probe	0.2211	Hyphessobrycon_anisitsi	CHARACIFORMES
683	Single-probe	0.2211	Laemolyta_taeniata	CHARACIFORMES				x
680	Single-probe	0.221209	Knodus_smithi	CHARACIFORMES				x
504	Single-probe	0.221374	Astyanax_festae	CHARACIFORMES	x
841	Single-probe	0.221462	Rhytiodus_microlepis	CHARACIFORMES				x
696	Single-probe	0.223107	Leporinus_striatus	CHARACIFORMES				x
855	Single-probe	0.223594	Schizodon_borellii	CHARACIFORMES
501	Single-probe	0.22387	Astyanax_bimaculatus	CHARACIFORMES				x
675	Single-probe	0.22387	Knodus_heteresthes	CHARACIFORMES
884	Single-probe	0.22387	Tetragonopterus_argenteus	CHARACIFORMES				x
723	Single-probe	0.225433	Myleus_schomburgkii	CHARACIFORMES				x
720	Single-probe	0.225539	Moenkhausia_sanctaefilomenae	CHARACIFORMES
726	Single-probe	0.225697	Mylossoma_duriventre	CHARACIFORMES				x
860	Single-probe	0.225849	Serrapinnus_notomelas	CHARACIFORMES				x
500	Single-probe	0.226251	Astyanax_asuncionensis	CHARACIFORMES
527	Single-probe	0.226373	Bryconamericus_brevirostris	CHARACIFORMES	x
536	Single-probe	0.226373	Bryconamericus_thomasi	CHARACIFORMES				x
529	Single-probe	0.227014	Bryconamericus_diaphanus	CHARACIFORMES				x
736	Single-probe	0.227036	Odontostilbe_pequira	CHARACIFORMES
525	Single-probe	0.227613	Brycon_hilarii	CHARACIFORMES				x
606	Single-probe	0.227613	Galeocharax_humeralis	CHARACIFORMES
760	Single-probe	0.227613	Paracheirodon_innesi	CHARACIFORMES				x
856	Single-probe	0.227613	Schizodon_fasciatus	CHARACIFORMES				x
771	Single-probe	0.227833	Piaractus_brachypomus	CHARACIFORMES				x
690	Single-probe	0.227877	Leporinus_bleheri	CHARACIFORMES
586	Single-probe	0.227991	Curimatella_meyeri	CHARACIFORMES				x
689	Single-probe	0.227991	Leporinus_agassizi	CHARACIFORMES				x
693	Single-probe	0.228693	Leporinus_friderici	CHARACIFORMES				x
502	Single-probe	0.228755	Astyanax_eigenmanniorum	CHARACIFORMES
836	Single-probe	0.228968	Rhinobrycon_negrensis	CHARACIFORMES				x
681	Single-probe	0.229308	Laemolyta_garmani	CHARACIFORMES				x
535	Single-probe	0.229694	Bryconamericus_stramineus	CHARACIFORMES				x
556	Single-probe	0.229694	Characidium_zebra	CHARACIFORMES
695	Single-probe	0.229694	Leporinus_obtusidens	CHARACIFORMES
678	Single-probe	0.230163	Knodus_moenkhausii	CHARACIFORMES
797	Single-probe	0.230557	Potamorhina_altamazonica	CHARACIFORMES				x
806	Single-probe	0.230557	Psectrogaster_amazonica	CHARACIFORMES				x
560	Single-probe	0.231325	Chilodus_punctatus	CHARACIFORMES				x
483	Single-probe	0.231335	Aphyocharax_anisitsi	CHARACIFORMES
534	Single-probe	0.231572	Bryconamericus_rubropictus	CHARACIFORMES
538	Single-probe	0.231572	Bryconops_caudomaculatus	CHARACIFORMES				x
677	Single-probe	0.231572	Knodus_megalops	CHARACIFORMES				x
729	Single-probe	0.231572	Nantis_indefessus	CHARACIFORMES
808	Single-probe	0.232184	Pseudanos_trimaculatus	CHARACIFORMES				x
531	Single-probe	0.233446	Bryconamericus_iheringii	CHARACIFORMES
530	Single-probe	0.234185	Bryconamericus_exodon	CHARACIFORMES
900	Single-probe	0.234185	Tyttocharax_tambopatensis	CHARACIFORMES				x
474	Single-probe	0.23432	Ammocryptocharax_elegans	CHARACIFORMES
479	Single-probe	0.235161	Anodus_elongatus	CHARACIFORMES				x
682	Single-probe	0.235523	Laemolyta_proxima	CHARACIFORMES				x
542	Single-probe	0.235638	Caenotropus_labyrinthicus	CHARACIFORMES				x
567	Single-probe	0.235822	Colossoma_macropomum	CHARACIFORMES				x
646	Single-probe	0.23597	Hoplias_malabaricus	CHARACIFORMES				x
484	Single-probe	0.236455	Aphyocharax_dentatus	CHARACIFORMES
691	Single-probe	0.236516	Leporinus_desmotes	CHARACIFORMES
460	Single-probe	0.236808	Acrobrycon_ipanquianus	CHARACIFORMES				x
577	Single-probe	0.236808	Creagrutus_beni	CHARACIFORMES				x
578	Single-probe	0.236808	Creagrutus_changae	CHARACIFORMES				x
580	Single-probe	0.236808	Creagrutus_pila	CHARACIFORMES				x
632	Single-probe	0.236808	Hemibrycon_huambonicus	CHARACIFORMES				x
901	Single-probe	0.236808	Xenurobrycon_heterodon	CHARACIFORMES				x
857	Single-probe	0.237138	Semaprochilodus_insignis	CHARACIFORMES				x
499	Single-probe	0.237495	Astyanax_anterior	CHARACIFORMES
559	Single-probe	0.237804	Chilodus_fritillus	CHARACIFORMES				x
585	Single-probe	0.237804	Curimatella_dorsalis	CHARACIFORMES				x
645	Single-probe	0.237931	Hoplerythrinus_unitaeniatus	CHARACIFORMES				x
863	Single-probe	0.238074	Serrasalmus_marginatus	CHARACIFORMES
798	Single-probe	0.238309	Potamorhina_latior	CHARACIFORMES				x
858	Single-probe	0.239244	Serrapinnus_calliurus	CHARACIFORMES
532	Single-probe	0.239439	Bryconamericus_pachacuti	CHARACIFORMES				x
804	Single-probe	0.239642	Prochilodus_lineatus	CHARACIFORMES
555	Single-probe	0.239696	Chalceus_macrolepidotus	CHARACIFORMES				x
589	Single-probe	0.239696	Cynopotamus_argenteus	CHARACIFORMES
587	Single-probe	0.239849	Curimatopsis_macrolepis	CHARACIFORMES				x
674	Single-probe	0.239862	Knodus_breviceps	CHARACIFORMES
830	Single-probe	0.240183	Pyrrhulina_australis	CHARACIFORMES				x
627	Single-probe	0.240744	Hasemania_sp.	CHARACIFORMES
480	Single-probe	0.240874	Anostomus_ternetzi	CHARACIFORMES
673	Single-probe	0.241633	Jupiaba_acanthogaster	CHARACIFORMES
864	Single-probe	0.241633	Serrasalmus_rhombeus	CHARACIFORMES				x
498	Single-probe	0.242155	Astyanax_abramis	CHARACIFORMES				x
694	Single-probe	0.242155	Leporinus_macrocephalus	CHARACIFORMES
713	Single-probe	0.242299	Metynnis_hypsauchen	CHARACIFORMES				x
558	Single-probe	0.242661	Charax_tectifer	CHARACIFORMES				x
859	Single-probe	0.242739	Serrapinnus_kriegi	CHARACIFORMES
688	Single-probe	0.243062	Leporellus_vittatus	CHARACIFORMES				x
550	Single-probe	0.243717	Ceratobranchia_sp.	CHARACIFORMES
725	Single-probe	0.244153	Mylossoma_aureum	CHARACIFORMES				x
805	Single-probe	0.244248	Prochilodus_nigricans	CHARACIFORMES				x
537	Single-probe	0.244421	Bryconops_affinis	CHARACIFORMES
637	Single-probe	0.244421	Hemigrammus_marginatus	CHARACIFORMES				x
862	Single-probe	0.244421	Serrasalmus_maculatus	CHARACIFORMES				x
899	Single-probe	0.244421	Triportheus_nematurus	CHARACIFORMES
737	Single-probe	0.244513	Oligosarcus_jenynsii	CHARACIFORMES
871	Single-probe	0.244549	Steindachnerina_brevipinna	CHARACIFORMES
897	Single-probe	0.244587	Triportheus_angulatus	CHARACIFORMES				x
506	Single-probe	0.24473	Attonitus_ephimeros	CHARACIFORMES				x
549	Single-probe	0.24473	Ceratobranchia_obtusirostris	CHARACIFORMES				x
633	Single-probe	0.24473	Hemibrycon_jabonero	CHARACIFORMES				x
482	Single-probe	0.244891	Apareiodon_sp.	CHARACIFORMES
697	Single-probe	0.244895	Leporinus_trifasciatus	CHARACIFORMES				x
639	Single-probe	0.245758	Hemigrammus_pulcher	CHARACIFORMES				x
524	Single-probe	0.246142	Brycon_cephalus	CHARACIFORMES				x
865	Single-probe	0.246142	Serrasalmus_spilopleura	CHARACIFORMES				x
718	Single-probe	0.246997	Moenkhausia_intermedia	CHARACIFORMES
454	Single-probe	0.247109	Abramites_hypselonotus	CHARACIFORMES				x
533	Single-probe	0.24739	Bryconamericus_peruanus	CHARACIFORMES	x
579	Single-probe	0.24739	Creagrutus_occidaneus	CHARACIFORMES				x
634	Single-probe	0.24739	Hemibrycon_jelskii	CHARACIFORMES				x
526	Single-probe	0.247948	Brycon_melanopterus	CHARACIFORMES				x
839	Single-probe	0.248076	Rhoadsia_altipinna	CHARACIFORMES	x
640	Single-probe	0.248771	Hemiodus_microlepis	CHARACIFORMES
772	Single-probe	0.249125	Piaractus_mesopotamicus	CHARACIFORMES
653	Single-probe	0.249665	Hyphessobrycon_megalopterus	CHARACIFORMES
576	Single-probe	0.250059	Creagrutus_barrigai	CHARACIFORMES				x
902	Single-probe	0.250059	Xenurobrycon_polyancistrus	CHARACIFORMES				x
481	Single-probe	0.250483	Apareiodon_affinis	CHARACIFORMES
630	Single-probe	0.251776	Hemibrycon_beni	CHARACIFORMES
692	Single-probe	0.251879	Leporinus_fasciatus	CHARACIFORMES				x
719	Single-probe	0.252518	Moenkhausia_oligolepis	CHARACIFORMES				x
528	Single-probe	0.252737	Bryconamericus_caucanus	CHARACIFORMES				x
829	Single-probe	0.252995	Pygocentrus_nattereri	CHARACIFORMES				x
898	Single-probe	0.254057	Triportheus_elongatus	CHARACIFORMES				x
650	Single-probe	0.254531	Hyphessobrycon_eques	CHARACIFORMES				x
676	Single-probe	0.255426	Knodus_hypopterus	CHARACIFORMES				x
724	Single-probe	0.256715	Myloplus_rubripinnis	CHARACIFORMES
590	Single-probe	0.256906	Cyphocharax_festivus	CHARACIFORMES				x
507	Single-probe	0.258123	Attonitus_irisae	CHARACIFORMES				x
807	Single-probe	0.258242	Psellogrammus_kennedyi	CHARACIFORMES
763	Single-probe	0.259443	Parodon_hilarii	CHARACIFORMES
887	Single-probe	0.259443	Thayeria_boehlkei	CHARACIFORMES				x
602	Single-probe	0.260444	Erythrinus_erythrinus	CHARACIFORMES				x
631	Single-probe	0.260831	Hemibrycon_helleri	CHARACIFORMES				x
457	Single-probe	0.261614	Acestrorhynchus_lacustris	CHARACIFORMES				x
651	Single-probe	0.26523	Hyphessobrycon_erythrostigma	CHARACIFORMES				x
458	Single-probe	0.265665	Acestrorhynchus_pantaneiro	CHARACIFORMES
652	Single-probe	0.265974	Hyphessobrycon_herbertaxelrodi	CHARACIFORMES
849	Single-probe	0.267728	Salminus_affinis	CHARACIFORMES				x
614	Single-probe	0.268164	Gymnocorymbus_ternetzi	CHARACIFORMES				x
503	Single-probe	0.27334	Astyanax_fasciatus	CHARACIFORMES				x
850	Single-probe	0.274415	Salminus_brasiliensis	CHARACIFORMES				x
835	Single-probe	0.274772	Rhaphiodon_vulpinus	CHARACIFORMES				x
851	Single-probe	0.276657	Salminus_hilarii	CHARACIFORMES				x
505	Single-probe	0.283797	Astyanax_guaporensis	CHARACIFORMES
648	Single-probe	0.29494	Hydrolycus_scomberoides	CHARACIFORMES				x
767	Single-probe	0.227613	Pellona_flavipinnis	CLUPEIFORMES				x
766	Single-probe	0.238309	Pellona_castelnaeana	CLUPEIFORMES
592	Single-probe	0.178412	Cyprinus_carpio	CYPRINIFORMES
656	Single-probe	0.181742	Hypophthalmichthys_molitrix	CYPRINIFORMES
546	Single-probe	0.192093	Carassius_auratus	CYPRINIFORMES
794	Single-probe	0.229694	Poecilia_velifera	CYPRINODONTIFORMES
793	Single-probe	0.23597	Poecilia_reticulata	CYPRINODONTIFORMES
607	Single-probe	0.238597	Gambusia_affinis	CYPRINODONTIFORMES
904	Single-probe	0.242299	Xiphophorus_maculatus	CYPRINODONTIFORMES
588	Single-probe	0.250142	Cynolebias_sp.	CYPRINODONTIFORMES
608	Single-probe	0.250822	Gambusia_holbrooki	CYPRINODONTIFORMES
903	Single-probe	0.260181	Xiphophorus_hellerii	CYPRINODONTIFORMES
624	Single-probe	0.221491	Gymnotus_pantanal	GYMNOTIFORMES
619	Single-probe	0.22347	Gymnotus_carapo	GYMNOTIFORMES				x
832	Single-probe	0.228956	Rhamphichthys_lineatus	GYMNOTIFORMES				x
594	Single-probe	0.231786	Distocyclus_conirostris	GYMNOTIFORMES				x
620	Single-probe	0.242661	Gymnotus_chaviro	GYMNOTIFORMES				x
869	Single-probe	0.243291	Steatogenys_duidae	GYMNOTIFORMES				x
833	Single-probe	0.245362	Rhamphichthys_marmoratus	GYMNOTIFORMES				x
599	Single-probe	0.246549	Eigenmannia_virescens	GYMNOTIFORMES				x
598	Single-probe	0.248682	Eigenmannia_trilineata	GYMNOTIFORMES
716	Single-probe	0.24952	Microsternarchus_bilineatus	GYMNOTIFORMES				x
621	Single-probe	0.252811	Gymnotus_coropinae	GYMNOTIFORMES				x
597	Single-probe	0.254946	Eigenmannia_macrops	GYMNOTIFORMES				x
870	Single-probe	0.2558	Steatogenys_elegans	GYMNOTIFORMES				x
515	Single-probe	0.259235	Brachyhypopomus_brevirostris	GYMNOTIFORMES				x
623	Single-probe	0.261389	Gymnotus_jonasi	GYMNOTIFORMES				x
834	Single-probe	0.261389	Rhamphichthys_rostratus	GYMNOTIFORMES				x
596	Single-probe	0.263548	Eigenmannia_humboldtii	GYMNOTIFORMES				x
625	Single-probe	0.263548	Gymnotus_tigre	GYMNOTIFORMES				x
514	Single-probe	0.264257	Brachyhypopomus_bennetti	GYMNOTIFORMES
617	Single-probe	0.264257	Gymnorhamphichthys_rondoni	GYMNOTIFORMES				x
665	Single-probe	0.266386	Hypopygus_lepturus	GYMNOTIFORMES				x
666	Single-probe	0.270662	Hypopygus_neblinae	GYMNOTIFORMES
880	Single-probe	0.272626	Sternopygus_macrurus	GYMNOTIFORMES				x
622	Single-probe	0.27282	Gymnotus_inaequilabiatus	GYMNOTIFORMES
618	Single-probe	0.274964	Gymnorhamphichthys_rosamariae	GYMNOTIFORMES				x
616	Single-probe	0.27929	Gymnorhamphichthys_hypostomus	GYMNOTIFORMES				x
516	Single-probe	0.279506	Brachyhypopomus_pinnicaudatus	GYMNOTIFORMES				x
600	Single-probe	0.279684	Electrophorus_electricus	GYMNOTIFORMES				x
743	Single-probe	0.287448	Orthosternarchus_tamandua	GYMNOTIFORMES				x
513	Single-probe	0.287726	Brachyhypopomus_beebei	GYMNOTIFORMES				x
659	Single-probe	0.295008	Hypopomus_artedi	GYMNOTIFORMES				x
872	Single-probe	0.303528	Sternarchella_terminalis	GYMNOTIFORMES				x
876	Single-probe	0.305631	Sternarchorhamphus_muelleri	GYMNOTIFORMES				x
490	Single-probe	0.309301	Apteronotus_albifrons	GYMNOTIFORMES				x
879	Single-probe	0.311791	Sternarchorhynchus_oxyrhynchus	GYMNOTIFORMES				x
462	Single-probe	0.318002	Adontosternarchus_clarkae	GYMNOTIFORMES				x
491	Single-probe	0.318002	Apteronotus_bonapartii	GYMNOTIFORMES				x
761	Single-probe	0.318002	Parapteronotus_hasemani	GYMNOTIFORMES				x
795	Single-probe	0.318002	Porotergus_gimbeli	GYMNOTIFORMES				x
461	Single-probe	0.324265	Adontosternarchus_balaenops	GYMNOTIFORMES				x
568	Single-probe	0.324265	Compsaraia_samueli	GYMNOTIFORMES				x
873	Single-probe	0.324265	Sternarchogiton_nattereri	GYMNOTIFORMES				x
796	Single-probe	0.327417	Porotergus_gymnotus	GYMNOTIFORMES
874	Single-probe	0.327417	Sternarchogiton_porcinum	GYMNOTIFORMES				x
875	Single-probe	0.330581	Sternarchogiton_preto	GYMNOTIFORMES				x
464	Single-probe	0.331417	Adontosternarchus_sachsi	GYMNOTIFORMES				x
492	Single-probe	0.331417	Apteronotus_leptorhynchus	GYMNOTIFORMES				x
463	Single-probe	0.333759	Adontosternarchus_nebulosus	GYMNOTIFORMES				x
877	Single-probe	0.333788	Sternarchorhynchus_hagedornae	GYMNOTIFORMES				x
792	Single-probe	0.336951	Platyurosternarchus_macrostomus	GYMNOTIFORMES				x
878	Single-probe	0.35639	Sternarchorhynchus_mormyrus	GYMNOTIFORMES				x
721	Single-probe	0.246549	Mugil_cephalus	MUGILIFORMES	x
722	Single-probe	0.262095	Mugil_curema	MUGILIFORMES	x
493	Single-probe	0.235123	Arapaima_gigas	OSTEOGLOSSIFORMES				x
747	Single-probe	0.246207	Osteoglossum_bicirrhosum	OSTEOGLOSSIFORMES				x
456	Single-probe	0.226756	Acaronia_nassa	PERCIFORMES				x
684	Single-probe	0.226756	Laetacara_thayeri	PERCIFORMES				x
612	Single-probe	0.227079	Gobiomorus_maculatus	PERCIFORMES	x
854	Single-probe	0.227951	Satanoperca_pappaterra	PERCIFORMES
740	Single-probe	0.228464	Oreochromis_mossambicus	PERCIFORMES
478	Single-probe	0.229694	Andinoacara_rivulatus	PERCIFORMES	x
562	Single-probe	0.230613	Cichla_monoculus	PERCIFORMES				x
712	Single-probe	0.234011	Mesonauta_festivus	PERCIFORMES				x
883	Single-probe	0.234011	Tahuantinsuyoa_macantzatza	PERCIFORMES				x
539	Single-probe	0.234931	Bujurquina_vittata	PERCIFORMES
610	Single-probe	0.237253	Geophagus_steindachneri	PERCIFORMES				x
595	Single-probe	0.237763	Dormitator_latifrons	PERCIFORMES	x
564	Single-probe	0.23937	Cichlasoma_bimaculatum	PERCIFORMES
741	Single-probe	0.239696	Oreochromis_mossambicus	PERCIFORMES
497	Single-probe	0.240183	Astronotus_ocellatus	PERCIFORMES				x
563	Single-probe	0.240681	Cichla_piquiti	PERCIFORMES
889	Single-probe	0.240744	Tilapia_rendalli	PERCIFORMES
496	Single-probe	0.242299	Astronotus_crassipinnis	PERCIFORMES				x
565	Single-probe	0.243518	Cichlasoma_dimerus	PERCIFORMES
466	Single-probe	0.245758	Aequidens_tetramerus	PERCIFORMES				x
757	Single-probe	0.246102	Pachypops_fourcroi	PERCIFORMES				x
783	Single-probe	0.246886	Plagioscion_auratus	PERCIFORMES				x
715	Single-probe	0.24839	Microphilypnus_sp.	PERCIFORMES
615	Single-probe	0.248682	Gymnogeophagus_balzanii	PERCIFORMES
609	Single-probe	0.249065	Geophagus_proximus	PERCIFORMES				x
553	Single-probe	0.250047	Chaetobranchus_flavescens	PERCIFORMES				x
671	Single-probe	0.253711	Hypselecara_temporalis	PERCIFORMES				x
742	Single-probe	0.25543	Oreochromis_urolepis	PERCIFORMES
784	Single-probe	0.255654	Plagioscion_squamosissimus	PERCIFORMES				x
643	Single-probe	0.255658	Heros_efasciatus	PERCIFORMES				x
465	Single-probe	0.256092	Aequidens_diadema	PERCIFORMES				x
554	Single-probe	0.26231	Chaetobranchus_semifasciatus	PERCIFORMES				x
611	Single-probe	0.263791	Gerres_cinereus	PERCIFORMES	x
644	Single-probe	0.266315	Heros_severus	PERCIFORMES
601	Single-probe	0.270864	Eleotris_picta	PERCIFORMES	x
494	Single-probe	0.275417	Archocentrus_nigrofasciatus	PERCIFORMES				x
758	Single-probe	0.276987	Pachyurus_bonariensis	PERCIFORMES
581	Single-probe	0.287527	Crenicara_punctulatum	PERCIFORMES				x
717	Single-probe	0.297104	Mikrogeophagus_altispinosus	PERCIFORMES
486	Single-probe	0.313358	Apistogramma_cacatuoides	PERCIFORMES				x
582	Single-probe	0.313358	Crenicichla_lepidota	PERCIFORMES
488	Single-probe	0.327612	Apistogrammoides_pucallpaensis	PERCIFORMES				x
583	Single-probe	0.329201	Crenicichla_vittata	PERCIFORMES
487	Single-probe	0.335754	Apistogramma_linkei	PERCIFORMES
654	Single-probe	0.245567	Hypoclinemus_mentalis	PLEURONECTIFORMES				x
459	Single-probe	0.251899	Achirus_achirus	PLEURONECTIFORMES				x
547	Single-probe	0.267391	Catathyridium_jenynsii	PLEURONECTIFORMES
852	Single-probe	0.245213	Salmo_trutta	SALMONIFORMES
853	Single-probe	0.260181	Salvelinus_fontinalis	SALMONIFORMES
738	Single-probe	0.268164	Oncorhynchus_mykiss	SALMONIFORMES
824	Single-probe	0.204948	Pterygoplichthys_ambrosettii	SILURIFORMES
891	Single-probe	0.20712	Trachelyopterus_striatulus	SILURIFORMES
825	Single-probe	0.208224	Pterygoplichthys_anisitsi	SILURIFORMES
828	Single-probe	0.208601	Pterygoplichthys_pardalis	SILURIFORMES
670	Single-probe	0.208954	Hypostomus_plecostomus	SILURIFORMES
826	Single-probe	0.210058	Pterygoplichthys_disjunctivus	SILURIFORMES
827	Single-probe	0.211174	Pterygoplichthys_gibbiceps	SILURIFORMES
803	Single-probe	0.216006	Probe-PIMELODELLAsp_51	SILURIFORMES
759	Single-probe	0.217373	Panaque_sp.	SILURIFORMES
905	Single-probe	0.217964	Zungaro_jahu	SILURIFORMES
708	Single-probe	0.219349	Loricariichthys_platymetopon	SILURIFORMES
668	Single-probe	0.221677	Hypostomus_carinatus	SILURIFORMES
626	Single-probe	0.225539	Harttia_sp.	SILURIFORMES
812	Single-probe	0.225849	Pseudopimelodus_mangurus	SILURIFORMES
894	Single-probe	0.226162	Trachydoras_paraguayensis	SILURIFORMES
473	Single-probe	0.226522	Amblydoras_affinis	SILURIFORMES
709	Single-probe	0.227613	Luciopimelodus_pati	SILURIFORMES
762	Single-probe	0.230308	Parastegophilus_maculatus	SILURIFORMES
520	Single-probe	0.231817	Brachyplatystoma_platynemum	SILURIFORMES
802	Single-probe	0.233817	Probe-P_punctifer_70	SILURIFORMES
667	Single-probe	0.233863	Hypostomus_boulengeri	SILURIFORMES
672	Single-probe	0.234624	Ixinandria_steinbachi	SILURIFORMES
477	Single-probe	0.23597	Ancistrus_cirrhosus	SILURIFORMES
814	Single-probe	0.23597	Pseudoplatystoma_corruscans	SILURIFORMES
843	Single-probe	0.236993	Rineloricaria_parva	SILURIFORMES
575	Single-probe	0.237289	Corydoras_sterbai	SILURIFORMES
892	Single-probe	0.23919	Trachydoras_brevis	SILURIFORMES
800	Single-probe	0.239849	Probe-O_niger_134	SILURIFORMES
820	Single-probe	0.241361	Pterobunocephalus_depressus	SILURIFORMES
572	Single-probe	0.242299	Corydoras_paleatus	SILURIFORMES
815	Single-probe	0.242299	Pseudoplatystoma_fasciatum	SILURIFORMES
801	Single-probe	0.243898	Probe-P_pinirampu_62	SILURIFORMES
714	Single-probe	0.244248	Microglanis_parahybae	SILURIFORMES
775	Single-probe	0.244421	Pimelodella_laticeps	SILURIFORMES
777	Single-probe	0.244549	Pimelodus_albicans	SILURIFORMES
495	Single-probe	0.246289	Astrodoras_asterifrons	SILURIFORMES
571	Single-probe	0.246886	Corydoras_nattereri	SILURIFORMES
744	Single-probe	0.249803	Ossancora_asterophysa	SILURIFORMES
764	Single-probe	0.250095	Parotocinclus_sp.	SILURIFORMES
509	Single-probe	0.250822	Auchenipterus_nigripinnis	SILURIFORMES
838	Single-probe	0.252968	Rhinodoras_dorbignyi	SILURIFORMES
703	Single-probe	0.25463	Leptodoras_linnelli	SILURIFORMES
508	Single-probe	0.256812	Auchenipterichthys_longimanus	SILURIFORMES
753	Single-probe	0.258557	Oxydoras_kneri	SILURIFORMES
746	Single-probe	0.26103	Ossancora_punctata	SILURIFORMES
810	Single-probe	0.26103	Pseudobunocephalus_rugosus	SILURIFORMES
698	Single-probe	0.262327	Lepthoplosternum_pectorale	SILURIFORMES
510	Single-probe	0.263791	Auchenipterus_osteomystax	SILURIFORMES
663	Single-probe	0.268659	Hypoptopoma_inexspectatum	SILURIFORMES
662	Single-probe	0.27076	Hypoptopoma_incognitum	SILURIFORMES
745	Single-probe	0.274729	Ossancora_fimbriata	SILURIFORMES
787	Single-probe	0.276153	Platydoras_costatus	SILURIFORMES
788	Single-probe	0.277573	Platydoras_hancockii	SILURIFORMES
521	Single-probe	0.204363	Brachyplatystoma_rousseauxii	SILURIFORMES				x
785	Single-probe	0.204363	Planiloricaria_cryptodon	SILURIFORMES				x
658	Single-probe	0.208224	Hypophthalmus_marginatus	SILURIFORMES				x
890	Single-probe	0.208224	Trachelyopterus_galeatus	SILURIFORMES				x
613	Single-probe	0.210162	Goeldiella_eques	SILURIFORMES				x
831	Single-probe	0.210162	Rhamdia_quelen	SILURIFORMES				x
706	Single-probe	0.210332	Loricaria_cataphracta	SILURIFORMES				x
471	Single-probe	0.212105	Aguarunichthys_torosus	SILURIFORMES				x
517	Single-probe	0.212105	Brachyplatystoma_capapretum	SILURIFORMES				x
518	Single-probe	0.212105	Brachyplatystoma_filamentosum	SILURIFORMES				x
522	Single-probe	0.212105	Brachyplatystoma_tigrinum	SILURIFORMES				x
657	Single-probe	0.212105	Hypophthalmus_edentatus	SILURIFORMES				x
552	Single-probe	0.214053	Cetopsis_coecutiens	SILURIFORMES				x
669	Single-probe	0.214651	Hypostomus_cochliodon	SILURIFORMES				x
647	Single-probe	0.21468	Hoplosternum_littorale	SILURIFORMES				x
811	Single-probe	0.216006	Pseudopimelodus_bufonius	SILURIFORMES				x
551	Single-probe	0.219645	Cetopsis_candiru	SILURIFORMES				x
752	Single-probe	0.220303	Otocinclus_vittatus	SILURIFORMES				x
819	Single-probe	0.22034	Pseudostegophilus_nemurus	SILURIFORMES				x
573	Single-probe	0.221407	Corydoras_panda	SILURIFORMES				x
707	Single-probe	0.221896	Loricariichthys_maculatus	SILURIFORMES				x
523	Single-probe	0.22387	Brachyplatystoma_vaillantii	SILURIFORMES				x
604	Single-probe	0.22387	Farlowella_oxyrryncha	SILURIFORMES				x
605	Single-probe	0.22387	Farlowella_smithi	SILURIFORMES				x
765	Single-probe	0.22387	Peckoltia_vittata	SILURIFORMES				x
748	Single-probe	0.225849	Otocinclus_cocama	SILURIFORMES				x
789	Single-probe	0.225849	Platynematichthys_notatus	SILURIFORMES				x
817	Single-probe	0.225849	Pseudoplatystoma_tigrinum	SILURIFORMES				x
540	Single-probe	0.227496	Bunocephalus_coracoideus	SILURIFORMES				x
866	Single-probe	0.227833	Sorubim_elongatus	SILURIFORMES				x
773	Single-probe	0.229528	Pimelodella_gracilis	SILURIFORMES				x
519	Single-probe	0.229822	Brachyplatystoma_juruense	SILURIFORMES				x
768	Single-probe	0.229822	Phractocephalus_hemioliopterus	SILURIFORMES				x
867	Single-probe	0.229822	Sorubim_lima	SILURIFORMES				x
704	Single-probe	0.230007	Leptodoras_myersi	SILURIFORMES				x
790	Single-probe	0.231817	Platysilurus_mucosus	SILURIFORMES				x
906	Single-probe	0.231817	Zungaro_zungaro	SILURIFORMES				x
705	Single-probe	0.232181	Liosomadoras_oncinus	SILURIFORMES				x
779	Single-probe	0.233478	Pimelodus_maculatus	SILURIFORMES				x
603	Single-probe	0.233817	Farlowella_nattereri	SILURIFORMES				x
778	Single-probe	0.233817	Pimelodus_blochii	SILURIFORMES				x
813	Single-probe	0.233817	Pseudopimelodus_pulcher	SILURIFORMES				x
816	Single-probe	0.233817	Pseudoplatystoma_punctifer	SILURIFORMES				x
818	Single-probe	0.233817	Pseudorinelepis_genibarbis	SILURIFORMES				x
468	Single-probe	0.233872	Agamyxis_pectinifrons	SILURIFORMES				x
541	Single-probe	0.233933	Bunocephalus_verrucosus	SILURIFORMES				x
469	Single-probe	0.234281	Ageneiosus_inermis	SILURIFORMES				x
570	Single-probe	0.234347	Corydoras_elegans	SILURIFORMES				x
467	Single-probe	0.234361	Agamyxis_albomaculatus	SILURIFORMES				x
686	Single-probe	0.234837	Lasiancistrus_schomburgkii	SILURIFORMES				x
821	Single-probe	0.235264	Pterodoras_granulosus	SILURIFORMES				x
749	Single-probe	0.235687	Otocinclus_hoppei	SILURIFORMES				x
868	Single-probe	0.23597	Sorubimichthys_planiceps	SILURIFORMES				x
641	Single-probe	0.237833	Hemisorubim_platyrhynchos	SILURIFORMES				x
489	Single-probe	0.238244	Apistoloricaria_ommation	SILURIFORMES				x
842	Single-probe	0.23884	Rineloricaria_lanceolata	SILURIFORMES				x
642	Single-probe	0.239849	Henonemus_punctatus	SILURIFORMES				x
754	Single-probe	0.239849	Oxydoras_niger	SILURIFORMES				x
730	Single-probe	0.24094	Nemadoras_elongatus	SILURIFORMES				x
895	Single-probe	0.241395	Trachydoras_steindachneri	SILURIFORMES				x
545	Single-probe	0.241871	Calophysus_macropterus	SILURIFORMES				x
574	Single-probe	0.241871	Corydoras_rabauti	SILURIFORMES				x
687	Single-probe	0.241871	Leiarius_marmoratus	SILURIFORMES				x
776	Single-probe	0.241871	Pimelodina_flavipinnis	SILURIFORMES				x
727	Single-probe	0.243211	Nannoptopoma_spectabile	SILURIFORMES				x
699	Single-probe	0.243605	Leptodoras_acipenserinus	SILURIFORMES				x
700	Single-probe	0.243605	Leptodoras_cataniai	SILURIFORMES				x
782	Single-probe	0.243898	Pinirampus_pirinampu	SILURIFORMES				x
791	Single-probe	0.243898	Platystomatichthys_sturio	SILURIFORMES				x
881	Single-probe	0.243898	Sturisoma_nigrirostrum	SILURIFORMES				x
756	Single-probe	0.244241	Oxyropsis_wrightiana	SILURIFORMES				x
774	Single-probe	0.244421	Pimelodella_lateristriga	SILURIFORMES				x
455	Single-probe	0.245358	Acanthodoras_cataphractus	SILURIFORMES				x
893	Single-probe	0.245823	Trachydoras_nattereri	SILURIFORMES				x
685	Single-probe	0.24593	Lamontichthys_filamentosus	SILURIFORMES				x
781	Single-probe	0.246549	Pimelodus_pictus	SILURIFORMES				x
701	Single-probe	0.246757	Leptodoras_copei	SILURIFORMES				x
770	Single-probe	0.248047	Physopyxis_lyra	SILURIFORMES				x
702	Single-probe	0.249803	Leptodoras_juruensis	SILURIFORMES				x
733	Single-probe	0.249803	Nemadoras_trimaculatus	SILURIFORMES				x
780	Single-probe	0.250012	Pimelodus_ornatus	SILURIFORMES				x
751	Single-probe	0.250674	Otocinclus_vestitus	SILURIFORMES				x
569	Single-probe	0.250822	Corydoras_aeneus	SILURIFORMES				x
655	Single-probe	0.252012	Hypodoras_forficulatus	SILURIFORMES				x
732	Single-probe	0.252035	Nemadoras_humeralis	SILURIFORMES				x
769	Single-probe	0.252035	Physopyxis_ananas	SILURIFORMES				x
837	Single-probe	0.252035	Rhinodoras_boehlkei	SILURIFORMES				x
710	Single-probe	0.252354	Megalechis_thoracata	SILURIFORMES				x
660	Single-probe	0.252981	Hypoptopoma_bilobatum	SILURIFORMES				x
750	Single-probe	0.253854	Otocinclus_mariae	SILURIFORMES				x
512	Single-probe	0.254116	Batrochoglanis_raninus	SILURIFORMES				x
731	Single-probe	0.257209	Nemadoras_hemipeltis	SILURIFORMES				x
472	Single-probe	0.257869	Amaralia_hypsiura	SILURIFORMES				x
629	Single-probe	0.25863	Hassar_orestis	SILURIFORMES				x
593	Single-probe	0.259114	Dianema_longibarbis	SILURIFORMES				x
739	Single-probe	0.26103	Opsodoras_morei	SILURIFORMES				x
664	Single-probe	0.262853	Hypoptopoma_steindachneri	SILURIFORMES				x
475	Single-probe	0.263801	Anadoras_grypus	SILURIFORMES				x
635	Single-probe	0.263801	Hemidoras_morrisi	SILURIFORMES				x
786	Single-probe	0.264297	Platydoras_armatulus	SILURIFORMES				x
628	Single-probe	0.264817	Hassar_affinis	SILURIFORMES				x
755	Single-probe	0.265991	Oxyropsis_carinata	SILURIFORMES				x
661	Single-probe	0.267034	Hypoptopoma_gulare	SILURIFORMES				x
548	Single-probe	0.267621	Centrodoras_brachiatus	SILURIFORMES				x
470	Single-probe	0.267849	Ageneiosus_ucayalensis	SILURIFORMES				x
809	Single-probe	0.267849	Pseudepapterus_hasemani	SILURIFORMES				x
544	Single-probe	0.268659	Callichthys_callichthys	SILURIFORMES				x
476	Single-probe	0.270135	Anadoras_weddellii	SILURIFORMES				x
711	Single-probe	0.270656	Megalodoras_uranoscopus	SILURIFORMES				x
636	Single-probe	0.28193	Hemidoras_stenopeltis	SILURIFORMES				x
882	Single-probe	0.268164	Synbranchus_marmoratus	SYNBRANCHIFORMES				x
566	Single-probe	0.257278	Colomesus_asellus	TETRAODONTIFORMES				x
485	Single-probe	0.366359	Apistogramma_bitaeniata	PERCIFORMES				x
393	Siluriform-probes	1.11232	Rivulus_rubrolineatus	CYPRINODONTIFORMES				x
392	Siluriform-probes	1.1488	Rivulus_rectocaudatus	CYPRINODONTIFORMES				x
822	Single-probe	1.1488	Pterolebias_longipinnis	CYPRINODONTIFORMES
845	Single-probe	1.1488	Rivulus_rectocaudatus	CYPRINODONTIFORMES				x
391	Siluriform-probes	1.1582	Rivulus_ophiomimus	CYPRINODONTIFORMES				x
844	Single-probe	1.18714	Rivulus_ophiomimus	CYPRINODONTIFORMES				x
370	Siluriform-probes	1.19704	Pterolebias_phasianus	CYPRINODONTIFORMES
369	Siluriform-probes	1.20708	Pterolebias_longipinnis	CYPRINODONTIFORMES
131	Siluriform-probes	1.21387	Ctenopharyngodon_idella	CYPRINIFORMES
823	Single-probe	1.21725	Pterolebias_phasianus	CYPRINODONTIFORMES
443	Siluriform-probes	1.23801	Trigonectes_balzanii	CYPRINODONTIFORMES
584	Single-probe	1.23988	Ctenopharyngodon_idella	CYPRINIFORMES
846	Single-probe	1.24861	Rivulus_rubrolineatus	CYPRINODONTIFORMES				x
896	Single-probe	1.25936	Trigonectes_balzanii	CYPRINODONTIFORMES
281	Siluriform-probes	1.30399	Neofundulus_paraguayensis	CYPRINODONTIFORMES
734	Single-probe	1.35143	Neofundulus_paraguayensis	CYPRINODONTIFORMES
799	Single-probe	NA	Probe-COI_DANIO	SILURIFORMES
