# Supplementary material for: Metabarcoding by capture using a single COI probe (MCSP) to identify and quantify fish species in ichthyoplankton swarms
Source: PLoS One. 2018 Sep 12;13(9):e0202976. doi: 10.1371/journal.pone.0202976 (PMC6135497; doi:10.1371/journal.pone.0202976)
Supplement: S1 Text — (R) [file pone.0202976.s001.R]

-------------------------------------------------------------
#-------------------Bioinformatic traitment of raw reads-----
-------------------------------------------------------------
 ## Demultiplexing : freely available PYTHON script DEMULADAPT (https://github.com/Maillol/demultadapt) 
0-mismatch threshold.

 ## Adapters and low-quality bases were removed using CUTADAPT 1.2.1 (Martin 2011) 
 quality cut-off = 20, 
 minimum overlap = 7 
 minimum length = 35. 
 
 ## Filtering on mean quality : freely available PERL script (https://github.com/SouthGreenPlatform/arcad-hts/blob/master/scripts/arcad_hts_2_Filter_Fastq_On_Mean_Quality.pl). 
 Reads with a mean quality lower than 30 were removed
 

-------------------------------------------------------------
#-------------------BUILT COI database----------------------
-------------------------------------------------------------

##  extract COI sequences from Genebank

((((("Actinopterygii"[Organism] AND COI[gene]) OR ("Actinopterygii"[Organism] AND COX[gene]) OR ("Actinopterygii"[Organism] AND cytochrome c oxidase[gene] AND subunit[All Fields]) AND 300:2000[Sequence Length])) NOT NADH
## Modifications of the DB :
          ### Added :  
          AB054128, AP012011, KT952458, KT952457, KT952459, BOLD:AAC75, KX086791.1  , COI extract from full mitogenome (Corydoras rabauti,  Diplomystes nahuelbutaensis)

          ###removed :
          KU692455, 54 , 53 ; NC015813.1 ; HQ689374.1 ; GU060426.1

-------------------------------------------------------------
#-------------------MAPPING NGS reads  ----------------------
-------------------------------------------------------------

# MALT built index database
/data2/projects/pimelo-larvamaz/MALT-0.3.8/malt-build -i NCBI-COI-bonyfish-09042017-include-additionnal-COI.fasta  -d index-shearing --sequenceType DNA --classify Taxonomy
## MALT run ()
/data2/projects/pimelo-larvamaz/MALT-0.3.8/malt-run -m BlastN -at SemiGlobal -i /data2/projects/pimelo-larvamaz/Article-Danio/Megan-on-R1+R2-file/Fastq-R1+R2-file/ -o /data2/projects/pimelo-larvamaz/Article-Danio/Megan-on-R1+R2-file/Fastq-R1+R2-file/ -a /data2/projects/pimelo-larvamaz/Article-Danio/Megan-on-R1+R2-file/Fastq-R1+R2-file --index index &

-------------------------------------------------------------
#--------------------- EXTRACTION FROM DB 
-------------------------------------------------------------

     ## draw density plot of genetic distance between probes and amazonian fish
     ##  From our multifasta reference Database extract a list (store in file) of species (Bolivian fish). 
     ##create a list under excel with the species (genus_species) extracted from Ortega (2012) + Sarmiento (2014)/ remove duplicate / remplacer espace par "_"

# format DB for extraction :'
## replace space by "_" perform 2 times
sed -i -- 's/ /_/g' NCBI-COI-bonyfish-09042017-include-additionnal-COI.fasta     

## remove "space"
sed -i -- 's/ >//g' NCBI-COI-bonyfish-09042017-include-additionnal-COI-for_extraction_boliviansp.fasta 

## some sequences are not well formatted (duplicate ">" ">" in header name), this must be corrected
 DB file for extraction = NCBI-COI-bonyfish-09042017-include-additionnal-COI-for_extraction_boliviansp.fasta
## extraction   ## extraction with redondancy
 
for i in $(cat list-Ortega-Sarmiento.txt); do awk -v key=$i 'BEGIN {RS=">"} match($0, key) {print ">"key"__"$0}' NCBI-COI-bonyfish-09042017-include-additionnal-COI-for_extraction_boliviansp.fasta  >> Ortega-Sarmiento-sp-with-redondancy.fasta.txt ; done

## extraction without redondancy base on specie name

for i in $(cat list-Ortega-Sarmiento.txt); do awk -v key=$i 'BEGIN {RS=">"} match($0, key) {print ">"$0;exit;}' Ortega-Sarmiento-sp-with-redondancy.fasta.txt  >> Ortega-Sarmiento-sp-uniq.fasta.txt ; done

## alignement de ces sequences apres ajout de danio rerio pour le graphes des distances
# remove double line (notepad)

# ouvrir avec mega le fichier aln / convertir en projet mega / ouvrir le projet et calculer les distances 
#  exporter les distances en colonne vers csv
# formattage sous excel

-----------------------------------------------------------------
# ---FIGURE1 Density plot of Distance between Probes and  Target 
-----------------------------------------------------------------
library(car)
# Graphe   : exclure les distances > � 1 car sequence non COI ou tres partielles 
 Dataset <- read.table("clipboard", header=TRUE, sep="", na.strings="NA", dec=".", strip.white=TRUE)
                         , res = 300
 
# win.graph(width = 20, height = 12)
                             
tiff("Plot4b.tiff", width = 3200, height = 1600,res = 250,compression = 'lzw')
par(mfrow=c(1,2),cex.axis =1.5, cex.lab=2,oma=c(0,0,0,0),mar=c(5,5,4,2))

col <- c("red", "black", "forestgreen", "orange", "blue", "yellow", "hotpink")
lty <- c("solid")

densityPlot(Genetic.distance~Probe,Dataset, legend.location="topleft",  adjust=1.0, kernel="gaussian", grid=F, lty=c(1,1),ylim=c(0,22), xlim=c(0,0.37), bw="SJ",xlab="Genetic distance" )
abline(v=c(0.266), col=c("red"), lty=2, lwd=c(1, 3)) 
title(main="A",adj = 0, cex.main=3)
densityPlot(Genetic.distance~Probe, legend.location="topleft", subset(Dataset, ORDER=="SILURIFORMES"), show.bw="SJ", adjust=1.0, kernel="gaussian", grid=F, lty=c(1,1),xlim=c(0,0.37),ylim=c(0,22),xlab="Genetic distance")
title(main="B",adj = 0, cex.main=3)
abline(v=c(0.266), col=c("red"), lty=2, lwd=c(1, 3))                 
#legend('topleft', c("Danio probe","Silurifom probes"), col=c("black","red"), lty=c(1,2),lwd=3, bty='o', inset=0.15)
dev.off()
-----------------------------------------------------------------
-------#  FIGURE 3    : correlations NGS SANGER---
-----------------------------------------------------------------
rm(list=ls())
setwd("C:/Users/mariac/Desktop")
library(plotrix)
Dataset <- read.table("clipboard", header=TRUE, sep="", na.strings="NA", dec=".", strip.white=TRUE)


tiff("Figurex.tiff", width = 6400, height = 3200,res = 400,compression = 'lzw')
par(mfrow=c(1,2),cex.axis =1.2,cex.main=1.5, cex.lab=1.4,oma=c(0,0,0,0),mar=c(5,5,4,2))
## MOCKS only Silures----

#RegModel.1 <- lm(Mock.SD~SANGER, data=subset(Dataset, Order=="Siluriform"))
#RegModel.2 <- lm(Mock.SSil~SANGER, data=subset(Dataset, Order=="Siluriform"))
#
#plot(data=subset(Dataset, Order=="Siluriform"),Mock.SD~SANGER,  xlab = "",  ylab = "", pch=16 ,col="blue" ,xlim=c(0,0.5), ylim=c(0,0.5), yaxt="n")
#ablineclip(RegModel.1, x1=0, x2=0.45, col="blue")
#text(0.35,0.3,paste("r =",signif(sqrt(summary(RegModel.1)$r.squared),3),"\n p-value:",format(signif(summary(RegModel.1)$coefficients[2,4],3),scientific=T) ),pos=4, col="blue", font=2 )
#par(new=T)
#plot(data=subset(Dataset, Order=="Siluriform"),Mock.SSil~SANGER,  xlab = "SANGER",  ylab = "NGS", pch=17 ,col="red", xlim=c(0,0.5), ylim=c(0,0.5))   
#ablineclip(RegModel.2, x1=00, x2=0.42, col="red")
#text(0.2,0.42,paste("r =",signif(sqrt(summary(RegModel.2)$r.squared),3),"\n p-value:",format(signif(summary(RegModel.2)$coefficients[2,4],3),scientific=T) ),pos=4, col="red", font=2)
#title((main="Correlation between Sanger and NGS-Mocks frequencies\n Only Siluriform species" ))
#legend('topleft', c("Single probe","Silurifom probes"), col=c("blue","red"), pch=c(16,17), bty='o') 

## MOCKS all species----------------

RegModel.3 <- lm(Mock.SD~SANGER, data=Dataset)
RegModel.4 <- lm(Mock.SSil~SANGER, data=Dataset)

plot(data=Dataset,Mock.SD~SANGER,  xlab = "",  ylab = "", pch=16 ,col="blue" ,xlim=c(0,0.5), ylim=c(0,0.5), yaxt="n")
ablineclip(RegModel.3, x1=0, x2=0.45, col="blue")
text(0.35,0.3,paste("r =",signif(sqrt(summary(RegModel.3)$r.squared),2),"\n p-value:",format(signif(summary(RegModel.3)$coefficients[2,4],3),scientific=T) ),pos=4, col="blue", font=2 )
par(new=T)
plot(data=Dataset,Mock.SSil~SANGER,  xlab = "SANGER",  ylab = "NGS", pch=17 ,col="red", xlim=c(0,0.5), ylim=c(0,0.5))   
ablineclip(RegModel.4, x1=00, x2=0.45, col="red")
text(0.25,0.4,paste("r =",signif(sqrt(summary(RegModel.4)$r.squared),2),"\n p-value:",format(signif(summary(RegModel.4)$coefficients[2,4],3),scientific=T) ),pos=4, col="red", font=2)
#title((main="Correlation between Sanger and NGS-Mocks frequencies\n All species (Characiform, Siluriform)" ))
title((main="Correlation between Sanger and NGS-Mocks frequencies" ))
legend('topleft', c("Single probe","Silurifom probes"), col=c("blue","red"), pch=c(16,17), bty='o') 

## BULKS-----------------

#par(mfrow=c(1,1),cex.axis =1.2,cex.main=1.5, cex.lab=1.4,oma=c(0,0,0,0),mar=c(5,5,4,2))
RegModel.1 <- lm(Bulk.SD~SANGER, data=Dataset)
RegModel.2 <- lm(Bulk.SSil~SANGER, data=Dataset)

plot(data=Dataset,Bulk.SD~SANGER,  xlab = "",  ylab = "", pch=16 ,col="blue" ,xlim=c(0,0.5), ylim=c(0,0.8), yaxt="n")
ablineclip(RegModel.1, x1=0, x2=0.45, col="blue")
text(0.35,0.25,paste("r =",signif(sqrt(summary(RegModel.1)$r.squared),2),"\n p-value:",format(signif(summary(RegModel.1)$coefficients[2,4],3),scientific=T) ),pos=4, col="blue", font=2 )
par(new=T)
plot(data=Dataset,Bulk.SSil~SANGER,  xlab = "SANGER",  ylab = "NGS", pch=17 ,col="red", xlim=c(0,0.5), ylim=c(0,0.8))   
ablineclip(RegModel.2, x1=00, x2=0.45, col="red")
text(0.35,0.5,paste("r =",signif(sqrt(summary(RegModel.2)$r.squared),2),"\n p-value:",format(signif(summary(RegModel.2)$coefficients[2,4],3),scientific=T) ),pos=4, col="red", font=2)
title((main="Correlation between Sanger and NGS-Bulks frequencies" ))
legend('topleft', c("Single probe","Silurifom probes"), col=c("blue","red"), pch=c(16,17), bty='o') 
 dev.off()
-----------------------------------------------------------------
# : FIGURE 4 Frequency differential Linear regression----
-----------------------------------------------------------------
setwd("C:/Users/mariac/Desktop")
rm(list=ls())
Dataset <- read.table("clipboard", header=TRUE, sep="", na.strings="NA", dec=".", strip.white=TRUE)
library(plotrix)
tiff("Figure3.tiff", width = 4800, height = 4800,res = 600,compression = 'lzw')

## Linear regression Siluriform probes

par(mfrow=c(1,1),cex.axis =1.2,cex.main=1.5, cex.lab=1.4,oma=c(0,0,0,0),mar=c(5,5,4,2))
RegModel1 <- lm(X1Differentiel.freq~X1Distance.to.probe,data=Dataset)
summary(RegModel1)

#plot(X1Differentiel.freq~X1Distance.to.probe,data=Dataset,  xlab = "",   ylab = "", pch=17 ,col="red", xlim=c(0,0.3),ylim=c(-15, 33), cex.axis=1.2 , cex.lab=1.3,yaxt="n")
#ablineclip(RegModel1, x1=0, x2=0.3, col="red")
#text(0.01,15,paste("r� =",signif(summary(RegModel1)$r.squared,3),"\n p-value=",format(signif(summary(RegModel1)$coefficients[2,4],3),scientific=T) ),pos=4, col="red", font=2)  

plot(X1Differentiel.freq~X1Distance.to.probe,data=Dataset,  xlab = "",   ylab = "", pch=17 ,col="red", xlim=c(0,0.3),ylim=c(-15, 33), cex.axis=1.2 , cex.lab=1.3,yaxt="n")
ablineclip(RegModel1, x1=0, x2=0.3, col="red")
text(0.01,15,paste("r= 0.53","\n p-value=",format(signif(summary(RegModel1)$coefficients[2,4],3),scientific=T) ),pos=4, col="red", font=2)  


## Linear regression Single probe

RegModel.2 <- lm(X2Differentiel.freq~X2Distance.to.probe,data=Dataset)
summary(RegModel.2)
par(new=T)
#plot(X2Differentiel.freq~X2Distance.to.probe,data=Dataset,  xlab = "Genetic distance to probe",  ylab = "Frequency differential",
# pch=16 ,col="blue", xlim=c(0,0.3),ylim=c(-15, 33), cex.axis=1.2 , cex.lab=1.5)   
#text(0.23,15,paste("r� =",signif(summary(RegModel.2)$r.squared,3),"\n p-value=",format(signif(summary(RegModel.2)$coefficients[2,4],3),scientific=T) ),pos=4, col="blue", font=2)  
#ablineclip(RegModel.2, x1=0.2, x2=0.27, col="blue")
#legend('topright', c("Single probe","Silurifom probes"), col=c("blue","red"), lty=1,lwd=3, bty='o') 

plot(X2Differentiel.freq~X2Distance.to.probe,data=Dataset,  xlab = "Genetic distance to probe",  ylab = "Frequency differential",
 pch=16 ,col="blue", xlim=c(0,0.3),ylim=c(-15, 33), cex.axis=1.2 , cex.lab=1.5)   
text(0.23,15,paste("r= 0.19","\n p-value=",format(signif(summary(RegModel.2)$coefficients[2,4],3),scientific=T) ),pos=4, col="blue", font=2)  
ablineclip(RegModel.2, x1=0.2, x2=0.27, col="blue")
legend('topright', c("Single probe","Silurifom probes"), col=c("blue","red"), lty=1,lwd=3, bty='o') 

title((main="Regression of frequency differential by distance to probe" ))
 
 dev.off() 
# Linear regression remove outliers:
#Dataset <- read.table("clipboard", header=TRUE, sep="", na.strings="NA", dec=",", strip.white=TRUE) 
#M2 <- lm(height ~ bodymass, subset=(1:length(height)!=6))
#RegModel2 <- lm(Dataset$X1Differentiel.freq~Dataset$X1Distance.to.probe, subset=(1:36)[-19][-17][-11]) 
#
#summary(RegModel2)
#layout(matrix(1:4,2,2))
#plot(RegModel2)

-----------------------------------------------------------------
 # FIGURE 2 -------RAREFACTION CURVES--------------
-----------------------------------------------------------------
 
# Draw rerafaction curves     : http://www.fromthebottomoftheheap.net/2015/04/16/drawing-rarefaction-curves-with-custom-colours/
## after threshold value 
install.packages("vegan")
library(vegan)
par(mfrow=c(1,1),cex.axis =1.2,cex.main=1.5, cex.lab=1.4,oma=c(0,0,0,0),mar=c(5,5,4,2))
  ## input file format:
#Data =
#species         : Sp1 sp2 sp3 �.
#number of reads : 10  25   2�..
  ## import dataset ne pas importer la colonne contenant les noms de ligne
Dataset <- read.table("clipboard", header=TRUE, sep="", na.strings="NA", dec=",", strip.white=TRUE)
raremax <- min(rowSums(Dataset))
raremax
col <- c("blue", "red", "forestgreen", "orange", "blue", "yellow", "hotpink")
lty <- c("solid")
pars <- expand.grid(col = col, lty = lty,lwd=3, stringsAsFactors = FALSE)
head(pars)
tiff("Figure4.tiff", width = 4800, height = 4800,res = 600,compression = 'lzw') 
out <- with(pars[1:2, ],rarecurve(Dataset,yaxt="n", col = col,lty = lty, lwd =lwd , main="Rarefaction curve of the Mock samples", xlab="Number of COI barcode assigned per sample", ylab="Species number",label = FALSE,xlim=c(-500,5000),ylim=c(0,37), cex.sub=1.2))

legend('bottomright', c("Single probe","Silurifom probes"), col=c("blue","red"), lty=1,lwd=3, bty='o', inset=0.15)

 ## add segments
segments(5000, 0,5000, 35.6, col= 'blue')
segments(-1000,25,2000,25, col= 'red')
segments(-1000,35.6,5000, 35.6, col= 'blue') 
segments(2000, 0,2000, 25, col= 'red')
##Add y labels
x<-c(0,5,10,15,20,25,30,35)
axis(2, at=x,labels=x,las=2) 

dev.off()
 ## change y label to %
 ## y<-c('0%','25%','50%','75%','100%')
 ## x<-c(0,9,18,25,36)
 ## axis(2, at=x,labels=y,las=2) 

 ## export data : doit se faire en fois une pour sonde danio, une pour siluriform, permet d'identifier combien d'espece sont identifie pour un nombre de COI donn�
out1 <- with(pars[1:2, ],rarecurve(Dataset[1,], col = col,lty = lty, lwd =lwd , main="Rarefaction curve", xlab="Number of COI barcode assigned per sample", ylab="Species number", label = FALSE,xlim=c(0,6000)))
out2 <- with(pars[1:2, ],rarecurve(Dataset[2,], col = col,lty = lty, lwd =lwd , main="Rarefaction curve", xlab="Number of COI barcode assigned per sample", ylab="Species number", label = FALSE,xlim=c(0,6000)))
write.csv(out1, "C:/Users/mariac/Desktop/Dataset-sil.txt")
write.csv(out2, "C:/Users/mariac/Desktop/Dataset-danio.txt")

-----------------------------------------------------------------
# Calculate MaxSSS // ROC CURVES --------------------------
-----------------------------------------------------------------

#http://duclert.org/r-apprentissage/courbes-ROC-R.php
#(https://stackoverflow.com/questions/35731526/calculate-the-optimal-max-sensitivity-and-specificity-cut-off-value-using-r))
library(ROCR)
# input file : the Sanger variable should be set to 0 or 1. Run should be done separatly for Napo and Maranon and also MockSD and MockSSil
Binary <- read.table("clipboard", header=TRUE, sep="", na.strings="NA", dec=",", strip.white=TRUE)
str(Binary)
pred <- prediction(Binary$Mock.SD,Binary$SANGER)    ## convert data in ROCR format
pred

## Performance analysis on tpr, fpr, sensitivity and specificity:
###not used## Mock.SD : for exemple to convert % into number for TPR et FPR , should be multiply by 36 (TP)et 43 (FP)
###not used## cutoffs1 <- data.frame(cut=perf1@alpha.values[[1]], fpr=perf1@x.values[[1]]*5, tpr=perf1@y.values[[1]]*36) 

perf1 <- performance(pred, "tpr", "fpr")
cutoffs1 <- data.frame(cut=perf1@alpha.values[[1]], fpr=perf1@x.values[[1]], tpr=perf1@y.values[[1]])
cutoffs1
perf2<- performance(pred,  "sens", "spec")
cutoffs2 <- data.frame(cut=perf2@alpha.values[[1]], specificity=perf2@x.values[[1]], sensitivity=perf2@y.values[[1]], SSS=(perf2@x.values[[1]]+ perf2@y.values[[1]]))
all<- merge(cutoffs1,cutoffs2)
all
 
# ROC curves
pred <- prediction(pred,Binary$SANGER)
pred
roc <- performance(pred, "tpr", "fpr") 
roc
plot(roc, colorize=T)
abline(a=0,b=1)
#Identify the 'optimal' cutoff (MAXSSS)that yields the highest sensitivity and specificity: 
## positif si test >= a cette vakleur seuil CP, on se fixe cette valeur comme seuil (>=)
#CP<-perf2@alpha.values[[1]][which.max(perf2@x.values[[1]]+perf2@y.values[[1]])]
#perf3 <- performance(pred, "acc")
#perf4 <- performance(pred, "auc")
#plot(Sens.model.RM, type="l", col="red",xlab="",ylab="")
#par(new=TRUE)
#plot(Spec.model.RM, type="l", col="blue", xlab="Probability cutoff (threshold)",ylab="Sensitivity/Specificity")


-----------------------------------------------------------------------
##------------------ DIVERS  ---------------------------------------
-----------------------------------------------------------------------
## convert fastq to fasta
awk 'NR % 4 == 1 {print ">" $0 } NR % 4 == 2 {print $0}' my.fastq > my.fasta

-----------------------------------------------------------------------
##replace using string list            --------------------------------
-----------------------------------------------------------------------

grep -oP '\[\K[^\]]+' mini.tre
while read -r pattern replacement; do sed -i "s/$pattern/$replacement/" file ; done < patterns-replacement.txt

# file format for pattern replacement
$pattern	$replacement
Sternopygus	1495
Eigenmannia	1496
Sternopygidae	1497
Brachyhypopomus	1498
Hypopomidae	1499
Rhamphichthys	1500
Gymnorhamphichthys	1501
Hypopygus	1502
Steatogenys	1503
Rhamphichthyidae	1504
Sternarchorhynchus	1505


# R graphe density plot
#Megan : select Amazonian orders then uncollapse subtree. Select leaves aboves, export csv taxon to seqIDS. Under Excel, sort IDS on column 1 and remove redundancy.
##(7 orders = 2160 species COI barcodes ), compute genetique distance with danio rerio COI probe with clustalw2. Import with Genious and export in fasta format (keep alignment) and select"-" for gap.
##Import with MEGA7, save under MEGA project. Compute JC distances. Export matrix in column.
#  ##  plot
#densityPlot(Genetic.distance~Probe, data=subset(Dataset, subset=Genetic.distance<0.4) , bw="SJ", adjust=1, kernel="gaussian",xlab="Genetic distances", grid=F, legend=FALSE, lty=c(1,2),cex.lab=1.2, cex.sub=1.2)
#title(main="main title")
#densityPlot(Genetic.distance~Probe, data=subset(Dataset, subset=(Genetic.distance<0.4 & order=="Siluriformes")), bw="SJ", adjust=1, kernel="gaussian",xlab="Genetic distances", grid=F, legend=FALSE, lty=c(1,2))

# ## title(main="toto")
#abline(v=c(0.266), col=c("red"), lty=c(1,2), lwd=c(1, 3))
   
   
------------------------------------------------------------------------------   
 
## Alignment of 444 COI amazonina fish species
# Clustalw2 under node4, file = 444-Ortega-Sarmiento-sp-uniq.fasta / option 1/4/2
output : 444-Ortega-Sarmiento-sp-uniq.aln
open with genious / export in mega project
open with MEGA7
compute pairwise distance distance : model = No. of diffrences, d: Trnasitions + transversions , Uniform rates , Gaps/ missing Datatreatment = Complete deletion
export in CSV
Compute stat to get sequence length / export to excel

 # change data.jar in MALT DB for assignation  / Built index with new DB
# copy data.jar : /usr/local/MALT-xxx/jars
# extract data.jar
jar xf data.jar
# supprimer data.jar
# Replace files .map .tre .lvl .info in the repertory with the modified on in /resources/files/ par ceux modifi�s (LAST)

Input files = ncbi-18042018.map ncbi-18042018.tre ncbi-18042018.info ncbi-18042018.lvl
But renamed without -18042014
# Create new archive .jar Move in the folder containing META-INF and ressources.) a mettre dans la nouvelle archive data.jar
jar cfv data.jar *
move data.jar to /usr/local/MALT-0.4-mariac/jars
# change properties data.jar en droits 755

# buid ref MALT
/data2/projects/pimelo-larvamaz/MALT-0.3.8/malt-build -i NCBI-COI-bonyfish-09042017-include-additionnal-COI.fasta  -d index-Article-Danio --sequenceType DNA --classify Taxonomy

# MALT on subset of enriched library
awk 'NR % 4 == 1 {print ">" $0 } NR % 4 == 2 {print $0}' R50T1-R1R2.fastq > R50T1-R1R2.fasta
head -n 200000 R50T1-R1R2.fasta > subset-R50T1-R1R2.fasta

qsub MALT-308.sh
#   for i in `ls subset-R50T1-R1R2.fastq`; do /data2/projects/pimelo-larvamaz/MALT-0.3.8/malt-run -m BlastN -f Text -at SemiGlobal -i $i -o $i-SG.rma -a $i-SG.blastn --index /data2/projects/pimelo-larvamaz/MALT-0.3.8/index-Article-Danio ; done

open blastn result in megan and extract no hits and notassigned for a blastn on NCBI DB (cluster)

## accurancy vs ref seq length
# extraction 444 amazoninan COI from   DB-COI-16032018-v5.fasta
#cat list-444-amazonian-species.txt | xargs -I{} grep -m 1 -A1 -w {} in.fasta > out.fasta

# shearing / hash   (x =50, 100, 140, 250, full length)
simuReads "x" 10 444-amazonian-species-Ortega-Sarmiento-sp-uniq.fasta > shearingx-444-amazonian-species-Ortega-Sarmiento-sp-uniq.fasta
# MALT built index database
/data2/projects/pimelo-larvamaz/MALT-0.3.8/malt-build -i NCBI-COI-bonyfish-09042017-include-additionnal-COI.fasta  -d index-Article-Danio --sequenceType DNA --classify Taxonomy
# MALT-run
qsub MALT-317.sh

for i in `ls shearing*`; do /data2/projects/pimelo-larvamaz/MALT-0.3.8/malt-run -m BlastN -f Text -i $i -o $i.rma -a $i.blastn --index /data2/projects/pimelo-larvamaz/MALT-0.3.8/index-Article-Danio ; done

# MEGAN import blastn.gz file, using tre and map in C:\Users\mariac\Documents\Documents\ACEDRIC\Programmes\PIMELO-et-ECOBIO\Article Danio 2018\DB MALT et MEGAN\Index-Article-D\Check shearing + synonym file 

# compute sequence length in fasta file
perl sequence-length.py *.fasta
    
## BLASTn not assigned and no hits reads on genebank DB ##############
NCBI Database used = NT
reads extracted from library MARMock-SD (R50T1)

qsub -cwd -b Y -l hostname=node3 -pe ompi 8 -V -N blastn  "blastn -db /data/projects/banks/NT/nt -query /data2/projects/pimelo-larvamaz/Article-Danio/Megan-on-R1+R2-file/chech-not-assigned-no-hits27052018/reads-No_hits.fasta -out reads-No_hits.fasta.blastn-NR.out"

qsub -cwd -b Y -l hostname=node3 -pe ompi 8 -V -N blastn  "blastn -db /data/projects/banks/NT/nt -query /data2/projects/pimelo-larvamaz/Article-Danio/Megan-on-R1+R2-file/chech-not-assigned-no-hits27052018/reads-Not_assigned.fasta -out reads-Not_assigned.fasta.blastn-NR.out"
      
#  pi value on sliddding window
from genious export alignment to fasta format
from DNAsp : Unfold a Fasta file with ambiguity codes, save as ...
DNA polymorphism : window 10 step 2
