# Supplementary material for: Metabarcoding by capture using a single COI probe (MCSP) to identify and quantify fish species in ichthyoplankton swarms
Source: PLoS One. 2018 Sep 12;13(9):e0202976. doi: 10.1371/journal.pone.0202976 (PMC6135497; doi:10.1371/journal.pone.0202976)
Supplement: S2 Table — (XLSX) [file pone.0202976.s004.xlsx]

## Sheet: Feuil1
Site	Sample	Number of larvae	Sanger	Number of NGS reads	Number of hit on COI database (%)	Assigned reads (%)	X-fold enrichment *
Napo	Mock	102	102	606614	7,356 (1.2)	4,112 (0.7)	103.147
	Bulk	250		1151458	8,168 (0.7)	5,595 (0.5)	60.3387
Marañon	Mock	270	269	1390050	4,861 (0.3)	2,530 (0.2)	29.7456
	Bulk	373		1528996	5,389 (0.4)	2,888 (0.2)	29.9799
