# Supplementary material for: Metabarcoding by capture using a single COI probe (MCSP) to identify and quantify fish species in ichthyoplankton swarms
Source: PLoS One. 2018 Sep 12;13(9):e0202976. doi: 10.1371/journal.pone.0202976 (PMC6135497; doi:10.1371/journal.pone.0202976)
Supplement: S2 Text — (FASTA) [file pone.0202976.s002.fasta]

>gi|1145991323|gb|KY349109.1| Trichopsis vittata voucher NRM:69220 cytochrome oxidase subunit I (COI) gene, partial cds; mitochondrial
CCTTTATCTAGTTTCGGTGCTTGAGCCGGAATAGTGGGTACTGCTTTAAGCCTACTAATCCGTGCAGAACTAAGTCAGCCCGGAGCTCTTCTTGGAGACGACCAAATTTATAATGTAATCGTAACAGCACATGCTTTCGTAATAATTTTCTTTATAGTAATGCCAGTTATAATTGGAGGTTTTGGAAACTGATTAGTCCCACTTATAATTGGTGCACCAGACATGGCATTCCCTCGAATAAACAATATAAGTTTTTGACTACTGCCCCCTTCTTTCCTGCTACTACTAGCATCCTCCGGTGTTGAAGCAGGAGCCGGAACAGGTTGAACCGTGTACCCTCCTTTAGCCAGCAACCTAGCTCATGCAGGTGCCTCCGTTGATTTAACAATTTTTTCTCTACATCTAGCAGGTGTCTCTTCAATTTTAGGAGCTATCAATTTTATTACCACTATTATTAACATAAAACCCCCTGCCATCTCTCAATATCAGACGCCTCTTTTCGTATGAGCAGTATTAATTACAGCCGTACTACTTTTATTATCACTTCCAGTATTAGCTGCTGGAATTACAATACTGCTAACAGATCGCAATCTAAATACCACTTTCTTTGACCCAGCCGGAGGGGGGGATCCAATTTTATATCAACACCTATTT
>gi|1145139733|gb|KY319900.1| Poropuntius bolovenensis voucher SUC0312.03 cytochrome c oxidase subunit I (COI) gene, complete cds; mitochondrial
GTGGCAATCACGCGCTGATTCTTCTCTACTAACCACAAAGACATTGGTACCCTTTATCTTGTATTTGGTGCCTGAGCCGGAATAGTAGGAACCGCCTTAAGCCTTCTTATTCGGGCTGAACTTAGCCAACCCGGATCACTTCTAGGTGATGACCAAATTTATAACGTCATCGTTACCGCCCACGCCTTTGTAATAATTTTCTTTATAGTAATGCCTATCCTCATTGGAGGATTTGGGAACTGACTCGTGCCACTAATAATCGGAGCCCCAGACATAGCATTTCCACGAATAAATAACATAAGCTTTTGACTACTGCCCCCATCATTTCTGCTATTATTAGCCTCCTCTGGTGTTGAAGCTGGAGCTGGAACAGGGTGAACAGTATACCCACCTCTTGCAGGAAATCTGGCCCATGCAGGAGCATCAGTAGACCTGACAATTTTCTCGCTCCACTTAGCAGGTGTGTCATCAATTTTAGGTGCAATTAATTTTATTACCACAACTATTAACATGAAACCTCCAGCCATCTCCCAATATCAAACACCACTATTTGTCTGATCCGTGCTTGTAACCGCTGTATTACTCCTCCTATCATTACCTGTTTTAGCTGCCGGAATTACAATACTACTAACAGACCGAAACCTTAATACCACTTTCTTTGACCCAGCAGGTGGAGGAGACCCAATCCTTTACCAACACCTATTCTGATTCTTTGGGCACCCGGAAGTCTATATTCTTATTCTCCCGGGATTCGGAATTATTTCCCACGTCGTAGCCTACTACTCAGGTAAAAAAGAACCATTTGGTTATATAGGAATAGTTTGAGCCATAATGGCCATCGGCCTTCTAGGATTTATCGTATGGGCCCACCACATATTCACTGTTGGAATAGACGTAGACACTCGTGCATACTTCACATCTGCGACAATAATTATTGCAATTCCAACAGGTGTAAAAGTATTCAGCTGACTAGCCACACTTCACGGAGGGTCTATTAAATGAGAAACACCTATGCTATGGGCCCTAGGATTTATTTTCCTGTTCACAGTAGGTGGTTTAACAGGAATCGTCCTATCCAACTCATCACTAGACATTGTCCTTCATGACACCTATTATGTAGTTGCGCATTTCCACTATGTACTATCAATAGGTGCCGTATTCGCCATTATAGCAGCTTTCGTACACTGATTCCCCCTATTAACCGGATATACCCTACACAGCGCCTGAACAAAAATCCACTTTGCGGTTATGTTTATTGGGGTCAACCTCACATTCTTCCCACAACACTTCCTAGGCCTAGCAGGCATGCCACGACGATATTCTGACTACCCAGACGCCTACGCCCTGTGAAATACAGTATCATCTATTGGGTCACTAATCTCTTTAGTAGCAGTAATCATGTTCCTATTTATTCTATGAGAAGCCTTCGCCGCTAAACGGGAAGTACTATCCGTAGAACTAACAATAACAAATGTAGAATGACTTCACGGCTGCCCTCCCCCTTACCACACATACGAAGAACCAGCATTCGTACAAATTCAATCAAATTAA
>gi|1145139735|gb|KY319901.1| Poropuntius bolovenensis voucher SUC0312.04 cytochrome c oxidase subunit I (COI) gene, complete cds; mitochondrial
GTGGCAATCACGCGCTGATTCTTCTCTACTAACCACAAAGACATTGGTACCCTTTATCTTGTATTTGGTGCCTGAGCCGGAATAGTAGGAACCGCCTTAAGCCTTCTTATTCGGGCTGAACTTAGCCAACCCGGATCACTTCTAGGTGATGACCAAATTTATAACGTCATCGTTACCGCCCACGCCTTTGTAATAATTTTCTTTATAGTAATGCCTATCCTCATTGGAGGATTTGGGAACTGACTCGTGCCACTAATAATCGGAGCCCCAGACATAGCATTTCCACGAATAAATAACATAAGCTTTTGACTACTGCCCCCATCATTTCTGCTATTATTAGCCTCCTCTGGTGTTGAAGCTGGAGCTGGAACAGGGTGAACAGTATACCCACCTCTTGCAGGAAATCTGGCCCATGCAGGAGCATCAGTAGACCTGACAATTTTCTCGCTCCACTTAGCAGGTGTGTCATCAATTTTAGGTGCAATTAATTTTATTACCACAACTATTAACATGAAACCTCCAGCCATCTCCCAATATCAAACACCACTATTTGTCTGATCCGTGCTTGTAACCGCTGTATTACTCCTCCTATCATTACCTGTTTTAGCTGCCGGAATTACAATACTACTAACAGACCGAAACCTTAATACCACTTTCTTTGACCCAGCAGGTGGAGGAGACCCAATCCTTTACCAACACCTATTCTGATTCTTTGGGCACCCGGAAGTCTATATTCTTATTCTCCCGGGATTCGGAATTATTTCCCACGTCGTAGCCTACTACTCAGGTAAAAAAGAACCATTTGGTTATATAGGAATAGTTTGAGCCATAATGGCCATCGGCCTTCTAGGATTTATCGTATGGGCCCACCACATATTCACTGTTGGAATAGACGTAGACACTCGTGCATACTTCACATCTGCGACAATAATTATTGCAATTCCAACAGGTGTAAAAGTATTCAGCTGACTAGCCACACTTCACGGAGGGTCTATTAAATGAGAAACACCTATGCTATGGGCCCTAGGATTTATTTTCCTGTTCACAGTAGGTGGTTTAACAGGAATCGTCCTATCCAACTCATCACTAGACATTGTCCTTCATGACACCTATTATGTAGTTGCGCATTTCCACTATGTACTATCAATAGGTGCCGTATTCGCCATTATAGCAGCTTTCGTACACTGATTCCCCCTATTAACCGGATACACCCTACACAACGCCTGAACAAAAATCCACTTTGCGGTTATGTTTATTGGGGTCAACCTCACATTCTTCCCACAACACTTCCTAGGCCTAGCAGGCATGCCACGACGATATTCTGACTATCCAGACGCCTACGCCCTGTGAAATACAGTATCATCTATTGGGTCACTAATCTCTTTAGTAGCAGTAATCATGTTCCTATTTATTCTATGAGAAGCCTTCGCCGCTAAACGGGAAGTACTATCCGTAGAACTAACAATAACAAATGTAGAATGACTTCACGGCTGCCCTCCCCCTTACCACACATACGAAGAACCAGCATTCGTACAAATTCAATCAAATTAA
>gi|1145139737|gb|KY319902.1| Poropuntius bolovenensis voucher SUC0312.05 cytochrome c oxidase subunit I (COI) gene, complete cds; mitochondrial
GTGGCAATCACGCGCTGATTCTTCTCTACTAACCACAAAGACATTGGTACCCTTTATCTTGTATTTGGTGCCTGAGCCGGAATAGTAGGAACCGCCTTAAGCCTTCTTATTCGGGCTGAACTTAGCCAACCCGGATCACTTCTAGGTGATGACCAAATTTATAACGTCATCGTTACCGCCCACGCCTTTGTAATAATTTTCTTTATAGTAATGCCTATCCTCATTGGAGGATTTGGGAACTGACTCGTGCCACTAATAATCGGAGCCCCAGACATAGCATTTCCACGAATAAATAACATAAGCTTTTGACTACTGCCCCCATCATTTCTGCTATTATTAGCCTCCTCTGGTGTTGAAGCTGGAGCTGGAACAGGGTGAACAGTATACCCACCTCTTGCAGGAAATCTGGCCCATGCAGGAGCATCAGTAGACCTGACAATTTTCTCGCTCCACTTAGCAGGTGTGTCATCAATTTTAGGTGCAATTAATTTTATTACCACAACTATTAACATGAAACCTCCAGCCATCTCCCAATATCAAACACCACTATTTGTCTGATCCGTGCTTGTAACCGCTGTATTACTCCTCCTATCATTACCTGTTTTAGCTGCCGGAATTACAATACTACTAACAGACCGAAACCTTAATACCACTTTCTTTGACCCAGCAGGTGGAGGAGACCCAATCCTTTACCAACACCTATTCTGATTCTTTGGGCACCCGGAAGTCTATATTCTTATTCTCCCGGGATTCGGAATTATTTCCCACGTCGTAGCCTACTACTCAGGTAAAAAAGAACCATTTGGTTATATAGGAATAGTTTGAGCCATAATGGCCATCGGCCTTCTAGGATTTATCGTATGGGCCCACCACATATTCACTGTTGGAATAGACGTAGACACTCGTGCATACTTCACATCTGCGACAATAATTATTGCAATTCCAACAGGTGTAAAAGTATTCAGCTGACTAGCCACACTTCACGGAGGGTCTATTAAATGAGAAACACCTATGCTATGGGCCCTAGGATTTATTTTCCTGTTCACAGTAGGTGGTTTAACAGGAATCGTCCTATCCAACTCATCACTAGACATTGTCCTTCATGACACCTATTATGTAGTTGCGCATTTCCACTATGTACTATCAATAGGTGCCGTATTCGCCATTATAGCAGCTTTCGTACACTGATTCCCCCTATTAACCGGATACACCCTACACAGCGCCTGAACAAAAATCCACTTTGCGGTTATGTTTATTGGGGTCAACCTCACATTCTTCCCACAACACTTCCTAGGCCTAGCAGGCATGCCACGGCGATATTCTGACTATCCAGACGCCTACGCCCTGTGAAATACAGTATCATCTATTGGGTCACTAATCTCTTTAGTAGCAGTAATCATGTTCCTATTTATTCTATGAGAAGCCTTCGCCGCTAAACGGGAAGTACTATCCGTAGAACTAACAATAACAAATGTAGAATGACTTCACGGCTGCCCTCCCCCTTACCACACATACGAAGAACCAGCATTCGTACAAATTCAATCAAATTAA
>gi|1145139739|gb|KY319903.1| Poropuntius bolovenensis voucher SUC0328.8 cytochrome c oxidase subunit I (COI) gene, complete cds; mitochondrial
GTGGCAATCACGCGCTGATTCTTCTCTACTAACCACAAAGACATTGGTACCCTTTATCTTGTATTTGGTGCCTGAGCCGGAATAGTAGGAACCGCCTTAAGCCTTCTTATTCGGGCTGAACTTAGCCAACCCGGATCACTTCTAGGTGATGACCAAATTTATAACGTCATCGTTACCGCCCACGCCTTTGTAATAATTTTCTTTATAGTAATGCCTATCCTCATTGGAGGATTTGGGAACTGACTCGTGCCACTAATAATCGGAGCCCCAGACATAGCATTTCCACGAATAAATAACATAAGCTTTTGACTACTGCCCCCATCATTTCTACTATTATTAGCCTCCTCTGGTGTTGAAGCTGGAGCTGGAACAGGGTGAACAGTATACCCACCTCTTGCAGGAAATCTGGCCCATGCAGGAGCATCAGTAGACCTGACAATTTTCTCGCTCCACTTAGCAGGTGTGTCATCAATTTTAGGTGCAATTAATTTTATTACCACAACTATTAACATGAAACCTCCAGCCATCTCCCAATATCAAACACCACTATTTGTCTGATCCGTGCTTGTAACCGCTGTATTACTCCTCCTATCATTACCTGTTTTAGCTGCCGGAATTACAATACTACTAACAGACCGAAACCTTAATACCACTTTCTTTGACTCAGCAGGTGGAGGAGACCCAATCCTTTACCAACACCTATTCTGATTCTTTGGGCACCCGGAAGTCTATATTCTTATTCTCCCGGGATTCGGAATTATTTCCCACGTCGTAGCCTACTACTCAGGTAAAAAAGAACCATTTGGTTATATAGGAATAGTTTGAGCCATAATGGCCATCGGCCTTCTAGGATTTATCGTATGGGCCCACCACATATTCACTGTTGGAATAGACGTAGACACTCGTGCATACTTCACATCTGCGACAATAATTATTGCAATTCCAACAGGTGTAAAAGTATTCAGCTGACTAGCCACACTTCACGGAGGGTCTATTAAATGAGAAACACCTATGCTATGGGCCCTAGGATTTATTTTCCTGTTCACAGTAGGTGGTTTAACAGGAATCGTCCTATCCAACTCATCACTAGACATTGTCCTTCATGACACCTATTATGTAGTTGCGCATTTCCACTATGTACTATCAATAGGTGCCGTATTCGCCATTATAGCAGCTTTCGTACACTGATTCCCCCTATTAACCGGATATACCCTACACAGCGCCTGAACAAAAATCCACTTTGCGGTTATGTTTATTGGGGTCAACCTCACATTCTTCCCACAACACTTCCTAGGCCTAGCAGGCATGCCACGACGATATTCTGACTACCCAGACGCCTACGCCCTGTGAAATACAGTATCATCTATTGGGTCACTAATCTCTTTAGTAGCAGTAATCATGTTCCTATTTATTCTATGAGAAGCCTTCGCCGCTAAACGGGAAGTACTATCCGTAGAACTAACAATAACAAATGTAGAATGACTTCACGGCTGCCCTCCCCCTTACCACACATACGAAGAACCAGCATTCGTACAAATTCAATCAAATTAA
>gi|1145139741|gb|KY319904.1| Poropuntius bolovenensis voucher SUC0328.9 cytochrome c oxidase subunit I (COI) gene, complete cds; mitochondrial
GTGGCAATCACGCGCTGATTCTTCTCTACTAACCACAAAGACATTGGTACCCTTTATCTTGTATTTGGTGCCTGAGCCGGAATAGTAGGAACCGCCTTAAGCCTTCTTATTCGGGCTGAACTTAGCCAACCCGGATCACTTCTAGGTGATGACCAAATTTATAACGTCATCGTTACCGCCCACGCCTTTGTAATAATTTTCTTTATAGTAATGCCTATCCTCATTGGAGGATTTGGGAACTGACTCGTGCCACTAATAATCGGAGCCCCAGACATAGCATTTCCACGAATAAATAACATAAGCTTTTGACTACTGCCCCCATCATTTCTGCTATTATTAGCCTCCTCTGGTGTTGAAGCTGGAGCTGGAACAGGGTGAACAGTATACCCACCTCTTGCAGGAAATCTGGCCCATGCAGGAGCATCAGTAGACCTGACAATTTTCTCGCTCCACTTAGCAGGTGTGTCATCAATTTTAGGTGCAATTAATTTTATTACCACAACTATTAACATGAAACCTCCAGCCATCTCCCAATATCAAACACCACTATTTGTCTGATCCGTGCTTGTAACCGCTGTATTACTCCTCCTATCATTACCTGTTTTAGCTGCCGGAATTACAATACTACTAACAGACCGAAACCTTAATACCACTTTCTTTGACCCAGCAGGTGGAGGAGACCCAATCCTTTACCAACACCTATTTTGATTCTTTGGGCACCCGGAAGTCTATATTCTTATTCTCCCGGGATTCGGAATTATTTCCCACGTCGTAGCCTACTACTCAGGTAAAAAAGAACCATTTGGTTATATAGGAATAGTTTGAGCCATAATGGCCATCGGCCTTCTAGGATTTATCGTATGGGCCCACCACATATTCACTGTTGGAATAGACGTAGACACTCGTGCATACTTCACATCTGCGACAATAATTATTGCAATTCCAACAGGTGTAAAAGTATTCAGCTGACTAGCCACACTTCACGGAGGGTCTATTAAATGAGAAACACCTATGCTATGGGCCCTAGGATTTATTTTCCTGTTCACAGTAGGTGGTTTAACAGGAATCGTCCTATCCAACTCATCACTAGACATTGTCCTTCATGACACCTATTATGTAGTTGCGCATTTCCACTATGTACTATCAATAGGTGCCGTATTCGCCATTATAGCAGCTTTCGTACACTGATTCCCCCTATTAACCGGATATACCCTACACAGCGCCTGAACAAAAATCCACTTTGCGGTTATGTTTATTGGGGTCAACCTCACATTCTTCCCACAACACTTCCTAGGCCTAGCAGGCATGCCACGACGATATTCTGACTACCCAGACGCCTACGCCCTGTGAAATACAGTATCATCTATTGGGTCACTAATCTCTTTAGTAGCAGTAATCATGTTCCTATTTATTCTATGAGAAGCCTTCGCCGCTAAACGGGAAGTACTATCCGTAGAACTAACAATAACAAATGTAGAATGACTTCACGGCTGCCCTCCCCCTTACCACACATACGAAGAACCAGCATTCGTACAAATTCAATCAAATTAA
>gi|1145139743|gb|KY319905.1| Poropuntius bolovenensis voucher SUC0328.10 cytochrome c oxidase subunit I (COI) gene, complete cds; mitochondrial
GTGGCAATCACGCGCTGATTCTTCTCTACTAACCACAAAGACATTGGTACCCTTTATCTTGTATTTGGTGCCTGAGCCGGAATAGTAGGAACCGCCTTAAGCCTTCTTATTCGGGCTGAACTTAGCCAACCCGGATCACTTCTAGGTGATGACCAAATTTATAACGTCATCGTTACCGCCCACGCCTTTGTAATAATTTTCTTTATAGTAATGCCTATCCTCATTGGAGGATTTGGGAACTGACTCGTGCCACTAATAATCGGAGCCCCAGACATAGCATTTCCACGAATAAATAACATAAGCTTTTGACTACTGCCCCCATCATTTCTGCTATTATTAGCCTCCTCTGGTGTTGAAGCTGGAGCTGGAACAGGGTGAACAGTATACCCACCTCTTGCAGGAAATCTGGCCCATGCAGGAGCATCAGTAGACCTGACAATTTTCTCGCTCCACTTAGCAGGTGTGTCATCAATTTTAGGTGCAATTAATTTTATTACCACAACTATTAACATGAAACCTCCAGCCATCTCCCAATATCAAACACCACTATTTGTCTGATCCGTGCTTGTAACCGCTGTATTACTCCTCCTATCATTACCTGTTTTAGCTGCCGGAATTACAATACTACTAACAGACCGAAACCTTAATACCACTTTCTTTGACCCAGCAGGTGGAGGAGACCCAATCCTTTACCAACACCTATTCTGATTCTTTGGGCACCCGGAAGTCTATATTCTTATTCTCCCGGGATTCGGAATTATTTCCCACGTCGTAGCCTACTACTCAGGTAAAAAAGAACCATTTGGTTATATAGGAATAGTTTGAGCCATAATGGCCATCGGCCTTCTAGGATTTATCGTATGGGCCCACCACATATTCACTGTTGGAATAGACGTAGACACTCGTGCATACTTCACATCTGCGACAATAATTATTGCAATTCCAACAGGTGTAAAAGTATTCAGCTGACTAGCCACACTTCACGGAGGGTCTATTAAATGAGAAACACCTATGCTATGGGCCCTAGGATTTATTTTCCTGTTCACAGTAGGTGGTTTAACAGGAATCGTCCTATCCAACTCATCACTAGACATTGTCCTTCATGACACCTATTATGTAGTTGCGCATTTCCACTATGTACTATCAATAGGTGCCGTATTCGCCATTATAGCAGCTTTCGTACACTGATTCCCCCTATTAACCGGATATACCCTACACAGCGCCTGAACAAAAATCCACTTTGCGGTTATGTTTATTGGGGTCAACCTCACATTCTTCCCACAACACTTCCTAGGCCTAGCAGGCATGCCACGACGATATTCTGACTACCCAGACGCCTACGCCCTGTGAAATACAGTATCATCTATTGGGTCACTAATCTCTTTAGTAGCAGTAATCATGTTCCTATTTATTCTATGAGAAGCCTTCGCCGCTAAACGGGAAGTACTATCCGTAGAACTAACAATAACAAATGTAGAATGACTTCACGGCTGCCCTCCCCCTTACCACACATACGAAGAACCAGCATTCGTACAAATTCAATCAAATTAA
>gi|1145139745|gb|KY319906.1| Poropuntius bolovenensis voucher SUC8764 cytochrome c oxidase subunit I (COI) gene, complete cds; mitochondrial
GTGGCAATCACGCGCTGATTCTTCTCTACTAACCACAAAGACATTGGTACCCTTTATCTTGTATTTGGTGCCTGAGCCGGAATAGTAGGAACCGCCTTAAGCCTTCTTATTCGGGCTGAACTTAGCCAACCCGGATCACTTCTAGGTGATGACCAAATTTATAACGTCATCGTTACCGCCCACGCCTTTGTAATAATTTTCTTTATAGTAATGCCTATCCTCATTGGAGGATTTGGGAACTGACTCGTGCCACTAATAATCGGAGCCCCAGACATAGCATTTCCACGAATAAATAACATAAGCTTTTGACTACTACCCCCATCATTTCTGCTATTATTAGCCTCCTCTGGTGTTGAAGCTGGAGCTGGAACAGGGTGAACAGTATACCCACCTCTTGCAGGAAATCTGGCCCATGCAGGAGCATCAGTAGACCTGACAATTTTCTCGCTCCACTTAGCAGGTGTGTCATCAATTTTAGGTGCAATTAATTTTATTACCACAACTATTAACATGAAACCTCCAGCCATCTCCCAATATCAAACACCACTATTTGTCTGATCCGTGCTTGTAACCGCTGTATTACTCCTCCTATCATTACCTGTTTTAGCTGCCGGAATTACAATACTACTAACAGACCGAAACCTTAATACCACTTTCTTTGACCCAGCAGGTGGAGGGGACCCAATCCTTTACCAACACCTATTCTGATTCTTTGGGCACCCGAAAGTTTATATTCTTATTCTCCCGGGATTCGGAATTATTTCCCACGTCGTAGCCTACTACTCAGGTAAAAAAGAACCATTTGGTTATATAGGAATAGTTTGAGCCATAATGGCCATCGGCCTTCTAGGATTTATCGTATGGGCCCACCACATATTCACTGTTGGAATAGACGTAGACACTCGTGCATACTTCACATCTGCGACAATAATTATTGCAATTCCAACAGGTGTAAAAGTATTCAGCTGACTAGCCACACTTCACGGAGGGTCTATTAAATGAGAAACACCTATGCTATGGGCCCTAGGATTTATTTTCCTGTTCACAGTAGGTGGTTTAACAGGAATCGTCCTATCCAACTCATCACTAGACATTGTCCTTCATGACACCTATTATGTAGTTGCGCATTTCCACTATGTATTATCAATAGGTGCCGTATTCGCCATTATAGCAGCTTTCGTACACTGATTCCCCCTATTAACCGGATATACCCTACACAGCGCCTGAACAAAAATCCACTTTGCGGTTATGTTTATTGGGGTCAACCTCACATTCTTCCCACAACACTTCCTAGGCCTAGCAGGCATGCCACGACGATATTCTGACTACCCAGACGCCTACGCCCTGTGAAATACAGTATCATCTATTGGGTCACTAATCTCTTTAGTAGCAGTAATCATGTTCCTATTTATTCTATGAGAAGCCTTCGCCGCTAAACGGGAAGTACTATCCGTAGAACTAACAATAACAAATGTAGAATGACTTCACGGCTGCCCTCCCCCTTACCACACATACGAAGAACCAGCATTCGTACAAATTCAATCAAATTAA
>gi|1145139747|gb|KY319907.1| Poropuntius bolovenensis voucher SUC8765 cytochrome c oxidase subunit I (COI) gene, complete cds; mitochondrial
GTGGCAATCACGCGCTGATTCTTCTCTACTAACCACAAAGACATTGGTACCCTTTATCTTGTATTTGGTGCCTGAGCCGGAATAGTAGGAACCGCCTTAAGCCTTCTTATTCGGGCTGAACTTAGCCAACCCGGATCACTTCTAGGTGATGACCAAATTTATAACGTCATCGTTACCGCCCACGCCTTTGTAATAATTTTCTTTATAGTAATGCCTATCCTCATTGGAGGATTTGGGAACTGACTCGTGCCACTAATAATCGGAGCCCCAGACATAGCATTTCCACGAATAAATAACATAAGCTTTTGACTACTGCCCCCATCATTTCTGCTATTATTAGCCTCCTCTGGTGTTGAAGCTGGAGCTGGAACAGGGTGAACAGTATACCCACCTCTTGCAGGAAATCTGGCCCATGCAGGAGCATCAGTAGACCTGACAATTTTCTCGCTCCACTTAGCAGGTGTGTCATCAATTTTAGGTGCAATTAATTTTATTACCACAACTATTAACATGAAACCTCCAGCCATCTCCCAATATCAAACACCACTATTTGTCTGATCCGTGCTTGTAACCGCTGTATTACTCCTCCTATCATTACCTGTTTTAGCTGCCGGAATTACAATACTACTAACAGACCGAAACCTTAATACCACTTTCTTTGACCCAGCAGGTGGAGGGGACCCAATCCTTTACCAACACCTATTCTGATTCTTTGGGCACCCGAAAGTTTATATTCTTATTCTCCCGGGATTCGGAATTATTTCCCACGTCGTAGCCTACTACTCAGGTAAAAAAGAACCATTTGGTTATATAGGAATAGTTTGAGCCATAATGGCCATCGGCCTTCTAGGATTTATCGTATGGGCCCACCACATATTCACTGTTGGAATAGACGTAGACACTCGTGCATACTTCACATCTGCGACAATAATTATTGCAATTCCAACAGGTGTAAAAGTATTCAGCTGACTAGCCACACTTCACGGAGGGTCTATTAAATGAGAAACACCTATGCTATGGGCCCTAGGATTTATTTTCCTGTTCACAGTAGGTGGTTTAACAGGAATCGTCCTATCCAACTCATCACTAGACATTGTCCTTCATGACACCTATTATGTAGTTGCGCATTTCCACTATGTATTATCAATAGGTGCCGTATTCGCCATTATAGCAGCTTTCGTACACTGATTCCCCCTATTAACCGGATATACCCTACACAGCGCCTGAACAAAAATCCACTTTGCGGTTATGTTTATTGGGGTCAACCTCACATTCTTCCCACAACACTTCCTAGGCCTAGCAGGCATGCCACGACGATATTCTGACTACCCAGACGCCTACGCCCTGTGAAATACAGTATCATCTATTGGGTCACTAATCTCTTTAGTAGCAGTAATCATGTTCCTATTTATTCTATGAGAAGCCTTCGCCGCTAAACGGGAAGTACTATCCGTAGAACTAACAATAACAAATGTAGAATGACTTCACGGCTGCCCTCCCCCTTACCACACATACGAAGAACCAGCATTCGTACAAATTCAATCAAATTAA
>gi|1145139749|gb|KY319908.1| Poropuntius bolovenensis voucher SUC8766 cytochrome c oxidase subunit I (COI) gene, complete cds; mitochondrial
GTGGCAATCACGCGCTGATTCTTCTCTACTAACCACAAAGACATTGGTACCCTTTATCTTGTATTTGGTGCCTGAGCCGGAATAGTAGGAACCGCCTTAAGCCTTCTTATTCGGGCTGAACTTAGCCAACCCGGATCACTTCTAGGTGATGACCAAATTTATAACGTCATCGTTACCGCCCACGCCTTTGTAATAATTTTCTTTATAGTAATGCCTATCCTCATTGGAGGATTTGGGAACTGACTCGTGCCACTAATAATCGGAGCCCCAGACATAGCATTTCCACGAATAAATAACATAAGCTTTTGACTACTGCCCCCATCATTTCTGCTATTATTAGCCTCCTCTGGTGTTGAAGCTGGAGCTGGAACAGGGTGAACAGTATACCCACCTCTTGCAGGAAATCTGGCCCATGCAGGAGCATCAGTAGACCTGACAATTTTCTCGCTCCACTTAGCAGGTGTGTCATCAATTTTAGGTGCAATTAATTTTATTACCACAACTATTAACATGAAACCTCCAGCCATCTCCCAATATCAAACACCACTATTTGTCTGATCCGTGCTTGTAACCGCTGTATTACTCCTCCTATCATTACCTGTTTTAGCTGCCGGAATTACAATACTACTAACAGACCGAAACCTTAATACCACTTTCTTTGACCCAGCAGGTGGAGGGGACCCAATCCTTTACCAACACCTATTCTGATTCTTTGGGCACCCGAAAGTTTATATTCTTATTCTCCCGGGATTCGGAATTATTTCCCACGTCGTAGCCTACTACTCAGGTAAAAAAGAACCATTTGGTTATATAGGAATAGTTTGAGCCATAATGGCCATCGGCCTTCTAGGATTTATCGTATGGGCCCACCACATATTCACTGTTGGAATAGACGTAGACACTCGTGCATACTTCACATCTGCGACAATAATTATTGCAATTCCAACAGGTGTAAAAGTATTCAGCTGACTAGCCACACTTCACGGAGGGTCTATTAAATGAGAAACACCTATGCTATGGGCCCTAGGATTTATTTTCCTGTTCACAGTAGGTGGTTTAACAGGAATCGTCCTATCCAACTCATCACTAGACATTGTCCTTCATGACACCTATTATGTAGTTGCGCATTTCCACTATGTATTATCAATAGGTGCCGTATTCGCCATTATAGCAGCTTTCGTACACTGATTCCCCCTATTAACCGGATATACCCTACACAGCGCCTGAACAAAAATCCACTTTGCGGTTATGTTTATTGGGGTCAACCTCACATTCTTCCCACAACACTTCCTAGGCCTAGCAGGCATGCCACGACGATATTCTGACTACCCAGACGCCTACGCCCTGTGAAATACAGTATCATCTATTGGGTCACTAATCTCTTTAGTAGCAGTAATCATGTTCCTATTTATTCTATGAGAAGCCTTCGCCGCTAAACGGGAAGTACTATCCGTAGAACTAACAATAACAAATGTAGAATGACTTCACGGCTGCCCTCCCCCTTACCACACATACGAAGAACCAGCATTCGTACAAATTCAATCAAATTAA
>gi|1145139751|gb|KY319909.1| Poropuntius bolovenensis voucher SUC8767 cytochrome c oxidase subunit I (COI) gene, complete cds; mitochondrial
GTGGCAATCACGCGCTGATTCTTCTCTACTAACCACAAAGACATTGGTACCCTTTATCTTGTATTTGGTGCCTGAGCCGGAATAGTAGGAACCGCCTTAAGCCTTCTTATTCGGGCTGAACTTAGCCAACCCGGATCACTTCTAGGTGATGACCAAATTTATAACGTCATCGTTACCGCCCACGCCTTTGTAATAATTTTCTTTATAGTAATGCCTATCCTCATTGGAGGATTTGGGAACTGACTCGTACCACTAATAATCGGAGCCCCAGACATAGCATTTCCACGAATAAATAACATAAGCTTTTGACTACTGCCCCCATCATTTCTGCTATTATTAGCCTCCTCTGGTGTTGAAGCTGGAGCTGGAACAGGGTGAACAGTATACCCACCTCTTGCAGGAAATCTGGCCCATGCAGGAGCATCAGTAGACCTGACAATTTTCTCGCTCCACTTAGCAGGTGTGTCATCAATTTTAGGTGCAATTAATTTTATTACCACAACTATTAACATGAAACCTCCAGCCATCTCCCAATATCAAACACCACTATTTGTCTGATCCGTGCTTGTAACCGCTGTATTACTCCTCCTATCATTACCTGTTTTAGCTGCCGGAATTACAATACTACTAACAGACCGAAACCTTAATACCACTTTCTTTGACCCAGCAGGTGGAGGGGACCCAATCCTTTACCAACACCTATTCTGATTCTTTGGGCACCCGAAAGTTTATATTCTTATTCTCCCGGGATTCGGAATTATTTCCCACGTCGTAGCCTACTACTCAGGTAAAAAAGAACCATTTGGTTATATAGGAATAGTTTGAGCCATAATGGCCATCGGCCTTCTAGGATTTATCGTATGGGCCCACCACATATTCACTGTTGGAATAGACGTAGACACTCGTGCATACTTCACATCTGCGACAATAATTATTGCAATTCCAACAGGTGTAAAAGTATTCAGCTGACTAGCCACACTTCACGGAGGGTCTATTAAATGAGAAACACCTATGCTATGGGCCCTAGGATTTATTTTCCTGTTCACAGTAGGTGGTTTAACAGGAATCGTCCTATCCAACTCATCACTAGACATTGTCCTTCATGACACCTATTATGTAGTTGCGCATTTCCACTATGTATTATCAATAGGTGCCGTATTCGCCATTATAGCAGCTTTCGTACACTGATTCCCCCTATTAACCGGATATACCCTACACAGCGCCTGAACAAAAATCCACTTTGCGGTTATGTTTATTGGGGTCAACCTCACATTCTTCCCACAACACTTCCTAGGCCTAGCAGGCATGCCACGACGATATTCTGACTACCCAGACGCCTACGCCCTGTGAAATACAGTATCATCTATTGGGTCACTAATCTCTTTAGTAGCAGTAATCATGTTCCTATTTATTCTATGAGAAGCCTTCGCCGCTAAACGGGAAGTACTATCCGTAGAACTAACAATAACAAATGTAGAATGACTTCACGGCTGCCCTCCCCCTTACCACACATACGAAGAACCAGCATTCGTACAAATTCAATCAAATTAA
>gi|1145139753|gb|KY319910.1| Poropuntius bolovenensis voucher SUC8768 cytochrome c oxidase subunit I (COI) gene, complete cds; mitochondrial
GTGGCAATCACGCGCTGATTCTTCTCTACTAACCACAAAGACATTGGTACCCTTTATCTTGTATTTGGTGCCTGAGCCGGAATAGTAGGAACCGCCTTAAGCCTTCTTATTCGGGCTGAACTTAGCCAACCCGGATCACTTCTAGGTGATGACCAAATTTATAACGTCATCGTTACCGCCCACGCCTTTGTAATAATTTTCTTTATAGTAATGCCTATCCTCATTGGAGGATTTGGGAACTGACTCGTACCACTAATAATCGGAGCCCCAGACATAGCATTTCCACGAATAAATAACATAAGCTTTTGACTACTGCCCCCATCATTTCTGCTATTATTAGCCTCCTCTGGTGTTGAAGCTGGAGCTGGAACAGGGTGAACAGTATACCCACCTCTTGCAGGAAATCTGGCCCATGCAGGAGCATCAGTAGACCTGACAATTTTCTCGCTCCACTTAGCAGGTGTGTCATCAATTTTAGGTGCAATTAATTTTATTACCACAACTATTAACATGAAACCTCCAGCCATCTCCCAATATCAAACACCACTATTTGTCTGATCCGTGCTTGTAACCGCTGTATTACTCCTCCTATCATTACCTGTTTTAGCTGCCGGAATTACAATACTACTAACAGACCGAAACCTTAATACCACTTTCTTTGACCCAGCAGGTGGAGGGGACCCAATCCTTTACCAACACCTATTCTGATTCTTTGGGCACCCGAAAGTTTATATTCTTATTCTCCCGGGATTCGGAATTATTTCCCACGTCGTAGCCTACTACTCAGGTAAAAAAGAACCATTTGGTTATATAGGAATAGTTTGAGCCATAATGGCCATCGGCCTTCTAGGATTTATCGTATGGGCCCACCACATATTCACTGTTGGAATAGACGTAGACACTCGTGCATACTTCACATCTGCGACAATAATTATTGCAATTCCAACAGGTGTAAAAGTATTCAGCTGACTAGCCACACTTCACGGAGGGTCTATTAAATGAGAAACACCTATGCTATGGGCCCTAGGATTTATTTTCCTGTTCACAGTAGGTGGTTTAACAGGAATCGTCCTATCCAACTCATCACTAGACATTGTCCTTCATGACACCTATTATGTAGTTGCGCATTTCCACTATGTATTATCAATAGGTGCCGTATTCGCCATTATAGCAGCTTTCGTACACTGATTCCCCCTATTAACCGGATATACCCTACACAGCGCCTGAACAAAAATCCACTTTGCGGTTATGTTTATTGGGGTCAACCTCACATTCTTCCCACAACACTTCCTAGGCCTAGCAGGCATGCCACGACGATATTCTGACTACCCAGACGCCTACGCCCTGTGAAATACAGTATCATCTATTGGGTCACTAATCTCTTTAGTAGCAGTAATCATGTTCCTATTTATTCTATGAGAAGCCTTCGCCGCTAAACGGGAAGTACTATCCGTAGAACTAACAATAACAAATGTAGAATGACTTCACGGCTGCCCTCCCCCTTACCACACATACGAAGAACCAGCATTCGTACAAATTCAATCAAATTAA
>gi|1145139755|gb|KY319911.1| Poropuntius bolovenensis voucher SUC8769 cytochrome c oxidase subunit I (COI) gene, complete cds; mitochondrial
GTGGCAATCACGCGCTGATTCTTCTCTACTAACCACAAAGACATTGGTACCCTTTATCTTGTATTTGGTGCCTGAGCCGGAATAGTAGGAACCGCCTTAAGCCTTCTTATTCGGGCTGAACTTAGCCAACCCGGATCACTTCTAGGTGATGACCAAATTTATAACGTCATCGTTACCGCCCACGCCTTTGTAATAATTTTCTTTATAGTAATGCCTATCCTCATTGGAGGATTTGGGAACTGACTCGTGCCACTAATAATCGGAGCCCCAGACATAGCATTTCCACGAATAAATAACATAAGCTTTTGACTACTGCCCCCATCATTTCTGCTATTATTAGCCTCCTCTGGTGTTGAAGCTGGAGCTGGAACAGGGTGAACAGTATACCCACCTCTTGCAGGAAATCTGGCCCATGCAGGAGCATCAGTAGACCTGACAATTTTCTCGCTCCACTTAGCAGGTGTGTCATCAATTTTAGGTGCAATTAATTTTATTACCACAACTATTAACATGAAACCTCCAGCCATCTCCCAATATCAAACACCACTATTTGTCTGATCCGTGCTTGTAACCGCTGTATTACTCCTCCTATCATTACCTGTTTTAGCTGCCGGAATTACAATACTACTAACAGACCGAAACCTTAATACCACTTTCTTTGACCCAGCAGGTGGAGGGGACCCAATCCTTTACCAACACCTATTCTGATTCTTTGGGCACCCGAAAGTTTATATTCTTATTCTCCCGGGATTCGGAATTATTTCCCACGTCGTAGCCTACTACTCAGGTAAAAAAGAACCATTTGGTTATATAGGAATAGTTTGAGCCATAATGGCCATCGGCCTTCTAGGATTTATCGTATGGGCCCACCACATATTCACTGTTGGAATAGACGTAGACACTCGTGCATACTTCACATCTGCGACAATAATTATTGCAATTCCAACAGGTGTAAAAGTATTCAGCTGACTAGCCACACTTCACGGAGGGTCTATTAAATGAGAAACACCTATGCTATGGGCCCTAGGATTTATTTTCCTGTTCACAGTAGGTGGTTTAACAGGAATCGTCCTATCCAACTCATCACTAGACATTGTCCTTCATGACACCTATTATGTAGTTGCGCATTTCCACTATGTATTATCAATAGGTGCCGTATTCGCCATTATAGCAGCTTTCGTACACTGATTCCCCCTATTAACCGGATATACCCTACACAGCGCCTGAACAAAAATCCACTTTGCGGTTATGTTTATTGGGGTCAACCTCACATTCTTCCCACAACACTTCCTAGGCCTAGCAGGCATGCCACGACGATATTCTGACTACCCAGACGCCTACGCCCTGTGAAATACAGTATCATCTATTGGGTCACTAATCTCTTTAGTAGCAGTAATCATGTTCCTATTTATTCTATGAGAAGCCTTCGCCGCTAAACGGGAAGTACTATCCGTAGAACTAACAATAACAAATGTAGAATGACTTCACGGCTGCCCTCCCCCTTACCACACATACGAAGAACCAGCATTCGTACAAATTCAATCAAATTAA
>gi|1145139757|gb|KY319912.1| Poropuntius bolovenensis voucher SUC8770 cytochrome c oxidase subunit I (COI) gene, complete cds; mitochondrial
GTGGCAATCACGCGCTGATTCTTCTCTACTAACCACAAAGACATTGGTACCCTTTATCTTGTATTTGGTGCCTGAGCCGGAATAGTAGGAACCGCCTTAAGCCTTCTTATTCGGGCTGAACTTAGCCAACCCGGATCACTTCTAGGTGATGACCAAATTTATAACGTCATCGTTACCGCCCACGCCTTTGTAATAATTTTCTTTATAGTAATGCCTATCCTCATTGGAGGATTTGGGAACTGACTCGTGCCACTAATAATCGGAGCCCCAGACATAGCATTTCCACGAATAAATAACATAAGCTTTTGACTACTACCCCCATCATTTCTGCTATTATTAGCCTCCTCTGGTGTTGAAGCTGGAGCTGGAACAGGGTGAACAGTATACCCACCTCTTGCAGGAAATCTGGCCCATGCAGGAGCATCAGTAGACCTGACAATTTTCTCGCTCCACTTAGCAGGTGTGTCATCAATTTTAGGTGCAATTAATTTTATTACCACAACTATTAACATGAAACCTCCAGCCATCTCCCAATATCAAACACCACTATTTGTCTGATCCGTGCTTGTAACCGCTGTATTACTCCTCCTATCATTACCTGTTTTAGCTGCCGGAATTACAATACTACTAACAGACCGAAACCTTAATACCACTTTCTTTGACCCAGCAGGTGGAGGGGACCCAATCCTTTACCAACACCTATTCTGATTCTTTGGGCACCCGAAAGTTTATATTCTTATTCTCCCGGGATTCGGAATTATTTCCCACGTCGTAGCCTACTACTCAGGTAAAAAAGAACCATTTGGTTATATAGGAATAGTTTGAGCCATAATGGCCATCGGCCTTCTAGGATTTATCGTATGGGCCCACCACATATTCACTGTTGGAATAGACGTAGACACTCGTGCATACTTCACATCTGCGACAATAATTATTGCAATTCCAACAGGTGTAAAAGTATTCAGCTGACTAGCCACACTTCACGGAGGGTCTATTAAATGAGAAACACCTATGCTATGGGCCCTAGGATTTATTTTCCTGTTCACAGTAGGTGGTTTAACAGGAATCGTCCTATCCAACTCATCACTAGACATTGTCCTTCATGACACCTATTATGTAGTTGCGCATTTCCACTATGTATTATCAATAGGTGCCGTATTCGCCATTATAGCAGCTTTCGTACACTGATTCCCCCTATTAACCGGATATACCCTACACAGCGCCTGAACAAAAATCCACTTTGCGGTTATGTTTATTGGGGTCAACCTCACATTCTTCCCACAACACTTCCTAGGCCTAGCAGGCATGCCACGACGATATTCTGACTACCCAGACGCCTACGCCCTGTGAAATACAGTATCATCTATTGGGTCACTAATCTCTTTAGTAGCAGTAATCATGTTCCTATTTATTCTATGAGAAGCCTTCGCCGCTAAACGGGAAGTACTATCCGTAGAACTAACAATAACAAATGTAGAATGACTTCACGGCTGCCCTCCCCCTTACCACACATACGAAGAACCAGCATTCGTACAAATTCAATCAAATTAA
>gi|1145139759|gb|KY319913.1| Poropuntius bolovenensis voucher SUC8771 cytochrome c oxidase subunit I (COI) gene, complete cds; mitochondrial
GTGGCAATCACGCGCTGATTCTTCTCTACTAACCACAAAGACATTGGTACCCTTTATCTTGTATTTGGTGCCTGAGCCGGAATAGTAGGAACCGCCTTAAGCCTTCTTATTCGGGCTGAACTTAGCCAACCCGGATCACTTCTAGGTGATGACCAAATTTATAACGTCATCGTTACCGCCCACGCCTTTGTAATAATTTTCTTTATAGTAATGCCTATCCTCATTGGAGGATTTGGGAACTGACTCGTGCCACTAATAATCGGAGCCCCAGACATAGCATTTCCACGAATAAATAACATAAGCTTTTGACTACTACCCCCATCATTTCTGCTATTATTAGCCTCCTCTGGTGTTGAAGCTGGAGCTGGAACAGGGTGAACAGTATACCCACCTCTTGCAGGAAATCTGGCCCATGCAGGAGCATCAGTAGACCTGACAATTTTCTCGCTCCACTTAGCAGGTGTGTCATCAATTTTAGGTGCAATTAATTTTATTACCACAACTATTAACATGAAACCTCCAGCCATCTCCCAATATCAAACACCACTATTTGTCTGATCCGTGCTTGTAACCGCTGTATTACTCCTCCTATCATTACCTGTTTTAGCTGCCGGAATTACAATACTACTAACAGACCGAAACCTTAATACCACTTTCTTTGACCCAGCAGGTGGAGGGGACCCAATCCTTTACCAACACCTATTCTGATTCTTTGGGCACCCGAAAGTTTATATTCTTATTCTCCCGGGATTCGGAATTATTTCCCACGTCGTAGCCTACTACTCAGGTAAAAAAGAACCATTTGGTTATATAGGAATAGTTTGAGCCATAATGGCCATCGGCCTTCTAGGATTTATCGTATGGGCCCACCACATATTCACTGTTGGAATAGACGTAGACACTCGTGCATACTTCACATCTGCGACAATAATTATTGCAATTCCAACAGGTGTAAAAGTATTCAGCTGACTAGCCACACTTCACGGAGGGTCTATTAAATGAGAAACACCTATGCTATGGGCCCTAGGATTTATTTTCCTGTTCACAGTAGGTGGTTTAACAGGAATCGTCCTATCCAACTCATCACTAGACATTGTCCTTCATGACACCTATTATGTAGTTGCGCATTTCCACTATGTATTATCAATAGGTGCCGTATTCGCCATTATAGCAGCTTTCGTACACTGATTCCCCCTATTAACCGGATATACCCTACACAGCGCCTGAACAAAAATCCACTTTGCGGTTATGTTTATTGGGGTCAACCTCACATTCTTCCCACAACACTTCCTAGGCCTAGCAGGCATGCCACGACGATATTCTGACTACCCAGACGCCTACGCCCTGTGAAATACAGTATCATCTATTGGGTCACTAATCTCTTTAGTAGCAGTAATCATGTTCCTATTTATTCTATGAGAAGCCTTCGCCGCTAAACGGGAAGTACTATCCGTAGAACTAACAATAACAAATGTAGAATGACTTCACGGCTGCCCTCCCCCTTACCACACATACGAAGAACCAGCATTCGTACAAATTCAATCAAATTAA
>gi|1145139761|gb|KY319914.1| Poropuntius bolovenensis voucher SUC8772 cytochrome c oxidase subunit I (COI) gene, complete cds; mitochondrial
GTGGCAATCACGCGCTGATTCTTCTCTACTAACCACAAAGACATTGGTACCCTTTATCTTGTATTTGGTGCCTGAGCCGGAATAGTAGGAACCGCCTTAAGCCTTCTTATTCGGGCTGAACTTAGCCAACCCGGATCACTTCTAGGTGATGACCAAATTTATAACGTCATCGTTACCGCCCACGCCTTTGTAATAATTTTCTTTATAGTAATGCCTATCCTCATTGGAGGATTTGGGAACTGACTCGTGCCACTAATAATCGGAGCCCCAGACATAGCATTTCCACGAATAAATAACATAAGCTTTTGACTACTACCCCCATCATTTCTGCTATTATTAGCCTCCTCTGGTGTTGAAGCTGGAGCTGGAACAGGGTGAACAGTATACCCACCTCTTGCAGGAAATCTGGCCCATGCAGGAGCATCAGTAGACCTGACAATTTTCTCGCTCCACTTAGCAGGTGTGTCATCAATTTTAGGTGCAATTAATTTTATTACCACAACTATTAACATGAAACCTCCAGCCATCTCCCAATATCAAACACCACTATTTGTCTGATCCGTGCTTGTAACCGCTGTATTACTCCTCCTATCATTACCTGTTTTAGCTGCCGGAATTACAATACTACTAACAGACCGAAACCTTAATACCACTTTCTTTGACCCAGCAGGTGGAGGGGACCCAATCCTTTACCAACACCTATTCTGATTCTTTGGGCACCCGAAAGTTTATATTCTTATTCTCCCGGGATTCGGAATTATTTCCCACGTCGTAGCCTACTACTCAGGTAAAAAAGAACCATTTGGTTATATAGGAATAGTTTGAGCCATAATGGCCATCGGCCTTCTAGGATTTATCGTATGGGCCCACCACATATTCACTGTTGGAATAGACGTAGACACTCGTGCATACTTCACATCTGCGACAATAATTATTGCAATTCCAACAGGTGTAAAAGTATTCAGCTGACTAGCCACACTTCACGGAGGGTCTATTAAATGAGAAACACCTATGCTATGGGCCCTAGGATTTATTTTCCTGTTCACAGTAGGTGGTTTAACAGGAATCGTCCTATCCAACTCATCACTAGACATTGTCCTTCATGACACCTATTATGTAGTTGCGCATTTCCACTATGTATTATCAATAGGTGCCGTATTCGCCATTATAGCAGCTTTCGTACACTGATTCCCCCTATTAACCGGATATACCCTACACAGCGCCTGAACAAAAATCCACTTTGCGGTTATGTTTATTGGGGTCAACCTCACATTCTTCCCACAACACTTCCTAGGCCTAGCAGGCATGCCACGACGATATTCTGACTACCCAGACGCCTACGCCCTGTGAAATACAGTATCATCTATTGGGTCACTAATCTCTTTAGTAGCAGTAATCATGTTCCTATTTATTCTATGAGAAGCCTTCGCCGCTAAACGGGAAGTACTATCCGTAGAACTAACAATAACAAATGTAGAATGACTTCACGGCTGCCCTCCCCCTTACCACACATACGAAGAACCAGCATTCGTACAAATTCAATCAAATTAA
>gi|1145139763|gb|KY319915.1| Poropuntius bolovenensis voucher SUC8773 cytochrome c oxidase subunit I (COI) gene, complete cds; mitochondrial
GTGGCAATCACGCGCTGATTCTTCTCTACTAACCACAAAGACATTGGTACCCTTTATCTTGTATTTGGTGCCTGAGCCGGAATAGTAGGAACCGCCTTAAGCCTTCTTATTCGGGCTGAACTTAGCCAACCCGGATCACTTCTAGGTGATGACCAAATTTATAACGTCATCGTTACCGCCCACGCCTTTGTAATAATTTTCTTTATAGTAATGCCTATCCTCATTGGAGGATTTGGGAACTGACTCGTGCCACTAATAATCGGAGCCCCAGACATAGCATTTCCACGAATAAATAACATAAGCTTTTGACTACTGCCCCCATCATTTCTGCTATTATTAGCCTCCTCTGGTGTTGAAGCTGGAGCTGGAACAGGGTGAACAGTATACCCACCTCTTGCAGGAAATCTGGCCCATGCAGGAGCATCAGTAGACCTGACAATTTTCTCGCTCCACTTAGCAGGTGTGTCATCAATTTTAGGTGCAATTAATTTTATTACCACAACTATTAACATGAAACCTCCAGCCATCTCCCAATATCAAACACCACTATTTGTCTGATCCGTGCTTGTAACCGCTGTATTACTCCTCCTATCATTACCTGTTTTAGCTGCCGGAATTACAATACTACTAACAGACCGAAACCTTAATACCACTTTCTTTGACCCAGCAGGTGGAGGAGACCCAATCCTTTACCAACACCTATTCTGATTCTTTGGGCACCCGAAAGTTTATATTCTTATTCTCCCGGGATTCGGAATTATTTCCCACGTCGTAGCCTACTACTCAGGTAAAAAAGAACCATTTGGTTATATAGGAATAGTTTGAGCCATAATGGCCATCGGCCTTCTAGGATTTATCGTATGGGCCCACCACATATTCACTGTTGGAATAGACGTAGACACTCGTGCATACTTCACATCTGCGACAATAATTATTGCAATTCCAACAGGTGTAAAAGTATTCAGCTGACTAGCCACACTTCACGGAGGGTCTATTAAATGAGAAACACCTATGCTATGGGCCCTAGGATTTATTTTCCTGTTCACAGTAGGTGGTTTAACAGGAATCGTCCTATCCAACTCATCACTAGACATTGTCCTTCATGACACCTATTATGTAGTTGCGCATTTCCACTATGTATTATCAATAGGTGCCGTATTCGCCATTATAGCAGCTTTCGTACACTGATTCCCCCTATTAACCGGATATACCCTACACAGCGCCTGAACAAAAATCCACTTTGCGGTTATGTTTATTGGGGTCAACCTCACATTCTTCCCACAACACTTCCTAGGCCTAGCAGGCATGCCACGACGATATTCTGACTACCCAGACGCCTACGCCCTGTGAAATACAGTATCATCTATTGGGTCACTAATCTCTTTAGTAGCAGTAATCATGTTCCTATTTATTCTATGAGAAGCCTTCGCCGCTAAACGGGAAGTACTATCCGTAGAACTAACAATAACAAATGTAGAATGACTTCACGGCTGCCCTCCCCCTTACCACACATACGAAGAACCAGCATTCGTACAAATTCAATCAAATTAA
>gi|1145139765|gb|KY319916.1| Poropuntius bolovenensis voucher SUC8774 cytochrome c oxidase subunit I (COI) gene, complete cds; mitochondrial
GTGGCAATCACGCGCTGATTCTTCTCTACTAACCACAAAGACATTGGTACCCTTTATCTTGTATTTGGTGCCTGAGCCGGAATAGTAGGAACCGCCTTAAGCCTTCTTATTCGGGCTGAACTTAGCCAACCCGGATCACTTCTAGGTGATGACCAAATTTATAACGTCATCGTTACCGCCCACGCCTTTGTAATAATTTTCTTTATAGTAATGCCTATCCTCATTGGAGGATTTGGGAACTGACTCGTGCCACTAATAATCGGAGCCCCAGACATAGCATTTCCACGAATAAATAACATAAGCTTTTGACTACTGCCCCCATCATTTCTGCTATTATTAGCCTCCTCTGGTGTTGAAGCTGGAGCTGGAACAGGGTGAACAGTATACCCACCTCTTGCAGGAAATCTGGCCCATGCAGGAGCATCAGTAGACCTGACAATTTTCTCGCTCCACTTAGCAGGTGTGTCATCAATTTTAGGTGCAATTAATTTTATTACCACAACTATTAACATGAAACCTCCAGCCATCTCCCAATATCAAACACCACTATTTGTCTGATCCGTGCTTGTAACCGCTGTATTACTCCTCCTATCATTACCTGTTTTAGCTGCCGGAATTACAATACTACTAACAGACCGAAACCTTAATACCACTTTCTTTGACCCAGCAGGTGGAGGGGACCCAATCCTTTACCAACACCTATTCTGATTCTTTGGGCACCCGAAAGTTTATATTCTTATTCTCCCGGGATTCGGAATTATTTCCCACGTCGTAGCCTACTACTCAGGTAAAAAAGAACCATTTGGTTATATAGGAATAGTTTGAGCCATAATGGCCATCGGCCTTCTAGGATTTATCGTATGGGCCCACCACATATTCACTGTTGGAATAGACGTAGACACTCGTGCATACTTCACATCTGCGACAATAATTATTGCAATTCCAACAGGTGTAAAAGTATTCAGCTGACTAGCCACACTTCACGGAGGGTCTATTAAATGAGAAACACCTATGCTATGGGCCCTAGGATTTATTTTCCTGTTCACAGTAGGTGGTTTAACAGGAATCGTCCTATCCAACTCATCACTAGACATTGTCCTTCATGACACCTATTATGTAGTTGCGCATTTCCACTATGTATTATCAATAGGTGCCGTATTCGCCATTATAGCAGCTTTCGTACACTGATTCCCCCTATTAACCGGATATACCCTACACAGCGCCTGAACAAAAATCCACTTTGCGGTTATGTTTATTGGGGTCAACCTCACATTCTTCCCACAACACTTCCTAGGCCTAGCAGGCATGCCACGACGATATTCTGACTACCCAGACGCCTACGCCCTGTGAAATACAGTATCATCTATTGGGTCACTAATCTCTTTAGTAGCAGTAATCATGTTCCTATTTATTCTATGAGAAGCCTTCGCCGCTAAACGGGAAGTACTATCCGTAGAACTAACAATAACAAATGTAGAATGACTTCACGGCTGCCCTCCCCCTTACCACACATACGAAGAACCAGCATTCGTACAAATTCAATCAAATTAA
>gi|1145139767|gb|KY319917.1| Poropuntius bolovenensis voucher SUC8775 cytochrome c oxidase subunit I (COI) gene, complete cds; mitochondrial
GTGGCAATCACGCGCTGATTCTTCTCTACTAACCACAAAGACATTGGTACCCTTTATCTTGTATTTGGTGCCTGAGCCGGAATAGTAGGAACCGCCTTAAGCCTTCTTATTCGGGCTGAACTTAGCCAACCCGGATCACTTCTAGGTGATGACCAAATTTATAACGTCATCGTTACCGCCCACGCCTTTGTAATAATTTTCTTTATAGTAATGCCTATCCTCATTGGAGGATTTGGGAACTGACTCGTGCCACTAATAATCGGAGCCCCAGACATAGCATTTCCACGAATAAATAACATAAGCTTTTGACTACTGCCCCCATCATTTCTGCTATTATTAGCCTCCTCTGGTGTTGAAGCTGGAGCTGGAACAGGGTGAACAGTATACCCACCTCTTGCAGGAAATCTGGCCCATGCAGGAGCATCAGTAGACCTGACAATTTTCTCGCTCCACTTAGCAGGTGTGTCATCAATTTTAGGTGCAATTAATTTTATTACCACAACTATTAACATGAAACCTCCAGCCATCTCCCAATATCAAACACCACTATTTGTCTGATCCGTGCTTGTAACCGCTGTATTACTCCTCCTATCATTACCTGTTTTAGCTGCCGGAATTACAATACTACTAACAGACCGAAACCTTAATACCACTTTCTTTGACCCAGCAGGTGGAGGGGACCCAATCCTTTACCAACACCTATTCTGATTCTTTGGGCACCCGAAAGTTTATATTCTTATTCTCCCGGGATTCGGAATTATTTCCCACGTCGTAGCCTACTACTCAGGTAAAAAAGAACCATTTGGTTATATAGGAATAGTTTGAGCCATAATGGCCATCGGCCTTCTAGGATTTATCGTATGGGCCCACCACATATTCACTGTTGGAATAGACGTAGACACTCGTGCATACTTCACATCTGCGACAATAATTATTGCAATTCCAACAGGTGTAAAAGTATTCAGCTGACTAGCCACACTTCACGGAGGGTCTATTAAATGAGAAACACCTATGCTATGGGCCCTAGGATTTATTTTCCTGTTCACAGTAGGTGGTTTAACAGGAATCGTCCTATCCAACTCATCACTAGACATTGTCCTTCATGACACCTATTATGTAGTTGCGCATTTCCACTATGTATTATCAATAGGTGCCGTATTCGCCATTATAGCAGCTTTCGTACACTGATTCCCCCTATTAACCGGATATACCCTACACAGCGCCTGAACAAAAATCCACTTTGCGGTTATGTTTATTGGGGTCAACCTCACATTCTTCCCACAACACTTCCTAGGCCTAGCAGGCATGCCACGACGATATTCTGACTACCCAGACGCCTACGCCCTGTGAAATACAGTATCATCTATTGGGTCACTAATCTCTTTAGTAGCAGTAATCATGTTCCTATTTATTCTATGAGAAGCCTTCGCCGCTAAACGGGAAGTACTATCCGTAGAACTAACAATAACAAATGTAGAATGACTTCACGGCTGCCCTCCCCCTTACCACACATACGAAGAACCAGCATTCGTACAAATTCAATCAAATTAA
>gi|1145139769|gb|KY319918.1| Poropuntius bolovenensis voucher SUC8776 cytochrome c oxidase subunit I (COI) gene, complete cds; mitochondrial
GTGGCAATCACGCGCTGATTCTTCTCTACTAACCACAAAGACATTGGTACCCTTTATCTTGTATTTGGTGCCTGAGCCGGAATAGTAGGAACCGCCTTAAGCCTTCTTATTCGGGCTGAACTTAGCCAACCCGGATCACTTCTAGGTGATGACCAAATTTATAACGTCATCGTTACCGCCCACGCCTTTGTAATAATTTTCTTTATAGTAATGCCTATCCTCATTGGAGGATTTGGGAACTGACTCGTGCCACTAATAATCGGAGCCCCAGACATAGCATTTCCACGAATAAATAACATAAGCTTTTGACTACTACCCCCATCATTTCTGCTATTATTAGCCTCCTCTGGTGTTGAAGCTGGAGCTGGAACAGGGTGAACAGTATACCCACCTCTTGCAGGAAATCTGGCCCATGCAGGAGCATCAGTAGACCTGACAATTTTCTCGCTCCACTTAGCAGGTGTGTCATCAATTTTAGGTGCAATTAATTTTATTACCACAACTATTAACATGAAACCTCCAGCCATCTCCCAATATCAAACACCACTATTTGTCTGATCCGTGCTTGTAACCGCTGTATTACTCCTCCTATCATTACCTGTTTTAGCTGCCGGAATTACAATACTACTAACAGACCGAAACCTTAATACCACTTTCTTTGACCCAGCAGGTGGAGGGGACCCAATCCTTTACCAACACCTATTCTGATTCTTTGGGCACCCGAAAGTTTATATTCTTATTCTCCCGGGATTCGGAATTATTTCCCACGTCGTAGCCTACTACTCAGGTAAAAAAGAACCATTTGGTTATATAGGAATAGTTTGAGCCATAATGGCCATCGGCCTTCTAGGATTTATCGTATGGGCCCACCACATATTCACTGTTGGAATAGACGTAGACACTCGTGCATACTTCACATCTGCGACAATAATTATTGCAATTCCAACAGGTGTAAAAGTATTCAGCTGACTAGCCACACTTCACGGAGGGTCTATTAAATGAGAAACACCTATGCTATGGGCCCTAGGATTTATTTTCCTGTTCACAGTAGGTGGTTTAACAGGAATCGTCCTATCCAACTCATCACTAGACATTGTCCTTCATGACACCTATTATGTAGTTGCGCATTTCCACTATGTATTATCAATAGGTGCCGTATTCGCCATTATAGCAGCTTTCGTACACTGATTCCCCCTATTAACCGGATATACCCTACACAGCGCCTGAACAAAAATCCACTTTGCGGTTATGTTTATTGGGGTCAACCTCACATTCTTCCCACAACACTTCCTAGGCCTAGCAGGCATGCCACGACGATATTCTGACTACCCAGACGCCTACGCCCTGTGAAATACAGTATCATCTATTGGGTCACTAATCTCTTTAGTAGCAGTAATCATGTTCCTATTTATTCTATGAGAAGCCTTCGCCGCTAAACGGGAAGTACTATCCGTAGAACTAACAATAACAAATGTAGAATGACTTCACGGCTGCCCTCCCCCTTACCACACATACGAAGAACCAGCATTCGTACAAATTCAATCAAATTAA
>gi|1145139771|gb|KY319919.1| Poropuntius bolovenensis voucher SUC8777 cytochrome c oxidase subunit I (COI) gene, complete cds; mitochondrial
GTGGCAATCACGCGCTGATTCTTCTCTACTAACCACAAAGACATTGGTACCCTTTATCTTGTATTTGGTGCCTGAGCCGGAATAGTAGGAACCGCCTTAAGCCTTCTTATTCGGGCTGAACTTAGCCAACCCGGATCACTTCTAGGTGATGACCAAATTTATAACGTCATCGTTACCGCCCACGCCTTTGTAATAATTTTCTTTATAGTAATGCCTATCCTCATTGGAGGATTTGGGAACTGACTCGTGCCACTAATAATCGGAGCCCCAGACATAGCATTTCCACGAATAAATAACATAAGCTTTTGACTACTGCCCCCATCATTTCTGCTATTATTAGCCTCCTCTGGTGTTGAAGCTGGAGCTGGAACAGGGTGAACAGTATACCCACCTCTTGCAGGAAATCTGGCCCATGCAGGAGCATCAGTAGACCTGACAATTTTCTCGCTCCACTTAGCAGGTGTGTCATCAATTTTAGGTGCAATTAATTTTATTACCACAACTATTAACATGAAACCTCCAGCCATCTCCCAATATCAAACACCACTATTTGTCTGATCCGTGCTTGTAACCGCTGTATTACTCCTCCTATCATTACCTGTTTTAGCTGCCGGAATTACAATACTACTAACAGACCGAAACCTTAATACCACTTTCTTTGACCCAGCAGGTGGAGGGGACCCAATCCTTTACCAACACCTATTCTGATTCTTTGGGCACCCGAAAGTTTATATTCTTATTCTCCCGGGATTCGGAATTATTTCCCACGTCGTAGCCTACTACTCAGGTAAAAAAGAACCATTTGGTTATATAGGAATAGTTTGAGCCATAATGGCCATCGGCCTTCTAGGATTTATCGTATGGGCCCACCACATATTCACTGTTGGAATAGACGTAGACACTCGTGCATACTTCACATCTGCGACAATAATTATTGCAATTCCAACAGGTGTAAAAGTATTCAGCTGACTAGCCACACTTCACGGAGGGTCTATTAAATGAGAAACACCTATGCTATGGGCCCTAGGATTTATTTTCCTGTTCACAGTAGGTGGTTTAACAGGAATCGTCCTATCCAACTCATCACTAGACATTGTCCTTCATGACACCTATTATGTAGTTGCGCATTTCCACTATGTACTATCAATAGGTGCCGTATTCGCCATTATAGCAGCTTTCGTACACTGATTCCCCCTATTAACCGGATACACCCTACACAGCGCCTGAACAAAAATCCACTTTGCGGTTATGTTTATTGGGGTCAACCTCACATTCTTCCCACAACACTTCCTAGGCCTAGCAGGCATGCCACGACGATATTCTGACTATCCAGACGCCTACGCCCTGTGAAATACAGTATCATCTATTGGGTCACTAATCTCTTTAGTAGCAGTAATCATGTTCCTATTTATTCTATGAGAAGCCTTCGCCGCTAAACGGGAAGTACTATCCGTAGAACTAACAATAACAAATGTAGAATGACTTCACGGCTGCCCTCCCCCTTACCACACATACGAAGAACCAGCATTCGTACAAATTCAATCAAATTAA
>gi|1145139773|gb|KY319920.1| Poropuntius bolovenensis voucher SUC8778 cytochrome c oxidase subunit I (COI) gene, complete cds; mitochondrial
GTGGCAATCACGCGCTGATTCTTCTCTACTAACCACAAAGACATTGGTACCCTTTATCTTGTATTTGGTGCCTGAGCCGGAATAGTAGGAACCGCCTTAAGCCTTCTTATTCGGGCTGAACTTAGCCAACCCGGATCACTTCTAGGTGATGACCAAATTTATAACGTCATCGTTACCGCCCACGCCTTTGTAATAATTTTCTTTATAGTAATGCCTATCCTCATTGGAGGATTTGGGAACTGACTCGTGCCACTAATAATCGGAGCCCCAGACATAGCATTTCCACGAATAAATAACATAAGCTTTTGACTACTGCCCCCATCATTTCTGCTATTATTAGCCTCCTCTGGTGTTGAAGCTGGAGCTGGAACAGGGTGAACAGTATACCCACCTCTTGCAGGAAATCTGGCCCATGCAGGAGCATCAGTAGACCTGACAATTTTCTCGCTCCACTTAGCAGGTGTGTCATCAATTTTAGGTGCAATTAATTTTATTACCACAACTATTAACATGAAACCTCCAGCCATCTCCCAATATCAAACACCACTATTTGTCTGATCCGTGCTTGTAACCGCTGTATTACTCCTCCTATCATTACCTGTTTTAGCTGCCGGAATTACAATACTACTAACAGACCGAAACCTTAATACCACTTTCTTTGACCCAGCAGGTGGAGGGGACCCAATCCTTTACCAACACCTATTCTGATTCTTTGGGCACCCGAAAGTTTATATTCTTATTCTCCCGGGATTCGGAATTATTTCCCACGTCGTAGCCTACTACTCAGGTAAAAAAGAACCATTTGGTTATATAGGAATAGTTTGAGCCATAATGGCCATCGGCCTTCTAGGATTTATCGTATGGGCCCACCACATATTCACTGTTGGAATAGACGTAGACACTCGTGCATACTTCACATCTGCGACAATAATTATTGCAATTCCAACAGGTGTAAAAGTATTCAGCTGACTAGCCACACTTCACGGAGGGTCTATTAAATGAGAAACACCTATGCTATGGGCCCTAGGATTTATTTTCCTGTTCACAGTAGGTGGTTTAACAGGAATCGTCCTATCCAACTCATCACTAGACATTGTCCTTCATGACACCTATTATGTAGTTGCGCATTTCCACTATGTACTATCAATAGGTGCCGTATTCGCCATTATAGCAGCTTTCGTACACTGATTCCCCCTATTAACCGGATATACCCTACACAGCGCCTGAACAAAAATCCACTTTGCGGTTATGTTTATTGGGGTCAACCTCACATTCTTCCCACAACACTTCCTAGGCCTAGCAGGCATGCCACGACGATATTCTGACTATCCAGACGCCTACGCCCTGTGAAATACAGTATCATCTATTGGGTCACTAATCTCTTTAGTAGCAGTAATCATGTTCCTATTTATTCTATGAGAAGCCTTCGCCGCTAAACGGGAAGTACTATCCGTAGAACTAACAATAACAAATGTAGAATGACTTCACGGCTGCCCTCCCCCTTACCACACATACGAAGAACCAGCATTCGTACAAATTCAATCAAATTAA
>gi|1145139775|gb|KY319921.1| Poropuntius bolovenensis voucher SUC8779 cytochrome c oxidase subunit I (COI) gene, complete cds; mitochondrial
GTGGCAATCACGCGCTGATTCTTCTCTACTAACCACAAAGACATTGGTACCCTTTATCTTGTATTTGGTGCCTGAGCCGGAATAGTAGGAACCGCCTTAAGCCTTCTTATTCGGGCTGAACTTAGCCAACCCGGATCACTTCTAGGTGATGACCAAATTTATAACGTCATCGTTACCGCCCACGCCTTTGTAATAATTTTCTTTATAGTAATGCCTATCCTCATTGGAGGATTTGGGAACTGACTCGTGCCACTAATAATCGGAGCCCCAGACATAGCATTTCCACGAATAAATAACATAAGCTTTTGACTACTGCCCCCATCATTTCTGCTATTATTAGCCTCCTCTGGTGTTGAAGCTGGAGCTGGAACAGGGTGAACAGTATACCCACCTCTTGCAGGAAATCTGGCCCATGCAGGAGCATCAGTAGACCTGACAATTTTCTCGCTCCACTTAGCAGGTGTGTCATCAATTTTAGGTGCAATTAATTTTATTACCACAACTATTAACATGAAACCTCCAGCCATCTCCCAATATCAAACACCACTATTTGTCTGATCCGTGCTTGTAACCGCTGTATTACTCCTCCTATCATTACCTGTTTTAGCTGCCGGAATTACAATACTACTAACAGACCGAAACCTTAATACCACTTTCTTTGACCCAGCAGGTGGAGGGGACCCAATCCTTTACCAACACCTATTCTGATTCTTTGGGCACCCGAAAGTTTATATTCTTATTCTCCCGGGATTCGGAATTATTTCCCACGTCGTAGCCTACTACTCAGGTAAAAAAGAACCATTTGGTTATATAGGAATAGTTTGAGCCATAATGGCCATCGGCCTTCTAGGATTTATCGTATGGGCCCACCACATATTCACTGTTGGAATAGACGTAGACACTCGTGCATACTTCACATCTGCGACAATAATTATTGCAATTCCAACAGGTGTAAAAGTATTCAGCTGACTAGCCACACTTCACGGAGGGTCTATTAAATGAGAAACACCTATGCTATGGGCCCTAGGATTTATTTTCCTGTTCACAGTAGGTGGTTTAACAGGAATCGTCCTATCCAACTCATCACTAGACATTGTCCTTCATGACACCTATTATGTAGTTGCGCATTTCCACTATGTACTATCAATAGGTGCCGTATTCGCCATTATAGCAGCTTTCGTACACTGATTCCCCCTATTAACCGGATACACCCTACACAGCGCCTGAACAAAAATCCACTTTGCGGTTATGTTTATTGGGGTCAACCTCACATTCTTCCCACAACACTTCCTAGGCCTAGCAGGCATGCCACGACGATATTCTGACTATCCAGACGCCTACGCCCTGTGAAATACAGTATCATCTATTGGGTCACTAATCTCTTTAGTAGCAGTAATCATGTTCCTATTTATTCTATGAGAAGCCTTCGCCGCTAAACGGGAAGTACTATCCGTAGAACTAACAATAACAAATGTAGAATGACTTCACGGCTGCCCTCCCCCTTACCACACATACGAAGAACCAGCATTCGTACAAATTCAATCAAATTAA
>gi|1145139777|gb|KY319922.1| Poropuntius bolovenensis voucher SUC8780 cytochrome c oxidase subunit I (COI) gene, complete cds; mitochondrial
GTGGCAATCACGCGCTGATTCTTCTCTACTAACCACAAAGACATTGGTACCCTTTATCTTGTATTTGGTGCCTGAGCCGGAATAGTAGGAACCGCCTTAAGCCTTCTTATTCGGGCTGAACTTAGCCAACCCGGATCACTTCTAGGTGATGACCAAATTTATAACGTCATCGTTACCGCCCACGCCTTTGTAATAATTTTCTTTATAGTAATGCCTATCCTCATTGGAGGATTTGGGAACTGACTCGTGCCACTAATAATCGGAGCCCCAGACATAGCATTTCCACGAATAAATAACATAAGCTTTTGACTACTGCCCCCATCATTTCTGCTATTATTAGCCTCCTCTGGTGTTGAAGCTGGAGCTGGAACAGGGTGAACAGTATACCCACCTCTTGCAGGAAATCTGGCCCATGCAGGAGCATCAGTAGACCTGACAATTTTCTCGCTCCACTTAGCAGGTGTGTCATCAATTTTAGGTGCAATTAATTTTATTACCACAACTATTAACATGAAACCTCCAGCCATCTCCCAATATCAAACACCACTATTTGTCTGATCCGTGCTTGTAACCGCTGTATTACTCCTCCTATCATTACCTGTTTTAGCTGCCGGAATTACAATACTACTAACAGACCGAAACCTTAATACCACTTTCTTTGACCCAGCAGGTGGAGGGGACCCAATCCTTTACCAACACCTATTCTGATTCTTTGGGCACCCGAAAGTTTATATTCTTATTCTCCCGGGATTCGGAATTATTTCCCACGTCGTAGCCTACTACTCAGGTAAAAAAGAACCATTTGGTTATATAGGAATAGTTTGAGCCATAATGGCCATCGGCCTTCTAGGATTTATCGTATGGGCCCACCACATATTCACTGTTGGAATAGACGTAGACACTCGTGCATACTTCACATCTGCGACAATAATTATTGCAATTCCAACAGGTGTAAAAGTATTCAGCTGACTAGCCACACTTCACGGAGGGTCTATTAAATGAGAAACACCTATGCTATGGGCCCTAGGATTTATTTTCCTGTTCACAGTAGGTGGTTTAACAGGAATCGTCCTATCCAACTCATCACTAGACATTGTCCTTCATGACACCTATTATGTAGTTGCGCATTTCCACTATGTACTATCAATAGGTGCCGTATTCGCCATTATAGCAGCTTTCGTACACTGATTCCCCCTATTAACCGGATACACCCTACACAGCGCCTGAACAAAAATCCACTTTGCGGTTATGTTTATTGGGGTCAACCTCACATTCTTCCCACAACACTTCCTAGGCCTAGCAGGCATGCCACGACGATATTCTGACTATCCAGACGCCTACGCCCTGTGAAATACAGTATCATCTATTGGGTCACTAATCTCTTTAGTAGCAGTAATCATGTTCCTATTTATTCTATGAGAAGCCTTCGCCGCTAAACGGGAAGTACTATCCGTAGAACTAACAATAACAAATGTAGAATGACTTCACGGCTGCCCTCCCCCTTACCACACATACGAAGAACCAGCATTCGTACAAATTCAATCAAATTAA
>gi|1145139779|gb|KY319923.1| Poropuntius bolovenensis voucher SUC8781 cytochrome c oxidase subunit I (COI) gene, complete cds; mitochondrial
GTGGCAATCACGCGCTGATTCTTCTCTACTAACCACAAAGACATTGGTACCCTTTATCTTGTATTTGGTGCCTGAGCCGGAATAGTAGGAACCGCCTTAAGCCTTCTTATTCGGGCTGAACTTAGCCAACCCGGATCACTTCTAGGTGATGACCAAATTTATAACGTCATCGTTACCGCCCACGCCTTTGTAATAATTTTCTTTATAGTAATGCCTATCCTCATTGGAGGATTTGGGAACTGACTCGTGCCACTAATAATCGGAGCCCCAGACATAGCATTTCCACGAATAAATAACATAAGCTTTTGACTACTGCCCCCATCATTTCTGCTATTATTAGCCTCCTCTGGTGTTGAAGCTGGAGCTGGAACAGGGTGAACAGTATACCCACCTCTTGCAGGAAATCTGGCCCATGCAGGAGCATCAGTAGACCTGACAATTTTCTCGCTCCACTTAGCAGGTGTGTCATCAATTTTAGGTGCAATTAATTTTATTACCACAACTATTAACATGAAACCTCCAGCCATCTCCCAATATCAAACACCACTATTTGTCTGATCCGTGCTTGTAACCGCTGTATTACTCCTCCTATCATTACCTGTTTTAGCTGCCGGAATTACAATACTACTAACAGACCGAAACCTTAATACCACTTTCTTTGACCCAGCAGGTGGAGGGGACCCAATCCTTTACCAACACCTATTCTGATTCTTTGGGCACCCGAAAGTTTATATTCTTATTCTCCCGGGATTCGGAATTATTTCCCACGTCGTAGCCTACTACTCAGGTAAAAAAGAACCATTTGGTTATATAGGAATAGTTTGAGCCATAATGGCCATCGGCCTTCTAGGATTTATCGTATGGGCCCACCACATATTCACTGTTGGAATAGACGTAGACACTCGTGCATACTTCACATCTGCGACAATAATTATTGCAATTCCAACAGGTGTAAAAGTATTCAGCTGACTAGCCACACTTCACGGAGGGTCTATTAAATGAGAAACACCTATGCTATGGGCCCTAGGATTTATTTTCCTGTTCACAGTAGGTGGTTTAACAGGAATCGTCCTATCCAACTCATCACTAGACATTGTCCTTCATGACACCTATTATGTAGTTGCGCATTTCCACTATGTACTATCAATAGGTGCCGTATTCGCCATTATAGCAGCTTTCGTACACTGATTCCCCCTATTAACCGGATATACCCTACACAGCGCCTGAACAAAAATCCACTTTGCGGTTATGTTTATTGGGGTCAACCTCACATTCTTCCCACAACACTTCCTAGGCCTAGCAGGCATGCCACGACGATATTCTGACTATCCAGACGCCTACGCCCTGTGAAATACAGTATCATCTATTGGGTCACTAATCTCTTTAGTAGCAGTAATCATGTTCCTATTTATTCTATGAGAAGCCTTCGCCGCTAAACGGGAAGTACTATCCGTAGAACTAACAATAACAAATGTAGAATGACTTCACGGCTGCCCTCCCCCTTACCACACATACGAAGAACCAGCATTCGTACAAATTCAATCAAATTAA
>gi|1145139781|gb|KY319924.1| Poropuntius bolovenensis voucher SUC8782 cytochrome c oxidase subunit I (COI) gene, complete cds; mitochondrial
GTGGCAATCACGCGCTGATTCTTCTCTACTAACCACAAAGACATTGGTACCCTTTATCTTGTATTTGGTGCCTGAGCCGGAATAGTAGGAACCGCCTTAAGCCTTCTTATTCGGGCTGAACTTAGCCAACCCGGATCACTTCTAGGTGATGACCAAATTTATAACGTCATCGTTACCGCCCACGCCTTTGTAATAATTTTCTTTATAGTAATGCCTATCCTCATTGGAGGATTTGGGAACTGACTCGTGCCACTAATAATCGGAGCCCCAGACATAGCATTTCCACGAATAAATAACATAAGCTTTTGACTACTGCCCCCATCATTTCTGCTATTATTAGCCTCCTCTGGTGTTGAAGCTGGAGCTGGAACAGGGTGAACAGTATACCCACCTCTTGCAGGAAATCTGGCCCATGCAGGAGCATCAGTAGACCTGACAATTTTCTCGCTCCACTTAGCAGGTGTGTCATCAATTTTAGGTGCAATTAATTTTATTACCACAACTATTAACATGAAACCTCCAGCCATCTCCCAATATCAAACACCACTATTTGTCTGATCCGTGCTTGTAACCGCTGTATTACTCCTCCTATCATTACCTGTTTTAGCTGCCGGAATTACAATACTACTAACAGACCGAAACCTTAATACCACTTTCTTTGACCCAGCAGGTGGAGGGGACCCAATCCTTTACCAACACCTATTCTGATTCTTTGGGCACCCGAAAGTTTATATTCTTATTCTCCCGGGATTCGGAATTATTTCCCACGTCGTAGCCTACTACTCAGGTAAAAAAGAACCATTTGGTTATATAGGAATAGTTTGAGCCATAATGGCCATCGGCCTTCTAGGATTTATCGTATGGGCCCACCACATATTCACTGTTGGAATAGACGTAGACACTCGTGCATACTTCACATCTGCGACAATAATTATTGCAATTCCAACAGGTGTAAAAGTATTCAGCTGACTAGCCACACTTCACGGAGGGTCTATTAAATGAGAAACACCTATGCTATGGGCCCTAGGATTTATTTTCCTGTTCACAGTAGGTGGTTTAACAGGAATCGTCCTATCCAACTCATCACTAGACATTGTCCTTCATGACACCTATTATGTAGTTGCGCATTTCCACTATGTACTATCAATAGGTGCCGTATTCGCCATTATAGCAGCTTTCGTACACTGATTCCCCCTATTAACCGGATATACCCTACACAGCGCCTGAACAAAAATCCACTTTGCGGTTATGTTTATTGGGGTCAACCTCACATTCTTCCCACAACACTTCCTAGGCCTAGCAGGCATGCCACGACGATATTCTGACTATCCAGACGCCTACGCCCTGTGAAATACAGTATCATCTATTGGGTCACTAATCTCTTTAGTAGCAGTAATCATGTTCCTATTTATTCTATGAGAAGCCTTCGCCGCTAAACGGGAAGTACTATCCGTAGAACTAACAATAACAAATGTAGAATGACTTCACGGCTGCCCTCCCCCTTACCACACATACGAAGAACCAGCATTCGTACAAATTCAATCAAATTAA
>gi|1145139783|gb|KY319925.1| Poropuntius bolovenensis voucher SUC8783 cytochrome c oxidase subunit I (COI) gene, complete cds; mitochondrial
GTGGCAATCACGCGCTGATTCTTCTCTACTAACCACAAAGACATTGGTACCCTTTATCTTGTATTTGGTGCCTGAGCCGGAATAGTAGGAACCGCCTTAAGCCTTCTTATTCGGGCTGAACTTAGCCAACCCGGATCACTTCTAGGTGATGACCAAATTTATAACGTCATCGTTACCGCCCACGCCTTTGTAATAATTTTCTTTATAGTAATGCCTATCCTCATTGGAGGATTTGGGAACTGACTCGTGCCACTAATAATCGGAGCCCCAGACATAGCATTTCCACGAATAAATAACATAAGCTTTTGACTACTGCCCCCATCATTTCTGCTATTATTAGCCTCCTCTGGTGTTGAAGCTGGAGCTGGAACAGGGTGAACAGTATACCCACCTCTTGCAGGAAATCTGGCCCATGCAGGAGCATCAGTAGACCTGACAATTTTCTCGCTCCACTTAGCAGGTGTGTCATCAATTTTAGGTGCAATTAATTTTATTACCACAACTATTAACATGAAACCTCCAGCCATCTCCCAATATCAAACACCACTATTTGTCTGATCCGTGCTTGTAACCGCTGTATTACTCCTCCTATCATTACCTGTTTTAGCTGCCGGAATTACAATACTACTAACAGACCGAAACCTTAATACCACTTTCTTTGACCCAGCAGGTGGAGGGGACCCAATCCTTTACCAACACCTATTCTGATTCTTTGGGCACCCGAAAGTTTATATTCTTATTCTCCCGGGATTCGGAATTATTTCCCACGTCGTAGCCTACTACTCAGGTAAAAAAGAACCATTTGGTTATATAGGAATAGTTTGAGCCATAATGGCCATCGGCCTTCTAGGATTTATCGTATGGGCCCACCACATATTCACTGTTGGAATAGACGTAGACACTCGTGCATACTTCACATCTGCGACAATAATTATTGCAATTCCAACAGGTGTAAAAGTATTCAGCTGACTAGCCACACTTCACGGAGGGTCTATTAAATGAGAAACACCTATGCTATGGGCCCTAGGATTTATTTTCCTGTTCACAGTAGGTGGTTTAACAGGAATCGTCCTATCCAACTCATCACTAGACATTGTCCTTCATGACACCTATTATGTAGTTGCGCATTTCCACTATGTACTATCAATAGGTGCCGTATTCGCCATTATAGCAGCTTTCGTACACTGATTCCCCCTATTAACCGGATATACCCTACACAGCGCCTGAACAAAAATCCACTTTGCGGTTATGTTTATTGGGGTCAACCTCACATTCTTCCCACAACACTTCCTAGGCCTAGCAGGCATGCCACGACGATATTCTGACTATCCAGACGCCTACGCCCTGTGAAATACAGTATCATCTATTGGGTCACTAATCTCTTTAGTAGCAGTAATCATGTTCCTATTTATTCTATGAGAAGCCTTCGCCGCTAAACGGGAAGTACTATCCGTAGAACTAACAATAACAAATGTAGAATGACTTCACGGCTGCCCTCCCCCTTACCACACATACGAAGAACCAGCATTCGTACAAATTCAATCAAATTAA
>gi|1145139785|gb|KY319926.1| Poropuntius bolovenensis voucher SUC8784 cytochrome c oxidase subunit I (COI) gene, complete cds; mitochondrial
GTGGCAATCACGCGCTGATTCTTCTCTACTAACCACAAAGACATTGGTACCCTTTATCTTGTATTTGGTGCCTGAGCCGGAATAGTAGGAACCGCCTTAAGCCTTCTTATTCGGGCTGAACTTAGCCAACCCGGATCACTTCTAGGTGATGACCAAATTTATAACGTCATCGTTACCGCCCACGCCTTTGTAATAATTTTCTTTATAGTAATGCCTATCCTCATTGGAGGATTTGGGAACTGACTCGTGCCACTAATAATCGGAGCCCCAGACATAGCATTTCCACGAATAAATAACATAAGCTTTTGACTACTGCCCCCATCATTTCTGCTATTATTAGCCTCCTCTGGTGTTGAAGCTGGAGCTGGAACAGGGTGAACAGTATACCCACCTCTTGCAGGAAATCTGGCCCATGCAGGAGCATCAGTAGACCTGACAATTTTCTCGCTCCACTTAGCAGGTGTGTCATCAATTTTAGGTGCAATTAATTTTATTACCACAACTATTAACATGAAACCTCCAGCCATCTCCCAATATCAAACACCACTATTTGTCTGATCCGTGCTTGTAACCGCTGTATTACTCCTCCTATCATTACCTGTTTTAGCTGCCGGAATTACAATACTACTAACAGACCGAAACCTTAATACCACTTTCTTTGACCCAGCAGGTGGAGGGGACCCAATCCTTTACCAACACCTATTCTGATTCTTTGGGCACCCGAAAGTTTATATTCTTATTCTCCCGGGATTCGGAATTATTTCCCACGTCGTAGCCTACTACTCAGGTAAAAAAGAACCATTTGGTTATATAGGAATAGTTTGAGCCATAATGGCCATCGGCCTTCTAGGATTTATCGTATGGGCCCACCACATATTCACTGTTGGAATAGACGTAGACACTCGTGCATACTTCACATCTGCGACAATAATTATTGCAATTCCAACAGGTGTAAAAGTATTCAGCTGACTAGCCACACTTCACGGAGGGTCTATTAAATGAGAAACACCTATGCTATGGGCCCTAGGATTTATTTTCCTGTTCACAGTAGGTGGTTTAACAGGAATCGTCCTATCCAACTCATCACTAGACATTGTCCTTCATGACACCTATTATGTAGTTGCGCATTTCCACTATGTACTATCAATAGGTGCCGTATTCGCCATTATAGCAGCTTTCGTACACTGATTCCCCCTATTAACCGGATACACCCTACACAGCGCCTGAACAAAAATCCACTTTGCGGTTATGTTTATTGGGGTCAACCTCACATTCTTCCCACAACACTTCCTAGGCCTAGCAGGCATGCCACGACGATATTCTGACTATCCAGACGCCTACGCCCTGTGAAATACAGTATCATCTATTGGGTCACTAATCTCTTTAGTAGCAGTAATCATGTTCCTATTTATTCTATGAGAAGCCTTCGCCGCTAAACGGGAAGTACTATCCGTAGAACTAACAATAACAAATGTAGAATGACTTCACGGCTGCCCTCCCCCTTACCACACATACGAAGAACCAGCATTCGTACAAATTCAATCAAATTAA
>gi|1145139787|gb|KY319927.1| Poropuntius bolovenensis voucher SUC8785 cytochrome c oxidase subunit I (COI) gene, complete cds; mitochondrial
GTGGCAATCACGCGCTGATTCTTCTCTACTAACCACAAAGACATTGGTACCCTTTATCTTGTATTTGGTGCCTGAGCCGGAATAGTAGGAACCGCCTTAAGCCTTCTTATTCGGGCTGAACTTAGCCAACCCGGATCACTTCTAGGTGATGACCAAATTTATAACGTCATCGTTACCGCCCACGCCTTTGTAATAATTTTCTTTATAGTAATGCCTATCCTCATTGGAGGATTTGGGAACTGACTCGTGCCACTAATAATCGGAGCCCCAGACATAGCATTTCCACGAATAAATAACATAAGCTTTTGACTACTGCCCCCATCATTTCTGCTATTATTAGCCTCCTCTGGTGTTGAAGCTGGAGCTGGAACAGGGTGAACAGTATACCCACCTCTTGCAGGAAATCTGGCCCATGCAGGAGCATCAGTAGACCTGACAATTTTCTCGCTCCACTTAGCAGGTGTGTCATCAATTTTAGGTGCAATTAATTTTATTACCACAACTATTAACATGAAACCTCCAGCCATCTCCCAATATCAAACACCACTATTTGTCTGATCCGTGCTTGTAACCGCTGTATTACTCCTCCTATCATTACCTGTTTTAGCTGCCGGAATTACAATACTACTAACAGACCGAAACCTTAATACCACTTTCTTTGACCCAGCAGGTGGAGGGGACCCAATCCTTTACCAACACCTATTCTGATTCTTTGGGCACCCGAAAGTTTATATTCTTATTCTCCCGGGATTCGGAATTATTTCCCACGTCGTAGCCTACTACTCAGGTAAAAAAGAACCATTTGGTTATATAGGAATAGTTTGAGCCATAATGGCCATCGGCCTTCTAGGATTTATCGTATGGGCCCACCACATATTCACTGTTGGAATAGACGTAGACACTCGTGCATACTTCACATCTGCGACAATAATTATTGCAATTCCAACAGGTGTAAAAGTATTCAGCTGACTAGCCACACTTCACGGAGGGTCTATTAAATGAGAAACACCTATGCTATGGGCCCTAGGATTTATTTTCCTGTTCACAGTAGGTGGTTTAACAGGAATCGTCCTATCCAACTCATCACTAGACATTGTCCTTCATGACACCTATTATGTAGTTGCGCATTTCCACTATGTACTATCAATAGGTGCCGTATTCGCCATTATAGCAGCTTTCGTACACTGATTCCCCCTATTAACCGGATATACCCTACACAGCGCCTGAACAAAAATCCACTTTGCGGTTATGTTTATTGGGGTCAACCTCACATTCTTCCCACAACACTTCCTAGGCCTAGCAGGCATGCCACGACGATATTCTGACTATCCAGACGCCTACGCCCTGTGAAATACAGTATCATCTATTGGGTCACTAATCTCTTTAGTAGCAGTAATCATGTTCCTATTTATTCTATGAGAAGCCTTCGCCGCTAAACGGGAAGTACTATCCGTAGAACTAACAATAACAAATGTAGAATGACTTCACGGCTGCCCTCCCCCTTACCACACATACGAAGAACCAGCATTCGTACAAATTCAATCAAATTAA
>gi|1145139789|gb|KY319928.1| Poropuntius bolovenensis voucher SUC8786 cytochrome c oxidase subunit I (COI) gene, complete cds; mitochondrial
GTGGCAATCACGCGCTGATTCTTCTCTACTAACCACAAAGACATTGGTACCCTTTATCTTGTATTTGGTGCCTGAGCCGGAATAGTAGGAACCGCCTTAAGCCTTCTTATTCGGGCTGAACTTAGCCAACCCGGATCACTTCTAGGTGATGACCAAATTTATAACGTCATCGTTACCGCCCACGCCTTTGTAATAATTTTCTTTATAGTAATGCCTATCCTCATTGGAGGATTTGGGAACTGACTCGTGCCACTAATAATTGGAGCCCCAGACATAGCATTTCCACGAATAAATAACATAAGCTTTTGACTACTGCCCCCATCATTTCTGCTATTATTAGCCTCCTCTGGTGTTGAAGCTGGAGCTGGAACAGGGTGAACAGTATACCCACCTCTTGCAGGAAATCTGGCCCATGCAGGAGCATCAGTAGACCTGACAATTTTCTCGCTCCACTTAGCAGGTGTGTCATCAATTTTAGGTGCAATTAATTTTATTACCACAACTATTAACATGAAACCTCCAGCCATCTCCCAATATCAAACACCACTATTTGTCTGATCCGTGCTTGTAACCGCTGTATTACTCCTCCTATCATTACCTGTTTTAGCTGCCGGAATTACAATACTACTAACAGACCGAAACCTTAATACCACTTTCTTTGACCCAGCAGGTGGAGGGGACCCAATCCTTTACCAACACCTATTCTGATTCTTTGGGCACCCGAAAGTTTATATTCTTATTCTCCCGGGATTCGGAATTATTTCCCACGTCGTAGCCTACTACTCAGGTAAAAAAGAACCATTTGGTTATATAGGAATAGTTTGAGCCATAATGGCCATCGGCCTTCTAGGATTTATCGTATGGGCCCACCACATATTCACTGTTGGAATAGACGTAGACACTCGTGCATACTTCACATCTGCGACAATAATTATTGCAATTCCAACAGGTGTAAAAGTATTCAGCTGACTAGCCACACTTCACGGAGGGTCTATTAAATGAGAAACACCTATGCTATGGGCCCTAGGATTTATTTTCCTGTTCACAGTAGGTGGTTTAACAGGAATCGTCCTATCCAACTCATCACTAGACATTGTCCTTCATGACACCTATTATGTAGTTGCGCATTTCCACTATGTACTATCAATAGGTGCCGTATTCGCCATTATAGCAGCTTTCGTACACTGATTCCCCCTATTAACCGGATATACCCTACACAGCGCCTGAACAAAAATCCACTTTGCGGTTATGTTTATTGGGGTCAACCTCACATTCTTCCCACAACACTTCCTAGGCCTAGCAGGCATGCCACGACGATATTCTGACTACCCAGACGCCTACGCCCTGTGAAATACAGTATCATCTATTGGGTCACTAATCTCTTTAGTAGCAGTAATCATGTTCCTATTTATTCTATGAGAAGCCTTCGCCGCTAAACGGGAAGTACTATCCGTAGAACTAACAATAACAAATGTAGAATGACTTCACGGCTGCCCTCCCCCTTACCACACATACGAAGAACCAGCATTCGTACAAATTCAATCAAATTAA
>gi|1145139791|gb|KY319929.1| Poropuntius bolovenensis voucher SUC8787 cytochrome c oxidase subunit I (COI) gene, complete cds; mitochondrial
GTGGCAATCACGCGCTGATTCTTCTCTACTAACCACAAAGACATTGGTACCCTTTATCTTGTATTTGGTGCCTGAGCCGGAATAGTAGGAACCGCCTTAAGCCTTCTTATTCGGGCTGAACTTAGCCAACCCGGATCACTTCTAGGTGATGACCAAATTTATAACGTCATCGTTACCGCCCACGCCTTTGTAATAATTTTCTTTATAGTAATGCCTATCCTCATTGGAGGATTTGGGAACTGACTCGTGCCACTAATAATCGGAGCCCCAGACATAGCATTTCCACGAATAAATAACATAAGCTTTTGACTACTGCCCCCATCATTTCTGCTATTATTAGCCTCCTCTGGTGTTGAAGCTGGAGCTGGAACAGGGTGAACAGTATACCCACCTCTTGCAGGAAATCTGGCCCATGCAGGAGCATCAGTAGACCTGACAATTTTCTCGCTCCACTTAGCAGGTGTGTCATCAATTTTAGGTGCAATTAATTTTATTACCACAACTATTAACATGAAACCTCCAGCCATCTCCCAATATCAAACACCACTATTTGTCTGATCCGTGCTTGTAACCGCTGTATTACTCCTCCTATCATTACCTGTTTTAGCTGCCGGAATTACAATACTACTAACAGACCGAAACCTTAATACCACTTTCTTTGACCCAGCAGGTGGAGGGGACCCAATCCTTTACCAACACCTATTCTGATTCTTTGGGCACCCGAAAGTTTATATTCTTATTCTCCCGGGATTCGGAATTATTTCCCACGTCGTAGCCTACTACTCAGGTAAAAAAGAACCATTTGGTTATATAGGAATAGTTTGAGCCATAATGGCCATCGGCCTTCTAGGATTTATCGTATGGGCCCACCACATATTCACTGTTGGAATAGACGTAGACACTCGTGCATACTTCACATCTGCGACAATAATTATTGCAATTCCAACAGGTGTAAAAGTATTCAGCTGACTAGCCACACTTCACGGAGGGTCTATTAAATGAGAAACACCTATGCTATGGGCCCTAGGATTTATTTTCCTGTTCACAGTAGGTGGTTTAACAGGAATCGTCCTATCCAACTCATCACTAGACATTGTCCTTCATGACACCTATTATGTAGTTGCGCATTTCCACTATGTACTATCAATAGGTGCCGTATTCGCCATTATAGCAGCTTTCGTACACTGATTCCCCCTATTAACCGGATATACCCTACACAGCGCCTGAACAAAAATCCACTTTGCGGTTATGTTTATTGGGGTCAACCTCACATTCTTCCCACAACACTTCCTAGGCCTAGCAGGCATGCCACGACGATATTCTGACTATCCAGACGCCTACGCCCTGTGAAATACAGTATCATCTATTGGGTCACTAATCTCTTTAGTAGCAGTAATCATGTTCCTATTTATTCTATGAGAAGCCTTCGCCGCTAAACGGGAAGTACTATCCGTAGAACTAACAATAACAAATGTAGAATGACTTCACGGCTGCCCTCCCCCTTACCACACATACGAAGAACCAGCATTCGTACAAATTCAATCAAATTAA
>gi|1145139793|gb|KY319930.1| Poropuntius bolovenensis voucher SUC8788 cytochrome c oxidase subunit I (COI) gene, complete cds; mitochondrial
GTGGCAATCACGCGCTGATTCTTCTCTACTAACCACAAAGACATTGGTACCCTTTATCTTGTATTTGGTGCCTGAGCCGGAATAGTAGGAACCGCCTTAAGCCTTCTTATTCGGGCTGAACTTAGCCAACCCGGATCACTTCTAGGTGATGACCAAATTTATAACGTCATCGTTACCGCCCACGCCTTTGTAATAATTTTCTTTATAGTAATGCCTATCCTCATTGGAGGATTTGGGAACTGACTCGTGCCACTAATAATCGGAGCCCCAGACATAGCATTTCCACGAATAAATAACATAAGCTTTTGACTACTGCCCCCATCATTTCTGCTATTATTAGCCTCCTCTGGTGTTGAAGCTGGAGCTGGAACAGGGTGAACAGTATACCCACCTCTTGCAGGAAATCTGGCCCATGCAGGAGCATCAGTAGACCTGACAATTTTCTCGCTCCACTTAGCAGGTGTGTCATCAATTTTAGGTGCAATTAATTTTATTACCACAACTATTAACATGAAACCTCCAGCCATCTCCCAATATCAAACACCACTATTTGTCTGATCCGTGCTTGTAACCGCTGTATTACTCCTCCTATCATTACCTGTTTTAGCTGCCGGAATTACAATACTACTAACAGACCGAAACCTTAATACCACTTTCTTTGACCCAGCAGGTGGAGGGGACCCAATCCTTTACCAACACCTATTCTGATTCTTTGGGCACCCGAAAGTTTATATTCTTATTCTCCCGGGATTCGGAATTATTTCCCACGTCGTAGCCTACTACTCAGGTAAAAAAGAACCATTTGGTTATATAGGAATAGTTTGAGCCATAATGGCCATCGGCCTTCTAGGATTTATCGTATGGGCCCACCACATATTCACTGTTGGAATAGACGTAGACACTCGTGCATACTTCACATCTGCGACAATAATTATTGCAATTCCAACAGGTGTAAAAGTATTCAGCTGACTAGCCACACTTCACGGAGGGTCTATTAAATGAGAAACACCTATGCTATGGGCCCTAGGATTTATTTTCCTGTTCACAGTAGGTGGTTTAACAGGAATCGTCCTATCCAACTCATCACTAGACATTGTCCTTCATGACACCTATTATGTAGTTGCGCATTTCCACTATGTACTATCAATAGGTGCCGTATTCGCCATTATAGCAGCTTTCGTACACTGATTCCCCCTATTAACCGGATATACCCTACACAGCGCCTGAACAAAAATCCACTTTGCGGTTATGTTTATTGGGGTCAACCTCACATTCTTCCCACAACACTTCCTAGGCCTAGCAGGCATGCCACGACGATATTCTGACTATCCAGACGCCTACGCCCTGTGAAATACAGTATCATCTATTGGGTCACTAATCTCTTTAGTAGCAGTAATCATGTTCCTATTTATTCTATGAGAAGCCTTCGCCGCTAAACGGGAAGTACTATCCGTAGAACTAACAATAACAAATGTAGAATGACTTCACGGCTGCCCTCCCCCTTACCACACATACGAAGAACCAGCATTCGTACAAATTCAATCAAATTAA
>gi|1145139795|gb|KY319931.1| Poropuntius bolovenensis voucher SUC8789 cytochrome c oxidase subunit I (COI) gene, complete cds; mitochondrial
GTGGCAATCACGCGCTGATTCTTCTCTACTAACCACAAAGACATTGGTACCCTTTATCTTGTATTTGGTGCCTGAGCCGGAATAGTAGGAACCGCCTTAAGCCTTCTTATTCGGGCTGAACTTAGCCAACCCGGATCACTTCTAGGTGATGACCAAATTTATAACGTCATCGTTACCGCCCACGCCTTTGTAATAATTTTCTTTATAGTAATGCCTATCCTCATTGGAGGATTTGGGAACTGACTCGTGCCACTAATAATCGGAGCCCCAGACATAGCATTTCCACGAATAAATAACATAAGCTTTTGACTACTGCCCCCATCATTTCTGCTATTATTAGCCTCCTCTGGTGTTGAAGCTGGAGCTGGAACAGGGTGAACAGTATACCCACCTCTTGCAGGAAATCTGGCCCATGCAGGAGCATCAGTAGACCTGACAATTTTCTCGCTCCACTTAGCAGGTGTGTCATCAATTTTAGGTGCAATTAATTTTATTACCACAACTATTAACATGAAACCTCCAGCCATCTCCCAATATCAAACACCACTATTTGTCTGATCCGTGCTTGTAACCGCTGTATTACTCCTCCTATCATTACCTGTTTTAGCTGCCGGAATTACAATACTACTAACAGACCGAAACCTTAATACCACTTTCTTTGACCCAGCAGGTGGAGGGGACCCAATCCTTTACCAACACCTATTCTGATTCTTTGGGCACCCGAAAGTTTATATTCTTATTCTCCCGGGATTCGGAATTATTTCCCACGTCGTAGCCTACTACTCAGGTAAAAAAGAACCATTTGGTTATATAGGAATAGTTTGAGCCATAATGGCCATCGGCCTTCTAGGATTTATCGTATGGGCCCACCACATATTCACTGTTGGAATAGACGTAGACACTCGTGCATACTTCACATCTGCGACAATAATTATTGCAATTCCAACAGGTGTAAAAGTATTCAGCTGACTAGCCACACTTCACGGAGGGTCTATTAAATGAGAAACACCTATGCTATGGGCCCTAGGATTTATTTTCCTGTTCACAGTAGGTGGTTTAACAGGAATCGTCCTATCCAACTCATCACTAGACATTGTCCTTCATGACACCTATTATGTAGTTGCGCATTTCCACTATGTATTATCAATAGGTGCCGTATTCGCCATTATAGCAGCTTTCGTACACTGATTCCCCCTATTAACCGGATATACCCTACACAGCGCCTGAACAAAAATCCACTTTGCGGTTATGTTTATTGGGGTCAACCTCACATTCTTCCCACAACACTTCCTAGGCCTAGCAGGCATGCCACGACGATATTCTGACTACCCAGACGCCTACGCCCTGTGAAATACAGTATCATCTATTGGGTCACTAATCTCTTTAGTAGCAGTAATCATGTTCCTATTTATTCTATGAGAAGCCTTCGCCGCTAAACGGGAAGTACTATCCGTAGAACTAACAATAACAAATGTAGAATGACTTCACGGCTGCCCTCCCCCTTACCACACATACGAAGAACCAGCATTCGTACAAATTCAATCAAATTAA
>gi|1145139797|gb|KY319932.1| Poropuntius bolovenensis voucher SUC8790 cytochrome c oxidase subunit I (COI) gene, complete cds; mitochondrial
GTGGCAATCACGCGCTGATTCTTCTCTACTAACCACAAAGACATTGGTACCCTTTATCTTGTATTTGGTGCCTGAGCCGGAATAGTAGGAACCGCCTTAAGCCTTCTTATTCGGGCTGAACTTAGCCAACCCGGATCACTTCTAGGTGATGACCAAATTTATAACGTCATCGTTACCGCCCACGCCTTTGTAATAATTTTCTTTATAGTAATGCCTATCCTCATTGGAGGATTTGGGAACTGACTCGTGCCACTAATAATCGGAGCCCCAGACATAGCATTTCCACGAATAAATAACATAAGCTTTTGACTACTGCCCCCATCATTTCTGCTATTATTAGCCTCCTCTGGTGTTGAAGCTGGAGCTGGAACAGGGTGAACAGTATACCCACCTCTTGCAGGAAATCTGGCCCATGCAGGAGCATCAGTAGACCTGACAATTTTCTCGCTCCACTTAGCAGGTGTGTCATCAATTTTAGGTGCAATTAATTTTATTACCACAACTATTAACATGAAACCTCCAGCCATCTCCCAATATCAAACACCACTATTTGTCTGATCCGTGCTTGTAACCGCTGTATTACTCCTCCTATCATTACCTGTTTTAGCTGCCGGAATTACAATACTACTAACAGACCGAAACCTTAATACCACTTTCTTTGACCCAGCAGGTGGAGGGGACCCAATCCTTTACCAACACCTATTCTGATTCTTTGGGCACCCGAAAGTTTATATTCTTATTCTCCCGGGATTCGGAATTATTTCCCACGTCGTAGCCTACTACTCAGGTAAAAAAGAACCATTTGGTTATATAGGAATAGTTTGAGCCATAATGGCCATCGGCCTTCTAGGATTTATCGTATGGGCCCACCACATATTCACTGTTGGAATAGACGTAGACACTCGTGCATACTTCACATCTGCGACAATAATTATTGCAATTCCAACAGGTGTAAAAGTATTCAGCTGACTAGCCACACTTCACGGAGGGTCTATTAAATGAGAAACACCTATGCTATGGGCCCTAGGATTTATTTTCCTGTTCACAGTAGGTGGTTTAACAGGAATCGTCCTATCCAACTCATCACTAGACATTGTCCTTCATGACACCTATTATGTAGTTGCGCATTTCCACTATGTATTATCAATAGGTGCCGTATTCGCCATTATAGCAGCTTTCGTACACTGATTCCCCCTATTAACCGGATATACCCTACACAGCGCCTGAACAAAAATCCACTTTGCGGTTATGTTTATTGGGGTCAACCTCACATTCTTCCCACAACACTTCCTAGGCCTAGCAGGCATGCCACGACGATATTCTGACTACCCAGACGCCTACGCCCTGTGAAATACAGTATCATCTATTGGGTCACTAATCTCTTTAGTAGCAGTAATCATGTTCCTATTTATTCTATGAGAAGCCTTCGCCGCTAAACGGGAAGTACTATCCGTAGAACTAACAATAACAAATGTAGAATGACTTCACGGCTGCCCTCCCCCTTACCACACATACGAAGAACCAGCATTCGTACAAATTCAATCAAATTAA
>gi|1145139799|gb|KY319933.1| Poropuntius bolovenensis voucher SUC8791 cytochrome c oxidase subunit I (COI) gene, complete cds; mitochondrial
GTGGCAATCACGCGCTGATTCTTCTCTACTAACCACAAAGACATTGGTACCCTTTATCTTGTATTTGGTGCCTGAGCCGGAATAGTAGGAACCGCCTTAAGCCTTCTTATTCGGGCTGAACTTAGCCAACCCGGATCACTTCTAGGTGATGACCAAATTTATAACGTCATCGTTACCGCCCACGCCTTTGTAATAATTTTCTTTATAGTAATGCCTATCCTCATTGGAGGATTTGGGAACTGACTCGTGCCACTAATAATCGGAGCCCCAGACATAGCATTTCCACGAATAAATAACATAAGCTTTTGACTACTGCCCCCATCATTTCTGCTATTATTAGCCTCCTCTGGTGTTGAAGCTGGAGCTGGAACAGGGTGAACAGTATACCCACCTCTTGCAGGAAATCTGGCCCATGCAGGAGCATCAGTAGACCTGACAATTTTCTCGCTCCACTTAGCAGGTGTGTCATCAATTTTAGGTGCAATTAATTTTATTACCACAACTATTAACATGAAACCTCCAGCCATCTCCCAATATCAAACACCACTATTTGTCTGATCCGTGCTTGTAACCGCTGTATTACTCCTCCTATCATTACCTGTTTTAGCTGCCGGAATTACAATACTACTAACAGACCGAAACCTTAATACCACTTTCTTTGACCCAGCAGGTGGAGGGGACCCAATCCTTTACCAACACCTATTCTGATTCTTTGGGCACCCGAAAGTTTATATTCTTATTCTCCCGGGATTCGGAATTATTTCCCACGTCGTAGCCTACTACTCAGGTAAAAAAGAACCATTTGGTTATATAGGAATAGTTTGAGCCATAATGGCCATCGGCCTTCTAGGATTTATCGTATGGGCCCACCACATATTCACTGTTGGAATAGACGTAGACACTCGTGCATACTTCACATCTGCGACAATAATTATTGCAATTCCAACAGGTGTAAAAGTATTCAGCTGACTAGCCACACTTCACGGAGGGTCTATTAAATGAGAAACACCTATGCTATGGGCCCTAGGATTTATTTTCCTGTTCACAGTAGGTGGTTTAACAGGAATCGTCCTATCCAACTCATCACTAGACATTGTCCTTCATGACACCTATTATGTAGTTGCGCATTTCCACTATGTACTATCAATAGGTGCCGTATTCGCCATTATAGCAGCTTTCGTACACTGATTCCCCCTATTAACCGGATATACCCTACACAGCGCCTGAACAAAAATCCACTTTGCGGTTATGTTTATTGGGGTCAACCTCACATTCTTCCCACAACACTTCCTAGGCCTAGCAGGCATGCCACGACGATATTCTGACTATCCAGACGCCTACGCCCTGTGAAATACAGTATCATCTATTGGGTCACTAATCTCTTTAGTAGCAGTAATCATGTTCCTATTTATTCTATGAGAAGCCTTCGCCGCTAAACGGGAAGTACTATCCGTAGAACTAACAATAACAAATGTAGAATGACTTCACGGCTGCCCTCCCCCTTACCACACATACGAAGAACCAGCATTCGTACAAATTCAATCAAATTAA
>gi|1145139801|gb|KY319934.1| Poropuntius bolovenensis voucher SUC8792 cytochrome c oxidase subunit I (COI) gene, complete cds; mitochondrial
GTGGCAATCACGCGCTGATTCTTCTCTACTAACCACAAAGACATTGGTACCCTTTATCTTGTATTTGGTGCCTGAGCCGGAATAGTAGGAACCGCCTTAAGCCTTCTTATTCGGGCTGAACTTAGCCAACCCGGATCACTTCTAGGTGATGACCAAATTTATAACGTCATCGTTACCGCCCACGCCTTTGTAATAATTTTCTTTATAGTAATGCCTATCCTCATTGGAGGATTTGGGAACTGACTCGTGCCACTAATAATCGGAGCCCCAGACATAGCATTTCCACGAATAAATAACATAAGCTTTTGACTACTGCCCCCATCATTTCTGCTATTATTAGCCTCCTCTGGTGTTGAAGCTGGAGCTGGAACAGGGTGAACAGTATACCCACCTCTTGCAGGAAATCTGGCCCATGCAGGAGCATCAGTAGACCTGACAATTTTCTCGCTCCACTTAGCAGGTGTGTCATCAATTTTAGGTGCAATTAATTTTATTACCACAACTATTAACATGAAACCTCCAGCCATCTCCCAGTATCAAACACCACTATTTGTCTGATCCGTGCTTGTAACCGCTGTATTACTCCTCCTATCATTACCTGTTTTAGCTGCCGGAATTACAATACTACTAACAGACCGAAACCTTAATACCACTTTCTTTGACCCAGCAGGTGGAGGGGACCCAATCCTTTACCAACACCTATTCTGATTCTTTGGGCACCCGAAAGTTTATATTCTTATTCTCCCGGGATTCGGAATTATTTCCCACGTCGTAGCCTACTACTCAGGTAAAAAAGAACCATTTGGTTATATAGGAATAGTTTGAGCCATAATGGCCATCGGCCTTCTAGGATTTATCGTATGGGCCCACCACATATTCACTGTTGGAATAGACGTAGACACTCGTGCATACTTCACATCTGCGACAATAATTATTGCAATTCCAACAGGTGTAAAAGTATTCAGCTGACTAGCCACACTTCACGGAGGGTCTATTAAATGAGAAACACCTATGCTATGGGCCCTAGGATTTATTTTCCTGTTCACAGTAGGTGGTTTAACAGGAATCGTCCTATCCAACTCATCACTAGACATTGTCCTTCATGACACCTATTATGTAGTTGCGCATTTCCACTATGTATTATCAATAGGTGCCGTATTCGCCATTATAGCAGCTTTCGTACACTGATTCCCCCTATTAACCGGATATACCCTACACAGCGCCTGAACAAAAATCCACTTTGCGGTTATGTTTATTGGGGTCAACCTCACATTCTTCCCACAACACTTCCTAGGCCTAGCAGGCATGCCACGACGATATTCTGACTATCCAGACGCCTACGCCCTGTGAAATACAGTATCATCTATTGGGTCACTAATCTCTTTAGTAGCAGTAATCATGTTCCTATTTATTCTATGAGAAGCCTTCGCCGCTAAACGGGAAGTACTATCCGTAGAACTAACAATAACAAATGTAGAATGACTTCACGGCTGCCCTCCCCCTTACCACACATACGAAGAACCAGCATTCGTACAAATTCAATCAAATTAA
>gi|1145139803|gb|KY319935.1| Poropuntius bolovenensis voucher SUC8793 cytochrome c oxidase subunit I (COI) gene, complete cds; mitochondrial
GTGGCAATCACGCGCTGATTCTTCTCTACTAACCACAAAGACATTGGTACCCTTTATCTTGTATTTGGTGCCTGAGCCGGAATAGTAGGAACCGCCTTAAGCCTTCTTATTCGGGCTGAACTTAGCCAACCCGGATCACTTCTAGGTGATGACCAAATTTATAACGTCATCGTTACCGCCCACGCCTTTGTAATAATTTTCTTTATAGTAATGCCTATCCTCATTGGAGGATTTGGGAACTGACTCGTGCCACTAATAATTGGAGCCCCAGACATAGCATTTCCACGAATAAATAACATAAGCTTTTGACTACTGCCCCCATCATTTCTGCTATTATTAGCCTCCTCTGGTGTTGAAGCTGGAGCTGGAACAGGGTGAACAGTATACCCACCTCTTGCAGGAAATCTGGCCCATGCAGGAGCATCAGTAGACCTGACAATTTTCTCGCTCCACTTAGCAGGTGTGTCATCAATTTTAGGTGCAATTAATTTTATTACCACAACTATTAACATGAAACCTCCAGCCATCTCCCAATATCAAACACCACTATTTGTCTGATCCGTGCTTGTAACCGCTGTATTACTCCTCCTATCATTACCTGTTTTAGCTGCCGGAATTACAATACTACTAACAGACCGAAACCTTAATACCACTTTCTTTGACCCAGCAGGTGGAGGGGACCCAATCCTTTACCAACACCTATTCTGATTCTTTGGGCACCCGAAAGTTTATATTCTTATTCTCCCGGGATTCGGAATTATTTCCCACGTCGTAGCCTACTACTCAGGTAAAAAAGAACCATTTGGTTATATAGGAATAGTTTGAGCCATAATGGCCATCGGCCTTCTAGGATTTATCGTATGGGCCCACCACATATTCACTGTTGGAATAGACGTAGACACTCGTGCATACTTCACATCTGCGACAATAATTATTGCAATTCCAACAGGTGTAAAAGTATTCAGCTGACTAGCCACACTTCACGGAGGGTCTATTAAATGAGAAACACCTATGCTATGGGCCCTAGGATTTATTTTCCTGTTCACAGTAGGTGGTTTAACAGGAATCGTCCTATCCAACTCATCACTAGACATTGTCCTTCATGACACCTATTATGTAGTTGCGCATTTCCACTATGTACTATCAATAGGTGCCGTATTCGCCATTATAGCAGCTTTCGTACACTGATTCCCCCTATTAACCGGATATACCCTACACAGCGCCTGAACAAAAATCCACTTTGCGGTTATGTTTATTGGGGTCAACCTCACATTCTTCCCACAACACTTCCTAGGCCTAGCAGGCATGCCACGACGATATTCTGACTACCCAGACGCCTACGCCCTGTGAAATACAGTATCATCTATTGGGTCACTAATCTCTTTAGTAGCAGTAATCATGTTCCTATTTATTCTATGAGAAGCCTTCGCCGCTAAACGGGAAGTACTATCCGTAGAACTAACAATAACAAATGTAGAATGACTTCACGGCTGCCCTCCCCCTTACCACACATACGAAGAACCAGCATTCGTACAAATTCAATCAAATTAA
>gi|1145139805|gb|KY319936.1| Poropuntius bolovenensis voucher SUC8794 cytochrome c oxidase subunit I (COI) gene, complete cds; mitochondrial
GTGGCAATCACGCGCTGATTCTTCTCTACTAACCACAAAGACATTGGTACCCTTTATCTTGTATTTGGTGCCTGAGCCGGAATAGTAGGAACCGCCTTAAGCCTTCTTATTCGGGCTGAACTTAGCCAACCCGGATCACTTCTAGGTGATGACCAAATTTATAACGTCATCGTTACCGCCCACGCCTTTGTAATAATTTTCTTTATAGTAATGCCTATCCTCATTGGAGGATTTGGGAACTGACTCGTGCCACTAATAATCGGAGCCCCAGACATAGCATTTCCACGAATAAATAACATAAGCTTTTGACTACTGCCCCCATCATTTCTGCTATTATTAGCCTCCTCTGGTGTTGAAGCTGGAGCTGGAACAGGGTGAACAGTATACCCACCTCTTGCAGGAAATCTGGCCCATGCAGGAGCATCAGTAGACCTGACAATTTTCTCGCTCCACTTAGCAGGTGTGTCATCAATTTTAGGTGCAATTAATTTTATTACCACAACTATTAACATGAAACCTCCAGCCATCTCCCAGTATCAAACACCACTATTTGTCTGATCCGTGCTTGTAACCGCTGTATTACTCCTCCTATCATTACCTGTTTTAGCTGCCGGAATTACAATACTACTAACAGACCGAAACCTTAATACCACTTTCTTTGACCCAGCAGGTGGAGGGGACCCAATCCTTTACCAACACCTATTCTGATTCTTTGGGCACCCGAAAGTTTATATTCTTATTCTCCCGGGATTCGGAATTATTTCCCACGTCGTAGCCTACTACTCAGGTAAAAAAGAACCATTTGGTTATATAGGAATAGTTTGAGCCATAATGGCCATCGGCCTTCTAGGATTTATCGTATGGGCCCACCACATATTCACTGTTGGAATAGACGTAGACACTCGTGCATACTTCACATCTGCGACAATAATTATTGCAATTCCAACAGGTGTAAAAGTATTCAGCTGACTAGCCACACTTCACGGAGGGTCTATTAAATGAGAAACACCTATGCTATGGGCCCTAGGATTTATTTTCCTGTTCACAGTAGGTGGTTTAACAGGAATCGTCCTATCCAACTCATCACTAGACATTGTCCTTCATGACACCTATTATGTAGTTGCGCATTTCCACTATGTATTATCAATAGGTGCCGTATTCGCCATTATAGCAGCTTTCGTACACTGATTCCCCCTATTAACCGGATATACCCTACACAGCGCCTGAACAAAAATCCACTTTGCGGTTATGTTTATTGGGGTCAACCTCACATTCTTCCCACAACACTTCCTAGGCCTAGCAGGCATGCCACGACGATATTCTGACTATCCAGACGCCTACGCCCTGTGAAATACAGTATCATCTATTGGGTCACTAATCTCTTTAGTAGCAGTAATCATGTTCCTATTTATTCTATGAGAAGCCTTCGCCGCTAAACGGGAAGTACTATCCGTAGAACTAACAATAACAAATGTAGAATGACTTCACGGCTGCCCTCCCCCTTACCACACATACGAAGAACCAGCATTCGTACAAATTCAATCAAATTAA
>gi|1145139807|gb|KY319937.1| Poropuntius bolovenensis voucher SUC8795 cytochrome c oxidase subunit I (COI) gene, complete cds; mitochondrial
GTGGCAATCACGCGCTGATTCTTCTCTACTAACCACAAAGACATTGGTACCCTTTATCTTGTATTTGGTGCCTGAGCCGGAATAGTAGGAACCGCCTTAAGCCTTCTTATTCGGGCTGAACTTAGCCAACCCGGATCACTTCTAGGTGATGACCAAATTTATAACGTCATCGTTACCGCCCACGCCTTTGTAATAATTTTCTTTATAGTAATGCCTATCCTCATTGGAGGATTTGGGAACTGACTCGTGCCACTAATAATCGGAGCCCCAGACATAGCATTTCCACGAATAAATAACATAAGCTTTTGACTACTGCCCCCATCATTTCTGCTATTATTAGCCTCCTCTGGTGTTGAAGCTGGAGCTGGAACAGGGTGAACAGTATACCCACCTCTTGCAGGAAATCTGGCCCATGCAGGAGCATCAGTAGACCTGACAATTTTCTCGCTCCACTTAGCAGGTGTGTCATCAATTTTAGGTGCAATTAATTTTATTACCACAACTATTAACATGAAACCTCCAGCCATCTCCCAATATCAAACACCACTATTTGTCTGATCCGTGCTTGTAACCGCTGTATTACTCCTCCTATCATTACCTGTTTTAGCTGCCGGAATTACAATACTACTAACAGACCGAAACCTTAATACCACTTTCTTTGACCCAGCAGGTGGAGGGGACCCAATCCTTTACCAACACCTATTCTGATTCTTTGGGCACCCGAAAGTTTATATTCTTATTCTCCCGGGATTCGGAATTATTTCCCACGTCGTAGCCTACTACTCAGGTAAAAAAGAACCATTTGGTTATATAGGAATAGTTTGAGCCATAATGGCCATCGGCCTTCTAGGATTTATCGTATGGGCCCACCACATATTCACTGTTGGAATAGACGTAGACACTCGTGCATACTTCACATCTGCGACAATAATTATTGCAATTCCAACAGGTGTAAAAGTATTCAGCTGACTAGCCACACTTCACGGAGGGTCTATTAAATGAGAAACACCTATGCTATGGGCCCTAGGATTTATTTTCCTGTTCACAGTAGGTGGTTTAACAGGAATCGTCCTATCCAACTCATCACTAGACATTGTCCTTCATGACACCTATTATGTAGTTGCGCATTTCCACTATGTACTATCAATAGGTGCCGTATTCGCCATTATAGCAGCTTTCGTACACTGATTCCCCCTATTAACCGGATATACCCTACACAGCGCCTGAACAAAAATCCACTTTGCGGTTATGTTTATTGGGGTCAACCTCACATTCTTCCCACAACACTTCCTAGGCCTAGCAGGCATGCCACGACGATATTCTGACTATCCAGACGCCTACGCCCTGTGAAATACAGTATCATCTATTGGGTCACTAATCTCTTTAGTAGCAGTAATCATGTTCCTATTTATTCTATGAGAAGCCTTCGCCGCTAAACGGGAAGTACTATCCGTAGAACTAACAATAACAAATGTAGAATGACTTCACGGCTGCCCTCCCCCTTACCACACATACGAAGAACCAGCATTCGTACAAATTCAATCAAATTAA
>gi|1145139809|gb|KY319938.1| Poropuntius bolovenensis voucher SUC8796 cytochrome c oxidase subunit I (COI) gene, complete cds; mitochondrial
GTGGCAATCACGCGCTGATTCTTCTCTACTAACCACAAAGACATTGGTACCCTTTATCTTGTATTTGGTGCCTGAGCCGGAATAGTAGGAACCGCCTTAAGCCTTCTTATTCGGGCTGAACTTAGCCAACCCGGATCACTTCTAGGTGATGACCAAATTTATAACGTCATCGTTACCGCCCACGCCTTTGTAATAATTTTCTTTATAGTAATGCCTATCCTCATTGGAGGATTTGGGAACTGACTCGTGCCACTAATAATCGGAGCCCCAGACATAGCATTTCCACGAATAAATAACATAAGCTTTTGACTACTGCCCCCATCATTTCTGCTATTATTAGCCTCCTCTGGTGTTGAAGCTGGAGCTGGAACAGGGTGAACAGTATACCCACCTCTTGCAGGAAATCTGGCCCATGCAGGAGCATCAGTAGACCTGACAATTTTCTCGCTCCACTTAGCAGGTGTGTCATCAATTTTAGGTGCAATTAATTTTATTACCACAACTATTAACATGAAACCTCCAGCCATCTCCCAATATCAAACACCACTATTTGTCTGATCCGTGCTTGTAACCGCTGTATTACTCCTCCTATCATTACCTGTTTTAGCTGCCGGAATTACAATACTACTAACAGACCGAAACCTTAATACCACTTTCTTTGACCCAGCAGGTGGAGGGGACCCAATCCTTTACCAACACCTATTCTGATTCTTTGGGCACCCGAAAGTTTATATTCTTATTCTCCCGGGATTCGGAATTATTTCCCACGTCGTAGCCTACTACTCAGGTAAAAAAGAACCATTTGGTTATATAGGAATAGTTTGAGCCATAATGGCCATCGGCCTTCTAGGATTTATCGTATGGGCCCACCACATATTCACTGTTGGAATAGACGTAGACACTCGTGCATACTTCACATCTGCGACAATAATTATTGCAATTCCAACAGGTGTAAAAGTATTCAGCTGACTAGCCACACTTCACGGAGGGTCTATTAAATGAGAAACACCTATGCTATGGGCCCTAGGATTTATTTTCCTGTTCACAGTAGGTGGTTTAACAGGAATCGTCCTATCCAACTCATCACTAGACATTGTCCTTCATGACACCTATTATGTAGTTGCGCATTTCCACTATGTACTATCAATAGGTGCCGTATTCGCCATTATAGCAGCTTTCGTACACTGATTCCCCCTATTAACCGGATATACCCTACACAGCGCCTGAACAAAAATCCACTTTGCGGTTATGTTTATTGGGGTCAACCTCACATTCTTCCCACAACACTTCCTAGGCCTAGCAGGCATGCCACGACGATATTCTGACTATCCAGACGCCTACGCCCTGTGAAATACAGTATCATCTATTGGGTCACTAATCTCTTTAGTAGCAGTAATCATGTTCCTATTTATTCTATGAGAAGCCTTCGCCGCTAAACGGGAAGTACTATCCGTAGAACTAACAATAACAAATGTAGAATGACTTCACGGCTGCCCTCCCCCTTACCACACATACGAAGAACCAGCATTCGTACAAATTCAATCAAATTAA
>gi|1145139811|gb|KY319939.1| Poropuntius lobocheiloides voucher SUC0321.01 cytochrome c oxidase subunit I (COI) gene, complete cds; mitochondrial
GTGGCAATCACGCGCTGATTCTTCTCTACTAACCACAAAGACATTGGTACCCTTTATCTTGTATTTGGTGCCTGAGCCGGAATAGTAGGAACCGCCTTAAGCCTTCTTATTCGGGCTGAACTTAGCCAACCCGGATCACTTCTAGGTGATGACCAAATTTATAACGTCATCGTTACCGCCCACGCCTTTGTAATAATTTTCTTTATAGTAATGCCTATCCTCATTGGAGGATTTGGGAACTGACTCGTGCCACTAATAATCGGAGCCCCAGACATAGCATTTCCACGAATAAATAACATAAGCTTTTGACTACTGCCCCCATCATTTCTGCTATTATTAGCCTCCTCTGGTGTTGAAGCTGGAGCTGGAACAGGGTGAACAGTATACCCACCTCTTGCAGGAAATCTGGCCCATGCAGGAGCATCAGTAGACCTGACAATTTTCTCGCTCCACTTAGCAGGTGTGTCATCAATTTTAGGTGCAATTAATTTTATTACCACAACTATTAACATGAAACCTCCAGCCATCTCCCAATATCAAACACCACTATTTGTCTGATCCGTGCTTGTAACCGCTGTATTACTCCTCCTATCATTACCTGTTTTAGCTGCCGGAATTACAATACTACTAACAGACCGAAACCTTAATACCACTTTCTTTGACCCAGCAGGTGGAGGAGACCCAATCCTTTACCAACACCTATTCTGATTCTTTGGGCACCCGGAAGTCTATATTCTTATTCTCCCGGGATTCGGAATTATTTCCCACGTCGTAGCCTACTACTCAGGTAAAAAAGAACCATTTGGTTATATAGGAATAGTTTGAGCCATAATGGCCATCGGCCTTCTAGGATTTATCGTATGGGCCCACCACATATTCACTGTTGGAATAGACGTAGACACTCGTGCATACTTCACATCTGCGACAATAATTATTGCAATTCCAACAGGTGTAAAAGTATTCAGCTGACTAGCCACACTTCACGGAGGGTCTATTAAATGAGAAACACCTATGCTATGGGCCCTAGGATTTATTTTCCTGTTCACAGTAGGTGGTTTAACAGGAATCGTCCTATCCAACTCATCACTAGACATTGTCCTTCATGACACCTATTATGTAGTTGCGCATTTCCACTATGTACTATCAATAGGTGCCGTATTCGCCATTATAGCAGCTTTCGTACACTGATTCCCCCTATTAACCGGATATACCCTACACAGCGCCTGAACAAAAATCCACTTTGCGGTTATGTTTATTGGGGTCAACCTCACATTCTTCCCACAACACTTCCTAGGCCTAGCAGGCATGCCACGACGATATTCTGACTATCCAGACGCCTACGCCCTGTGAAATACAGTATCATCTATTGGGTCACTAATCTCTTTAGTAGCAGTAATCATGTTCCTATTTATCCTATGAGAAGCCTTCGCCGCTAAACGGGAAGTACTATCCGTAGAACTAACAATAACAAATGTAGAATGACTTCACGGCTGCCCTCCCCCTTACCACACATACGAAGAACCAGCATTCGTACAAATTCAATCAAATTAA
>gi|1145139813|gb|KY319940.1| Poropuntius lobocheiloides voucher SUC0312.02 cytochrome c oxidase subunit I (COI) gene, complete cds; mitochondrial
GTGGCAATCACGCGCTGATTCTTCTCTACTAACCACAAAGACATTGGTACCCTTTATCTTGTATTTGGTGCCTGAGCCGGAATAGTAGGAACCGCCTTAAGCCTTCTTATTCGGGCTGAACTTAGCCAACCCGGATCACTTCTAGGTGATGACCAAATTTATAACGTCATCGTTACCGCCCACGCCTTTGTAATAATTTTCTTTATAGTAATGCCTATCCTCATTGGAGGATTTGGGAACTGACTCGTGCCACTAATAATCGGAGCCCCAGACATAGCATTTCCACGAATAAATAACATAAGCTTTTGACTACTGCCCCCATCATTTCTGCTATTATTAGCCTCCTCTGGTGTTGAAGCTGGAGCTGGAACAGGGTGAACAGTATACCCACCTCTTGCAGGAAATCTGGCCCATGCAGGAGCATCAGTAGACCTGACAATTTTCTCGCTCCACTTAGCAGGTGTGTCATCAATTTTAGGTGCAATTAATTTTATTACCACAACTATTAACATGAAACCTCCAGCCATCTCCCAATATCAAACACCACTATTTGTCTGATCCGTGCTTGTAACCGCTGTATTACTCCTCCTATCATTACCTGTTTTAGCTGCCGGAATTACAATACTACTAACAGACCGAAACCTTAATACCACTTTCTTTGACCCAGCAGGTGGAGGAGACCCAATCCTTTACCAACACCTATTCTGATTCTTTGGGCACCCGGAAGTCTATATTCTTATTCTCCCGGGATTCGGAATTATTTCCCACGTCGTAGCCTACTACTCAGGTAAAAAAGAACCATTTGGTTATATAGGAATAGTTTGAGCCATAATGGCCATCGGCCTTCTAGGATTTATCGTATGGGCCCACCACATATTCACTGTTGGAATAGACGTAGACACTCGTGCATACTTCACATCTGCGACAATAATTATTGCAATTCCAACAGGTGTAAAAGTATTCAGCTGACTAGCCACACTTCACGGAGGGTCTATTAAATGAGAAACACCTATGCTATGGGCCCTAGGATTTATTTTCCTGTTCACAGTAGGTGGTTTAACAGGAATCGTCCTATCCAACTCATCACTAGACATTGTCCTTCATGACACCTATTATGTAGTTGCGCATTTCCACTATGTACTATCAATAGGTGCCGTATTCGCCATTATAGCAGCTTTCGTACACTGATTCCCCCTATTAACCGGATATACCCTACACAGCGCCTGAACAAAAATCCACTTTGCGGTTATGTTTATTGGGGTCAACCTCACATTCTTCCCACAACACTTCCTAGGCCTAGCAGGCATGCCACGACGATATTCTGACTACCCAGACGCCTACGCCCTGTGAAATACAGTATCATCTATTGGGTCACTAATCTCTTTAGTAGCAGTAATCATGTTCCTATTTATTCTATGAGAAGCCTTCGCCGCTAAACGGGAAGTACTATCCGTAGAACTAACAATAACAAATGTAGAATGACTTCACGGCTGCCCTCCCCCTTACCACACATACGAAGAACCAGCATTCGTACAAATTCAATCAAATTAA
>gi|1145139815|gb|KY319941.1| Poropuntius lobocheiloides voucher SUC8755 cytochrome c oxidase subunit I (COI) gene, complete cds; mitochondrial
GTGGCAATCACGCGCTGATTCTTCTCTACTAACCACAAAGACATTGGTACCCTTTATCTTGTATTTGGTGCCTGAGCCGGAATAGTAGGAACCGCCTTAAGCCTTCTTATTCGGGCTGAACTTAGCCAACCCGGATCACTTCTAGGTGATGACCAAATTTATAACGTCATCGTTACCGCCCACGCCTTTGTAATAATTTTCTTTATAGTAATGCCTATCCTCATTGGAGGATTTGGGAACTGACTCGTGCCACTAATAATCGGAGCCCCAGACATAGCATTTCCACGAATAAATAACATAAGCTTTTGACTACTGCCCCCATCATTTCTGCTATTATTAGCCTCCTCTGGTGTTGAAGCTGGAGCTGGAACAGGGTGAACAGTATACCCACCTCTTGCAGGAAATCTGGCCCATGCAGGAGCATCAGTAGACCTGACAATTTTCTCGCTCCACTTAGCAGGTGTGTCATCAATTTTAGGTGCAATTAATTTTATTACCACAACTATTAACATGAAACCTCCAGCCATCTCCCAATATCAAACACCACTATTTGTCTGATCCGTGCTTGTAACCGCTGTATTACTCCTCCTATCATTACCTGTTTTAGCTGCCGGAATTACAATACTACTAACAGACCGAAACCTTAATACCACTTTCTTTGACCCAGCAGGTGGAGGGGACCCAATCCTTTACCAACACCTATTCTGATTCTTTGGGCACCCGAAAGTTTATATTCTTATTCTCCCGGGATTCGGAATTATTTCCCACGTCGTAGCCTACTACTCAGGTAAAAAAGAACCATTTGGTTATATAGGAATAGTTTGAGCCATAATGGCCATCGGCCTTCTAGGATTTATCGTATGGGCCCACCACATATTCACTGTTGGAATAGACGTAGACACTCGTGCATACTTCACATCTGCGACAATAATTATTGCAATTCCAACAGGTGTAAAAGTATTCAGCTGACTAGCCACACTTCACGGAGGGTCTATTAAATGAGAAACACCTATGCTATGGGCCCTAGGATTTATTTTCCTGTTCACAGTAGGTGGTTTAACAGGAATCGTCCTATCCAACTCATCACTAGACATTGTCCTTCATGACACCTATTATGTAGTTGCGCATTTCCACTATGTACTATCAATAGGTGCCGTATTCGCCATTATAGCAGCTTTCGTACACTGATTCCCCCTATTAACCGGATATACCCTACACAGCGCCTGAACAAAAATCCACTTTGCGGTTATGTTTATTGGGGTCAACCTCACATTCTTCCCACAACACTTCCTAGGCCTAGCAGGCATGCCACGACGATATTCTGACTACCCAGACGCCTACGCCCTGTGAAATACAGTATCATCTATTGGGTCACTAATCTCTTTAGTAGCAGTAATCATGTTCCTATTTATTCTATGAGAAGCCTTCGCCGCTAAACGGGAAGTACTATCCGTAGAACTAACAATAACAAATGTAGAATGACTTCACGGCTGCCCTCCCCCTTACCACACATACGAAGAACCAGCATTCGTACAAATTCAATCAAATTAA
>gi|1145139817|gb|KY319942.1| Poropuntius lobocheiloides voucher SUC8756 cytochrome c oxidase subunit I (COI) gene, complete cds; mitochondrial
GTGGCAATCACGCGCTGATTCTTCTCTACTAACCACAAAGACATTGGTACCCTTTATCTTGTATTTGGTGCCTGAGCCGGAATAGTAGGAACCGCCTTAAGCCTTCTTATTCGGGCTGAACTTAGCCAACCCGGATCACTTCTAGGTGATGACCAAATTTATAACGTCATCGTTACCGCCCACGCCTTTGTAATAATTTTCTTTATAGTAATGCCTATCCTCATTGGAGGATTTGGGAACTGACTCGTGCCACTAATAATTGGAGCCCCAGACATAGCATTTCCACGAATAAATAACATAAGCTTTTGACTACTGCCCCCATCATTTCTGCTATTATTAGCCTCCTCTGGTGTTGAAGCTGGAGCTGGAACAGGGTGAACAGTATACCCACCTCTTGCAGGAAATCTGGCCCATGCAGGAGCATCAGTAGACCTGACAATTTTCTCGCTCCACTTAGCAGGTGTGTCATCAATTTTAGGTGCAATTAATTTTATTACCACAACTATTAACATGAAACCTCCAGCCATCTCCCAATATCAAACACCACTATTTGTCTGATCCGTGCTTGTAACCGCTGTATTACTCCTCCTATCATTACCTGTTTTAGCTGCCGGAATTACAATACTACTAACAGACCGAAACCTTAATACCACTTTCTTTGACCCAGCAGGTGGAGGGGACCCAATCCTTTACCAACACCTATTCTGATTCTTTGGGCACCCGAAAGTTTATATTCTTATTCTCCCGGGATTCGGAATTATTTCCCACGTCGTAGCCTACTACTCAGGTAAAAAAGAACCATTTGGTTATATAGGAATAGTTTGAGCCATAATGGCCATCGGCCTTCTAGGATTTATCGTATGGGCCCACCACATATTCACTGTTGGAATAGACGTAGACACTCGTGCATACTTCACATCTGCGACAATAATTATTGCAATTCCAACAGGTGTAAAAGTATTCAGCTGACTAGCCACACTTCACGGAGGGTCTATTAAATGAGAAACACCTATGCTATGGGCCCTAGGATTTATTTTCCTGTTCACAGTAGGTGGTTTAACAGGAATCGTCCTATCCAACTCATCACTAGACATTGTCCTTCATGACACCTATTATGTAGTTGCGCATTTCCACTATGTACTATCAATAGGTGCCGTATTCGCCATTATAGCAGCTTTCGTACACTGATTCCCCCTATTAACCGGATACACCCTACACAGCGCCTGAACAAAAATCCACTTTGCGGTTATGTTTATTGGGGTCAACCTCACATTCTTCCCACAACACTTCCTAGGCCTAGCAGGCATGCCACGACGATATTCTGACTATCCAGACGCCTACGCCCTGTGAAATACAGTATCATCTATTGGGTCACTAATCTCTTTAGTAGCAGTAATCATGTTCCTATTTATTCTATGAGAAGCCTTCGCCGCTAAACGGGAAGTACTATCCGTAGAACTAACAATAACAAATGTAGAATGACTTCACGGCTGCCCTCCCCCTTACCACACATACGAAGAACCAGCATTCGTACAAATTCAATCAAATTAA
>gi|1145139819|gb|KY319943.1| Poropuntius lobocheiloides voucher SUC8757 cytochrome c oxidase subunit I (COI) gene, complete cds; mitochondrial
GTGGCAATCACGCGCTGATTCTTCTCTACTAACCACAAAGACATTGGTACCCTTTATCTTGTATTTGGTGCCTGAGCCGGAATAGTAGGAACCGCCTTAAGCCTTCTTATTCGGGCTGAACTTAGCCAACCCGGATCACTTCTAGGTGATGACCAAATTTATAACGTCATCGTTACCGCCCACGCCTTTGTAATAATTTTCTTTATAGTAATGCCTATCCTCATTGGAGGATTTGGGAACTGACTCGTGCCACTAATAATCGGAGCCCCAGACATAGCATTTCCACGAATAAATAACATAAGCTTTTGACTACTGCCCCCATCATTTCTGCTATTATTAGCCTCCTCTGGTGTTGAAGCTGGAGCTGGAACAGGGTGAACAGTATACCCACCTCTTGCAGGAAATCTGGCCCATGCAGGAGCATCAGTAGACCTGACAATTTTCTCGCTCCACTTAGCAGGTGTGTCATCAATTTTAGGTGCAATTAATTTTATTACCACAACTATTAACATGAAACCTCCAGCCATCTCCCAATATCAAACACCACTATTTGTCTGATCCGTGCTTGTAACCGCTGTATTACTCCTCCTATCATTACCTGTTTTAGCTGCCGGAATTACAATACTACTAACAGACCGAAACCTTAATACCACTTTCTTTGACCCAGCAGGTGGAGGGGACCCAATCCTTTACCAACACCTATTCTGATTCTTTGGGCACCCGAAAGTTTATATTCTTATTCTCCCGGGATTCGGAATTATTTCCCACGTCGTAGCCTACTACTCAGGTAAAAAAGAACCATTTGGTTATATAGGAATAGTTTGAGCCATAATGGCCATCGGCCTTCTAGGATTTATCGTATGGGCCCACCACATATTCACTGTTGGAATAGACGTAGACACTCGTGCATACTTCACATCTGCGACAATAATTATTGCAATTCCAACAGGTGTAAAAGTATTCAGCTGACTAGCCACACTTCACGGAGGGTCTATTAAATGAGAAACACCTATGCTATGGGCCCTAGGATTTATTTTCCTGTTCACAGTAGGTGGTTTAACAGGAATCGTCCTATCCAACTCATCACTAGACATTGTCCTTCATGACACCTATTATGTAGTTGCGCATTTCCACTATGTACTATCAATAGGTGCCGTATTCGCCATTATAGCAGCTTTCGTACACTGATTCCCCCTATTAACCGGATATACCCTACACAGCGCCTGAACAAAAATCCACTTTGCGGTTATGTTTATTGGGGTCAACCTCACATTCTTCCCACAACACTTCCTAGGCCTAGCAGGCATGCCACGACGATATTCTGACTACCCAGACGCCTACGCCCTGTGAAATACAGTATCATCTATTGGGTCACTAATCTCTTTAGTAGCAGTAATCATGTTCCTATTTATTCTATGAGAAGCCTTCGCCGCTAAACGGGAAGTACTATCCGTAGAACTAACAATAACAAATGTAGAATGACTTCACGGCTGCCCTCCCCCTTACCACACATACGAAGAACCAGCATTCGTACAAATTCAATCAAACTAA
>gi|1145139821|gb|KY319944.1| Poropuntius lobocheiloides voucher SUC8758 cytochrome c oxidase subunit I (COI) gene, complete cds; mitochondrial
GTGGCAATCACGCGCTGATTCTTCTCTACTAACCACAAAGACATTGGTACCCTTTATCTTGTATTTGGTGCCTGAGCCGGAATAGTAGGAACCGCCTTAAGCCTTCTTATTCGGGCTGAACTTAGCCAACCCGGATCACTTCTAGGTGATGACCAAATTTATAACGTCATCGTTACCGCCCACGCCTTTGTAATAATTTTCTTTATAGTAATGCCTATCCTCATTGGAGGATTTGGGAACTGACTCGTGCCACTAATAATCGGAGCCCCAGACATAGCATTTCCACGAATAAATAACATAAGCTTTTGACTACTGCCCCCATCATTTCTGCTATTATTAGCCTCCTCTGGTGTTGAAGCTGGAGCTGGAACAGGGTGAACAGTATACCCACCTCTTGCAGGAAATCTGGCCCATGCAGGAGCATCAGTAGACCTGACAATTTTCTCGCTCCACTTAGCAGGTGTGTCATCAATTTTAGGTGCAATTAATTTTATTACCACAACTATTAACATGAAACCTCCAGCCATCTCCCAATATCAAACACCACTATTTGTCTGATCCGTGCTTGTAACCGCTGTATTACTCCTCCTATCATTACCTGTTTTAGCTGCCGGAATTACAATACTACTAACAGACCGAAACCTTAATACCACTTTCTTTGACCCAGCAGGTGGAGGGGACCCAATCCTTTACCAACACCTATTCTGATTCTTTGGGCACCCGAAAGTTTATATTCTTATTCTCCCGGGATTCGGAATTATTTCCCACGTCGTAGCCTACTACTCAGGTAAAAAAGAACCATTTGGTTATATAGGAATAGTTTGAGCCATAATGGCCATCGGCCTTCTAGGATTTATCGTATGGGCCCACCACATATTCACTGTTGGAATAGACGTAGACACTCGTGCATACTTCACATCTGCGACAATAATTATTGCAATTCCAACAGGTGTAAAAGTATTCAGCTGACTAGCCACACTTCACGGAGGGTCTATTAAATGAGAAACACCTATGCTATGGGCCCTAGGATTTATTTTCCTGTTCACAGTAGGTGGTTTAACAGGAATCGTCCTATCCAACTCATCACTAGACATTGTCCTTCATGACACCTATTATGTAGTTGCGCATTTCCACTATGTACTATCAATAGGTGCCGTATTCGCCATTATAGCAGCTTTCGTACACTGATTCCCCCTATTAACCGGATATACCCTACACAGCGCCTGAACAAAAATCCACTTTGCGGTTATGTTTATTGGGGTCAACCTCACATTCTTCCCACAACACTTCCTAGGCCTAGCAGGCATGCCACGACGATATTCTGACTATCCAGACGCCTACGCCCTGTGAAATACAGTATCATCTATTGGGTCACTAATCTCTTTAGTAGCAGTAATCATGTTCCTATTTATTCTATGAGAAGCCTTCGCCGCTAAACGGGAAGTACTATCCGTAGAACTAACAATAACAAATGTAGAATGACTTCACGGCTGCCCTCCCCCTTACCACACATACGAAGAACCAGCATTCGTACAAATTCAATCAAATTAA
>gi|1145139823|gb|KY319945.1| Poropuntius lobocheiloides voucher SUC8759 cytochrome c oxidase subunit I (COI) gene, complete cds; mitochondrial
GTGGCAATCACGCGCTGATTCTTCTCTACTAACCACAAAGACATTGGTACCCTTTATCTTGTATTTGGTGCCTGAGCCGGAATAGTAGGAACCGCCTTAAGCCTTCTTATTCGGGCTGAACTTAGCCAACCCGGATCACTTCTAGGTGATGACCAAATTTATAACGTCATCGTTACCGCCCACGCCTTTGTAATAATTTTCTTTATAGTAATGCCTATCCTCATTGGAGGATTTGGGAACTGACTCGTGCCACTAATAATCGGAGCCCCAGACATAGCATTTCCACGAATAAATAACATAAGCTTTTGACTACTGCCCCCATCATTTCTGCTATTATTAGCCTCCTCTGGTGTTGAAGCTGGAGCTGGAACAGGGTGAACAGTATACCCACCTCTTGCAGGAAATCTGGCCCATGCAGGAGCATCAGTAGACCTGACAATTTTCTCGCTCCACTTAGCAGGTGTGTCATCAATTTTAGGTGCAATTAATTTTATTACCACAACTATTAACATGAAACCTCCAGCCATCTCCCAATATCAAACACCACTATTTGTCTGATCCGTGCTTGTAACCGCTGTATTACTCCTCCTATCATTACCTGTTTTAGCTGCCGGAATTACAATACTACTAACAGACCGAAACCTTAATACCACTTTCTTTGACCCAGCAGGTGGAGGGGACCCAATCCTTTACCAACACCTATTCTGATTCTTTGGGCACCCGAAAGTTTATATTCTTATTCTCCCGGGATTCGGAATTATTTCCCACGTCGTAGCCTACTACTCAGGTAAAAAAGAACCATTTGGTTATATAGGAATAGTTTGAGCCATAATGGCCATCGGCCTTCTAGGATTTATCGTATGGGCCCACCACATATTCACTGTTGGAATAGACGTAGACACTCGTGCATACTTCACATCTGCGACAATAATTATTGCAATTCCAACAGGTGTAAAAGTATTCAGCTGACTAGCCACACTTCACGGAGGGTCTATTAAATGAGAAACACCTATGCTATGGGCCCTAGGATTTATTTTCCTGTTCACAGTAGGTGGTTTAACAGGAATCGTCCTATCCAACTCATCACTAGACATTGTCCTTCATGACACCTATTATGTAGTTGCGCATTTCCACTATGTACTATCAATAGGTGCCGTATTCGCCATTATAGCAGCTTTCGTACACTGATTCCCCCTATTAACCGGATATACCCTACACAGCGCCTGAACAAAAATCCACTTTGCGGTTATGTTTATTGGGGTCAACCTCACATTCTTCCCACAACACTTCCTAGGCCTAGCAGGCATGCCACGACGATATTCTGACTATCCAGACGCCTACGCCCTGTGAAATACAGTATCATCTATTGGGTCACTAATCTCTTTAGTAGCAGTAATCATGTTCCTATTTATTCTATGAGAAGCCTTCGCCGCTAAACGGGAAGTACTATCCGTAGAACTAACAATAACAAATGTAGAATGACTTCACGGCTGCCCTCCCCCTTACCACACATACGAAGAACCAGCATTCGTACAAATTCAATCAAATTAA
>gi|1145139825|gb|KY319946.1| Poropuntius lobocheiloides voucher SUC8760 cytochrome c oxidase subunit I (COI) gene, complete cds; mitochondrial
GTGGCAATCACGCGCTGATTCTTCTCTACTAACCACAAAGACATTGGTACCCTTTATCTTGTATTTGGTGCCTGAGCCGGAATAGTAGGAACCGCCTTAAGCCTTCTTATTCGGGCTGAACTTAGCCAACCCGGATCACTTCTAGGTGATGACCAAATTTATAACGTCATCGTTACCGCCCACGCCTTTGTAATAATTTTCTTTATAGTAATGCCTATCCTCATTGGAGGATTTGGGAACTGACTCGTGCCACTAATAATCGGAGCCCCAGACATAGCATTTCCACGAATAAATAACATAAGCTTTTGACTACTGCCCCCATCATTTCTGCTATTATTAGCCTCCTCTGGTGTTGAAGCTGGAGCTGGAACAGGGTGAACAGTATACCCACCTCTTGCAGGAAATCTGGCCCATGCAGGAGCATCAGTAGACCTGACAATTTTCTCGCTCCACTTAGCAGGTGTGTCATCAATTTTAGGTGCAATTAATTTTATTACCACAACTATTAACATGAAACCTCCAGCCATCTCCCAATATCAAACACCACTATTTGTCTGATCCGTGCTTGTAACCGCTGTATTACTCCTCCTATCATTACCTGTTTTAGCTGCCGGAATTACAATACTACTAACAGACCGAAACCTTAATACCACTTTCTTTGACCCAGCAGGTGGAGGGGACCCAATCCTTTACCAACACCTATTCTGATTCTTTGGGCACCCGAAAGTTTATATTCTTATTCTCCCGGGATTCGGAATTATTTCCCACGTCGTAGCCTACTACTCAGGTAAAAAAGAACCATTTGGTTATATAGGAATAGTTTGAGCCATAATGGCCATCGGCCTTCTAGGATTTATCGTATGGGCCCACCACATATTCACTGTTGGAATAGACGTAGACACTCGTGCATACTTCACATCTGCGACAATAATTATTGCAATTCCAACAGGTGTAAAAGTATTCAGCTGACTAGCCACACTTCACGGAGGGTCTATTAAATGAGAAACACCTATGCTATGGGCCCTAGGATTTATTTTCCTGTTCACAGTAGGTGGTTTAACAGGAATCGTCCTATCCAACTCATCACTAGACATTGTCCTTCATGACACCTATTATGTAGTTGCGCATTTCCACTATGTACTATCAATAGGTGCCGTATTCGCCATTATAGCAGCTTTCGTACACTGATTCCCCCTATTAACCGGATATACCCTACACAGCGCCTGAACAAAAATCCACTTTGCGGTTATGTTTATTGGGGTCAACCTCACATTCTTCCCACAACACTTCCTAGGCCTAGCAGGCATGCCACGACGATATTCTGACTATCCAGACGCCTACGCCCTGTGAAATACAGTATCATCTATTGGGTCACTAATCTCTTTAGTAGCAGTAATCATGTTCCTATTTATTCTATGAGAAGCCTTCGCCGCTAAACGGGAAGTACTATCCGTAGAACTAACAATAACAAATGTAGAATGACTTCACGGCTGCCCTCCCCCTTACCACACATACGAAGAACCAGCATTCGTACAAATTCAATCAAATTAA
>gi|1145139827|gb|KY319947.1| Poropuntius lobocheiloides voucher SUC8761 cytochrome c oxidase subunit I (COI) gene, complete cds; mitochondrial
GTGGCAATCACGCGCTGATTCTTCTCTACTAACCACAAAGACATTGGTACCCTTTATCTTGTATTTGGTGCCTGAGCCGGAATAGTAGGAACCGCCTTAAGCCTTCTTATTCGGGCTGAACTTAGCCAACCCGGATCACTTCTAGGTGATGACCAAATTTATAACGTCATCGTTACCGCCCACGCCTTTGTAATAATTTTCTTTATAGTAATGCCTATCCTCATTGGAGGATTTGGGAACTGACTCGTGCCACTAATAATCGGAGCCCCAGACATAGCATTTCCACGAATAAATAACATAAGCTTTTGACTACTGCCCCCATCATTTCTGCTATTATTAGCCTCCTCTGGTGTTGAAGCTGGAGCTGGAACAGGGTGAACAGTATACCCACCTCTTGCAGGAAATCTGGCCCATGCAGGAGCATCAGTAGACCTGACAATTTTCTCGCTCCACTTAGCAGGTGTGTCATCAATTTTAGGTGCAATTAATTTTATTACCACAACTATTAACATGAAACCTCCAGCCATCTCCCAATATCAAACACCACTATTTGTCTGATCCGTGCTTGTAACCGCTGTATTACTCCTCCTATCATTACCTGTTTTAGCTGCCGGAATTACAATACTACTAACAGACCGAAACCTTAATACCACTTTCTTTGACCCAGCAGGTGGAGGGGACCCAATCCTTTACCAACACCTATTCTGATTCTTTGGGCACCCGAAAGTTTATATTCTTATTCTCCCGGGATTCGGAATTATTTCCCACGTCGTAGCCTACTACTCAGGTAAAAAAGAACCATTTGGTTATATAGGAATAGTTTGAGCCATAATGGCCATCGGCCTTCTAGGATTTATCGTATGGGCCCACCACATATTCACTGTTGGAATAGACGTAGACACTCGTGCATACTTCACATCTGCGACAATAATTATTGCAATTCCAACAGGTGTAAAAGTATTCAGCTGACTAGCCACACTTCACGGAGGGTCTATTAAATGAGAAACACCTATGCTATGGGCCCTAGGATTTATTTTCCTGTTCACAGTAGGTGGTTTAACAGGAATCGTCCTATCCAACTCATCACTAGACATTGTCCTTCATGACACCTATTATGTAGTTGCGCATTTCCACTATGTACTATCAATAGGTGCCGTATTCGCCATTATAGCAGCTTTCGTACACTGATTCCCCCTATTAACCGGATATACCCTACACAGCGCCTGAACAAAAATCCACTTTGCGGTTATGTTTATTGGGGTCAACCTCACATTCTTCCCACAACACTTCCTAGGCCTAGCAGGCATGCCACGACGATATTCTGACTATCCAGACGCCTACGCCCTGTGAAATACAGTATCATCTATTGGGTCACTAATCTCTTTAGTAGCAGTAATCATGTTCCTATTTATTCTATGAGAAGCCTTCGCCGCTAAACGGGAAGTACTATCCGTAGAACTAACAATAACAAATGTAGAATGACTTCACGGCTGCCCTCCCCCTTACCACACATACGAAGAACCAGCATTCGTACAAATTCAATCAAATTAA
>gi|1145139829|gb|KY319948.1| Poropuntius lobocheiloides voucher SUC8762 cytochrome c oxidase subunit I (COI) gene, complete cds; mitochondrial
GTGGCAATCACGCGCTGATTCTTCTCTACTAACCACAAAGACATTGGTACCCTTTATCTTGTATTTGGTGCCTGAGCCGGAATAGTAGGAACCGCCTTAAGCCTTCTTATTCGGGCTGAACTTAGCCAACCCGGATCACTTCTAGGTGATGACCAAATTTATAACGTCATCGTTACCGCCCACGCCTTTGTAATAATTTTCTTTATAGTAATGCCTATCCTCATTGGAGGATTTGGGAACTGACTCGTGCCACTAATAATCGGAGCCCCAGACATAGCATTTCCACGAATAAATAACATAAGCTTTTGACTACTGCCCCCATCATTTCTGCTATTATTAGCCTCCTCTGGTGTTGAAGCTGGAGCTGGAACAGGGTGAACAGTATACCCACCTCTTGCAGGAAATCTGGCCCATGCAGGAGCATCAGTAGACCTGACAATTTTCTCGCTCCACTTAGCAGGTGTGTCATCAATTTTAGGTGCAATTAATTTTATTACCACAACTATTAACATGAAACCTCCAGCCATCTCCCAATATCAAACACCACTATTTGTCTGATCCGTGCTTGTAACCGCTGTATTACTCCTCCTATCATTACCTGTTTTAGCTGCCGGAATTACAATACTACTAACAGACCGAAACCTTAATACCACTTTCTTTGACCCAGCAGGTGGAGGGGACCCAATCCTTTACCAACACCTATTCTGATTCTTTGGGCACCCGAAAGTTTATATTCTTATTCTCCCGGGATTCGGAATTATTTCCCACGTCGTAGCCTACTACTCAGGTAAAAAAGAACCATTTGGTTATATAGGAATAGTTTGAGCCATAATGGCCATCGGCCTTCTAGGATTTATCGTATGGGCCCACCACATATTCACTGTTGGAATAGACGTAGACACTCGTGCATACTTCACATCTGCGACAATAATTATTGCAATTCCAACAGGTGTAAAAGTATTCAGCTGACTAGCCACACTTCACGGAGGGTCTATTAAATGAGAAACACCTATGCTATGGGCCCTAGGATTTATTTTCCTGTTCACAGTAGGTGGTTTAACAGGAATCGTCCTATCCAACTCATCACTAGACATTGTCCTTCATGACACCTATTATGTAGTTGCGCATTTCCACTATGTACTATCAATAGGTGCCGTATTCGCCATTATAGCAGCTTTCGTACACTGATTCCCCCTATTAACCGGATATACCCTACACAGCGCCTGAACAAAAATCCACTTTGCGGTTATGTTTATTGGGGTCAACCTCACATTCTTCCCACAACACTTCCTAGGCCTAGCAGGCATGCCACGACGATATTCTGACTACCCAGACGCCTACGCCCTGTGAAATACAGTATCATCTATTGGGTCACTAATCTCTTTAGTAGCAGTAATCATGTTCCTATTTATTCTATGAGAAGCCTTCGCCGCTAAACGGGAAGTACTATCCGTAGAACTAACAATAACAAATGTAGAATGACTTCACGGCTGCCCTCCCCCTTACCACACATACGAAGAACCAGCATTCGTACAAATTCAATCAAATTAA
>gi|1145139831|gb|KY319949.1| Poropuntius lobocheiloides voucher SUC8763 cytochrome c oxidase subunit I (COI) gene, complete cds; mitochondrial
GTGGCAATCACGCGCTGATTCTTCTCTACTAACCACAAAGACATTGGTACCCTTTATCTTGTATTTGGTGCCTGAGCCGGAATAGTAGGAACCGCCTTAAGCCTTCTTATTCGGGCTGAACTTAGCCAACCCGGATCACTTCTAGGTGATGACCAAATTTATAACGTCATCGTTACCGCCCACGCCTTTGTAATAATTTTCTTTATAGTAATGCCTATCCTCATTGGAGGATTTGGGAACTGACTCGTGCCACTAATAATCGGAGCCCCAGACATAGCATTTCCACGAATAAATAACATAAGCTTTTGACTACTGCCCCCATCATTTCTGCTATTATTAGCCTCCTCTGGTGTTGAAGCTGGAGCTGGGACAGGGTGAACAGTATACCCACCTCTTGCAGGAAATCTGGCCCATGCAGGAGCATCAGTAGACCTGACAATTTTCTCGCTCCACTTAGCAGGTGTGTCATCAATTTTAGGTGCAATTAATTTTATTACCACAACTATTAACATGAAACCTCCAGCCATCTCCCAATATCAAACACCACTATTTGTCTGATCCGTGCTTGTAACCGCTGTATTACTCCTCCTATCATTACCTGTTTTAGCTGCCGGAATTACAATACTACTAACAGACCGAAACCTTAATACCACTTTCTTTGACCCAGCAGGTGGAGGGGACCCAATCCTTTACCAACACCTATTCTGATTCTTTGGGCACCCGAAAGTTTATATTCTTATTCTCCCGGGATTCGGAATTATTTCCCACGTCGTAGCCTACTACTCAGGTAAAAAAGAACCATTTGGTTATATAGGAATAGTTTGAGCCATAATGGCCATCGGCCTTCTAGGATTTATCGTATGGGCCCACCACATATTCACTGTTGGAATAGACGTAGACACTCGTGCATACTTCACATCTGCGACAATAATTATTGCAATTCCAACAGGTGTAAAAGTATTCAGCTGACTAGCCACACTTCACGGAGGGTCTATTAAATGAGAAACACCTATGCTATGGGCCCTAGGATTTATTTTCCTGTTCACAGTAGGTGGTTTAACAGGAATCGTCCTATCCAACTCATCACTAGACATTGTCCTTCATGACACCTATTATGTAGTTGCGCATTTCCACTATGTACTATCAATAGGTGCCGTATTCGCCATTATAGCAGCTTTCGTACACTGATTCCCCCTATTAACCGGATATACCCTACACAGCGCCTGAACAAAAATCCACTTTGCGGTTATGTTTATTGGGGTCAACCTCACATTCTTCCCACAACACTTCCTAGGCCTAGCAGGCATGCCACGACGATATTCTGACTATCCAGACGCCTACGCCCTGTGAAATACAGTATCATCTATTGGGTCACTAATCTCTTTAGTAGCAGTAATCATGTTCCTATTTATTCTATGAGAAGCCTTCGCCGCTAAACGGGAAGTACTATCCGTAGAACTAACAATAACAAATGTAGAATGACTTCACGGCTGCCCTCCCCCTTACCACACATACGAAGAACCAGCATTCGTACAAATTCAATCAAATTAA
>gi|1145139833|gb|KY319950.1| Poropuntius solitus voucher SUC0317.24 cytochrome c oxidase subunit I (COI) gene, complete cds; mitochondrial
GTGGCAATCACGCGCTGATTCTTCTCTACTAACCACAAAGACATTGGTACCCTTTATCTTGTATTTGGTGCCTGAGCCGGAATAGTAGGAACCGCCTTAAGCCTTCTTATTCGGGCTGAACTTAGCCAACCCGGATCACTTCTAGGTGATGACCAAATTTATAACGTCATCGTTACCGCCCACGCCTTTGTAATAATTTTCTTTATAGTAATGCCTATCCTCATTGGAGGATTTGGGAACTGACTCGTGCCACTAATAATCGGAGCCCCAGACATAGCATTTCCACGAATAAATAACATAAGCTTTTGACTACTGCCCCCATCATTTCTGCTATTATTAGCCTCCTCTGGTGTTGAAGCTGGAGCTGGAACAGGGTGAACAGTATACCCACCTCTTGCAGGAAATCTGGCCCATGCAGGAGCATCAGTAGACCTGACAATTTTCTCGCTCCACTTAGCAGGTGTGTCATCAATTTTAGGTGCAATTAATTTTATTACCACAACTATTAACATGAAACCTCCAGCCATCTCCCAATATCAAACACCACTATTTGTCTGATCCGTGCTTGTAACCGCTGTATTACTCCTCCTATCATTACCTGTTTTAGCTGCCGGAATTACAATACTACTAACAGACCGAAACCTTAATACCACTTTCTTTGACCCAGCAGGTGGAGGAGACCCAATCCTTTACCAACACCTATTCTGATTCTTTGGGCACCCGGAAGTCTATATTCTTATTCTCCCGGGATTCGGAATTATTTCCCACGTCGTAGCCTACTACTCAGGTAAAAAAGAACCATTTGGTTATATAGGAATAGTTTGAGCCATAATGGCCATCGGCCTTCTAGGATTTATCGTATGGGCCCACCACATATTCACTGTTGGAATAGACGTAGACACTCGTGCATACTTCACATCTGCGACAATAATTATTGCAATTCCAACAGGTGTAAAAGTATTCAGCTGACTAGCCACACTTCACGGAGGGTCTATTAAATGAGAAACACCTATGCTATGGGCCCTAGGATTTATTTTCCTGTTCACAGTAGGTGGTTTAACAGGAATCGTCCTATCCAACTCATCACTAGACATTGTCCTTCATGACACCTATTATGTAGTTGCGCATTTCCACTATGTACTATCAATAGGTGCCGTATTCGCCATTATAGCAGCTTTCGTACACTGATTCCCCCTATTAACCGGATACACCCTACACAACGCCTGAACAAAAATCCACTTTGCGGTTATGTTTATTGGGGTCAACCTCACATTCTTCCCACAACACTTCCTAGGCCTAGCAGGCATGCCACGACGATATTCTGACTATCCAGACGCCTACGCCCTGTGAAATACAGTATCATCTATTGGGTCACTAATCTCTTTAGTAGCAGTAATCATGTTCCTATTTATTCTATGAGAAGCCTTCGCCGCTAAACGGGAAGTACTATCCGTAGAACTAACAATAACAAATGTAGAATGACTTCACGGCTGCCCTCCCCCTTACCACACATACGAAGAACCAGCATTCGTACAAATTCAATCAAATTAA
>gi|1145139835|gb|KY319951.1| Poropuntius solitus voucher SUC0317.25 cytochrome c oxidase subunit I (COI) gene, complete cds; mitochondrial
GTGGCAATCACGCGCTGATTCTTCTCTACTAACCACAAAGACATTGGTACCCTTTATCTTGTATTTGGTGCCTGAGCCGGAATAGTAGGAACCGCCTTAAGCCTTCTTATTCGGGCTGAACTTAGCCAACCCGGATCACTTCTAGGTGATGACCAAATTTATAACGTCATCGTTACCGCCCACGCCTTTGTAATAATTTTCTTTATAGTAATGCCTATCCTCATTGGAGGATTTGGGAACTGACTCGTGCCACTAATAATCGGAGCCCCAGACATAGCATTTCCACGAATAAATAACATAAGCTTTTGACTACTGCCCCCATCATTTCTGCTATTATTAGCCTCCTCTGGTGTTGAAGCTGGAGCTGGAACAGGGTGAACAGTATACCCACCTCTTGCAGGAAATCTGGCCCATGCAGGAGCATCAGTAGACCTGACAATTTTCTCGCTCCACTTAGCAGGTGTATCATCAATTTTAGGTGCAATTAATTTTATTACCACAACTATTAACATGAAACCTCCAGCCATCTCCCAATATCAAACACCACTATTTGTCTGATCCGTGCTTGTAACCGCTGTATTACTCCTCCTATCATTACCTGTTTTAGCTGCCGGAATTACAATACTACTAACAGACCGAAACCTTAATACCACTTTCTTTGACCCAGCAGGTGGAGGAGACCCAATCCTTTACCAACACCTATTCTGATTCTTTGGGCACCCGGAAGTCTATATTCTTATTCTCCCGGGATTCGGAATTATTTCCCACGTCGTAGCCTACTACTCAGGTAAAAAAGAACCATTTGGTTATATAGGAATAGTTTGAGCCATAATGGCCATCGGCCTTCTAGGATTTATCGTATGGGCCCACCACATATTCACTGTTGGAATAGACGTAGACACTCGTGCATACTTCACATCTGCGACAATAATTATTGCAATTCCAACAGGTGTAAAAGTATTCAGCTGACTAGCCACACTTCACGGAGGGTCTATTAAATGAGAAACACCTATGCTATGGGCCCTAGGATTTATTTTCCTGTTCACAGTAGGTGGTTTAACAGGAATCGTCCTATCCAACTCATCACTAGACATTGTCCTTCATGACACCTATTATGTAGTTGCGCATTTCCACTATGTACTATCAATAGGTGCCGTATTCGCCATTATAGCAGCTTTCGTACACTGATTCCCCCTATTAACCGGATACACCCTACACAGCGCCTGAACAAAAATCCACTTTGCGGTTATGTTTATTGGGGTCAACCTCACATTCTTCCCACAACACTTCCTAGGCCTAGCAGGCATGCCACGGCGATATTCTGACTATCCAGACGCCTACGCCCTGTGAAATACAGTATCATCTATTGGGTCACTAATCTCTTTAGTAGCAGTAATCATGTTCCTATTTATTCTATGAGAAGCCTTCGCCGCTAAACGGGAAGTACTATCCGTAGAACTAACAATAACAAATGTAGAATGACTTCACGGCTGCCCTCCCCCTTACCACACATACGAAGAACCAGCATTCGTACAAATTCAATCAAATTAA
>gi|1145139837|gb|KY319952.1| Poropuntius solitus voucher SUC0317.26 cytochrome c oxidase subunit I (COI) gene, complete cds; mitochondrial
GTGGCAATCACGCGCTGATTCTTCTCTACTAACCACAAAGACATTGGTACCCTTTATCTTGTATTTGGTGCCTGAGCCGGAATAGTAGGAACCGCCTTAAGCCTTCTTATTCGGGCTGAACTTAGCCAACCCGGATCACTTCTAGGTGATGACCAAATTTATAACGTCATCGTTACCGCCCACGCCTTTGTAATAATTTTCTTTATAGTAATGCCTATCCTCATTGGAGGATTTGGGAACTGACTCGTGCCACTAATAATCGGAGCCCCAGACATAGCATTTCCACGAATAAATAACATAAGCTTTTGACTACTGCCCCCATCATTTCTGCTATTATTAGCCTCCTCTGGTGTTGAAGCTGGAGCTGGAACAGGGTGAACAGTATACCCACCTCTTGCAGGAAATCTGGCCCATGCAGGAGCATCAGTAGACCTGACAATTTTCTCGCTCCACTTAGCAGGTGTGTCATCAATTTTAGGTGCAATTAATTTTATTACCACAACTATTAACATGAAACCTCCAGCCATCTCCCAATATCAAACACCACTATTTGTCTGATCCGTGCTTGTAACCGCTGTATTACTCCTCCTATCATTACCTGTTTTAGCTGCCGGAATTACAATACTACTAACAGACCGAAACCTTAATACCACTTTCTTTGACCCAGCAGGTGGAGGAGACCCAATCCTTTACCAACACCTATTCTGATTCTTTGGGCACCCGGAAGTCTATATTCTTATTCTCCCGGGATTCGGAATTATTTCCCACGTCGTAGCCTACTACTCAGGTAAAAAAGAACCATTTGGTTATATAGGAATAGTTTGAGCCATAATGGCCATCGGCCTTCTAGGATTTATCGTATGGGCCCACCACATATTCACTGTTGGAATAGACGTAGACACTCGTGCATACTTCACATCTGCGACAATAATTATTGCAATTCCAACAGGTGTAAAAGTATTCAGCTGACTAGCCACACTTCACGGAGGGTCTATTAAATGAGAAACACCTATGCTATGGGCCCTAGGATTTATTTTCCTGTTCACAGTAGGTGGTTTAACAGGAATCGTCCTATCCAACTCATCACTAGACATTGTCCTTCATGACACCTATTATGTAGTTGCGCATTTCCACTATGTACTATCAATAGGTGCCGTATTCGCCATTATAGCAGCTTTCGTACACTGATTCCCCCTATTAACCGGATACACCCTACACAACGCCTGAACAAAAATCCACTTTGCGGTTATGTTTATTGGGGTCAACCTCACATTCTTCCCACAACACTTCCTAGGCCTAGCAGGCATGCCACGACGATATTCTGACTATCCAGACGCCTACGCCCTGTGAAATACAGTATCATCTATTGGGTCACTAATCTCTTTAGTAGCAGTAATCATGTTCCTATTTATTCTATGAGAAGCCTTCGCCGCTAAACGGGAAGTACTATCCGTAGAACTAACAATAACAAATGTAGAATGACTTCACGGCTGCCCTCCCCCTTACCACACATACGAAGAACCAGCATTCGTACAAATTCAATCAAATTAA
>gi|1145139839|gb|KY319953.1| Poropuntius solitus voucher SUC0317.27 cytochrome c oxidase subunit I (COI) gene, complete cds; mitochondrial
GTGGCAATCACGCGCTGATTCTTCTCTACTAACCACAAAGACATTGGTACCCTTTATCTTGTATTTGGTGCCTGAGCCGGAATAGTAGGAACCGCCTTAAGCCTTCTTATTCGGGCTGAACTTAGCCAACCCGGATCACTTCTAGGTGATGACCAAATTTATAACGTCATCGTTACCGCCCACGCCTTTGTAATAATTTTCTTTATAGTAATGCCTATCCTCATTGGAGGATTTGGGAACTGACTCGTGCCACTAATAATCGGAGCCCCAGACATAGCATTTCCACGAATAAATAACATAAGCTTTTGACTACTGCCCCCATCATTTCTGCTATTATTAGCCTCCTCTGGTGTTGAAGCTGGAGCTGGAACAGGGTGAACAGTATACCCACCTCTTGCAGGAAATCTGGCCCATGCAGGAGCATCAGTAGACCTGACAATTTTCTCGCTCCACTTAGCAGGTGTATCATCAATTTTAGGTGCAATTAATTTTATTACCACAACTATTAACATGAAACCTCCAGCCATCTCCCAATATCAAACACCACTATTTGTCTGATCCGTGCTTGTAACCGCTGTATTACTCCTCCTATCATTACCTGTTTTAGCTGCCGGAATTACAATACTACTAACAGACCGAAACCTTAATACCACTTTCTTTGACCCAGCAGGTGGAGGAGACCCAATCCTTTACCAACACCTATTCTGATTCTTTGGGCACCCGGAAGTCTATATTCTTATTCTCCCGGGATTCGGAATTATTTCCCACGTCGTAGCCTACTACTCAGGTAAAAAAGAACCATTTGGTTATATAGGAATAGTTTGAGCCATAATGGCCATCGGCCTTCTAGGATTTATCGTATGGGCCCACCACATATTCACTGTTGGAATAGACGTAGACACTCGTGCATACTTCACATCTGCGACAATAATTATTGCAATTCCAACAGGTGTAAAAGTATTCAGCTGACTAGCCACACTTCACGGAGGGTCTATTAAATGAGAAACACCTATGCTATGGGCCCTAGGATTTATTTTCCTGTTCACAGTAGGTGGTTTAACAGGAATCGTCCTATCCAACTCATCACTAGACATTGTCCTTCATGACACCTATTATGTAGTTGCGCATTTCCACTATGTACTATCAATAGGTGCCGTATTCGCCATTATAGCAGCTTTCGTACACTGATTCCCCCTATTAACCGGATACACCCTACACAGCGCCTGAACAAAAATCCACTTTGCGGTTATGTTTATTGGGGTCAACCTCACATTCTTCCCACAACACTTCCTAGGCCTAGCAGGCATGCCACGGCGATATTCTGACTATCCAGACGCCTACGCCCTGTGAAATACAGTATCATCTATTGGGTCACTAATCTCTTTAGTAGCAGTAATCATGTTCCTATTTATTCTATGAGAAGCCTTCGCCGCTAAACGGGAAGTACTATCCGTAGAACTAACAATAACAAATGTAGAATGACTTCACGGCTGCCCTCCCCCTTACCACACATACGAAGAACCAGCATTCGTACAAATTCAATCAAATTAA
>gi|1145139841|gb|KY319954.1| Poropuntius solitus voucher SUC0317.28 cytochrome c oxidase subunit I (COI) gene, complete cds; mitochondrial
GTGGCAATCACGCGCTGATTCTTCTCTACTAACCACAAAGACATTGGTACCCTTTATCTTGTATTTGGTGCCTGAGCCGGAATAGTAGGAACCGCCTTAAGCCTTCTTATTCGGGCTGAACTTAGCCAACCCGGATCACTTCTAGGTGATGACCAAATTTATAACGTCATCGTTACCGCCCACGCCTTTGTAATAATTTTCTTTATAGTAATGCCTATCCTCATTGGAGGATTTGGGAACTGACTCGTGCCACTAATAATCGGAGCCCCAGACATAGCATTTCCACGAATAAATAACATAAGCTTTTGACTACTGCCCCCATCATTTCTGCTATTATTAGCCTCCTCTGGTGTTGAAGCTGGAGCTGGAACAGGGTGAACAGTATACCCACCTCTTGCAGGAAATCTGGCCCATGCAGGAGCATCAGTAGACCTGACAATTTTCTCGCTCCACTTAGCAGGTGTGTCATCAATTTTAGGTGCAATTAATTTTATTACCACAACTATTAACATGAAACCTCCAGCCATCTCCCAATATCAAACACCACTATTTGTCTGATCCGTGCTTGTAACCGCTGTATTACTCCTCCTATCATTACCTGTTTTAGCTGCCGGAATTACAATACTACTAACAGACCGAAACCTTAATACTACTTTCTTTGACCCAGCAGGTGGAGGAGACCCGATCCTTTACCAACACCTATTCTGATTCTTTGGGCACCCGGAAGTCTATATTCTTATTCTCCCGGGATTCGGAATTATTTCCCACGTCGTAGCCTACTACTCAGGTAAAAAAGAACCATTTGGTTATATAGGAATAGTTTGAGCCATAATGGCCATCGGCCTTCTAGGATTTATCGTATGGGCCCACCACATATTCACTGTTGGAATAGACGTAGACACTCGTGCATACTTCACATCTGCGACAATAATTATTGCAATTCCAACAGGTGTAAAAGTATTCAGCTGACTAGCCACACTTCACGGAGGGTCTATTAAATGAGAAACACCTATGCTATGGGCCCTAGGATTTATTTTCCTGTTCACAGTAGGTGGTTTAACAGGAATCGTCCTATCCAACTCATCACTAGACATTGTCCTTCATGACACCTATTATGTAGTTGCGCATTTCCACTATGTACTATCAATAGGTGCCGTATTCGCCATTATAGCAGCTTTCGTACACTGATTCCCCCTATTAACCGGATATACCCTACACAGCGCCTGAACAAAAATCCACTTTGCGGTTATGTTTATTGGGGTCAACCTCACATTCTTCCCACAACACTTCCTAGGCCTAGCAGGCATGCCACGACGATATTCTGACTACCCAGACGCCTACGCCCTGTGAAATACAGTATCATCTATTGGGTCACTAATCTCTTTAGTAGCAGTAATCATGTTCCTATTTATTCTATGAGAAGCCTTCGCCGCTAAACGGGAAGTACTATCCGTAGAACTAACAATAACAAATGTAGAATGACTTCACGGCTGCCCTCCCCCTTACCACACATACGAAGAACCAGCATTCGTACAAATTCAATCAAATTAA
>gi|1145139843|gb|KY319955.1| Poropuntius solitus voucher SUC0317.29 cytochrome c oxidase subunit I (COI) gene, complete cds; mitochondrial
GTGGCAATCACGCGCTGATTCTTCTCTACTAACCACAAAGACATTGGTACCCTTTATCTTGTATTTGGTGCCTGAGCCGGAATAGTAGGAACCGCCTTAAGCCTTCTTATTCGGGCTGAACTTAGCCAACCCGGATCACTTCTAGGTGATGACCAAATTTATAACGTCATCGTTACCGCCCACGCCTTTGTAATAATTTTCTTTATAGTAATGCCTATCCTCATTGGAGGATTTGGGAACTGACTCGTGCCACTAATAATCGGAGCCCCAGACATAGCATTTCCACGAATAAATAACATAAGCTTTTGACTACTGCCCCCATCATTTCTGCTATTATTAGCCTCCTCTGGTGTTGAAGCTGGAGCTGGAACAGGGTGAACAGTATACCCACCTCTTGCAGGAAATCTGGCCCATGCAGGAGCATCAGTAGACCTGACAATTTTCTCGCTCCACTTAGCAGGTGTGTCATCAATTTTAGGTGCAATTAATTTTATTACCACAACTATTAACATGAAACCTCCAGCCATCTCCCAATATCAAACACCACTATTTGTCTGATCCGTGCTTGTAACCGCTGTATTACTCCTCCTATCATTACCTGTTTTAGCTGCCGGAATTACAATACTACTAACAGACCGAAACCTTAATACCACTTTCTTTGACCCAGCAGGTGGAGGAGACCCAATCCTTTACCAACACCTATTCTGATTCTTTGGGCACCCGGAAGTCTATATTCTTATTCTCCCGGGATTCGGAATTATTTCCCACGTCGTAGCCTACTACTCAGGTAAAAAAGAACCATTTGGTTATATAGGAATAGTTTGAGCCATAATGGCCATCGGCCTTCTAGGATTTATCGTATGGGCCCACCACATATTCACTGTTGGAATAGACGTAGACACTCGTGCATACTTCACATCTGCGACAATAATTATTGCAATTCCAACAGGTGTAAAAGTATTCAGCTGACTAGCCACACTTCACGGAGGGTCTATTAAATGAGAAACACCTATGCTATGGGCCCTAGGATTTATTTTCCTGTTCACAGTAGGTGGTTTAACAGGAATCGTCCTATCCAACTCATCACTAGACATTGTCCTTCATGACACCTATTATGTAGTTGCGCATTTCCACTATGTACTATCAATAGGTGCCGTATTCGCCATTATAGCAGCTTTCGTACACTGATTCCCCCTATTAACCGGATACACCCTACACAGCGCCTGAACAAAAATCCACTTTGCGGTTATGTTTATTGGGGTCAACCTCACATTCTTCCCACAACACTTCCTAGGCCTAGCAGGCATGCCACGACGATATTCTGACTATCCAGACGCCTACGCCCTGTGAAATACAGTATCATCTATTGGGTCACTAATCTCTTTAGTAGCAGTAATCATGTTCCTATTTATTCTATGAGAAGCCTTCGCCGCTAAACGAGAAGTACTATCCGTAGAACTAACAATAACAAATGTAGAATGACTTCACGGCTGCCCTCCCCCTTACCACACATACGAAGAACCAGCATTCGTACAAATTCAATCAAATTAA
>gi|1145139845|gb|KY319956.1| Poropuntius solitus voucher SUC0317.30 cytochrome c oxidase subunit I (COI) gene, complete cds; mitochondrial
GTGGCAATCACGCGCTGATTCTTCTCTACTAACCACAAAGACATTGGTACCCTTTATCTTGTATTTGGTGCCTGAGCCGGAATAGTAGGAACCGCCTTAAGCCTTCTTATTCGGGCTGAACTTAGCCAACCCGGATCACTTCTAGGTGATGACCAAATTTATAACGTCATCGTTACCGCCCACGCCTTTGTAATAATTTTCTTTATAGTAATGCCTATCCTCATTGGAGGATTTGGGAACTGACTCGTGCCACTAATAATCGGAGCCCCAGACATAGCATTTCCACGAATAAATAACATAAGCTTTTGACTACTGCCCCCATCATTTCTGCTATTATTAGCCTCCTCTGGTGTTGAAGCTGGAGCTGGAACAGGGTGAACAGTATACCCACCTCTTGCAGGAAATCTGGCCCATGCAGGAGCATCAGTAGACCTGACAATTTTCTCGCTCCACTTAGCAGGTGTGTCATCAATTTTAGGTGCAATTAATTTTATTACCACAACTATTAACATGAAACCTCCAGCCATCTCCCAATATCAAACACCACTATTTGTCTGATCCGTGCTTGTAACCGCTGTATTACTCCTCCTATCATTACCTGTTTTAGCTGCCGGAATTACAATACTACTAACAGACCGAAACCTTAATACCACTTTCTTTGACCCAGCAGGTGGAGGAGACCCAATCCTTTACCAACACCTATTCTGATTCTTTGGGCACCCGGAAGTCTATATTCTTATTCTCCCGGGATTCGGAATTATTTCCCACGTCGTAGCCTACTACTCAGGTAAAAAAGAACCATTTGGTTATATAGGAATAGTTTGAGCCATAATGGCCATCGGCCTTCTAGGATTTATCGTATGGGCCCACCACATATTCACTGTTGGAATAGACGTAGACACTCGTGCATACTTCACATCTGCGACAATAATTATTGCAATTCCAACAGGTGTAAAAGTATTCAGCTGACTAGCCACACTTCACGGAGGGTCTATTAAATGAGAAACACCTATGCTATGGGCCCTAGGATTTATTTTCCTGTTCACAGTAGGTGGTTTAACAGGAATCGTCCTATCCAACTCATCACTAGACATTGTCCTTCATGACACCTATTATGTAGTTGCGCATTTCCACTATGTACTATCAATAGGTGCCGTATTCGCCATTATAGCAGCTTTCGTACACTGATTCCCCCTATTAACCGGATATACCCTACACAGCGCCTGAACAAAAATCCACTTTGCGGTTATGTTTATTGGGGTCAACCTCACATTCTTCCCACAACACTTCCTAGGCCTAGCAGGCATGCCACGACGATATTCTGACTACCCAGACGCCTACGCCCTGTGAAATACAGTATCATCTATTGGGTCACTAATCTCTTTAGTAGCAGTAATCATGTTCCTATTTATTCTATGAGAAGCCTTCGCCGCTAAACGGGAAGTACTATCCGTAGAACTAACAATAACAAATGTAGAATGACTTCACGGCTGCCCTCCCCCTTACCACACATACGAAGAACCAGCATTCGTACAAATTCAATCAAATTAA
>gi|1145139847|gb|KY319957.1| Poropuntius solitus voucher SUC0317.31 cytochrome c oxidase subunit I (COI) gene, complete cds; mitochondrial
GTGGCAATCACGCGCTGATTCTTCTCTACTAACCACAAAGACATTGGTACCCTTTATCTTGTATTTGGTGCCTGAGCCGGAATAGTAGGAACCGCCTTAAGCCTTCTTATTCGGGCTGAACTTAGCCAACCCGGATCACTTCTAGGTGATGACCAAATTTATAACGTCATCGTTACCGCCCACGCCTTTGTAATAATTTTCTTTATAGTAATGCCTATCCTCATTGGAGGATTTGGGAACTGACTCGTGCCACTAATAATCGGAGCCCCAGACATAGCATTTCCACGAATAAATAACATAAGCTTTTGACTACTGCCCCCATCATTTCTGCTATTATTAGCCTCCTCTGGTGTTGAAGCTGGAGCTGGAACAGGGTGAACAGTATACCCACCTCTTGCAGGAAATCTGGCCCATGCAGGAGCATCAGTAGACCTGACAATTTTCTCGCTCCACTTAGCAGGTGTGTCATCAATTTTAGGTGCAATTAATTTTATTACCACAACTATTAACATGAAACCTCCAGCCATCTCCCAATATCAAACACCACTATTTGTCTGATCCGTGCTTGTAACCGCTGTATTACTCCTCCTATCATTACCTGTTTTAGCTGCCGGAATTACAATACTACTAACAGACCGAAACCTTAATACCACTTTCTTTGACCCAGCAGGTGGAGGAGACCCAATCCTTTACCAACACCTATTCTGATTCTTTGGGCACCCGGAAGTCTATATTCTTATTCTCCCGGGATTCGGAATTATTTCCCACGTCGTAGCCTACTACTCAGGTAAAAAAGAACCATTTGGTTATATAGGAATAGTTTGAGCCATAATGGCCATCGGCCTTCTAGGATTTATCGTATGGGCCCACCACATATTCACTGTTGGAATAGACGTAGACACTCGTGCATACTTCACATCTGCGACAATAATTATTGCAATTCCAACAGGTGTAAAAGTATTCAGCTGACTAGCCACACTTCACGGAGGGTCTATTAAATGAGAAACACCTATGCTATGGGCCCTAGGATTTATTTTCCTGTTCACAGTAGGTGGTTTAACAGGAATCGTCCTATCCAACTCATCACTAGACATTGTCCTTCATGACACCTATTATGTAGTTGCGCATTTCCACTATGTACTATCAATAGGTGCCGTATTCGCCATTATAGCAGCTTTCGTACACTGATTCCCCCTATTAACCGGATACACCCTACACAGCGCCTGAACAAAAATCCACTTTGCGGTTATGTTTATTGGGGTCAACCTCACATTCTTCCCACAACACTTCCTAGGCCTAGCAGGCATGCCACGACGATATTCTGACTATCCAGACGCCTACGCCCTGTGAAATACAGTATCATCTATTGGGTCACTAATCTCTTTAGTAGCAGTAATCATGTTCCTATTTATTCTATGAGAAGCCTTCGCCGCTAAACGAGAAGTACTATCCGTAGAACTAACAATAACAAATGTAGAATGACTTCACGGCTGCCCTCCCCCTTACCACACATACGAAGAACCAGCATTCGTACAAATTCAATCAAATTAA
>gi|1145139849|gb|KY319958.1| Poropuntius solitus voucher SUC0319.16 cytochrome c oxidase subunit I (COI) gene, complete cds; mitochondrial
GTGGCAATCACGCGCTGATTCTTCTCTACTAACCACAAAGACATTGGTACCCTTTATCTTGTATTTGGTGCCTGAGCCGGAATAGTAGGAACCGCCTTAAGCCTTCTTATTCGGGCTGAACTTAGCCAACCCGGATCACTTCTAGGTGATGACCAAATTTATAACGTCATCGTTACCGCCCACGCCTTTGTAATAATTTTCTTTATAGTAATGCCTATCCTCATTGGAGGATTTGGGAACTGACTCGTGCCACTAATAATCGGAGCCCCAGACATAGCATTTCCACGAATAAATAACATAAGCTTTTGACTACTGCCCCCATCATTTCTGCTATTATTAGCCTCCTCTGGTGTTGAAGCTGGAGCTGGAACAGGGTGAACAGTATACCCACCTCTTGCAGGAAATCTGGCCCATGCAGGAGCATCAGTAGACCTGACAATTTTCTCGCTCCACTTAGCAGGTGTGTCATCAATTTTAGGTGCAATTAATTTTATTACCACAACTATTAACATGAAACCTCCAGCCATCTCCCAATATCAAACACCACTATTTGTCTGATCCGTGCTTGTAACCGCTGTATTACTCCTCCTATCATTACCTGTTTTAGCTGCCGGAATTACAATACTACTAACAGACCGAAACCTTAATACCACTTTCTTTGACCCAGCAGGTGGAGGAGACCCAATCCTTTACCAACACCTATTCTGATTCTTTGGGCACCCGGAAGTCTATATTCTTATTCTCCCGGGATTCGGAATTATTTCCCACGTCGTAGCCTACTACTCAGGTAAAAAAGAACCATTTGGTTATATAGGAATAGTTTGAGCCATAATGGCCATCGGCCTTCTAGGATTTATCGTATGGGCCCACCACATATTCACTGTTGGAATAGACGTAGACACTCGTGCATACTTCACATCTGCGACAATAATTATTGCAATTCCAACAGGTGTAAAAGTATTCAGCTGACTAGCCACACTTCACGGAGGGTCTATTAAATGAGAAACACCTATGCTATGGGCCCTAGGATTTATTTTCCTGTTCACAGTAGGTGGTTTAACAGGAATCGTCCTATCCAACTCATCACTAGACATTGTCCTTCATGACACCTATTATGTAGTTGCGCATTTCCACTATGTACTATCAATAGGTGCCGTATTCGCCATTATAGCAGCTTTCGTACACTGATTCCCCCTATTAACCGGATACACCCTACACAGCGCCTGAACAAAAATCCACTTTGCGGTTATGTTTATTGGGGTCAACCTCACATTCTTCCCACAACACTTCCTAGGCCTAGCAGGCATGCCACGACGATATTCTGACTATCCAGACGCCTACGCCCTGTGAAATACAGTATCATCTATTGGGTCACTAATCTCTTTAGTAGCAGTAATCATGTTCCTATTTATTCTATGAGAAGCCTTCGCCGCTAAACGAGAAGTACTATCCGTAGAACTAACAATAACAAATGTAGAATGACTTCACGGCTGCCCTCCCCCTTACCACACATACGAAGAACCAGCATTCGTACAAATTCAATCAAATTAA
>gi|1145139851|gb|KY319959.1| Poropuntius solitus voucher SUC0319.17 cytochrome c oxidase subunit I (COI) gene, complete cds; mitochondrial
GTGGCAATCACGCGCTGATTCTTCTCTACTAACCACAAAGACATTGGTACCCTTTATCTTGTATTTGGTGCCTGAGCCGGAATAGTAGGAACCGCCTTAAGCCTTCTTATTCGGGCTGAACTTAGCCAACCCGGATCACTTCTAGGTGATGACCAAATTTATAACGTCATCGTTACCGCCCACGCCTTTGTAATAATTTTCTTTATAGTAATGCCTATCCTCATTGGAGGATTTGGGAACTGACTCGTGCCACTAATAATCGGAGCCCCAGACATAGCATTTCCACGAATAAATAACATAAGCTTTTGACTACTGCCCCCATCATTTCTGCTATTATTAGCCTCCTCTGGTGTTGAAGCTGGAGCTGGAACAGGGTGAACAGTATACCCACCTCTTGCAGGAAATCTGGCCCATGCAGGAGCATCAGTAGACCTGACAATTTTCTCGCTCCACTTAGCAGGTGTGTCATCAATTTTAGGTGCAATTAATTTTATTACCACAACTATTAACATGAAACCTCCAGCCATCTCCCAATATCAAACACCACTATTTGTCTGATCCGTGCTTGTAACCGCTGTATTACTCCTCCTATCATTACCTGTTTTAGCTGCCGGAATTACAATACTACTAACAGACCGAAACCTTAATACCACTTTCTTTGACCCAGCAGGTGGAGGAGACCCAATCCTTTACCAACACCTATTCTGATTCTTTGGGCACCCGGAAGTCTATATTCTTATTCTCCCGGGATTCGGAATTATTTCCCACGTCGTAGCCTACTACTCAGGTAAAAAAGAACCATTTGGTTATATAGGAATAGTTTGAGCCATAATGGCCATCGGCCTTCTAGGATTTATCGTATGGGCCCACCACATATTCACTGTTGGAATAGACGTAGACACTCGTGCATACTTCACATCTGCGACAATAATTATTGCAATTCCAACAGGTGTAAAAGTATTCAGCTGACTAGCCACACTTCACGGAGGGTCTATTAAATGAGAAACACCTATGCTATGGGCCCTAGGATTTATTTTCCTGTTCACAGTAGGTGGTTTAACAGGAATCGTCCTATCCAACTCATCACTAGACATTGTCCTTCATGACACCTATTATGTAGTTGCGCATTTCCACTATGTACTATCAATAGGTGCCGTATTCGCCATTATAGCAGCTTTCGTACACTGATTCCCCCTATTAACCGGATACACCCTACACAGCGCCTGAACAAAAATCCACTTTGCGGTTATGTTTATTGGGGTCAACCTCACATTCTTCCCACAACACTTCCTAGGCCTAGCAGGCATGCCACGACGATATTCTGACTATCCAGACGCCTACGCCCTGTGAAATACAGTATCATCTATTGGGTCACTAATCTCTTTAGTAGCAGTAATCATGTTCCTATTTATTCTATGAGAAGCCTTCGCCGCTAAACGAGAAGTACTATCCGTAGAACTAACAATAACAAATGTAGAATGACTTCACGGCTGCCCTCCCCCTTACCACACATACGAAGAACCAGCATTCGTACAAATTCAATCAAATTAA
>gi|1145139853|gb|KY319960.1| Poropuntius solitus voucher SCU0319.18 cytochrome c oxidase subunit I (COI) gene, complete cds; mitochondrial
GTGGCAATCACGCGCTGATTCTTCTCTACTAACCACAAAGACATTGGTACCCTTTATCTTGTATTTGGTGCCTGAGCCGGAATAGTAGGAACCGCCTTAAGCCTTCTTATTCGGGCTGAACTTAGCCAACCCGGATCACTTCTAGGTGATGACCAAATTTATAACGTCATCGTTACCGCCCACGCCTTTGTAATAATTTTCTTTATAGTAATGCCTATCCTCATTGGAGGATTTGGGAACTGACTCGTGCCACTAATAATCGGAGCCCCAGACATAGCATTTCCACGAATAAATAACATAAGCTTTTGACTACTGCCCCCATCATTTCTGCTATTATTAGCCTCCTCTGGTGTTGAAGCTGGAGCTGGAACAGGGTGAACAGTATACCCACCTCTTGCAGGAAATCTGGCCCATGCAGGAGCATCAGTAGACCTGACAATTTTCTCGCTCCACTTAGCAGGTGTATCATCAATTTTAGGTGCAATTAATTTTATTACCACAACTATTAACATGAAACCTCCAGCCATCTCCCAATATCAAACACCACTATTTGTCTGATCCGTGCTTGTAACCGCTGTATTACTCCTCCTATCATTACCTGTTTTAGCTGCCGGAATTACAATACTACTAACAGACCGAAACCTTAATACCACTTTCTTTGACCCAGCAGGTGGAGGAGACCCAATCCTTTACCAACACCTATTCTGATTCTTTGGGCACCCGGAAGTCTATATTCTTATTCTCCCGGGATTCGGAATTATTTCCCACGTCGTAGCCTACTACTCAGGTAAAAAAGAACCATTTGGTTATATAGGAATAGTTTGAGCCATAATGGCCATCGGCCTTCTAGGATTTATCGTATGGGCCCACCACATATTCACTGTTGGAATAGACGTAGACACTCGTGCATACTTCACATCTGCGACAATAATTATTGCAATTCCAACAGGTGTAAAAGTATTCAGCTGACTAGCCACACTTCACGGAGGGTCTATTAAATGAGAAACACCTATGCTATGGGCCCTAGGATTTATTTTCCTGTTCACAGTAGGTGGTTTAACAGGAATCGTCCTATCCAACTCATCACTAGACATTGTCCTTCATGACACCTATTATGTAGTTGCGCATTTCCACTATGTACTATCAATAGGTGCCGTATTCGCCATTATAGCAGCTTTCGTACACTGATTCCCCCTATTAACCGGATACACCCTACACAGCGCCTGAACAAAAATCCACTTTGCGGTTATGTTTATTGGGGTCAACCTCACATTCTTCCCACAACACTTCCTAGGCCTAGCAGGCATGCCACGGCGATATTCTGACTATCCAGACGCCTACGCCCTGTGAAATACAGTATCATCTATTGGGTCACTAATCTCTTTAGTAGCAGTAATCATGTTCCTATTTATTCTATGAGAAGCCTTCGCCGCTAAACGGGAAGTACTATCCGTAGAACTAACAATAACAAATGTAGAATGACTTCACGGCTGCCCTCCCCCTTACCACACATACGAAGAACCAGCATTCGTACAAATTCAATCAAATTAA
>gi|1145139855|gb|KY319961.1| Poropuntius solitus voucher SUC0319.19 cytochrome c oxidase subunit I (COI) gene, complete cds; mitochondrial
GTGGCAATCACGCGCTGATTCTTCTCTACTAACCACAAAGACATTGGTACCCTTTATCTTGTATTTGGTGCCTGAGCCGGAATAGTAGGAACCGCCTTAAGCCTTCTTATTCGGGCTGAACTTAGCCAACCCGGATCACTTCTAGGTGATGACCAAATTTATAACGTCATCGTTACCGCCCACGCCTTTGTAATAATTTTCTTTATAGTAATGCCTATCCTCATTGGAGGATTTGGGAACTGACTCGTGCCACTAATAATCGGAGCCCCAGACATAGCATTTCCACGAATAAATAACATAAGCTTTTGACTACTGCCCCCATCATTTCTGCTATTATTAGCCTCCTCTGGTGTTGAAGCTGGAGCTGGAACAGGGTGAACAGTATACCCACCTCTTGCAGGAAATCTGGCCCATGCAGGAGCATCAGTAGACCTGACAATTTTCTCGCTCCACTTAGCAGGTGTGTCATCAATTTTAGGTGCAATTAATTTTATTACCACAACTATTAACATGAAACCTCCAGCCATCTCCCAATATCAAACACCACTATTTGTCTGATCCGTGCTTGTAACCGCTGTATTACTCCTCCTATCATTACCTGTTTTAGCTGCCGGAATTACAATACTACTAACAGACCGAAACCTTAATACCACTTTCTTTGACCCAGCAGGTGGAGGAGACCCAATCCTTTACCAACACCTATTCTGATTCTTTGGGCACCCGGAAGTCTATATTCTTATTCTCCCGGGATTCGGAATTATTTCCCACGTCGTAGCCTACTACTCAGGTAAAAAAGAACCATTTGGTTATATAGGAATAGTTTGAGCCATAATGGCCATCGGCCTTCTAGGATTTATCGTATGGGCCCACCACATATTCACTGTTGGAATAGACGTAGACACTCGTGCATACTTCACATCTGCGACAATAATTATTGCAATTCCAACAGGTGTAAAAGTATTCAGCTGACTAGCCACACTTCACGGAGGGTCTATTAAATGAGAAACACCTATGCTATGGGCCCTAGGATTTATTTTCCTGTTCACAGTAGGTGGTTTAACAGGAATCGTCCTATCCAACTCATCACTAGACATTGTCCTTCATGACACCTATTATGTAGTTGCGCATTTCCACTATGTACTATCAATAGGTGCCGTATTCGCCATTATAGCAGCTTTCGTACACTGATTCCCCCTATTAACCGGATACACCCTACACAGCGCCTGAACAAAAATCCACTTTGCGGTTATGTTTATTGGGGTCAACCTCACATTCTTCCCACAACACTTCCTAGGCCTAGCAGGCATGCCACGACGATATTCTGACTATCCAGACGCCTACGCCCTGTGAAATACAGTATCATCTATTGGGTCACTAATCTCTTTAGTAGCAGTAATCATGTTCCTATTTATTCTATGAGAAGCCTTCGCCGCTAAACGAGAAGTACTATCCGTAGAACTAACAATAACAAATGTAGAATGACTTCACGGCTGCCCTCCCCCTTACCACACATACGAAGAACCAGCATTCGTACAAATTCAATCAAATTAA
>gi|1145139857|gb|KY319962.1| Poropuntius solitus voucher SUC0319.20 cytochrome c oxidase subunit I (COI) gene, complete cds; mitochondrial
GTGGCAATCACGCGCTGATTCTTCTCTACTAACCACAAAGACATTGGTACCCTTTATCTTGTATTTGGTGCCTGAGCCGGAATAGTAGGAACCGCCTTAAGCCTTCTTATTCGGGCTGAACTTAGCCAACCCGGATCACTTCTAGGTGATGACCAAATTTATAACGTCATCGTTACCGCCCACGCCTTTGTAATAATTTTCTTTATAGTAATGCCTATCCTCATTGGAGGATTTGGGAACTGACTCGTGCCACTAATAATCGGAGCCCCAGACATAGCATTTCCACGAATAAATAACATAAGCTTTTGACTACTGCCCCCATCATTTCTGCTATTATTAGCCTCCTCTGGTGTTGAAGCTGGAGCTGGAACAGGGTGAACAGTATACCCACCTCTTGCAGGAAATCTGGCCCATGCAGGAGCATCAGTAGACCTGACAATTTTCTCGCTCCACTTAGCAGGTGTGTCATCAATTTTAGGTGCAATTAATTTTATTACCACAACTATTAACATGAAACCTCCAGCCATCTCCCAATATCAAACACCACTATTTGTCTGATCCGTGCTTGTAACCGCTGTATTACTCCTCCTATCATTACCTGTTTTAGCTGCCGGAATTACAATACTACTAACAGACCGAAACCTTAATACCACTTTCTTTGACCCAGCAGGTGGAGGAGACCCAATCCTTTACCAACACCTATTCTGATTCTTTGGGCACCCGGAAGTCTATATTCTTATTCTCCCGGGATTCGGAATTATTTCCCACGTCGTAGCCTACTACTCAGGTAAAAAAGAACCATTTGGTTATATAGGAATAGTTTGAGCCATAATGGCCATCGGCCTTCTAGGATTTATCGTATGGGCCCACCACATATTCACTGTTGGAATAGACGTAGACACTCGTGCATACTTCACATCTGCGACAATAATTATTGCAATTCCAACAGGTGTAAAAGTATTCAGCTGACTAGCCACACTTCACGGAGGGTCTATTAAATGAGAAACACCTATGCTATGGGCCCTAGGATTTATTTTCCTGTTCACAGTAGGTGGTTTAACAGGAATCGTCCTATCCAACTCATCACTAGACATTGTCCTTCATGACACCTATTATGTAGTTGCGCATTTCCACTATGTACTATCAATAGGTGCCGTATTCGCCATTATAGCAGCTTTCGTACACTGATTCCCCCTATTAACCGGATACACCCTACACAGCGCCTGAACAAAAATCCACTTTGCGGTTATGTTTATTGGGGTCAACCTCACATTCTTCCCACAACACTTCCTAGGCCTAGCAGGCATGCCACGACGATATTCTGACTATCCAGACGCCTACGCCCTGTGAAATACAGTATCATCTATTGGGTCACTAATCTCTTTAGTAGCAGTAATCATGTTCCTATTTATTCTATGAGAAGCCTTCGCCGCTAAACGAGAAGTACTATCCGTAGAACTAACAATAACAAATGTAGAATGACTTCACGGCTGCCCTCCCCCTTACCACACATACGAAGAACCAGCATTCGTACAAATTCAATCAAATTAA
>gi|1145139859|gb|KY319963.1| Poropuntius solitus voucher SUC0319.21 cytochrome c oxidase subunit I (COI) gene, complete cds; mitochondrial
GTGGCAATCACGCGCTGATTCTTCTCTACTAACCACAAAGACATTGGTACCCTTTATCTTGTATTTGGTGCCTGAGCCGGAATAGTAGGAACCGCCTTAAGCCTTCTTATTCGGGCTGAACTTAGCCAACCCGGATCACTTCTAGGTGATGACCAAATTTATAACGTCATCGTTACCGCCCACGCCTTTGTAATAATTTTCTTTATAGTAATGCCTATCCTCATTGGAGGATTTGGGAACTGACTCGTGCCACTAATAATCGGAGCCCCAGACATAGCATTTCCACGAATAAATAACATAAGCTTTTGACTACTGCCCCCATCATTTCTGCTATTATTAGCCTCCTCTGGTGTTGAAGCTGGAGCTGGAACAGGGTGAACAGTATACCCACCTCTTGCAGGAAATCTGGCCCATGCAGGAGCATCAGTAGACCTGACAATTTTCTCGCTCCACTTAGCAGGTGTGTCATCAATTTTAGGTGCAATTAATTTTATTACCACAACTATTAACATGAAACCTCCAGCCATCTCCCAATATCAAACACCACTATTTGTCTGATCCGTGCTTGTAACCGCTGTATTACTCCTCCTATCATTACCTGTTTTAGCTGCCGGAATTACAATACTACTAACAGACCGAAACCTTAATACCACTTTCTTTGACCCAGCAGGTGGAGGAGACCCAATCCTTTACCAACACCTATTCTGATTCTTTGGGCACCCGGAAGTCTATATTCTTATTCTCCCGGGATTCGGAATTATTTCCCACGTCGTAGCCTACTACTCAGGTAAAAAAGAACCATTTGGTTATATAGGAATAGTTTGAGCCATAATGGCCATCGGCCTTCTAGGATTTATCGTATGGGCCCACCACATATTCACTGTTGGAATAGACGTAGACACTCGTGCATACTTCACATCTGCGACAATAATTATTGCAATTCCAACAGGTGTAAAAGTATTCAGCTGACTAGCCACACTTCACGGAGGGTCTATTAAATGAGAAACACCTATGCTATGGGCCCTAGGATTTATTTTCCTGTTCACAGTAGGTGGTTTAACAGGAATCGTCCTATCCAACTCATCACTAGACATTGTCCTTCATGACACCTATTATGTAGTTGCGCATTTCCACTATGTACTATCAATAGGTGCCGTATTCGCCATTATAGCAGCTTTCGTACACTGATTCCCCCTATTAACCGGATACACCCTACACAGCGCCTGAACAAAAATCCACTTTGCGGTTATGTTTATTGGGGTCAACCTCACATTCTTCCCACAACACTTCCTAGGCCTAGCAGGCATGCCACGACGATATTCTGACTATCCAGACGCCTACGCCCTGTGAAATACAGTATCATCTATTGGGTCACTAATCTCTTTAGTAGCAGTAATCATGTTCCTATTTATTCTATGAGAAGCCTTCGCCGCTAAACGAGAAGTACTATCCGTAGAACTAACAATAACAAATGTAGAATGACTTCACGGCTGCCCTCCCCCTTACCACACATACGAAGAACCAGCATTCGTACAAATTCAATCAAATTAA
>gi|1145139861|gb|KY319964.1| Poropuntius solitus voucher SUC0319.22 cytochrome c oxidase subunit I (COI) gene, complete cds; mitochondrial
GTGGCAATCACGCGCTGATTCTTCTCTACTAACCACAAAGACATTGGTACCCTTTATCTTGTATTTGGTGCCTGAGCCGGAATAGTAGGAACCGCCTTAAGCCTTCTTATTCGGGCTGAACTTAGCCAACCCGGATCACTTCTAGGTGATGACCAAATTTATAACGTCATCGTTACCGCCCACGCCTTTGTAATAATTTTCTTTATAGTAATGCCTATCCTCATTGGAGGATTTGGGAACTGACTCGTGCCACTAATAATCGGAGCCCCAGACATAGCATTTCCACGAATAAATAACATAAGCTTTTGACTACTGCCCCCATCATTTCTGCTATTATTAGCCTCCTCTGGTGTTGAAGCTGGAGCTGGAACAGGGTGAACAGTATACCCACCTCTTGCAGGAAATCTGGCCCATGCAGGAGCATCAGTAGACCTGACAATTTTCTCGCTCCACTTAGCAGGTGTGTCATCAATTTTAGGTGCAATTAATTTTATTACCACAACTATTAACATGAAACCTCCAGCCATCTCCCAATATCAAACACCACTATTTGTCTGATCCGTGCTTGTAACCGCTGTATTACTCCTCCTATCATTACCTGTTTTAGCTGCCGGAATTACAATACTACTAACAGACCGAAACCTTAATACCACTTTCTTTGACCCAGCAGGTGGAGGAGACCCAATCCTTTACCAACACCTATTCTGATTCTTTGGGCACCCGGAAGTCTATATTCTTATTCTCCCGGGATTCGGAATTATTTCCCACGTCGTAGCCTACTACTCAGGTAAAAAAGAACCATTTGGTTATATAGGAATAGTTTGAGCCATAATGGCCATCGGCCTTCTAGGATTTATCGTATGGGCCCACCACATATTCACTGTTGGAATAGACGTAGACACTCGTGCATACTTCACATCTGCGACAATAATTATTGCAATTCCAACAGGTGTAAAAGTATTCAGCTGACTAGCCACACTTCACGGAGGGTCTATTAAATGAGAAACACCTATGCTATGGGCCCTAGGATTTATTTTCCTGTTCACAGTAGGTGGTTTAACAGGAATCGTCCTATCCAACTCATCACTAGACATTGTCCTTCATGACACCTATTATGTAGTTGCGCATTTCCACTATGTACTATCAATAGGTGCCGTATTCGCCATTATAGCAGCTTTCGTACACTGATTCCCCCTATTAACCGGATACACCCTACACAGCGCCTGAACAAAAATCCACTTTGCGGTTATGTTTATTGGGGTCAACCTCACATTCTTCCCACAACACTTCCTAGGCCTAGCAGGCATGCCACGACGATATTCTGACTATCCAGACGCCTACGCCCTGTGAAATACAGTATCATCTATTGGGTCACTAATCTCTTTAGTAGCAGTAATCATGTTCCTATTTATTCTATGAGAAGCCTTCGCCGCTAAACGAGAAGTACTATCCGTAGAACTAACAATAACAAATGTAGAATGACTTCACGGCTGCCCTCCCCCTTACCACACATACGAAGAACCAGCATTCGTACAAATTCAATCAAATTAA
>gi|1145139863|gb|KY319965.1| Poropuntius solitus voucher SUC8799 cytochrome c oxidase subunit I (COI) gene, complete cds; mitochondrial
GTGGCAATCACGCGCTGATTCTTCTCTACTAACCACAAAGACATTGGTACCCTTTATCTTGTATTTGGTGCCTGAGCCGGAATAGTAGGAACCGCCTTAAGCCTTCTTATTCGGGCTGAACTTAGCCAACCCGGATCACTTCTAGGTGATGACCAAATTTATAACGTCATCGTTACCGCCCACGCCTTTGTAATAATTTTCTTTATAGTAATGCCTATCCTCATTGGAGGATTTGGGAACTGACTCGTGCCACTAATAATCGGAGCCCCAGACATAGCATTTCCACGAATAAATAACATAAGCTTTTGACTACTGCCCCCATCATTTCTGCTATTATTAGCCTCCTCTGGTGTTGAAGCTGGAGCTGGAACAGGGTGAACAGTATACCCACCTCTTGCAGGAAATCTGGCCCATGCAGGAGCATCAGTAGACCTGACAATTTTCTCGCTCCACTTAGCAGGTGTATCATCAATTTTAGGTGCAATTAATTTTATTACCACAACTATTAACATGAAACCTCCAGCCATCTCCCAATATCAAACACCACTATTTGTCTGATCCGTGCTTGTAACCGCTGTATTACTCCTCCTATCATTACCTGTTTTAGCTGCCGGAATTACAATACTACTAACAGACCGAAACCTTAATACCACTTTCTTTGACCCAGCAGGTGGAGGGGACCCAATCCTTTACCAACACCTATTCTGATTCTTTGGGCACCCGAAAGTTTATATTCTTATTCTCCCGGGATTCGGAATTATTTCCCACGTCGTAGCCTACTACTCAGGTAAAAAAGAACCATTTGGTTATATAGGAATAGTTTGAGCCATAATGGCCATCGGCCTTCTAGGATTTATCGTATGGGCCCACCACATATTCACTGTTGGAATAGACGTAGACACTCGTGCATACTTCACATCTGCGACAATAATTATTGCAATTCCAACAGGTGTAAAAGTATTCAGCTGACTAGCCACACTTCACGGAGGGTCTATTAAATGAGAAACACCTATGCTATGGGCCCTAGGATTTATTTTCCTGTTCACAGTAGGTGGTTTAACAGGAATCGTCCTATCCAACTCATCACTAGACATTGTCCTTCATGACACCTATTATGTAGTTGCGCATTTCCACTATGTACTATCAATAGGTGCCGTATTCGCCATTATAGCAGCTTTCGTACACTGATTCCCCCTATTAACCGGATACACCCTACACAGCGCCTGAACAAAAATCCACTTTGCGGTTATGTTTATTGGGGTCAACCTCACATTCTTCCCACAACACTTCCTAGGCCTAGCAGGCATGCCACGACGATATTCTGACTATCCAGACGCCTACGCCCTGTGAAATACAGTATCATCTATTGGGTCACTAATCTCTTTAGTAGCAGTAATCATGTTCCTATTTATTCTATGAGAAGCCTTCGCCGCTAAACGGGAAGTACTATCCGTAGAACTAACAATAACAAATGTAGAATGACTTCACGGCTGCCCTCCCCCTTACCACACATACGAAGAACCAGCATTCGTACAAATTCAATCAAATTAA
>gi|1145139865|gb|KY319966.1| Poropuntius solitus voucher SUC8800 cytochrome c oxidase subunit I (COI) gene, complete cds; mitochondrial
GTGGCAATCACGCGCTGATTCTTCTCTACTAACCACAAAGACATTGGTACCCTTTATCTTGTATTTGGTGCCTGAGCCGGAATAGTAGGAACCGCCTTAAGCCTTCTTATTCGGGCTGAACTTAGCCAACCCGGATCACTTCTAGGTGATGACCAAATTTATAACGTCATCGTTACCGCCCACGCCTTTGTAATAATTTTCTTTATAGTAATGCCTATCCTCATTGGAGGATTTGGGAACTGACTCGTGCCACTAATAATCGGAGCCCCAGACATAGCATTTCCACGAATAAATAACATAAGCTTTTGACTACTGCCCCCATCATTTCTGCTATTATTAGCCTCCTCTGGTGTTGAAGCTGGAGCTGGAACAGGGTGAACAGTATACCCACCTCTTGCAGGAAATCTGGCCCATGCAGGAGCATCAGTAGACCTGACAATTTTCTCGCTCCACTTAGCAGGTGTGTCATCAATTTTAGGTGCAATTAATTTTATTACCACAACTATTAACATGAAACCTCCAGCCATCTCCCAATATCAAACACCACTATTTGTCTGATCCGTGCTTGTAACCGCTGTATTACTCCTCCTATCATTACCTGTTTTAGCTGCCGGAATTACAATACTACTAACAGACCGAAACCTTAATACCACTTTCTTTGACCCAGCAGGTGGAGGGGACCCAATCCTTTACCAACACCTATTCTGATTCTTTGGGCACCCGAAAGTTTATATTCTTATTCTCCCGGGATTCGGAATTATTTCCCACGTCGTAGCCTACTACTCAGGTAAAAAAGAACCATTTGGTTATATAGGAATAGTTTGAGCCATAATGGCCATCGGCCTTCTAGGATTTATCGTATGGGCCCACCACATATTCACTGTTGGAATAGACGTAGACACTCGTGCATACTTCACATCTGCGACAATAATTATTGCAATTCCAACAGGTGTAAAAGTATTCAGCTGACTAGCCACACTTCACGGAGGGTCTATTAAATGAGAAACACCTATGCTATGGGCCCTAGGATTTATTTTCCTGTTCACAGTAGGTGGTTTAACAGGAATCGTCCTATCCAACTCATCACTAGACATTGTCCTTCATGACACCTATTATGTAGTTGCGCATTTCCACTATGTACTATCAATAGGTGCCGTATTCGCCATTATAGCAGCTTTCGTACACTGATTCCCCCTATTAACCGGATACACCCTACACAGCGCCTGAACAAAAATCCACTTTGCGGTTATGTTTATTGGGGTCAACCTCACATTCTTCCCACAACACTTCCTAGGCCTAGCAGGCATGCCACGACGATATTCTGACTATCCAGACGCCTACGCCCTGTGAAATACAGTATCATCTATTGGGTCACTAATCTCTTTAGTAGCAGTAATCATGTTCCTATTTATTCTATGAGAAGCCTTCGCCGCTAAACGGGAAGTACTATCCGTAGAACTAACAATAACAAATGTAGAATGACTTCACGGCTGCCCTCCCCCTTACCACACATACGAAGAACCAGCATTCGTACAAATTCAATCAAATTAA
>gi|1145139867|gb|KY319967.1| Poropuntius solitus voucher SUC8801 cytochrome c oxidase subunit I (COI) gene, complete cds; mitochondrial
GTGGCAATCACGCGCTGATTCTTCTCTACTAACCACAAAGACATTGGTACCCTTTATCTTGTATTTGGTGCCTGAGCCGGAATAGTAGGAACCGCCTTAAGCCTTCTTATTCGGGCTGAACTTAGCCAACCCGGATCACTTCTAGGTGATGACCAAATTTATAACGTCATCGTTACCGCCCACGCCTTTGTAATAATTTTCTTTATAGTAATGCCTATCCTCATTGGAGGATTTGGGAACTGACTCGTGCCACTAATAATCGGAGCCCCAGACATAGCATTTCCACGAATAAATAACATAAGCTTTTGACTACTGCCCCCATCATTTCTGCTATTATTAGCCTCCTCTGGTGTTGAAGCTGGAGCTGGAACAGGGTGAACAGTATACCCACCTCTTGCAGGAAATCTGGCCCATGCAGGAGCATCAGTAGACCTGACAATTTTCTCGCTCCACTTAGCAGGTGTGTCATCAATTTTAGGTGCAATTAATTTTATTACCACAACTATTAACATGAAACCTCCAGCCATCTCCCAATATCAAACACCACTATTTGTCTGATCCGTGCTTGTAACCGCTGTATTACTCCTCCTATCATTACCTGTTTTAGCTGCCGGAATTACAATACTACTAACAGACCGAAACCTTAATACCACTTTCTTTGACCCAGCAGGTGGAGGGGACCCAATCCTTTACCAACACCTATTCTGATTCTTTGGGCACCCGAAAGTTTATATTCTTATTCTCCCGGGATTCGGAATTATTTCCCACGTCGTAGCCTACTACTCAGGTAAAAAAGAACCATTTGGTTATATAGGAATAGTTTGAGCCATAATGGCCATCGGCCTTCTAGGATTTATCGTATGGGCCCACCACATATTCACTGTTGGAATAGACGTAGACACTCGTGCATACTTCACATCTGCGACAATAATTATTGCAATTCCAACAGGTGTAAAAGTATTCAGCTGACTAGCCACACTTCACGGAGGGTCTATTAAATGAGAAACACCTATGCTATGGGCCCTAGGATTTATTTTCCTGTTCACAGTAGGTGGTTTAACAGGAATCGTCCTATCCAACTCATCACTAGACATTGTCCTTCATGACACCTATTATGTAGTTGCGCATTTCCACTATGTACTATCAATAGGTGCCGTATTCGCCATTATAGCAGCTTTCGTACACTGATTCCCCCTATTAACCGGATACACCCTACACAGCGCCTGAACAAAAATCCACTTTGCGGTTATGTTTATTGGGGTCAACCTCACATTCTTCCCACAACACTTCCTAGGCCTAGCAGGCATGCCACGACGATATTCTGACTATCCAGACGCCTACGCCCTGTGAAATACAGTATCATCTATTGGGTCACTAATCTCTTTAGTAGCAGTAATCATGTTCCTATTTATTCTATGAGAAGCCTTCGCCGCTAAACGGGAAGTACTATCCGTAGAACTAACAATAACAAATGTAGAATGACTTCACGGCTGCCCTCCCCCTTACCACACATACGAAGAACCAGCATTCGTACAAATTCAATCAAATTAA
>gi|1145139869|gb|KY319968.1| Poropuntius solitus voucher SUC8802 cytochrome c oxidase subunit I (COI) gene, complete cds; mitochondrial
GTGGCAATCACGCGCTGATTCTTCTCTACTAACCACAAAGACATTGGTACCCTTTATCTTGTATTTGGTGCCTGAGCCGGAATAGTAGGAACCGCCTTAAGCCTTCTTATTCGGGCTGAACTTAGCCAACCCGGATCACTTCTAGGTGATGACCAAATTTATAACGTCATCGTTACCGCCCACGCCTTTGTAATAATTTTCTTTATAGTAATGCCTATCCTCATTGGAGGATTTGGGAACTGACTCGTGCCACTAATAATCGGAGCCCCAGACATAGCATTTCCACGAATAAATAACATAAGCTTTTGACTACTGCCCCCATCATTTCTGCTATTATTAGCCTCCTCTGGTGTTGAAGCTGGAGCTGGAACAGGGTGAACAGTATACCCACCTCTTGCAGGAAATCTGGCCCATGCAGGAGCATCAGTAGACCTGACAATTTTCTCGCTCCACTTAGCAGGTGTATCATCAATTTTAGGTGCAATTAATTTTATTACCACAACTATTAACATGAAACCTCCAGCCATCTCCCAATATCAAACACCACTATTTGTCTGATCCGTGCTTGTAACCGCTGTATTACTCCTCCTATCATTACCTGTTTTAGCTGCCGGAATTACAATACTACTAACAGACCGAAACCTTAATACCACTTTCTTTGACCCAGCAGGTGGAGGGGACCCAATCCTTTACCAACACCTATTCTGATTCTTTGGGCACCCGAAAGTTTATATTCTTATTCTCCCGGGATTCGGAATTATTTCCCACGTCGTAGCCTACTACTCAGGTAAAAAAGAACCATTTGGTTACATAGGAATAGTTTGAGCCATAATGGCCATCGGCCTTCTAGGATTTATCGTATGGGCCCACCACATATTCACTGTTGGAATAGACGTAGACACTCGTGCATACTTCACATCTGCGACAATAATTATTGCAATTCCAACAGGTGTAAAAGTATTCAGCTGACTAGCCACACTTCACGGAGGGTCTATTAAATGAGAAACACCTATGCTATGGGCCCTAGGATTTATTTTCCTGTTCACAGTAGGTGGTTTAACAGGAATCGTCCTATCCAACTCATCACTAGACATTGTCCTTCATGACACCTATTATGTAGTTGCGCATTTCCACTATGTACTATCAATAGGTGCCGTATTCGCCATTATAGCAGCTTTCGTACACTGATTCCCCCTATTAACCGGATACACCCTACACAGCGCCTGAACAAAAATCCACTTTGCGGTTATGTTTATTGGGGTCAACCTCACATTCTTCCCACAACACTTCCTAGGCCTAGCAGGCATGCCACGACGATATTCTGACTATCCAGACGCCTACGCCCTGTGAAATACAGTATCATCTATTGGGTCACTAATCTCTTTAGTAGCAGTAATCATGTTCCTATTTATTCTATGAGAAGCCTTCGCCGCTAAACGGGAAGTACTATCCGTAGAACTAACAATAACAAATGTAGAATGACTTCACGGCTGCCCTCCCCCTTACCACACATACGAAGAACCAGCATTCGTACAAATTCAATCAAATTAA
>gi|1145139871|gb|KY319969.1| Poropuntius solitus voucher SUC8803 cytochrome c oxidase subunit I (COI) gene, complete cds; mitochondrial
GTGGCAATCACGCGCTGATTCTTCTCTACTAACCACAAAGACATTGGTACCCTTTATCTTGTATTTGGTGCCTGAGCCGGAATAGTAGGAACCGCCTTAAGCCTTCTTATTCGGGCTGAACTTAGCCAACCCGGATCACTTCTAGGTGATGACCAAATTTATAACGTCATCGTTACCGCCCACGCCTTTGTAATAATTTTCTTTATAGTAATGCCTATCCTCATTGGAGGATTTGGGAACTGACTCGTGCCACTAATAATCGGAGCCCCAGACATAGCATTTCCACGAATAAATAACATAAGCTTTTGACTACTGCCCCCATCATTTCTGCTATTATTAGCCTCCTCTGGTGTTGAAGCTGGAGCTGGAACAGGGTGAACAGTATACCCACCTCTTGCAGGAAATCTGGCCCATGCAGGAGCATCAGTAGACCTGACAATTTTCTCGCTCCACTTAGCAGGTGTATCATCAATTTTAGGTGCAATTAATTTTATTACCACAACTATTAACATGAAACCTCCAGCCATCTCCCAATATCAAACACCACTATTTGTCTGATCCGTGCTTGTAACCGCTGTATTACTCCTCCTATCATTACCTGTTTTAGCTGCCGGAATTACAATACTACTAACAGACCGAAACCTTAATACCACTTTCTTTGACCCAGCAGGTGGAGGGGACCCAATCCTTTACCAACACCTATTCTGATTCTTTGGGCACCCGAAAGTTTATATTCTTATTCTCCCGGGATTCGGAATTATTTCCCACGTCGTAGCCTACTACTCAGGTAAAAAAGAACCATTTGGTTATATAGGAATAGTTTGAGCCATAATGGCCATCGGCCTTCTAGGATTTATCGTATGGGCCCACCACATATTCACTGTTGGAATAGACGTAGACACTCGTGCATACTTCACATCTGCGACAATAATTATTGCAATTCCAACAGGTGTAAAAGTATTCAGCTGACTAGCCACACTTCACGGAGGGTCTATTAAATGAGAAACACCTATGCTATGGGCCCTAGGATTTATTTTCCTGTTCACAGTAGGTGGTTTAACAGGAATCGTCCTATCCAACTCATCACTAGACATTGTCCTTCATGACACCTATTATGTAGTTGCGCATTTCCACTATGTACTATCAATAGGTGCCGTATTCGCCATTATAGCAGCTTTCGTACACTGATTCCCCCTATTAACCGGATACACCCTACACAGCGCCTGAACAAAAATCCACTTTGCGGTTATGTTTATTGGGGTCAACCTCACATTCTTCCCACAACACTTCCTAGGCCTAGCAGGCATGCCACGACGATATTCTGACTATCCAGACGCCTACGCCCTGTGAAATACAGTATCATCTATTGGGTCACTAATCTCTTTAGTAGCAGTAATCATGTTCCTATTTATTCTATGAGAAGCCTTCGCCGCTAAACGGGAAGTACTATCCGTAGAACTAACAATAACAAATGTAGAATGACTTCACGGCTGCCCTCCCCCTTACCACACATACGAAGAACCAGCATTCGTACAAATTCAATCAAATTAA
>gi|1145139873|gb|KY319970.1| Poropuntius solitus voucher SUC8804 cytochrome c oxidase subunit I (COI) gene, complete cds; mitochondrial
GTGGCAATCACGCGCTGATTCTTCTCTACTAACCACAAAGACATTGGTACCCTTTATCTTGTATTTGGTGCCTGAGCCGGAATAGTAGGAACCGCCTTAAGCCTTCTTATTCGGGCTGAACTTAGCCAACCCGGATCACTTCTAGGTGATGACCAAATTTATAACGTCATCGTTACCGCCCACGCCTTTGTAATAATTTTCTTTATAGTAATGCCTATCCTCATTGGAGGATTTGGGAACTGACTCGTGCCACTAATAATCGGAGCCCCAGACATAGCATTTCCACGAATAAATAACATAAGCTTTTGACTACTGCCCCCATCATTTCTGCTATTATTAGCCTCCTCTGGTGTTGAAGCTGGAGCTGGAACAGGGTGAACAGTATACCCACCTCTTGCAGGAAATCTGGCCCATGCAGGAGCATCAGTAGACCTGACAATTTTCTCGCTCCACTTAGCAGGTGTATCATCAATTTTAGGTGCAATTAATTTTATTACCACAACTATTAACATGAAACCTCCAGCCATCTCCCAATATCAAACACCACTATTTGTCTGATCCGTGCTTGTAACCGCTGTATTACTCCTCCTATCATTACCTGTTTTAGCTGCCGGAATTACAATACTACTAACAGACCGAAACCTTAATACCACTTTCTTTGACCCAGCAGGTGGAGGGGACCCAATCCTTTACCAACACCTATTCTGATTCTTTGGGCACCCGAAAGTTTATATTCTTATTCTCCCGGTATTCGGAATTATTTCCCACGTCGTAGCCTACTACTCAGGTAAAAAAGAACCATTTGGTTATATAGGAATAGTTTGAGCCATAATGGCCATCGGCCTTCTAGGATTTATCGTATGGGCCCACCACATATTCACTGTTGGAATAGACGTAGACACTCGTGCATACTTCACATCTGCGACAATAATTATTGCAATTCCAACAGGTGTAAAAGTATTCAGCTGACTAGCCACACTTCACGGAGGGTCTATTAAATGAGAAACACCTATGCTATGGGCCCTAGGATTTATTTTCCTGTTCACAGTAGGTGGTTTAACAGGAATCGTCCTATCCAACTCATCACTAGACATTGTCCTTCATGACACCTATTATGTAGTTGCGCATTTCCACTATGTACTATCAATAGGTGCCGTATTCGCCATTATAGCAGCTTTCGTACACTGATTCCCCCTATTAACCGGATACACCCTACACAGCGCCTGAACAAAAATCCACTTTGCGGTTATGTTTATTGGGGTCAACCTCACATTCTTCCCACAACACTTCCTAGGCCTAGCAGGCATGCCACGACGATATTCTGACTATCCAGACGCCTACGCCCTGTGAAATACAGTATCATCTATTGGGTCACTAATCTCTTTAGTAGCAGTAATCATGTTCCTATTTATTCTATGAGAAGCCTTCGCCGCTAAACGGGAAGTACTATCCGTAGAACTAACAATAACAAATGTAGAATGACTTCACGGCTGCCCTCCCCCTTACCACACATACGAAGAACCAGCATTCGTACAAATTCAATCAAATTAA
>gi|1145139875|gb|KY319971.1| Poropuntius solitus voucher SUC8805 cytochrome c oxidase subunit I (COI) gene, complete cds; mitochondrial
GTGGCAATCACGCGCTGATTCTTCTCTACTAACCACAAAGACATTGGTACCCTTTATCTTGTATTTGGTGCCTGAGCCGGAATAGTAGGAACCGCCTTAAGCCTTCTTATTCGGGCTGAACTTAGCCAACCCGGATCACTTCTAGGTGATGACCAAATTTATAACGTCATCGTTACCGCCCACGCCTTTGTAATAATTTTCTTTATAGTAATGCCTATCCTCATTGGAGGATTTGGGAACTGACTCGTGCCACTAATAATCGGAGCCCCAGACATAGCATTTCCACGAATAAATAACATAAGCTTTTGACTACTGCCCCCATCATTTCTGCTATTATTAGCCTCCTCTGGTGTTGAAGCTGGAGCTGGAACAGGGTGAACAGTATACCCACCTCTTGCAGGAAATCTGGCCCATGCAGGAGCATCAGTAGACCTGACAATTTTCTCGCTCCACTTAGCAGGTGTGTCATCAATTTTAGGTGCAATTAATTTTATTACCACAACTATTAACATGAAACCTCCAGCCATCTCCCAATATCAAACACCACTATTTGTCTGATCCGTGCTTGTAACCGCTGTATTACTCCTCCTATCATTACCTGTTTTAGCTGCCGGAATTACAATACTACTAACAGACCGAAACCTTAATACCACTTTCTTTGACCCAGCAGGTGGAGGGGACCCAATCCTTTACCAACACCTATTCTGATTCTTTGGGCACCCGAAAGTTTATATTCTTATTCTCCCGGGATTCGGAATTATTTCCCACGTCGTAGCCTACTACTCAGGTAAAAAAGAACCATTTGGTTATATAGGAATAGTTTGAGCCATAATGGCCATCGGCCTTCTAGGATTTATCGTATGGGCCCACCACATATTCACTGTTGGAATAGACGTAGACACTCGTGCATACTTCACATCTGCGACAATAATTATTGCAATTCCAACAGGTGTAAAAGTATTCAGCTGACTAGCCACACTTCACGGAGGGTCTATTAAATGAGAAACACCTATGCTATGGGCCCTAGGATTTATTTTCCTGTTCACAGTAGGTGGTTTAACAGGAATCGTCCTATCCAACTCATCACTAGACATTGTCCTTCATGACACCTATTATGTAGTTGCGCATTTCCACTATGTACTATCAATAGGTGCCGTATTCGCCATTATAGCAGCTTTCGTACACTGATTCCCCCTATTAACCGGATACACCCTACACAGCGCCTGAACAAAAATCCACTTTGCGGTTATGTTTATTGGGGTCAACCTCACATTCTTCCCACAACACTTCCTAGGCCTAGCAGGCATGCCACGACGATATTCTGACTATCCAGACGCCTACGCCCTGTGAAATACAGTATCATCTATTGGGTCACTAATCTCTTTAGTAGCAGTAATCATGTTCCTATTTATTCTATGAGAAGCCTTCGCCGCTAAACGGGAAGTACTATCCGTAGAACTAACAATAACAAATGTAGAATGACTTCACGGCTGCCCTCCCCCTTACCACACATACGAAGAACCAGCATTCGTACAAATTCAATCAAATTAA
>gi|1145139877|gb|KY319972.1| Poropuntius solitus voucher SUC8806 cytochrome c oxidase subunit I (COI) gene, complete cds; mitochondrial
GTGGCAATCACGCGCTGATTCTTCTCTACTAACCACAAAGACATTGGTACCCTTTATCTTGTATTTGGTGCCTGAGCCGGAATAGTAGGAACCGCCTTAAGCCTTCTTATTCGGGCTGAACTTAGCCAACCCGGATCACTTCTAGGTGATGACCAAATTTATAACGTCATCGTTACCGCCCACGCCTTTGTAATAATTTTCTTTATAGTAATGCCTATCCTCATTGGAGGATTTGGGAACTGACTCGTGCCACTAATAATCGGAGCCCCAGACATAGCATTTCCACGAATAAATAACATAAGCTTTTGACTACTGCCCCCATCATTTCTGCTATTATTAGCCTCCTCTGGTGTTGAAGCTGGAGCTGGAACAGGGTGAACAGTATACCCACCTCTTGCAGGAAATCTGGCCCATGCAGGAGCATCAGTAGACCTGACAATTTTCTCGCTCCACTTAGCAGGTGTGTCATCAATTTTAGGTGCAATTAATTTTATTACCACAACTATTAACATGAAACCTCCAGCCATCTCCCAATATCAAACACCACTATTTGTCTGATCCGTGCTTGTAACCGCTGTATTACTCCTCCTATCATTACCTGTTTTAGCTGCCGGAATTACAATACTACTAACAGACCGAAACCTTAATACCACTTTCTTTGACCCAGCAGGTGGAGGGGACCCAATCCTTTACCAACACCTATTCTGATTCTTTGGGCACCCGAAAGTTTATATTCTTATTCTCCCGGGATTCGGAATTATTTCCCACGTCGTAGCCTACTACTCAGGTAAAAAAGAACCATTTGGTTATATAGGAATAGTTTGAGCCATAATGGCCATCGGCCTTCTAGGATTTATCGTATGGGCCCACCACATATTCACTGTTGGAATAGACGTAGACACTCGTGCATACTTCACATCTGCGACAATAATTATTGCAATTCCAACAGGTGTAAAAGTATTCAGCTGACTAGCCACACTTCACGGAGGGTCTATTAAATGAGAAACACCTATGCTATGGGCCCTAGGATTTATTTTCCTGTTCACAGTAGGTGGTTTAACAGGAATCGTCCTATCCAACTCATCACTAGACATTGTCCTTCATGACACCTATTATGTAGTTGCGCATTTCCACTATGTACTATCAATAGGTGCCGTATTCGCCATTATAGCAGCTTTCGTACACTGATTCCCCCTATTAACCGGATACACCCTACACAGCGCCTGAACAAAAATCCACTTTGCGGTTATGTTTATTGGGGTCAACCTCACATTCTTCCCACAACACTTCCTAGGCCTAGCAGGCATGCCACGACGATATTCTGACTATCCAGACGCCTACGCCCTGTGAAATACAGTATCATCTATTGGGTCACTAATCTCTTTAGTAGCAGTAATCATGTTCCTATTTATTCTATGAGAAGCCTTCGCCGCTAAACGGGAAGTACTATCCGTAGAACTAACAATAACAAATGTAGAATGACTTCACGGCTGCCCTCCCCCTTACCACACATACGAAGAACCAGCATTCGTACAAATTCAATCAAATTAA
>gi|1145139879|gb|KY319973.1| Poropuntius solitus voucher SUC8807 cytochrome c oxidase subunit I (COI) gene, complete cds; mitochondrial
GTGGCAATCACGCGCTGATTCTTCTCTACTAACCACAAAGACATTGGTACCCTTTATCTTGTATTTGGTGCCTGAGCCGGAATAGTAGGAACCGCCTTAAGCCTTCTTATTCGGGCTGAACTTAGCCAACCCGGATCACTTCTAGGTGATGACCAAATTTATAACGTCATCGTTACCGCCCACGCCTTTGTAATAATTTTCTTTATAGTAATGCCTATCCTCATTGGAGGATTTGGGAACTGACTCGTGCCACTAATAATCGGAGCCCCAGACATAGCATTTCCACGAATAAATAACATAAGCTTTTGACTACTGCCCCCATCATTTCTGCTATTATTAGCCTCCTCTGGTGTTGAAGCTGGAGCTGGAACAGGGTGAACAGTATACCCACCTCTTGCAGGAAATCTGGCCCATGCAGGAGCATCAGTAGACCTGACAATTTTCTCGCTCCACTTAGCAGGTGTGTCATCAATTTTAGGTGCAATTAATTTTATTACCACAACTATTAACATGAAACCTCCAGCCATCTCCCAATATCAAACACCACTATTTGTCTGATCCGTGCTTGTAACCGCTGTATTACTCCTCCTATCATTACCTGTTTTAGCTGCCGGAATTACAATACTACTAACAGACCGAAACCTTAATACCACTTTCTTTGACCCAGCAGGTGGAGGGGACCCAATCCTTTACCAACACCTATTCTGATTCTTTGGGCACCCGAAAGTTTATATTCTTATTCTCCCGGGATTCGGAATTATTTCCCACGTCGTAGCCTACTACTCAGGTAAAAAAGAACCATTTGGTTATATAGGAATAGTTTGAGCCATAATGGCCATCGGCCTTCTAGGATTTATCGTATGGGCCCACCACATATTCACTGTTGGAATAGACGTAGACACTCGTGCATACTTCACATCTGCGACAATAATTATTGCAATTCCAACAGGTGTAAAAGTATTCAGCTGACTAGCCACACTTCACGGAGGGTCTATTAAATGAGAAACACCTATGCTATGGGCCCTAGGATTTATTTTCCTGTTCACAGTAGGTGGTTTAACAGGAATCGTCCTATCCAACTCATCACTAGACATTGTCCTTCATGACACCTATTATGTAGTTGCGCATTTCCACTATGTACTATCAATAGGTGCCGTATTCGCCATTATAGCAGCTTTCGTACACTGATTCCCCCTATTAACCGGATACACCCTACACAGCGCCTGAACAAAAATCCACTTTGCGGTTATGTTTATTGGGGTCAACCTCACATTCTTCCCACAACACTTCCTAGGCCTAGCAGGCATGCCACGACGATATTCTGACTATCCAGACGCCTACGCCCTGTGAAATACAGTATCATCTATTGGGTCACTAATCTCTTTAGTAGCAGTAATCATGTTCCTATTTATTCTATGAGAAGCCTTCGCCGCTAAACGGGAAGTACTATCCGTAGAACTAACAATAACAAATGTAGAATGACTTCACGGCTGCCCTCCCCCTTACCACACATACGAAGAACCAGCATTCGTACAAATTCAATCAAATTAA
>gi|1145139881|gb|KY319974.1| Poropuntius solitus voucher SUC8808 cytochrome c oxidase subunit I (COI) gene, complete cds; mitochondrial
GTGGCAATCACGCGCTGATTCTTCTCTACTAACCACAAAGACATTGGTACCCTTTATCTTGTATTTGGTGCCTGAGCCGGAATAGTAGGAACCGCCTTAAGCCTTCTTATTCGGGCTGAACTTAGCCAACCCGGATCACTTCTAGGTGATGACCAAATTTATAACGTCATCGTTACCGCCCACGCCTTTGTAATAATTTTCTTTATAGTAATGCCTATCCTCATTGGAGGATTTGGGAACTGACTCGTGCCACTAATAATCGGAGCCCCAGACATAGCATTTCCACGAATAAATAACATAAGCTTTTGACTACTGCCCCCATCATTTCTGCTATTATTAGCCTCCTCTGGTGTTGAAGCTGGAGCTGGAACAGGGTGAACAGTATACCCACCTCTTGCAGGAAATCTGGCCCATGCAGGAGCATCAGTAGACCTGACAATTTTCTCGCTCCACTTAGCAGGTGTATCATCAATTTTAGGTGCAATTAATTTTATTACCACAACTATTAACATGAAACCTCCAGCCATCTCCCAATATCAAACACCACTATTTGTCTGATCCGTGCTTGTAACCGCTGTATTACTCCTCCTATCATTACCTGTTTTAGCTGCCGGAATTACAATACTACTAACAGACCGAAACCTTAATACCACTTTCTTTGACCCAGCAGGTGGAGGGGACCCAATCCTTTACCAACACCTATTCTGATTCTTTGGGCACCCGAAAGTTTATATTCTTATTCTCCCGGGATTCGGAATTATTTCCCACGTCGTAGCCTACTACTCAGGTAAAAAAGAACCATTTGGTTATATAGGAATAGTTTGAGCCATAATGGCCATCGGCCTTCTAGGATTTATCGTATGGGCCCACCACATATTCACTGTTGGAATAGACGTAGACACTCGTGCATACTTCACATCTGCGACAATAATTATTGCAATTCCAACAGGTGTAAAAGTATTCAGCTGACTAGCCACACTTCACGGAGGGTCTATTAAATGAGAAACACCTATGCTATGGGCCCTAGGATTTATTTTCCTGTTCACAGTAGGTGGTTTAACAGGAATCGTCCTATCCAACTCATCACTAGACATTGTCCTTCATGACACCTATTATGTAGTTGCGCATTTCCACTATGTACTATCAATAGGTGCCGTATTCGCCATTATAGCAGCTTTCGTACACTGATTCCCCCTATTAACCGGATACACCCTACACAGCGCCTGAACAAAAATCCACTTTGCGGTTATGTTTATTGGGGTCAACCTCACATTCTTCCCACAACACTTCCTAGGCCTAGCAGGCATGCCACGACGATATTCTGACTATCCAGACGCCTACGCCCTGTGAAATACAGTATCATCTATTGGGTCACTAATCTCTTTAGTAGCAGTAATCATGTTCCTATTTATTCTATGAGAAGCCTTCGCCGCTAAACGGGAAGTACTATCCGTAGAACTAACAATAACAAATGTAGAATGACTTCACGGCTGCCCTCCCCCTTACCACACATACGAAGAACCAGCATTCGTACAAATTCAATCAAATTAA
>gi|1145139883|gb|KY319975.1| Poropuntius sp. Xe Pian voucher SUC8809 cytochrome c oxidase subunit I (COI) gene, complete cds; mitochondrial
GTGGCAATCACGCGCTGATTCTTCTCTACTAACCACAAAGACATTGGTACCCTTTATCTTGTATTTGGTGCCTGAGCCGGAATAGTAGGAACCGCCTTAAGCCTTCTTATTCGGGCTGAACTTAGCCAACCCGGATCACTTCTAGGTGATGACCAAATTTATAACGTCATCGTTACCGCCCACGCCTTTGTAATAATTTTCTTTATAGTAATGCCTATCCTCATTGGAGGATTTGGGAACTGACTCGTGCCACTAATAATCGGAGCCCCAGACATAGCATTTCCACGAATAAATAACATAAGCTTTTGACTACTGCCCCCATCATTTCTGCTATTATTAGCCTCCTCTGGTGTTGAAGCTGGAGCTGGAACAGGGTGAACAGTATACCCACCTCTTGCAGGAAATCTAGCCCATGCAGGAGCATCAGTAGACCTGACAATTTTCTCGCTCCACTTAGCAGGTGTGTCATCAATTTTAGGTGCAATTAATTTTATTACCACAACTATTAACATGAAACCTCCAGCCATCTCCCAATATCAAACACCACTATTTGTCTGATCCGTGCTTGTAACCGCTGTATTACTCCTCCTATCATTACCTGTTTTAGCTGCCGGAATTACAATACTACTAACAGACCGAAACCTTAATACCACTTTCTTTGACCCAGCAGGGGGAGGGGACCCAATCCTTTACCAACACCTATTCTGATTCTTTGGGCACCCGAAAGTTTATATTCTTATTCTCCCGGGATTCGGAATTATTTCCCACGTCGTAGCCTACTACTCAGGTAAAAAAGAACCATTTGGTTATATAGGAATAGTTTGAGCCATAATGGCCATCGGCCTTCTAGGATTTATCGTATGGGCCCACCACATATTCACTGTTGGAATAGACGTAGACACTCGTGCATACTTCACATCTGCGACAATAATTATTGCAATTCCAACAGGTGTAAAAGTATTCAGCTGACTAGCCACACTTCACGGAGGGTCTATTAAATGAGAAACACCTATGCTATGGGCCCTAGGATTTATTTTCCTGTTCACAGTAGGTGGTTTAACAGGAATCGTCCTATCCAACTCATCACTAGACATTGTCCTTCATGACACCTATTATGTAGTTGCGCATTTCCACTATGTACTATCAATAGGTGCCGTATTCGCCATTATAGCAGCTTTCGTACACTGATTCCCCCTATTAACCGGATATACCCTACACAGCGCCTGAACAAAAATCCACTTTGCGGTTATGTTTATTGGGGTCAACCTCACATTCTTCCCACAACACTTCCTAGGCCTAGCAGGCATGCCACGACGATATTCTGACTATCCAGACGCCTACGCCCTGTGAAATACAGTATCATCTATTGGGTCACTAATCTCTTTAGTAGCAGTAATCATGTTCCTATTTATTCTATGAGAAGCCTTCGCCGCTAAACGGGAAGTACTATCCGTAGAACTAACAATAACAAATGTAGAATGACTTCACGGCTGCCCTCCCCCTTACCACACATACGAAGAACCAGCATTCGTACAAATTCAATCAAATTAA
>gi|1145139885|gb|KY319976.1| Poropuntius sp. Xe Pian voucher SUC8810 cytochrome c oxidase subunit I (COI) gene, complete cds; mitochondrial
GTGGCAATCACGCGCTGATTCTTCTCTACTAACCACAAAGACATTGGTACCCTTTATCTTGTATTTGGTGCCTGAGCCGGAATAGTAGGAACCGCCTTAAGCCTTCTTATTCGGGCTGAACTTAGCCAACCCGGATCACTTCTAGGTGATGACCAAATTTATAACGTCATCGTTACCGCCCACGCCTTTGTAATAATTTTCTTTATAGTAATGCCTATCCTCATTGGAGGATTTGGGAACTGACTCGTGCCACTAATAATCGGAGCCCCAGACATAGCATTTCCACGAATAAATAACATAAGCTTTTGACTACTGCCCCCATCATTTCTGCTATTATTAGCCTCCTCTGGTGTTGAAGCTGGAGCTGGAACAGGGTGAACAGTATACCCACCTCTTGCAGGAAATCTGGCCCATGCAGGAGCATCAGTAGACCTGACAATTTTCTCGCTCCACTTAGCAGGTGTGTCATCAATTTTAGGTGCAATTAATTTTATTACCACAACTATTAACATGAAACCTCCAGCCATCTCCCAATATCAAACACCACTATTTGTCTGATCCGTGCTTGTAACCGCTGTATTACTCCTCCTATCATTACCTGTTTTAGCTGCCGGAATTACAATACTACTAACAGACCGAAACCTTAATACCACTTTCTTTGACCCAGCAGGTGGAGGGGACCCAATCCTTTACCAACACCTATTCTGATTCTTTGGGCACCCGAAAGTTTATATTCTTATTCTCCCGGGATTCGGAATTATTTCCCACGTCGTAGCCTACTACTCAGGTAAAAAAGAACCATTTGGTTATATAGGAATAGTTTGAGCCATAATGGCCATCGGCCTTCTAGGATTTATCGTATGGGCCCACCACATATTCACTGTTGGAATAGACGTAGACACTCGTGCATACTTCACATCTGCGACAATAATTATTGCAATTCCAACAGGTGTAAAAGTATTCAGCTGACTAGCCACACTTCACGGAGGGTCTATTAAATGAGAAACACCTATGCTATGGGCCCTAGGATTTATTTTCCTGTTCACAGTAGGTGGTTTAACAGGAATCGTCCTATCCAACTCATCACTAGACATTGTCCTTCATGACACCTATTATGTAGTTGCGCATTTCCACTATGTACTATCAATAGGTGCCGTATTCGCCATTATAGCAGCTTTCGTACACTGATTCCCCCTATTAACCGGATATACCCTACACAGCGCCTGAACAAAAATCCACTTTGCGGTTATGTTTATTGGGGTCAACCTCACATTCTTCCCACAACACTTCCTAGGCCTAGCAGGCATGCCACGACGATATTCTGACTATCCAGACGCCTACGCCCTGTGAAATACAGTATCATCTATTGGGTCACTAATCTCTTTAGTAGCAGTAATCATGTTCCTATTTATTCTATGAGAAGCCTTCGCCGCTAAACGGGAAGTACTATCCGTAGAACTAACAATAACAAATGTAGAATGACTTCACGGCTGCCCTCCCCCTTACCACACATACGAAGAACCAGCATTCGTACAAATTCAATCAAATTAA
>gi|1145139887|gb|KY319977.1| Poropuntius sp. Xe Pian voucher SUC8811 cytochrome c oxidase subunit I (COI) gene, complete cds; mitochondrial
GTGGCAATCACGCGCTGATTCTTCTCTACTAACCACAAAGACATTGGTACCCTTTATCTTGTATTTGGTGCCTGAGCCGGAATAGTAGGAACCGCCTTAAGCCTTCTTATTCGGGCTGAACTTAGCCAACCCGGATCACTTCTAGGTGATGACCAAATTTATAACGTCATCGTTACCGCCCACGCCTTTGTAATAATTTTCTTTATAGTAATGCCTATCCTCATTGGAGGATTTGGGAACTGACTCGTGCCACTAATAATCGGAGCCCCAGACATAGCATTTCCACGAATAAATAACATAAGCTTTTGACTACTGCCCCCATCATTTCTGCTATTATTAGCCTCCTCTGGTGTTGAAGCTGGAGCTGGAACAGGGTGAACAGTATACCCACCTCTTGCAGGAAATCTAGCCCATGCAGGAGCATCAGTAGACCTGACAATTTTCTCGCTCCACTTAGCAGGTGTGTCATCAATTTTAGGTGCAATTAATTTTATTACCACAACTATTAACATGAAACCTCCAGCCATCTCCCAATATCAAACACCACTATTTGTCTGATCCGTGCTTGTAACCGCTGTATTACTCCTCCTATCATTACCTGTTTTAGCTGCCGGAATTACAATACTACTAACAGACCGAAACCTTAATACCACTTTCTTTGACCCAGCAGGTGGAGGGGACCCAATCCTTTACCAACACCTATTCTGATTCTTTGGGCACCCGAAAGTTTATATTCTTATTCTCCCGGGATTCGGAATTATTTCCCACGTCGTAGCCTACTACTCAGGTAAAAAAGAACCATTTGGTTATATAGGAATAGTTTGAGCCATAATGGCCATCGGCCTTCTAGGATTTATCGTATGGGCCCACCACATATTCACTGTTGGAATAGACGTAGACACTCGTGCATACTTCACATCTGCGACAATAATTATTGCAATTCCAACAGGTGTAAAAGTATTCAGCTGACTAGCCACACTTCACGGAGGGTCTATTAAATGAGAAACACCTATGCTATGGGCCCTAGGATTTATTTTCCTGTTCACAGTAGGTGGTTTAACAGGAATCGTCCTATCCAACTCATCACTAGACATTGTCCTTCATGACACCTATTATGTAGTTGCGCATTTCCACTATGTACTATCAATAGGTGCCGTATTCGCCATTATAGCAGCTTTCGTACACTGATTCCCCCTATTAACCGGATATACCCTACACAGCGCCTGAACAAAAATCCACTTTGCGGTTATGTTTATTGGGGTCAACCTCACATTCTTCCCACAACACTTCCTAGGCCTAGCAGGCATGCCACGACGATATTCTGACTATCCAGACGCCTACGCCCTGTGAAATACAGTATCATCTATTGGGTCACTAATCTCTTTAGTAGCAGTAATCATGTTCCTATTTATTCTATGAGAAGCCTTCGCCGCTAAACGGGAAGTACTATCCGTAGAACTAACAATAACAAATGTAGAATGACTTCACGGCTGCCCTCCCCCTTACCACACATACGAAGAACCAGCATTCGTACAAATTCAATCAAATTAA
>gi|1145139889|gb|KY319978.1| Poropuntius sp. Xe Pian voucher SUC8812 cytochrome c oxidase subunit I (COI) gene, complete cds; mitochondrial
GTGGCAATCACGCGCTGATTCTTCTCTACTAACCACAAAGACATTGGTACCCTTTATCTTGTATTTGGTGCCTGAGCCGGAATAGTAGGAACCGCCTTAAGCCTTCTTATTCGGGCTGAACTTAGCCAACCCGGATCACTTCTAGGTGATGACCAAATTTATAACGTCATCGTTACCGCCCACGCCTTTGTAATAATTTTCTTTATAGTAATGCCTATCCTCATTGGAGGATTTGGGAACTGACTCGTGCCACTAATAATCGGAGCCCCAGACATAGCATTTCCACGAATAAATAACATAAGCTTTTGACTACTGCCCCCATCATTTCTGCTATTATTAGCCTCCTCTGGTGTTGAAGCTGGAGCTGGAACAGGGTGAACAGTATACCCACCTCTTGCAGGAAATCTAGCCCATGCAGGAGCATCAGTAGACCTGACAATTTTCTCGCTCCACTTAGCAGGTGTGTCATCAATTTTAGGTGCAATTAATTTTATTACCACAACTATTAACATGAAACCTCCAGCCATCTCCCAATATCAAACACCACTATTTGTCTGATCCGTGCTTGTAACCGCTGTATTACTCCTCCTATCATTACCTGTTTTAGCTGCCGGAATTACAATACTACTAACAGACCGAAACCTTAATACCACTTTCTTTGACCCAGCAGGTGGAGGGGACCCAATCCTTTACCAACACCTATTCTGATTCTTTGGGCACCCGAAAGTTTATATTCTTATTCTCCCGGGATTCGGAATTATTTCCCACGTCGTAGCCTACTACTCAGGTAAAAAAGAACCATTTGGTTATATAGGAATAGTTTGAGCCATAATGGCCATCGGCCTTCTAGGATTTATCGTATGGGCCCACCACATATTCACTGTTGGAATAGACGTAGACACTCGTGCATACTTCACATCTGCGACAATAATTATTGCAATTCCAACAGGTGTAAAAGTATTCAGCTGACTAGCCACACTTCACGGAGGGTCTATTAAATGAGAAACACCTATGCTATGGGCCCTAGGATTTATTTTCCTGTTCACAGTAGGTGGTTTAACAGGAATCGTCCTATCCAACTCATCACTAGACATTGTCCTTCATGACACCTATTATGTAGTTGCGCATTTCCACTATGTACTATCAATAGGTGCCGTATTCGCCATTATAGCAGCTTTCGTACACTGATTCCCCCTATTAACCGGATATACCCTACACAGCGCCTGAACAAAAATCCACTTTGCGGTTATGTTTATTGGGGTCAACCTCACATTCTTCCCACAACACTTCCTAGGCCTAGCAGGCATGCCACGACGATATTCTGACTATCCAGACGCCTACGCCCTGTGAAATACAGTATCATCTATTGGGTCACTAATCTCTTTAGTAGCAGTAATCATGTTCCTATTTATTCTATGAGAAGCCTTCGCCGCTAAACGGGAAGTACTATCCGTAGAACTAACAATAACAAATGTAGAATGACTTCACGGCTGCCCTCCCCCTTACCACACATACGAAGAACCAGCATTCGTACAAATTCAATCAAATTAA
>gi|1145139891|gb|KY319979.1| Poropuntius normani voucher SUC0325.11 cytochrome c oxidase subunit I (COI) gene, complete cds; mitochondrial
GTGGCAATCACGCGCTGATTCTTCTCTACTAACCACAAAGACATTGGTACCCTTTATCTTGTATTTGGTGCCTGAGCCGGAATAGTAGGAACCGCCTTAAGCCTTCTTATTCGGGCTGAACTTAGCCAACCCGGATCACTTCTAGGTGATGACCAAATTTATAACGTCATCGTTACCGCCCACGCCTTTGTAATAATTTTCTTTATAGTAATGCCTATCCTCATTGGAGGATTTGGGAACTGACTCGTGCCACTAATAATCGGAGCCCCAGACATAGCATTTCCACGAATAAATAACATAAGCTTTTGACTACTGCCCCCATCATTTCTGCTATTATTAGCCTCCTCTGGTGTTGAAGCTGGAGCTGGAACAGGGTGAACAGTATACCCACCTCTTGCAGGAAATCTGGCCCATGCAGGAGCATCAGTAGACCTGACAATTTTCTCGCTCCACTTAGCAGGTGTGTCATCAATTTTAGGTGCAATTAATTTTATTACCACAACTATTAACATGAAACCCCCAGCCATCTCCCAATATCAAACACCACTATTTGTCTGATCCGTGCTTGTAACCGCTGTATTACTCCTCCTATCATTACCTGTTTTAGCTGCCGGAATTACAATACTACTAACAGACCGAAACCTTAATACCACTTTCTTTGACCCAGCAGGTGGAGGAGACCCAATCCTTTACCAACACCTATTCTGATTCTTTGGGCACCCGGAAGTCTATATTCTTATTCTCCCGGGATTCGGAATTATTTCCCACGTCGTAGCCTACTACTCAGGTAAAAAAGAACCATTTGGTTATATAGGAATAGTTTGAGCCATAATGGCCATCGGCCTTCTAGGATTTATCGTATGGGCCCACCACATATTCACTGTTGGAATAGACGTAGACACTCGTGCATACTTCACATCTGCGACAATAATTATTGCAATTCCAACAGGTGTAAAAGTATTCAGCTGACTAGCCACACTTCACGGAGGGTCTATTAAATGAGAAACACCTATGCTATGGGCCCTAGGATTTATTTTCCTGTTCACAGTAGGTGGTTTAACAGGAATCGTCCTATCCAACTCATCACTAGACATTGTCCTTCATGACACCTATTATGTAGTTGCGCATTTCCACTATGTACTATCAATAGGTGCCGTATTCGCCATTATAGCAGCTTTCGTACACTGATTCCCCCTATTAACCGGATATACCCTACACAGCGCCTGAACAAAAATCCACTTTGCGGTTATGTTTATTGGGGTCAACCTCACATTCTTCCCACAACACTTCCTAGGCCTAGCAGGCATGCCACGACGATATTCTGACTATCCAGACGCCTACGCCCTGTGAAATACAGTATCATCTATTGGGTCACTAATCTCTTTAGTAGCAGTAATCATGTTCCTATTTATTCTATGAGAAGCCTTCGCCGCTAAACGGGAAGTATTATCCGTAGAACTAACAATAACAAATGTAGAATGACTTCACGGCTGCCCTCCCCCTTACCACACATACGAAGAACCAGCATTCGTACAAATTCAATCAAATTAA
>gi|1145139893|gb|KY319980.1| Poropuntius normani voucher SUC0325.12 cytochrome c oxidase subunit I (COI) gene, complete cds; mitochondrial
GTGGCAATCACGCGCTGATTCTTCTCTACTAACCACAAAGACATTGGTACCCTTTATCTTGTATTTGGTGCCTGAGCCGGAATAGTAGGAACCGCCTTAAGCCTTCTTATTCGGGCTGAACTTAGCCAACCCGGATCACTTCTAGGTGATGACCAAATTTATAACGTCATCGTTACCGCCCACGCCTTTGTAATAATTTTCTTTATAGTAATGCCTATCCTCATTGGAGGATTTGGGAACTGACTCGTGCCACTAATAATCGGAGCCCCAGACATAGCATTTCCACGAATAAATAACATAAGCTTTTGACTACTGCCCCCATCATTTCTGCTATTATTAGCCTCCTCTGGTGTTGAAGCTGGAGCTGGAACAGGGTGAACAGTATACCCACCTCTTGCAGGAAATCTGGCCCATGCAGGAGCATCAGTAGACCTGACAATTTTCTCGCTCCACTTAGCAGGTGTGTCATCAATTTTAGGTGCAATTAATTTTATTACCACAACTATTAACATGAAACCTCCAGCCATCTCCCAATATCAAACACCACTATTTGTCTGATCCGTGCTTGTAACCGCTGTATTACTCCTCCTATCATTACCTGTTTTAGCTGCCGGAATTACAATACTACTAACAGACCGAAACCTTAATACCACTTTCTTTGACCCAGCAGGTGGAGGAGACCCAATCCTTTACCAACACCTATTCTGATTCTTTGGGCACCCGGAAGTCTATATTCTTATTCTCCCGGGATTCGGAATTATTTCCCACGTCGTAGCCTACTACTCAGGTAAAAAAGAACCATTTGGTTATATAGGAATAGTTTGAGCCATAATGGCCATCGGCCTTCTAGGATTTATCGTATGGGCCCACCACATATTCACTGTTGGAATAGACGTAGACACTCGTGCATACTTCACATCTGCGACAATAATTATTGCAATTCCAACAGGTGTAAAAGTATTCAGCTGACTAGCCACACTTCACGGAGGGTCTATTAAATGAGAAACACCTATGCTATGGGCCCTAGGATTTATTTTCCTGTTCACAGTAGGTGGTTTAACAGGAATCGTCCTATCCAACTCATCACTAGACATTGTCCTTCATGACACCTATTATGTAGTTGCGCATTTCCACTATGTACTATCAATAGGTGCCGTATTCGCCATTATAGCAGCTTTCGTACACTGATTCCCCCTATTAACCGGATATACCCTACACAGCGCCTGAACAAAAATCCACTTTGCGGTTATGTTTATTGGGGTCAACCTCACATTCTTCCCACAACACTTCCTAGGCCTAGCAGGCATGCCACGACGATATTCTGACTACCCAGACGCCTACGCCCTGTGAAATACAGTATCATCTATTGGGTCACTAATCTCTTTAGTAGCAGTAATCATGTTCCTATTTATTCTATGAGAAGCCTTCGCCGCTAAACGGGAAGTACTATCCGTAGAACTAACAATAACAAATGTAGAATGACTTCACGGCTGCCCTCCCCCTTACCACACATACGAAGAACCAGCATTCGTACAAATTCAATCAAATTAA
>gi|1145139895|gb|KY319981.1| Poropuntius normani voucher SUC0325.13 cytochrome c oxidase subunit I (COI) gene, complete cds; mitochondrial
GTGGCAATCACGCGCTGATTCTTCTCTACTAACCACAAAGACATTGGTACCCTTTATCTTGTATTTGGTGCCTGAGCCGGAATAGTAGGAACCGCCTTAAGCCTTCTTATTCGGGCTGAACTTAGCCAACCCGGATCACTTCTAGGTGATGACCAAATTTATAACGTCATCGTTACCGCCCACGCCTTTGTAATAATTTTCTTTATAGTAATGCCTATCCTCATTGGAGGATTTGGGAACTGACTCGTGCCACTAATAATCGGAGCCCCAGACATAGCATTTCCACGAATAAATAACATAAGCTTTTGACTACTGCCCCCATCATTTCTGCTATTATTAGCCTCCTCTGGTGTTGAAGCTGGAGCTGGAACAGGGTGAACAGTATACCCACCTCTTGCAGGAAATCTGGCCCATGCAGGAGCATCAGTAGACCTGACAATTTTCTCGCTCCACTTAGCAGGTGTGTCATCAATTTTAGGTGCAATTAATTTTATTACCACAACTATTAACATGAAACCTCCAGCCATCTCCCAATATCAAACACCACTATTTGTCTGATCCGTGCTTGTAACCGCTGTATTACTCCTCCTATCATTACCTGTTTTAGCTGCCGGAATTACAATACTACTAACAGACCGAAACCTTAATACCACTTTCTTTGACCCAGCAGGTGGAGGAGACCCAATCCTTTACCAACACCTATTCTGATTCTTTGGGCACCCGGAAGTCTATATTCTTATTCTCCCGGGATTCGGAATTATTTCCCACGTCGTAGCCTACTACTCAGGTAAAAAAGAACCATTTGGTTATATAGGAATAGTTTGAGCCATAATGGCCATCGGCCTTCTAGGATTTATCGTATGGGCCCACCACATATTCACTGTTGGAATAGACGTAGACACTCGTGCATACTTCACATCTGCGACAATAATTATTGCAATTCCAACAGGTGTAAAAGTATTCAGCTGACTAGCCACACTTCACGGAGGGTCTATTAAATGAGAAACACCTATGCTATGGGCCCTAGGATTTATTTTCCTGTTCACAGTAGGTGGTTTAACAGGAATCGTCCTATCCAACTCATCACTAGACATTGTCCTTCATGACACCTATTATGTAGTTGCGCATTTCCACTATGTACTATCAATAGGTGCCGTATTCGCCATTATAGCAGCTTTCGTACACTGATTCCCCCTATTAACCGGATATACCCTACACAGCGCCTGAACAAAAATCCACTTTGCGGTTATGTTTATTGGGGTCAACCTCACATTCTTCCCACAACACTTCCTAGGCCTAGCAGGCATGCCACGACGATATTCTGACTACCCAGACGCCTACGCCCTGTGAAATACAGTATCATCTATTGGGTCACTAATCTCTTTAGTAGCAGTAATCATGTTCCTATTTATTCTATGAGAAGCCTTCGCCGCTAAACGGGAAGTACTATCCGTAGAACTAACAATAACAAATGTAGAATGACTTCACGGCTGCCCTCCCCCTTACCACACATACGAAGAACCAGCATTCGTACAAATTCAATCAAATTAA
>gi|1145139897|gb|KY319982.1| Poropuntius normani voucher SUC0325.14 cytochrome c oxidase subunit I (COI) gene, complete cds; mitochondrial
GTGGCAATCACGCGCTGATTCTTCTCTACTAACCACAAAGACATTGGTACCCTTTATCTTGTATTTGGTGCCTGAGCCGGAATAGTAGGAACCGCCTTAAGCCTTCTTATTCGGGCTGAACTTAGCCAACCCGGATCACTTCTAGGTGATGACCAAATTTATAACGTCATCGTTACCGCCCACGCCTTTGTAATAATTTTCTTTATAGTAATGCCTATCCTCATTGGAGGATTTGGGAACTGACTCGTGCCACTAATAATCGGAGCCCCAGACATAGCATTTCCACGAATAAATAACATAAGCTTTTGACTACTGCCCCCATCATTTCTGCTATTATTAGCCTCCTCTGGTGTTGAAGCTGGAGCTGGAACAGGGTGAACAGTATACCCACCTCTTGCAGGAAATCTGGCCCATGCAGGAGCATCAGTAGACCTGACAATTTTCTCGCTCCACTTAGCAGGTGTGTCATCAATTTTAGGTGCAATTAATTTTATTACCACAACTATTAACATGAAACCCCCAGCCATCTCCCAATATCAAACACCACTATTTGTCTGATCCGTGCTTGTAACCGCTGTATTACTCCTCCTATCATTACCTGTTTTAGCTGCCGGAATTACAATACTACTAACAGACCGAAACCTTAATACCACTTTCTTTGACCCAGCAGGTGGAGGAGACCCAATCCTTTACCAACACCTATTCTGATTCTTTGGGCACCCGGAAGTCTATATTCTTATTCTCCCGGGATTCGGAATTATTTCCCACGTCGTAGCCTACTACTCAGGTAAAAAAGAACCATTTGGTTATATAGGAATAGTTTGAGCCATAATGGCCATCGGCCTTCTAGGATTTATCGTATGGGCCCACCACATATTCACTGTTGGAATAGACGTAGACACTCGTGCATACTTCACATCTGCGACAATAATTATTGCAATTCCAACAGGTGTAAAAGTATTCAGCTGACTAGCCACACTTCACGGAGGGTCTATTAAATGAGAAACACCTATGCTATGGGCCCTAGGATTTATTTTCCTGTTCACAGTAGGTGGTTTAACAGGAATCGTCCTATCCAACTCATCACTAGACATTGTCCTTCATGACACCTATTATGTAGTTGCGCATTTCCACTATGTACTATCAATAGGTGCCGTATTCGCCATTATAGCAGCTTTCGTACACTGATTCCCCCTATTAACCGGATATACCCTACACAGCGCCTGAACAAAAATCCACTTTGCGGTTATGTTTATTGGGGTCAACCTCACATTCTTCCCACAACACTTCCTAGGCCTAGCAGGCATGCCACGACGATATTCTGACTATCCAGACGCCTACGCCCTGTGAAATACAGTATCATCTATTGGGTCACTAATCTCTTTAGTAGCAGTAATCATGTTCCTATTTATTCTATGAGAAGCCTTCGCCGCTAAACGGGAAGTATTATCCGTAGAACTAACAATAACAAATGTAGAATGACTTCACGGCTGCCCTCCCCCTTACCACACATACGAAGAACCAGCATTCGTACAAATTCAATCAAATTAA
>gi|1145139899|gb|KY319983.1| Poropuntius normani voucher SUC0325.15 cytochrome c oxidase subunit I (COI) gene, complete cds; mitochondrial
GTGGCAATCACGCGCTGATTCTTCTCTACTAACCACAAAGACATTGGTACCCTTTATCTTGTATTTGGTGCCTGAGCCGGAATAGTAGGAACCGCCTTAAGCCTTCTTATTCGGGCTGAACTTAGCCAACCCGGATCACTTCTAGGTGATGACCAAATTTATAATGTCATCGTTACCGCCCACGCCTTTGTAATAATTTTCTTTATAGTAATGCCTATCCTCATTGGAGGATTTGGGAACTGACTCGTGCCACTAATAATCGGAGCCCCAGACATAGCATTTCCACGAATAAATAACATAAGCTTTTGACTACTGCCCCCATCATTTCTGCTATTATTAGCCTCCTCTGGTGTTGAAGCTGGAGCTGGAACAGGGTGAACAGTATACCCACCTCTTGCAGGAAATCTGGCCCATGCAGGAGCATCAGTAGACCTGACAATTTTCTCGCTCCACTTAGCAGGTGTGTCATCAATTTTAGGTGCAATTAATTTTATTACCACAACTATTAACATGAAACCCCCAGCCATCTCCCAATATCAAACACCACTATTTGTCTGATCCGTGCTTGTAACCGCTGTATTACTCCTCCTATCATTACCTGTTTTAGCTGCCGGAATTACAATACTACTAACAGACCGAAACCTTAATACCACTTTCTTTGACCCAGCAGGTGGAGGAGACCCAATCCTTTACCAACACCTATTCTGATTCTTTGGGCACCCGGAAGTCTATATTCTTATTCTCCCGGGATTCGGAATTATTTCCCACGTCGTAGCCTACTACTCAGGTAAAAAAGAACCATTTGGTTATATAGGAATAGTTTGAGCCATAATGGCCATCGGCCTTCTAGGATTTATCGTATGGGCCCACCACATATTCACTGTTGGAATAGACGTAGACACTCGTGCATACTTCACATCTGCGACAATAATTATTGCAATTCCAACAGGTGTAAAAGTATTCAGCTGACTAGCCACACTTCACGGAGGGTCTATTAAATGAGAAACACCTATGCTATGGGCCCTAGGATTTATTTTCCTGTTCACAGTAGGTGGTTTAACAGGAATCGTCCTATCCAACTCATCACTAGACATTGTCCTTCATGACACCTATTATGTAGTTGCGCATTTCCACTATGTACTATCAATAGGTGCCGTATTCGCCATTATAGCAGCTTTCGTACACTGATTCCCCCTATTAACCGGATATACCCTACACAGCGCCTGAACAAAAATCCACTTTGCGGTTATGTTTATTGGGGTCAACCTCACATTCTTCCCACAACACTTCCTAGGCCTAGCAGGCATGCCACGACGATATTCTGACTACCCAGACGCCTACGCCCTGTGAAATACAGTATCATCTATTGGGTCACTAATCTCTTTAGTAGCAGTAATCATGTTCCTATTTATTCTATGAGAAGCCTTCGCCGCTAAACGGGAAGTACTATCCGTAGAACTAACAATAACAAATGTAGAATGACTTCACGGCTGCCCTCCCCCTTACCACACATACGAAGAACCAGCATTCGTACAAATTCAATCAAATTAA
>gi|1145139901|gb|KY319984.1| Poropuntius normani voucher SUC8707 cytochrome c oxidase subunit I (COI) gene, complete cds; mitochondrial
GTGGCAATCACGCGCTGATTCTTCTCTACTAACCACAAAGACATTGGTACCCTTTATCTTGTATTTGGTGCCTGAGCCGGAATAGTAGGAACCGCCTTAAGCCTTCTTATTCGGGCTGAACTTAGCCAACCCGGATCACTTCTAGGTGATGACCAAATTTATAACGTCATCGTTACCGCCCACGCCTTTGTAATAATTTTCTTTATAGTAATGCCCATTCTCATTGGAGGATTTGGGAACTGACTCGTACCACTAATAATCGGAGCCCCAGACATAGCATTTCCACGAATAAATAACATAAGCTTTTGACTACTGCCCCCATCATTTCTGCTATTATTAGCCTCCTCTGGTGTTGAAGCTGGGGCTGGAACAGGGTGAACAGTATACCCACCTCTTGCAGGAAATCTAGCCCACGCAGGAGCATCAGTAGACCTGACAATTTTCTCGCTCCACTTAGCAGGTGTGTCATCAATTTTAGGTGCAATTAATTTTATTACCACAACTATTAACATGAAACCCCCAGCCATCTCCCAATATCAAACACCACTATTTGTCTGATCCGTGCTTGTAACCGCTGTATTACTCCTCCTATCATTACCTGTTTTAGCTGCCGGAATTACAATACTACTAACAGACCGAAACCTTAATACCACTTTCTTTGACCCAGCAGGTGGAGGGGACCCAATCCTTTACCAACACCTATTCTGATTCTTCGGGCACCCGAAAGTTTATATTCTTATTCTCCCGGGATTCGGAATTATTTCCCACGTCGTAGCCTACTACTCAGGTAAAAAAGAACCATTTGGTTATATAGGAATAGTTTGAGCCATAATGGCCATCGGCCTTCTAGGATTTATCGTATGGGCCCACCACATGTTCACTGTTGGAATAGACGTAGACACTCGTGCATACTTCACATCTGCGACAATAATTATTGCAATTCCAACAGGTGTAAAAGTATTCAGCTGACTAGCCACACTTCACGGAGGGTCTATTAAATGAGAAACACCTATGCTATGGGCCCTAGGATTTATTTTCCTGTTCACAGTAGGTGGTTTAACAGGAATTGTCCTATCCAACTCATCACTAGACATTGTCCTTCATGACACCTATTATGTAGTTGCGCATTTCCACTATGTACTATCAATAGGTGCCGTATTCGCCATTATAGCAGCTTTCGTACACTGATTCCCCCTATTAACCGGATATACCCTACACAGCGCCTGAACAAAAATCCACTTTGCGGTTATGTTTATTGGGGTCAACCTCACATTCTTCCCACAACACTTCCTAGGCCTAGCAGGCATGCCACGACGATATTCTGACTATCCAGACGCCTACGCCCTGTGAAACACAGTATCATCTATTGGGTCATTAATCTCTTTAGTAGCAGTAATCATGTTCCTATTTATTCTATGAGAAGCCTTCGCCGCTAAACGGGAAGTATTATCCGTAGAACTAACAATAACAAACGTAGAATGACTTCACGGCTGCCCTCCCCCTTACCACACATACGAAGAACCAGCATTCGTACAAATTCAATCAAATTAA
>gi|1145139903|gb|KY319985.1| Poropuntius normani voucher SUC8708 cytochrome c oxidase subunit I (COI) gene, complete cds; mitochondrial
GTGGCAATCACGCGCTGATTCTTCTCTACTAACCACAAAGACATTGGTACCCTTTATCTTGTATTTGGTGCCTGAGCCGGAATAGTAGGAACCGCCTTAAGCCTTCTTATTCGGGCTGAACTTAGCCAACCCGGATCACTTCTAGGTGATGACCAAATTTATAACGTCATCGTTACCGCCCACGCCTTTGTAATAATTTTCTTTATAGTAATGCCCATTCTCATTGGAGGATTTGGGAACTGACTCGTACCACTAATAATCGGAGCCCCAGACATAGCATTTCCACGAATAAATAACATAAGCTTTTGACTACTGCCCCCATCATTTCTGCTATTATTAGCCTCCTCTGGTGTTGAAGCTGGGGCTGGAACAGGGTGAACAGTATACCCACCTCTTGCAGGAAATCTAGCCCACGCAGGAGCATCAGTAGACCTGACAATTTTCTCGCTCCACTTAGCAGGTGTGTCATCAATTTTAGGTGCAATTAATTTTATTACCACAACTATTAACATGAAACCCCCAGCCATCTCCCAATATCAAACACCACTATTTGTCTGATCCGTGCTTGTAACCGCTGTATTACTCCTCCTATCATTACCTGTTTTAGCTGCCGGAATTACAATACTACTAACAGACCGAAACCTTAATACCACTTTCTTTGACCCAGCAGGTGGAGGGGACCCAATCCTTTACCAACACCTATTCTGATTCTTCGGGCACCCGAAAGTTTATATTCTTATTCTCCCGGGATTCGGAATTATTTCCCACGTCGTAGCCTACTACTCAGGTAAAAAAGAACCATTTGGTTATATAGGAATAGTTTGAGCCATAATGGCCATCGGCCTCCTAGGATTTATCGTATGGGCCCACCACATGTTCACTGTTGGAATAGACGTAGACACTCGTGCATACTTCACATCTGCGACAATAATTATTGCAATTCCAACAGGTGTAAAAGTATTCAGCTGACTAGCCACACTTCACGGAGGGTCTATTAAATGAGAAACACCTATGCTATGGGCCCTAGGATTTATTTTCCTGTTCACAGTAGGTGGTTTAACAGGAATTGTCCTATCCAACTCATCACTAGACATTGTCCTTCATGACACCTATTATGTAGTTGCGCATTTCCACTATGTACTATCAATAGGTGCCGTATTCGCCATTATAGCAGCTTTCGTACACTGATTCCCCCTATTAACCGGATATACCCTACACAGCGCCTGAACAAAAATCCACTTTGCGGTTATGTTTATTGGGGTCAACCTCACATTCTTCCCACAACACTTCCTAGGCCTAGCAGGCATGCCACGACGATATTCTGACTATCCAGACGCCTACGCCCTGTGAAACACAGTATCATCTATTGGGTCATTAATCTCTTTAGTAGCAGTAATCATGTTCCTATTTATTCTATGAGAAGCCTTCGCCGCTAAACGGGAAGTATTATCCGTAGAACTAACAATAACAAACGTAGAATGACTTCACGGCTGCCCTCCCCCTTACCACACATACGAAGAACCAGCATTCGTACAAATTCAATCAAATTAA
>gi|1145139905|gb|KY319986.1| Poropuntius normani voucher SUC8709 cytochrome c oxidase subunit I (COI) gene, complete cds; mitochondrial
GTGGCAATCACGCGCTGATTCTTCTCTACTAACCACAAAGACATTGGTACCCTTTATCTTGTATTTGGTGCCTGAGCCGGAATAGTAGGAACCGCCTTAAGCCTTCTTATTCGGGCTGAACTTAGCCAACCCGGATCACTTCTAGGTGATGACCAAATTTATAACGTCATCGTTACCGCCCACGCCTTTGTAATAATTTTCTTTATAGTAATGCCCATTCTCATTGGAGGATTTGGGAACTGACTCGTACCACTAATAATCGGAGCCCCAGACATAGCATTTCCACGAATAAATAACATAAGCTTTTGACTACTGCCCCCATCATTTCTGCTATTATTAGCCTCCTCTGGTGTTGAAGCTGGGGCTGGAACAGGGTGAACAGTATACCCACCTCTTGCAGGAAATCTAGCCCACGCAGGAGCATCAGTAGACCTGACAATTTTCTCGCTCCACTTAGCAGGTGTGTCATCAATTTTAGGTGCAATTAATTTTATTACCACAACTATTAACATGAAACCCCCAGCCATCTCCCAATATCAAACACCACTATTTGTCTGATCCGTGCTTGTAACCGCTGTATTACTCCTCCTATCATTACCTGTTTTAGCTGCCGGAATTACAATACTACTAACAGACCGAAACCTTAATACCACTTTCTTTGACCCAGCAGGTGGAGGGGACCCAATCCTTTACCAACACCTATTCTGATTCTTCGGGCACCCGAAAGTTTATATTCTTATTCTCCCGGGATTCGGAATTATTTCCCACGTCGTAGCCTACTACTCAGGTAAAAAAGAACCATTTGGTTATATAGGAATAGTTTGAGCCATAATGGCCATCGGCCTCCTAGGATTTATCGTATGGGCCCACCACATGTTCACTGTTGGAATAGACGTAGACACTCGTGCATACTTCACATCTGCGACAATAATTATTGCAATTCCAACAGGTGTAAAAGTATTCAGCTGACTAGCCACACTTCACGGAGGGTCTATTAAATGAGAAACACCTATGCTATGGGCCCTAGGATTTATTTTCCTGTTCACAGTAGGTGGTTTAACAGGAATTGTCCTATCCAACTCATCACTAGACATTGTCCTTCATGACACCTATTATGTAGTTGCGCATTTCCACTATGTACTATCAATAGGTGCCGTATTCGCCATTATAGCAGCTTTCGTACACTGATTCCCCCTATTAACCGGATATACCCTACACAGCGCCTGAACAAAAATCCACTTTGCGGTTATGTTTATTGGGGTCAACCTCACATTCTTCCCACAACACTTCCTAGGCCTAGCAGGCATGCCACGACGATATTCTGACTATCCAGACGCCTACGCCCTGTGAAACACAGTATCATCTATTGGGTCATTAATCTCTTTAGTAGCAGTAATCATGTTCCTATTTATTCTATGAGAAGCCTTCGCCGCTAAACGGGAAGTATTATCCGTAGAACTAACAATAACAAACGTAGAATGACTTCACGGCTGCCCTCCCCCTTACCACACATACGAAGAACCAGCATTCGTACAAATTCAATCAAATTAA
>gi|1145139907|gb|KY319987.1| Poropuntius normani voucher SUC8710 cytochrome c oxidase subunit I (COI) gene, complete cds; mitochondrial
GTGGCAATCACGCGCTGATTCTTCTCTACTAACCACAAAGACATTGGTACCCTTTATCTTGTATTTGGTGCCTGAGCCGGAATAGTAGGAACCGCCTTAAGCCTTCTTATTCGGGCTGAACTTAGCCAACCCGGATCACTTCTAGGTGATGACCAAATTTATAACGTCATCGTTACCGCCCACGCCTTTGTAATAATTTTCTTTATAGTAATGCCCATTCTCATTGGAGGATTTGGGAACTGACTCGTACCACTAATAATCGGAGCCCCAGACATAGCATTTCCACGAATAAATAACATAAGCTTTTGACTACTGCCCCCATCATTTCTGCTATTATTAGCCTCCTCTGGTGTTGAAGCTGGGGCTGGAACAGGGTGAACAGTATACCCACCTCTTGCAGGAAATCTAGCCCACGCAGGAGCATCAGTAGACCTGACAATTTTCTCGCTCCACTTAGCAGGTGTGTCATCAATTTTAGGTGCAATTAATTTTATTACCACAACTATTAACATGAAACCCCCAGCCATCTCCCAATATCAAACACCACTATTTGTCTGATCCGTGCTTGTAACCGCTGTATTACTCCTCCTATCATTACCTGTTTTAGCTGCCGGAATTACAATACTACTAACAGACCGAAACCTTAATACCACTTTCTTTGACCCAGCAGGTGGAGGGGACCCAATCCTTTACCAACACCTATTCTGATTCTTCGGGCACCCGAAAGTTTATATTCTTATTCTCCCGGGATTCGGAATTATTTCCCACGTCGTAGCCTACTACTCAGGTAAAAAAGAACCATTTGGTTATATAGGAATAGTTTGAGCCATAATGGCCATCGGCCTTCTAGGATTTATCGTATGGGCCCACCACATGTTCACTGTTGGAATAGACGTAGACACTCGTGCATACTTCACATCTGCGACAATAATTATTGCAATTCCAACAGGTGTAAAAGTATTCAGCTGACTAGCCACACTTCACGGAGGGTCTATTAAATGAGAAACACCTATGCTATGGGCCCTAGGATTTATTTTCCTGTTCACAGTAGGTGGTTTAACAGGAATTGTCCTATCCAACTCATCACTAGACATTGTCCTTCATGACACCTATTATGTAGTTGCGCATTTCCACTATGTACTATCAATAGGTGCCGTATTCGCCATTATAGCAGCTTTCGTACACTGATTCCCCCTATTAACCGGATATACCCTACACAGCGCCTGAACAAAAATCCACTTTGCGGTTATGTTTATTGGGGTCAACCTCACATTCTTCCCACAACACTTCCTAGGCCTAGCAGGCATGCCACGACGATATTCTGACTATCCAGACGCCTACGCCCTGTGAAACACAGTATCATCTATTGGGTCATTAATCTCTTTAGTAGCAGTAATCATGTTCCTATTTATTCTATGAGAAGCCTTCGCCGCTAAACGGGAAGTATTATCCGTAGAACTAACAATAACAAACGTAGAATGACTTCACGGCTGCCCTCCCCCTTACCACACATACGAAGAACCAGCATTCGTACAAATTCAATCAAATTAA
>gi|1145139909|gb|KY319988.1| Poropuntius normani voucher SUC8711 cytochrome c oxidase subunit I (COI) gene, complete cds; mitochondrial
GTGGCAATCACGCGCTGATTCTTCTCTACTAACCACAAAGACATTGGTACCCTTTATCTTGTATTTGGTGCCTGAGCCGGAATAGTAGGAACCGCCTTAAGCCTTCTTATTCGGGCTGAACTTAGCCAACCCGGATCACTTCTAGGTGATGACCAAATTTATAACGTCATCGTTACCGCCCACGCCTTTGTAATAATTTTCTTTATAGTAATGCCCATTCTCATTGGAGGATTTGGGAACTGACTCGTACCACTAATAATCGGAGCCCCAGACATAGCATTTCCACGAATAAATAACATAAGCTTTTGACTACTGCCCCCATCATTTCTGCTATTATTAGCCTCCTCTGGTGTTGAAGCTGGGGCTGGAACAGGGTGAACAGTATACCCACCTCTTGCAGGAAATCTAGCCCACGCAGGAGCATCAGTAGACCTGACAATTTTCTCGCTCCACTTAGCAGGTGTGTCATCAATTTTAGGTGCAATTAATTTTATTACCACAACTATTAACATGAAACCCCCAGCCATCTCCCAATATCAAACACCACTATTTGTCTGATCCGTGCTTGTAACCGCTGTATTACTCCTCCTATCATTACCTGTTTTAGCTGCCGGAATTACAATACTACTAACAGACCGAAACCTTAATACCACTTTCTTTGACCCAGCAGGTGGAGGGGACCCAATCCTTTACCAACACCTATTCTGATTCTTCGGGCACCCGAAAGTTTATATTCTTATTCTCCCGGGATTCGGAATTATTTCCCACGTCGTAGCCTACTACTCAGGTAAAAAAGAACCATTTGGTTATATAGGAATAGTTTGAGCCATAATGGCCATCGGCCTTCTAGGATTTATCGTATGGGCCCACCACATGTTCACTGTTGGAATAGACGTAGACACTCGTGCATACTTCACATCTGCGACAATAATTATTGCAATTCCAACAGGTGTAAAAGTATTCAGCTGACTAGCCACACTTCACGGAGGGTCTATTAAATGAGAAACACCTATGCTATGGGCCCTAGGATTTATTTTCCTGTTCACAGTAGGTGGTTTAACAGGAATTGTCCTATCCAACTCATCACTAGACATTGTCCTTCATGACACCTATTATGTAGTTGCGCATTTCCACTATGTACTATCAATAGGTGCCGTATTCGCCATTATAGCAGCTTTCGTACACTGATTCCCCCTATTAACCGGATATACCCTACACAGCGCCTGAACAAAAATCCACTTTGCGGTTATGTTTATTGGGGTCAACCTCACATTCTTCCCACAACACTTCCTAGGCCTAGCAGGCATGCCACGACGATATTCTGACTATCCAGACGCCTACGCCCTGTGAAACACAGTATCATCTATTGGGTCATTAATCTCTTTAGTAGCAGTAATCATGTTCCTATTTATTCTATGAGAAGCCTTCGCCGCTAAACGGGAAGTATTATCCGTAGAACTAACAATAACAAACGTAGAATGACTTCACGGCTGCCCTCCCCCTTACCACACATACGAAGAACCAGCATTCGTACAAATTCAATCAAATTAA
>gi|1145139911|gb|KY319989.1| Poropuntius normani voucher SUC8712 cytochrome c oxidase subunit I (COI) gene, complete cds; mitochondrial
GTGGCAATCACGCGCTGATTCTTCTCTACTAACCACAAAGACATTGGTACCCTTTATCTTGTATTTGGTGCCTGAGCCGGAATAGTAGGAACCGCCTTAAGCCTTCTTATTCGGGCTGAACTTAGCCAACCCGGATCACTTCTAGGTGATGACCAAATTTATAACGTCATCGTTACCGCCCACGCCTTTGTAATAATTTTCTTTATAGTAATGCCCATTCTCATTGGAGGATTTGGGAACTGACTCGTACCACTAATAATCGGAGCCCCAGACATAGCATTTCCACGAATAAATAACATAAGCTTTTGACTACTGCCCCCATCATTTCTGCTATTATTAGCCTCCTCTGGTGTTGAAGCTGGGGCTGGAACAGGGTGAACAGTATACCCACCTCTTGCAGGAAATCTAGCCCACGCAGGAGCATCAGTAGACCTGACAATTTTCTCGCTCCACTTAGCAGGTGTGTCATCAATTTTAGGTGCAATTAATTTTATTACCACAACTATTAACATGAAACCCCCAGCCATCTCCCAATATCAAACACCACTATTTGTCTGATCCGTGCTTGTAACCGCTGTATTACTCCTCCTATCATTACCTGTTTTAGCTGCCGGAATTACAATACTACTAACAGACCGAAACCTTAATACCACTTTCTTTGACCCAGCAGGTGGAGGGGACCCAATCCTTTACCAACACCTATTCTGATTCTTCGGGCACCCGAAAGTTTATATTCTTATTCTCCCGGGATTCGGAATTATTTCCCACGTCGTAGCCTACTACTCAGGTAAAAAAGAACCATTTGGTTATATAGGAATAGTTTGAGCCATAATGGCCATCGGCCTTCTAGGATTTATCGTATGGGCCCACCACATGTTCACTGTTGGAATAGACGTAGACACTCGTGCATACTTCACATCTGCGACAATAATTATTGCAATTCCAACAGGTGTAAAAGTATTCAGCTGACTAGCCACACTTCACGGAGGGTCTATTAAATGAGAAACACCTATGCTATGGGCCCTAGGATTTATTTTCCTGTTCACAGTAGGTGGTTTAACAGGAATTGTCCTATCCAACTCATCACTAGACATTGTCCTTCATGACACCTATTATGTAGTTGCGCATTTCCACTATGTACTATCAATAGGTGCCGTATTCGCCATTATAGCAGCTTTCGTACACTGATTCCCCCTATTAACCGGATATACCCTACACAGCGCCTGAACAAAAATCCACTTTGCGGTTATGTTTATTGGGGTCAACCTCACATTCTTCCCACAACACTTCCTAGGCCTAGCAGGCATGCCACGACGATATTCTGACTATCCAGACGCCTACGCCCTGTGAAACACAGTATCATCTATTGGGTCATTAATCTCTTTAGTAGCAGTAATCATGTTCCTATTTATTCTATGAGAAGCCTTCGCCGCTAAACGGGAAGTATTATCCGTAGAACTAACAATAACAAACGTAGAATGACTTCACGGCTGCCCTCCCCCTTACCACACATACGAAGAACCAGCATTCGTACAAATTCAATCAAATTAA
>gi|1145139913|gb|KY319990.1| Poropuntius normani voucher SUC8713 cytochrome c oxidase subunit I (COI) gene, complete cds; mitochondrial
GTGGCAATCACGCGCTGATTCTTCTCTACTAACCACAAAGACATTGGTACCCTTTATCTTGTATTTGGTGCCTGAGCCGGAATAGTAGGAACCGCCTTAAGCCTTCTTATTCGGGCTGAACTTAGCCAACCCGGATCACTTCTAGGTGATGACCAAATTTATAACGTCATCGTTACCGCCCACGCCTTTGTAATAATTTTCTTTATAGTAATGCCCATTCTCATTGGAGGATTTGGGAACTGACTCGTACCACTAATAATCGGAGCCCCAGACATAGCATTTCCACGAATAAATAACATAAGCTTTTGACTACTGCCCCCATCATTTCTGCTATTATTAGCCTCCTCTGGTGTTGAAGCTGGGGCTGGAACAGGGTGAACAGTATACCCACCTCTTGCAGGAAATCTAGCCCACGCAGGAGCATCAGTAGACCTGACAATTTTCTCGCTCCACTTAGCAGGTGTGTCATCAATTTTAGGTGCAATTAATTTTATTACCACAACTATTAACATGAAACCCCCAGCCATCTCCCAATATCAAACACCACTATTTGTCTGATCCGTGCTTGTAACCGCTGTATTACTCCTCCTATCATTACCTGTTTTAGCTGCCGGAATTACAATACTACTAACAGACCGAAACCTTAATACCACTTTCTTTGACCCAGCAGGTGGAGGGGACCCAATCCTTTACCAACACCTATTCTGATTCTTCGGGCACCCGAAAGTTTATATTCTTATTCTCCCGGGATTCGGAATTATTTCCCACGTCGTAGCCTACTACTCAGGTAAAAAAGAACCATTTGGTTATATAGGAATAGTTTGAGCCATAATGGCCATCGGCCTTCTAGGATTTATCGTATGGGCCCACCACATGTTCACTGTTGGAATAGACGTAGACACTCGTGCATACTTCACATCTGCGACAATAATTATTGCAATTCCAACAGGTGTAAAAGTATTCAGCTGACTAGCCACACTTCACGGAGGGTCTATTAAATGAGAAACACCTATGCTATGGGCCCTAGGATTTATTTTCCTGTTCACAGTAGGTGGTTTAACAGGAATTGTCCTATCCAACTCATCACTAGACATTGTCCTTCATGACACCTATTATGTAGTTGCGCATTTCCACTATGTACTATCAATAGGTGCCGTATTCGCCATTATAGCAGCTTTCGTACACTGATTCCCCCTATTAACCGGATATACCCTACACAGCGCCTGAACAAAAATCCACTTTGCGGTTATGTTTATTGGGGTCAACCTCACATTCTTCCCACAACACTTCCTAGGCCTAGCAGGCATGCCACGACGATATTCTGACTATCCAGACGCCTACGCCCTGTGAAACACAGTATCATCTATTGGGTCATTAATCTCTTTAGTAGCAGTAATCATGTTCCTATTTATTCTATGAGAAGCCTTCGCCGCTAAACGGGAAGTATTATCCGTAGAACTAACAATAACAAACGTAGAATGACTTCACGGCTGCCCTCCCCCTTACCACACATACGAAGAACCAGCATTCGTACAAATTCAATCAAATTAA
>gi|1145139915|gb|KY319991.1| Poropuntius normani voucher SUC8714 cytochrome c oxidase subunit I (COI) gene, complete cds; mitochondrial
GTGGCAATCACGCGCTGATTCTTCTCTACTAACCACAAAGACATTGGTACCCTTTATCTTGTATTTGGTGCCTGAGCCGGAATAGTAGGAACCGCCTTAAGCCTTCTTATTCGGGCTGAACTTAGCCAACCCGGATCACTTCTAGGTGATGACCAAATTTATAACGTCATCGTTACCGCCCACGCCTTTGTAATAATTTTCTTTATAGTAATGCCCATTCTCATTGGAGGATTTGGGAACTGACTCGTACCACTAATAATCGGAGCCCCAGACATAGCATTTCCACGAATAAATAACATAAGCTTTTGACTACTGCCCCCATCATTTCTGCTATTATTAGCCTCCTCTGGTGTTGAAGCTGGGGCTGGAACAGGGTGAACAGTATACCCACCTCTTGCAGGAAATCTAGCCCACGCAGGAGCATCAGTAGACCTGACAATTTTCTCGCTCCACTTAGCAGGTGTGTCATCAATTTTAGGTGCAATTAATTTTATTACCACAACTATTAACATGAAACCCCCAGCCATCTCCCAATATCAAACACCACTATTTGTCTGATCCGTGCTTGTAACCGCTGTATTACTCCTCCTATCATTACCTGTTTTAGCTGCCGGAATTACAATACTACTAACAGACCGAAACCTTAATACCACTTTCTTTGACCCAGCAGGTGGAGGGGACCCAATCCTTTACCAACACCTATTCTGATTCTTCGGGCACCCGAAAGTTTATATTCTTATTCTCCCGGGATTCGGAATTATTTCCCACGTCGTAGCCTACTACTCAGGTAAAAAAGAACCATTTGGTTATATAGGAATAGTTTGAGCCATAATGGCCATCGGCCTTCTAGGATTTATCGTATGGGCCCACCACATGTTCACTGTTGGAATAGACGTAGACACTCGTGCATACTTCACATCTGCGACAATAATTATTGCAATTCCAACAGGTGTAAAAGTATTCAGCTGACTAGCCACACTTCACGGAGGGTCTATTAAATGAGAAACACCTATGCTATGGGCCCTAGGATTTATTTTCCTGTTCACAGTAGGTGGTTTAACAGGAATTGTCCTATCCAACTCATCACTAGACATTGTCCTTCATGACACCTATTATGTAGTTGCGCATTTCCACTATGTACTATCAATAGGTGCCGTATTCGCCATTATAGCAGCTTTCGTACACTGATTCCCCCTATTAACCGGATATACCCTACACAGCGCCTGAACAAAAATCCACTTTGCGGTTATGTTTATTGGGGTCAACCTCACATTCTTCCCACAACACTTCCTAGGCCTAGCAGGCATGCCACGACGATATTCTGACTATCCAGACGCCTACGCCCTGTGAAACACAGTATCATCTATTGGGTCATTAATCTCTTTAGTAGCAGTAATCATGTTCCTATTTATTCTATGAGAAGCCTTCGCCGCTAAACGGGAAGTATTATCCGTAGAACTAACAATAACAAACGTAGAATGACTTCACGGCTGCCCTCCCCCTTACCACACATACGAAGAACCAGCATTCGTACAAATTCAATCAAATTAA
>gi|1145139917|gb|KY319992.1| Poropuntius normani voucher SUC8715 cytochrome c oxidase subunit I (COI) gene, complete cds; mitochondrial
GTGGCAATCACGCGCTGATTCTTCTCTACTAACCACAAAGACATTGGTACCCTTTATCTTGTATTTGGTGCCTGAGCCGGAATAGTAGGAACCGCCTTAAGCCTTCTTATTCGGGCTGAACTTAGCCAACCCGGATCACTTCTAGGTGATGACCAAATTTATAACGTCATCGTTACCGCCCACGCCTTTGTAATAATTTTCTTTATAGTAATGCCCATTCTCATTGGAGGATTTGGGAACTGACTCGTACCACTAATAATCGGAGCCCCAGACATAGCATTTCCACGAATAAATAACATAAGCTTTTGACTACTGCCCCCATCATTTCTGCTATTATTAGCCTCCTCTGGTGTTGAAGCTGGGGCTGGAACAGGGTGAACAGTATACCCACCTCTTGCAGGAAATCTAGCCCACGCAGGAGCATCAGTAGACCTGACAATTTTCTCGCTCCACTTAGCAGGTGTGTCATCAATTTTAGGTGCAATTAATTTTATTACCACAACTATTAACATGAAACCCCCAGCCATCTCCCAATATCAAACACCACTATTTGTCTGATCCGTGCTTGTAACCGCTGTATTACTCCTCCTATCATTACCTGTTTTAGCTGCCGGAATTACAATACTACTAACAGACCGAAACCTTAATACCACTTTCTTTGACCCAGCAGGTGGAGGGGACCCAATCCTTTACCAACACCTATTCTGATTCTTCGGGCACCCGAAAGTTTATATTCTTATTCTCCCGGGATTCGGAATTATTTCCCACGTCGTAGCCTACTACTCAGGTAAAAAAGAACCATTTGGTTATATAGGAATAGTTTGAGCCATAATGGCCATCGGCCTTCTAGGATTTATCGTATGGGCCCACCACATGTTCACTGTTGGAATAGACGTAGACACTCGTGCATACTTCACATCTGCGACAATAATTATTGCAATTCCAACAGGTGTAAAAGTATTCAGCTGACTAGCCACACTTCACGGAGGGTCTATTAAATGAGAAACACCTATGCTATGGGCCCTAGGATTTATTTTCCTGTTCACAGTAGGTGGTTTAACAGGAATTGTCCTATCCAACTCATCACTAGACATTGTCCTTCATGACACCTATTATGTAGTTGCGCATTTCCACTATGTACTATCAATAGGTGCCGTATTCGCCATTATAGCAGCTTTCGTACACTGATTCCCCCTATTAACCGGATATACCCTACACAGCGCCTGAACAAAAATCCACTTTGCGGTTATGTTTATTGGGGTCAACCTCACATTCTTCCCACAACACTTCCTAGGCCTAGCAGGCATGCCACGACGATATTCTGACTATCCAGACGCCTACGCCCTGTGAAACACAGTATCATCTATTGGGTCATTAATCTCTTTAGTAGCAGTAATCATGTTCCTATTTATTCTATGAGAAGCCTTCGCCGCTAAACGGGAAGTATTATCCGTAGAACTAACAATAACAAACGTAGAATGACTTCACGGCTGCCCTCCCCCTTACCACACATACGAAGAACCAGCATTCGTACAAATTCAATCAAATTAA
>gi|1145139919|gb|KY319993.1| Poropuntius normani voucher SUC8716 cytochrome c oxidase subunit I (COI) gene, complete cds; mitochondrial
GTGGCAATCACGCGCTGATTCTTCTCTACTAACCACAAAGACATTGGTACCCTTTATCTTGTATTTGGTGCCTGAGCCGGAATAGTAGGAACCGCCTTAAGCCTTCTTATTCGGGCTGAACTTAGCCAACCCGGATCACTTCTAGGTGATGACCAAATTTATAACGTCATCGTTACCGCCCACGCCTTTGTAATAATTTTCTTTATAGTAATGCCCATTCTCATTGGAGGATTTGGGAACTGACTCGTACCACTAATAATCGGAGCCCCAGACATAGCATTTCCACGAATAAATAACATAAGCTTTTGACTACTGCCCCCATCATTTCTGCTATTATTAGCCTCCTCTGGTGTTGAAGCTGGGGCTGGAACAGGGTGAACAGTATACCCACCTCTTGCAGGAAATCTAGCCCACGCAGGAGCATCAGTAGACCTGACAATTTTCTCGCTCCACTTAGCAGGTGTGTCATCAATTTTAGGTGCAATTAATTTTATTACCACAACTATTAACATGAAACCCCCAGCCATCTCCCAATATCAAACACCACTATTTGTCTGATCCGTGCTTGTAACCGCTGTATTACTCCTCCTATCATTACCTGTTTTAGCTGCCGGAATTACAATACTACTAACAGACCGAAACCTTAATACCACTTTCTTTGACCCAGCAGGTGGAGGGGACCCAATCCTTTACCAACACCTATTCTGATTCTTCGGGCACCCGAAAGTTTATATTCTTATTCTCCCGGGATTCGGAATTATTTCCCACGTCGTAGCCTACTACTCAGGTAAAAAAGAACCATTTGGTTATATAGGAATAGTTTGAGCCATAATGGCCATCGGCCTTCTAGGATTTATCGTATGGGCCCACCACATGTTCACTGTTGGAATAGACGTAGACACTCGTGCATACTTCACATCTGCGACAATAATTATTGCAATTCCAACAGGTGTAAAAGTATTCAGCTGACTAGCCACACTTCACGGAGGGTCTATTAAATGAGAAACACCTATGCTATGGGCCCTAGGATTTATTTTCCTGTTCACAGTAGGTGGTTTAACAGGAATTGTCCTATCCAACTCATCACTAGACATTGTCCTTCATGACACCTATTATGTAGTTGCGCATTTCCACTATGTACTATCAATAGGTGCCGTATTCGCCATTATAGCAGCTTTCGTACACTGATTCCCCCTATTAACCGGATATACCCTACACAGCGCCTGAACAAAAATCCACTTTGCGGTTATGTTTATTGGGGTCAACCTCACATTCTTCCCACAACACTTCCTAGGCCTAGCAGGCATGCCACGACGATATTCTGACTATCCAGACGCCTACGCCCTGTGAAACACAGTATCATCTATTGGGTCATTAATCTCTTTAGTAGCAGTAATCATGTTCCTATTTATTCTATGAGAAGCCTTCGCCGCTAAACGGGAAGTATTATCCGTAGAACTAACAATAACAAACGTAGAATGACTTCACGGCTGCCCTCCCCCTTACCACACATACGAAGAACCAGCATTCGTACAAATTCAATCAAATTAA
>gi|1145139921|gb|KY319994.1| Poropuntius normani voucher SUC8717 cytochrome c oxidase subunit I (COI) gene, complete cds; mitochondrial
GTGGCAATCACGCGCTGATTCTTCTCTACTAACCACAAAGACATTGGTACCCTTTATCTTGTATTTGGTGCCTGAGCCGGAATAGTAGGAACCGCCTTAAGCCTTCTTATTCGGGCTGAACTTAGCCAACCCGGATCACTTCTAGGTGATGACCAAATTTATAACGTCATCGTTACCGCCCACGCCTTTGTAATAATTTTCTTTATAGTAATGCCCATTCTCATTGGAGGATTTGGGAACTGACTCGTACCACTAATAATCGGAGCCCCAGACATAGCATTTCCACGAATAAATAACATAAGCTTTTGACTACTGCCCCCATCATTTCTGCTATTATTAGCCTCCTCTGGTGTTGAAGCTGGGGCTGGAACAGGGTGAACAGTATACCCACCTCTTGCAGGAAATCTAGCCCACGCAGGAGCATCAGTAGACCTGACAATTTTCTCGCTCCACTTAGCAGGTGTGTCATCAATTTTAGGTGCAATTAATTTTATTACCACAACTATTAACATGAAACCCCCAGCCATCTCCCAATATCAAACACCACTATTTGTCTGATCCGTGCTTGTAACCGCTGTATTACTCCTCCTATCATTACCTGTTTTAGCTGCCGGAATTACAATACTACTAACAGACCGAAACCTTAATACCACTTTCTTTGACCCAGCAGGTGGAGGGGACCCAATCCTTTACCAACACCTATTCTGATTCTTCGGGCACCCGAAAGTTTATATTCTTATTCTCCCGGGATTCGGAATTATTTCCCACGTCGTAGCCTACTACTCAGGTAAAAAAGAACCATTTGGTTATATAGGAATAGTTTGAGCCATAATGGCCATCGGCCTTCTAGGATTTATCGTATGGGCCCACCACATGTTCACTGTTGGAATAGACGTAGACACTCGTGCATACTTCACATCTGCGACAATAATTATTGCAATTCCAACAGGTGTAAAAGTATTCAGCTGACTAGCCACACTTCACGGAGGGTCTATTAAATGAGAAACACCTATGCTATGGGCCCTAGGATTTATTTTCCTGTTCACAGTAGGTGGTTTAACAGGAATTGTCCTATCCAACTCATCACTAGACATTGTCCTTCATGACACCTATTATGTAGTTGCGCATTTCCACTATGTACTATCAATAGGTGCCGTATTCGCCATTATAGCAGCTTTCGTACACTGATTCCCCCTATTAACCGGATATACCCTACACAGCGCCTGAACAAAAATCCACTTTGCGGTTATGTTTATTGGGGTCAACCTCACATTCTTCCCACAACACTTCCTAGGCCTAGCAGGCATGCCACGACGATATTCTGACTATCCAGACGCCTACGCCCTGTGAAACACAGTATCATCTATTGGGTCATTAATCTCTTTAGTAGCAGTAATCATGTTCCTATTTATTCTATGAGAAGCCTTCGCCGCTAAACGGGAAGTATTATCCGTAGAACTAACAATAACAAACGTAGAATGACTTCACGGCTGCCCTCCCCCTTACCACACATACGAAGAACCAGCATTCGTACAAATTCAATCAAATTAA
>gi|1145139923|gb|KY319995.1| Poropuntius normani voucher SUC8718 cytochrome c oxidase subunit I (COI) gene, complete cds; mitochondrial
GTGGCAATCACGCGCTGATTCTTCTCTACTAACCACAAAGACATTGGTACCCTTTATCTTGTATTTGGTGCCTGAGCCGGAATAGTAGGAACCGCCTTAAGCCTTCTTATTCGGGCTGAACTTAGCCAACCCGGATCACTTCTAGGTGATGACCAAATTTATAACGTCATCGTTACCGCCCACGCCTTTGTAATAATTTTCTTTATAGTAATGCCCATTCTCATTGGAGGATTTGGGAACTGACTCGTACCACTAATAATCGGAGCCCCAGACATAGCATTTCCACGAATAAATAACATAAGCTTTTGACTACTGCCCCCATCATTTCTGCTATTATTAGCCTCCTCTGGTGTTGAAGCTGGGGCTGGAACAGGGTGAACAGTATACCCACCTCTTGCAGGAAATCTAGCCCACGCAGGAGCATCAGTAGACCTGACAATTTTCTCGCTCCACTTAGCAGGTGTGTCATCAATTTTAGGTGCAATTAATTTTATTACCACAACTATTAACATGAAACCCCCAGCCATCTCCCAATATCAAACACCACTATTTGTCTGATCCGTGCTTGTAACCGCTGTATTACTCCTCCTATCATTACCTGTTTTAGCTGCCGGAATTACAATACTACTAACAGACCGAAACCTTAATACCACTTTCTTTGACCCAGCAGGTGGAGGGGACCCAATCCTTTACCAACACCTATTCTGATTCTTCGGGCACCCGAAAGTTTATATTCTTATTCTCCCGGGATTCGGAATTATTTCCCACGTCGTAGCCTACTACTCAGGTAAAAAAGAACCATTTGGTTATATAGGAATAGTTTGAGCCATAATGGCCATCGGCCTTCTAGGATTTATCGTATGGGCCCACCACATGTTCACTGTTGGAATAGACGTAGACACTCGTGCATACTTCACATCTGCGACAATAATTATTGCAATTCCAACAGGTGTAAAAGTATTCAGCTGACTAGCCACACTTCACGGAGGGTCTATTAAATGAGAAACACCTATGCTATGGGCCCTAGGATTTATTTTCCTGTTCACAGTAGGTGGTTTAACAGGAATTGTCCTATCCAACTCATCACTAGACATTGTCCTTCATGACACCTATTATGTAGTTGCGCATTTCCACTATGTACTATCAATAGGTGCCGTATTCGCCATTATAGCAGCTTTCGTACACTGATTCCCCCTATTAACCGGATATACCCTACACAGCGCCTGAACAAAAATCCACTTTGCGGTTATGTTTATTGGGGTCAACCTCACATTCTTCCCACAACACTTCCTAGGCCTAGCAGGCATGCCACGACGATATTCTGACTATCCAGACGCCTACGCCCTGTGAAACACAGTATCATCTATTGGGTCATTAATCTCTTTAGTAGCAGTAATCATGTTCCTATTTATTCTATGAGAAGCCTTCGCCGCTAAACGGGAAGTATTATCCGTAGAACTAACAATAACAAACGTAGAATGACTTCACGGCTGCCCTCCCCCTTACCACACATACGAAGAACCAGCATTCGTACAAATTCAATCAAATTAA
>gi|1145139925|gb|KY319996.1| Poropuntius normani voucher SUC8719 cytochrome c oxidase subunit I (COI) gene, complete cds; mitochondrial
GTGGCAATCACGCGCTGATTCTTCTCTACTAACCACAAAGACATTGGTACCCTTTATCTTGTATTTGGTGCCTGAGCCGGAATAGTAGGAACCGCCTTAAGCCTTCTTATTCGGGCTGAACTTAGCCAACCCGGATCACTTCTAGGTGATGACCAAATTTATAACGTCATCGTTACCGCCCACGCCTTTGTAATAATTTTCTTTATAGTAATGCCCATTCTCATTGGAGGATTTGGGAACTGACTCGTACCACTAATAATCGGAGCCCCAGACATAGCATTTCCACGAATAAATAACATAAGCTTTTGACTACTGCCCCCATCATTTCTGCTATTATTAGCCTCCTCTGGTGTTGAAGCTGGGGCTGGAACAGGGTGAACAGTATACCCACCTCTTGCAGGAAATCTAGCCCACGCAGGAGCATCAGTAGACCTGACAATTTTCTCGCTCCACTTAGCAGGTGTGTCATCAATTTTAGGTGCAATTAATTTTATTACCACAACTATTAACATGAAACCCCCAGCCATCTCCCAATATCAAACACCACTATTTGTCTGATCCGTGCTTGTAACCGCTGTATTACTCCTCCTATCATTACCTGTTTTAGCTGCCGGAATTACAATACTACTAACAGACCGAAACCTTAATACCACTTTCTTTGACCCAGCAGGTGGAGGGGACCCAATCCTTTACCAACACCTATTCTGATTCTTCGGGCACCCGAAAGTTTATATTCTTATTCTCCCGGGATTCGGAATTATTTCCCACGTCGTAGCCTACTACTCAGGTAAAAAAGAACCATTTGGTTATATAGGAATAGTTTGAGCCATAATGGCCATCGGCCTTCTAGGATTTATCGTATGGGCCCACCACATGTTCACTGTTGGAATAGACGTAGACACTCGTGCATACTTCACATCTGCGACAATAATTATTGCAATTCCAACAGGTGTAAAAGTATTCAGCTGACTAGCCACACTTCACGGAGGGTCTATTAAATGAGAAACACCTATGCTATGGGCCCTAGGATTTATTTTCCTGTTCACAGTAGGTGGTTTAACAGGAATTGTCCTATCCAACTCATCACTAGACATTGTCCTTCATGACACCTATTATGTAGTTGCGCATTTCCACTATGTACTATCAATAGGTGCCGTATTCGCCATTATAGCAGCTTTCGTACACTGATTCCCCCTATTAACCGGATATACCCTACACAGCGCCTGAACAAAAATCCACTTTGCGGTTATGTTTATTGGGGTCAACCTCACATTCTTCCCACAACACTTCCTAGGCCTAGCAGGCATGCCACGACGATATTCTGACTATCCAGACGCCTACGCCCTGTGAAACACAGTATCATCTATTGGGTCATTAATCTCTTTAGTAGCAGTAATCATGTTCCTATTTATTCTATGAGAAGCCTTCGCCGCTAAACGGGAAGTATTATCCGTAGAACTAACAATAACAAACGTAGAATGACTTCACGGCTGCCCTCCCCCTTACCACACATACGAAGAACCAGCATTCGTACAAATTCAATCAAATTAA
>gi|1145139927|gb|KY319997.1| Poropuntius normani voucher SUC8720 cytochrome c oxidase subunit I (COI) gene, complete cds; mitochondrial
GTGGCAATCACGCGCTGATTCTTCTCTACTAACCACAAAGACATTGGTACCCTTTATCTTGTATTTGGTGCCTGAGCCGGAATAGTAGGAACCGCCTTAAGCCTTCTTATTCGGGCTGAACTTAGCCAACCCGGATCACTTCTAGGTGATGACCAAATTTATAACGTCATCGTTACCGCCCACGCCTTTGTAATAATTTTCTTTATAGTAATGCCCATTCTCATTGGAGGATTTGGGAACTGACTCGTACCACTAATAATCGGAGCCCCAGACATAGCATTTCCACGAATAAATAACATAAGCTTTTGACTACTGCCCCCATCATTTCTGCTATTATTAGCCTCCTCTGGTGTTGAAGCTGGGGCTGGAACAGGGTGAACAGTATACCCACCTCTTGCAGGAAATCTAGCCCACGCAGGAGCATCAGTAGACCTGACAATTTTCTCGCTCCACTTAGCAGGTGTGTCATCAATTTTAGGTGCAATTAATTTTATTACCACAACTATTAACATGAAACCCCCAGCCATCTCCCAATATCAAACACCACTATTTGTCTGATCCGTGCTTGTAACCGCTGTATTACTCCTCCTATCATTACCTGTTTTAGCTGCCGGAATTACAATACTACTAACAGACCGAAACCTTAATACCACTTTCTTTGACCCAGCAGGTGGAGGGGACCCAATCCTTTACCAACACCTATTCTGATTCTTCGGGCACCCGAAAGTTTATATTCTTATTCTCCCGGGATTCGGAATTATTTCCCACGTCGTAGCCTACTACTCAGGTAAAAAAGAACCATTTGGTTATATAGGAATAGTTTGAGCCATAATGGCCATCGGCCTTCTAGGATTTATCGTATGGGCCCACCACATGTTCACTGTTGGAATAGACGTAGACACTCGTGCATACTTCACATCTGCGACAATAATTATTGCAATTCCAACAGGTGTAAAAGTATTCAGCTGACTAGCCACACTTCACGGAGGGTCTATTAAATGAGAAACACCTATGCTATGGGCCCTAGGATTTATTTTCCTGTTCACAGTAGGTGGTTTAACAGGAATTGTCCTATCCAACTCATCACTAGACATTGTCCTTCATGACACCTATTATGTAGTTGCGCATTTCCACTATGTACTATCAATAGGTGCCGTATTCGCCATTATAGCAGCTTTCGTACACTGATTCCCCCTATTAACCGGATATACCCTACACAGCGCCTGAACAAAAATCCACTTTGCGGTTATGTTTATTGGGGTCAACCTCACATTCTTCCCACAACACTTCCTAGGCCTAGCAGGCATGCCACGACGATATTCTGACTATCCAGACGCCTACGCCCTGTGAAACACAGTATCATCTATTGGGTCATTAATCTCTTTAGTAGCAGTAATCATGTTCCTATTTATTCTATGAGAAGCCTTCGCCGCTAAACGGGAAGTATTATCCGTAGAACTAACAATAACAAACGTAGAATGACTTCACGGCTGCCCTCCCCCTTACCACACATACGAAGAACCAGCATTCGTACAAATTCAATCAAATTAA
>gi|1145139929|gb|KY319998.1| Poropuntius normani voucher SUC8721 cytochrome c oxidase subunit I (COI) gene, complete cds; mitochondrial
GTGGCAATCACGCGCTGATTCTTCTCTACTAACCACAAAGACATTGGTACCCTTTATCTTGTATTTGGTGCCTGAGCCGGAATAGTAGGAACCGCCTTAAGCCTTCTTATTCGGGCTGAACTTAGCCAACCCGGATCACTTCTAGGTGATGACCAAATTTATAACGTCATCGTTACCGCCCACGCCTTTGTAATAATTTTCTTTATAGTAATGCCCATTCTCATTGGAGGATTTGGGAACTGACTCGTACCACTAATAATCGGAGCCCCAGACATAGCATTTCCACGAATAAATAACATAAGCTTTTGACTACTGCCCCCATCATTTCTGCTATTATTAGCCTCCTCTGGTGTTGAAGCTGGGGCTGGAACAGGGTGAACAGTATACCCACCTCTTGCAGGAAATCTAGCCCACGCAGGAGCATCAGTAGACCTGACAATTTTCTCGCTCCACTTAGCAGGTGTGTCATCAATTTTAGGTGCAATTAATTTTATTACCACAACTATTAACATGAAACCCCCAGCCATCTCCCAATATCAAACACCACTATTTGTCTGATCCGTGCTTGTAACCGCTGTATTACTCCTCCTATCATTACCTGTTTTAGCTGCCGGAATTACAATACTACTAACAGACCGAAACCTTAATACCACTTTCTTTGACCCAGCAGGTGGAGGGGACCCAATCCTTTACCAACACCTATTCTGATTCTTCGGGCACCCGAAAGTTTATATTCTTATTCTCCCGGGATTCGGAATTATTTCCCACGTCGTAGCCTACTACTCAGGTAAAAAAGAACCATTTGGTTATATAGGAATAGTTTGAGCCATAATGGCCATCGGCCTTCTAGGATTTATCGTATGGGCCCACCACATGTTCACTGTTGGAATAGACGTAGACACTCGTGCATACTTCACATCTGCGACAATAATTATTGCAATTCCAACAGGTGTAAAAGTATTCAGCTGACTAGCCACACTTCACGGAGGGTCTATTAAATGAGAAACACCTATGCTATGGGCCCTAGGATTTATTTTCCTGTTCACAGTAGGTGGTTTAACAGGAATTGTCCTATCCAACTCATCACTAGACATTGTCCTTCATGACACCTATTATGTAGTTGCGCATTTCCACTATGTACTATCAATAGGTGCCGTATTCGCCATTATAGCAGCTTTCGTACACTGATTCCCCCTATTAACCGGATATACCCTACACAGCGCCTGAACAAAAATCCACTTTGCGGTTATGTTTATTGGGGTCAACCTCACATTCTTCCCACAACACTTCCTAGGCCTAGCAGGCATGCCACGACGATATTCTGACTATCCAGACGCCTACGCCCTGTGAAACACAGTATCATCTATTGGGTCATTAATCTCTTTAGTAGCAGTAATCATGTTCCTATTTATTCTATGAGAAGCCTTCGCCGCTAAACGGGAAGTATTATCCGTAGAACTAACAATAACAAACGTAGAATGACTTCACGGCTGCCCTCCCCCTTACCACACATACGAAGAACCAGCATTCGTACAAATTCAATCAAATTAA
>gi|1145139931|gb|KY319999.1| Poropuntius normani voucher SUC8722 cytochrome c oxidase subunit I (COI) gene, complete cds; mitochondrial
GTGGCAATCACGCGCTGATTCTTCTCTACTAACCACAAAGACATTGGTACCCTTTATCTTGTATTTGGTGCCTGAGCCGGAATAGTAGGAACCGCCTTAAGCCTTCTTATTCGGGCTGAACTTAGCCAACCCGGATCACTTCTAGGTGATGACCAAATTTATAACGTCATCGTTACCGCCCACGCCTTTGTAATAATTTTCTTTATAGTAATGCCCATTCTCATTGGAGGATTTGGGAACTGACTCGTACCACTAATAATCGGAGCCCCAGACATAGCATTTCCACGAATAAATAACATAAGCTTTTGACTACTGCCCCCATCATTTCTGCTATTATTAGCCTCCTCTGGTGTTGAAGCTGGGGCTGGAACAGGGTGAACAGTATACCCACCTCTTGCAGGAAATCTAGCCCACGCAGGAGCATCAGTAGACCTGACAATTTTCTCGCTCCACTTAGCAGGTGTGTCATCAATTTTAGGTGCAATTAATTTTATTACCACAACTATTAACATGAAACCCCCAGCCATCTCCCAATATCAAACACCACTATTTGTCTGATCCGTGCTTGTAACCGCTGTATTACTCCTCCTATCATTACCTGTTTTAGCTGCCGGAATTACAATACTACTAACAGACCGAAACCTTAATACCACTTTCTTTGACCCAGCAGGTGGAGGGGACCCAATCCTTTACCAACACCTATTCTGATTCTTCGGGCACCCGAAAGTTTATATTCTTATTCTCCCGGGATTCGGAATTATTTCCCACGTCGTAGCCTACTACTCAGGTAAAAAAGAACCATTTGGTTATATAGGAATAGTTTGAGCCATAATGGCCATCGGCCTTCTAGGATTTATCGTATGGGCCCACCACATGTTCACTGTTGGAATAGACGTAGACACTCGTGCATACTTCACATCTGCGACAATAATTATTGCAATTCCAACAGGTGTAAAAGTATTCAGCTGACTAGCCACACTTCACGGAGGGTCTATTAAATGAGAAACACCTATGCTATGGGCCCTAGGATTTATTTTCCTGTTCACAGTAGGTGGTTTAACAGGAATTGTCCTATCCAACTCATCACTAGACATTGTCCTTCATGACACCTATTATGTAGTTGCGCATTTCCACTATGTACTATCAATAGGTGCCGTATTCGCCATTATAGCAGCTTTCGTACACTGATTCCCCCTATTAACCGGATATACCCTACACAGCGCCTGAACAAAAATCCACTTTGCGGTTATGTTTATTGGGGTCAACCTCACATTCTTCCCACAACACTTCCTAGGCCTAGCAGGCATGCCACGACGATATTCTGACTATCCAGACGCCTACGCCCTGTGAAACACAGTATCATCTATTGGGTCATTAATCTCTTTAGTAGCAGTAATCATGTTCCTATTTATTCTATGAGAAGCCTTCGCCGCTAAACGGGAAGTATTATCCGTAGAACTAACAATAACAAACGTAGAATGACTTCACGGCTGCCCTCCCCCTTACCACACATACGAAGAACCAGCATTCGTACAAATTCAATCAAATTAA
>gi|1145139933|gb|KY320000.1| Poropuntius normani voucher SUC8723 cytochrome c oxidase subunit I (COI) gene, complete cds; mitochondrial
GTGGCAATCACGCGCTGATTCTTCTCTACTAACCACAAAGACATTGGTACCCTTTATCTTGTATTTGGTGCCTGAGCCGGAATAGTAGGAACCGCCTTAAGCCTTCTTATTCGGGCTGAACTTAGCCAACCCGGATCACTTCTAGGTGATGACCAAATTTATAACGTCATCGTTACCGCCCACGCCTTTGTAATAATTTTCTTTATAGTAATGCCCATTCTCATTGGAGGATTTGGGAACTGACTCGTACCACTAATAATCGGAGCCCCAGACATAGCATTTCCACGAATAAATAACATAAGCTTTTGACTACTGCCCCCATCATTTCTGCTATTATTAGCCTCCTCTGGTGTTGAAGCTGGGGCTGGAACAGGGTGAACAGTATACCCACCTCTTGCAGGAAATCTAGCCCACGCAGGAGCATCAGTAGACCTGACAATTTTCTCGCTCCACTTAGCAGGTGTGTCATCAATTTTAGGTGCAATTAATTTTATTACCACAACTATTAACATGAAACCCCCAGCCATCTCCCAATATCAAACACCACTATTTGTCTGATCCGTGCTTGTAACCGCTGTATTACTCCTCCTATCATTACCTGTTTTAGCTGCCGGAATTACAATACTACTAACAGACCGAAACCTTAATACCACTTTCTTTGACCCAGCAGGTGGAGGGGACCCAATCCTTTACCAACACCTATTCTGATTCTTCGGGCACCCGAAAGTTTATATTCTTATTCTCCCGGGATTCGGAATTATTTCCCACGTCGTAGCCTACTACTCAGGTAAAAAAGAACCATTTGGTTATATAGGAATAGTTTGAGCCATAATGGCCATCGGCCTTCTAGGATTTATCGTATGGGCCCACCACATGTTCACTGTTGGAATAGACGTAGACACTCGTGCATACTTCACATCTGCGACAATAATTATTGCAATTCCAACAGGTGTAAAAGTATTCAGCTGACTAGCCACACTTCACGGAGGGTCTATTAAATGAGAAACACCTATGCTATGGGCCCTAGGATTTATTTTCCTGTTCACAGTAGGTGGTTTAACAGGAATTGTCCTATCCAACTCATCACTAGACATTGTCCTTCATGACACCTATTATGTAGTTGCGCATTTCCACTATGTACTATCAATAGGTGCCGTATTCGCCATTATAGCAGCTTTCGTACACTGATTCCCCCTATTAACCGGATATACCCTACACAGCGCCTGAACAAAAATCCACTTTGCGGTTATGTTTATTGGGGTCAACCTCACATTCTTCCCACAACACTTCCTAGGCCTAGCAGGCATGCCACGACGATATTCTGACTATCCAGACGCCTACGCCCTGTGAAACACAGTATCATCTATTGGGTCATTAATCTCTTTAGTAGCAGTAATCATGTTCCTATTTATTCTATGAGAAGCCTTCGCCGCTAAACGGGAAGTATTATCCGTAGAACTAACAATAACAAACGTAGAATGACTTCACGGCTGCCCTCCCCCTTACCACACATACGAAGAACCAGCATTCGTACAAATTCAATCAAATTAA
>gi|1145139935|gb|KY320001.1| Poropuntius normani voucher SUC8724 cytochrome c oxidase subunit I (COI) gene, complete cds; mitochondrial
GTGGCAATCACGCGCTGATTCTTCTCTACTAACCACAAAGACATTGGTACCCTTTATCTTGTATTTGGTGCCTGAGCCGGAATAGTAGGAACCGCCTTAAGCCTTCTTATTCGGGCTGAACTTAGCCAACCCGGATCACTTCTAGGTGATGACCAAATTTATAACGTCATCGTTACCGCCCACGCCTTTGTAATAATTTTCTTTATAGTAATGCCCATTCTCATTGGAGGATTTGGGAACTGACTCGTACCACTAATAATCGGAGCCCCAGACATAGCATTTCCACGAATAAATAACATAAGCTTTTGACTACTGCCCCCATCATTTCTGCTATTATTAGCCTCCTCTGGTGTTGAAGCTGGGGCTGGAACAGGGTGAACAGTATACCCACCTCTTGCAGGAAATCTAGCCCACGCAGGAGCATCAGTAGACCTGACAATTTTCTCGCTCCACTTAGCAGGTGTGTCATCAATTTTAGGTGCAATTAATTTTATTACCACAACTATTAACATGAAACCCCCAGCCATCTCCCAATATCAAACACCACTATTTGTCTGATCCGTGCTTGTAACCGCTGTATTACTCCTCCTATCATTACCTGTTTTAGCTGCCGGAATTACAATACTACTAACAGACCGAAACCTTAATACCACTTTCTTTGACCCAGCAGGTGGAGGGGACCCAATCCTTTACCAACACCTATTCTGATTCTTCGGGCACCCGAAAGTTTATATTCTTATTCTCCCGGGATTCGGAATTATTTCCCACGTCGTAGCCTACTACTCAGGTAAAAAAGAACCATTTGGTTATATAGGAATAGTTTGAGCCATAATGGCCATCGGCCTTCTAGGATTTATCGTATGGGCCCACCACATGTTCACTGTTGGAATAGACGTAGACACTCGTGCATACTTCACATCTGCGACAATAATTATTGCAATTCCAACAGGTGTAAAAGTATTCAGCTGACTAGCCACACTTCACGGAGGGTCTATTAAATGAGAAACACCTATGCTATGGGCCCTAGGATTTATTTTCCTGTTCACAGTAGGTGGTTTAACAGGAATTGTCCTATCCAACTCATCACTAGACATTGTCCTTCATGACACCTATTATGTAGTTGCGCATTTCCACTATGTACTATCAATAGGTGCCGTATTCGCCATTATAGCAGCTTTCGTACACTGATTCCCCCTATTAACCGGATATACCCTACACAGCGCCTGAACAAAAATCCACTTTGCGGTTATGTTTATTGGGGTCAACCTCACATTCTTCCCACAACACTTCCTAGGCCTAGCAGGCATGCCACGACGATATTCTGACTATCCAGACGCCTACGCCCTGTGAAACACAGTATCATCTATTGGGTCATTAATCTCTTTAGTAGCAGTAATCATGTTCCTATTTATTCTATGAGAAGCCTTCGCCGCTAAACGGGAAGTATTATCCGTAGAACTAACAATAACAAACGTAGAATGACTTCACGGCTGCCCTCCCCCTTACCACACATACGAAGAACCAGCATTCGTACAAATTCAATCAAATTAA
>gi|1145139937|gb|KY320002.1| Poropuntius normani voucher SUC8725 cytochrome c oxidase subunit I (COI) gene, complete cds; mitochondrial
GTGGCAATCACGCGCTGATTCTTCTCTACTAACCACAAAGACATTGGTACCCTTTATCTTGTATTTGGTGCCTGAGCCGGAATAGTAGGAACCGCCTTAAGCCTTCTTATTCGGGCTGAACTTAGCCAACCCGGATCACTTCTAGGTGATGACCAAATTTATAACGTCATCGTTACCGCCCACGCCTTTGTAATAATTTTCTTTATAGTAATGCCCATTCTCATTGGAGGATTTGGGAACTGACTCGTACCACTAATAATCGGAGCCCCAGACATAGCATTTCCACGAATAAATAACATAAGCTTTTGACTACTGCCCCCATCATTTCTGCTATTATTAGCCTCCTCTGGTGTTGAAGCTGGGGCTGGAACAGGGTGAACAGTATACCCACCTCTTGCAGGAAATCTAGCCCACGCAGGAGCATCAGTAGACCTGACAATTTTCTCGCTCCACTTAGCAGGTGTGTCATCAATTTTAGGTGCAATTAATTTTATTACCACAACTATTAACATGAAACCCCCAGCCATCTCCCAATATCAAACACCACTATTTGTCTGATCCGTGCTTGTAACCGCTGTATTACTCCTCCTATCATTACCTGTTTTAGCTGCCGGAATTACAATACTACTAACAGACCGAAACCTTAATACCACTTTCTTTGACCCAGCAGGTGGAGGGGACCCAATCCTTTACCAACACCTATTCTGATTCTTCGGGCACCCGAAAGTTTATATTCTTATTCTCCCGGGATTCGGAATTATTTCCCACGTCGTAGCCTACTACTCAGGTAAAAAAGAACCATTTGGTTATATAGGAATAGTTTGAGCCATAATGGCCATCGGCCTTCTAGGATTTATCGTATGGGCCCACCACATGTTCACTGTTGGAATAGACGTAGACACTCGTGCATACTTCACATCTGCGACAATAATTATTGCAATTCCAACAGGTGTAAAAGTATTCAGCTGACTAGCCACACTTCACGGAGGGTCTATTAAATGAGAAACACCTATGCTATGGGCCCTAGGATTTATTTTCCTGTTCACAGTAGGTGGTTTAACAGGAATTGTCCTATCCAACTCATCACTAGACATTGTCCTTCATGACACCTATTATGTAGTTGCGCATTTCCACTATGTACTATCAATAGGTGCCGTATTCGCCATTATAGCAGCTTTCGTACACTGATTCCCCCTATTAACCGGATATACCCTACACAGCGCCTGAACAAAAATCCACTTTGCGGTTATGTTTATTGGGGTCAACCTCACATTCTTCCCACAACACTTCCTAGGCCTAGCAGGCATGCCACGACGATATTCTGACTATCCAGACGCCTACGCCCTGTGAAACACAGTATCATCTATTGGGTCATTAATCTCTTTAGTAGCAGTAATCATGTTCCTATTTATTCTATGAGAAGCCTTCGCCGCTAAACGGGAAGTATTATCCGTAGAACTAACAATAACAAACGTAGAATGACTTCACGGCTGCCCTCCCCCTTACCACACATACGAAGAACCAGCATTCGTACAAATTCAATCAAATTAA
>gi|1145139939|gb|KY320003.1| Poropuntius normani voucher SUC8726 cytochrome c oxidase subunit I (COI) gene, complete cds; mitochondrial
GTGGCAATCACGCGCTGATTCTTCTCTACTAACCACAAAGACATTGGTACCCTTTATCTTGTATTTGGTGCCTGAGCCGGAATAGTAGGAACCGCCTTAAGCCTTCTTATTCGGGCTGAACTTAGCCAACCCGGATCACTTCTAGGTGATGACCAAATTTATAACGTCATCGTTACCGCCCACGCCTTTGTAATAATTTTCTTTATAGTAATGCCCATTCTCATTGGAGGATTTGGGAACTGACTCGTACCACTAATAATCGGAGCCCCAGACATAGCATTTCCACGAATAAATAACATAAGCTTTTGACTACTGCCCCCATCATTTCTGCTATTATTAGCCTCCTCTGGTGTTGAAGCTGGGGCTGGAACAGGGTGAACAGTATACCCACCTCTTGCAGGAAATCTAGCCCACGCAGGAGCATCAGTAGACCTGACAATTTTCTCGCTCCACTTAGCAGGTGTGTCATCAATTTTAGGTGCAATTAATTTTATTACCACAACTATTAACATGAAACCCCCAGCCATCTCCCAATATCAAACACCACTATTTGTCTGATCCGTGCTTGTAACCGCTGTATTACTCCTCCTATCATTACCTGTTTTAGCTGCCGGAATTACAATACTACTAACAGACCGAAACCTTAATACCACTTTCTTTGACCCAGCAGGTGGAGGGGACCCAATCCTTTACCAACACCTATTCTGATTCTTCGGGCACCCGAAAGTTTATATTCTTATTCTCCCGGGATTCGGAATTATTTCCCACGTCGTAGCCTACTACTCAGGTAAAAAAGAACCATTTGGTTATATAGGAATAGTTTGAGCCATAATGGCCATCGGCCTTCTAGGATTTATCGTATGGGCCCACCACATGTTCACTGTTGGAATAGACGTAGACACTCGTGCATACTTCACATCTGCGACAATAATTATTGCAATTCCAACAGGTGTAAAAGTATTCAGCTGACTAGCCACACTTCACGGAGGGTCTATTAAATGAGAAACACCTATGCTATGGGCCCTAGGATTTATTTTCCTGTTCACAGTAGGTGGTTTAACAGGAATTGTCCTATCCAACTCATCACTAGACATTGTCCTTCATGACACCTATTATGTAGTTGCGCATTTCCACTATGTACTATCAATAGGTGCCGTATTCGCCATTATAGCAGCTTTCGTACACTGATTCCCCCTATTAACCGGATATACCCTACACAGCGCCTGAACAAAAATCCACTTTGCGGTTATGTTTATTGGGGTCAACCTCACATTCTTCCCACAACACTTCCTAGGCCTAGCAGGCATGCCACGACGATATTCTGACTATCCAGACGCCTACGCCCTGTGAAACACAGTATCATCTATTGGGTCATTAATCTCTTTAGTAGCAGTAATCATGTTCCTATTTATTCTATGAGAAGCCTTCGCCGCTAAACGGGAAGTATTATCCGTAGAACTAACAATAACAAACGTAGAATGACTTCACGGCTGCCCTCCCCCTTACCACACATACGAAGAACCAGCATTCGTACAAATTCAATCAAATTAA
>gi|1145139941|gb|KY320004.1| Poropuntius normani voucher SUC8727 cytochrome c oxidase subunit I (COI) gene, complete cds; mitochondrial
GTGGCAATCACGCGCTGATTCTTCTCTACTAACCACAAAGACATTGGTACCCTTTATCTTGTATTTGGTGCCTGAGCCGGAATAGTAGGAACCGCCTTAAGCCTTCTTATTCGGGCTGAACTTAGCCAACCCGGATCACTTCTAGGTGATGACCAAATTTATAACGTCATCGTTACCGCCCACGCCTTTGTAATAATTTTCTTTATAGTAATGCCCATTCTCATTGGAGGATTTGGGAACTGACTCGTACCACTAATAATCGGAGCCCCAGACATAGCATTTCCACGAATAAATAACATAAGCTTTTGACTACTGCCCCCATCATTTCTGCTATTATTAGCCTCCTCTGGTGTTGAAGCTGGGGCTGGAACAGGGTGAACAGTATACCCACCTCTTGCAGGAAATCTAGCCCACGCAGGAGCATCAGTAGACCTGACAATTTTCTCGCTCCACTTAGCAGGTGTGTCATCAATTTTAGGTGCAATTAATTTTATTACCACAACTATTAACATGAAACCCCCAGCCATCTCCCAATATCAAACACCACTATTTGTCTGATCCGTGCTTGTAACCGCTGTATTACTCCTCCTATCATTACCTGTTTTAGCTGCCGGAATTACAATACTACTAACAGACCGAAACCTTAATACCACTTTCTTTGACCCAGCAGGTGGAGGGGACCCAATCCTTTACCAACACCTATTCTGATTCTTCGGGCACCCGAAAGTTTATATTCTTATTCTCCCGGGATTCGGAATTATTTCCCACGTCGTAGCCTACTACTCAGGTAAAAAAGAACCATTTGGTTATATAGGAATAGTTTGAGCCATAATGGCCATCGGCCTTCTAGGATTTATCGTATGGGCCCACCACATGTTCACTGTTGGAATAGACGTAGACACTCGTGCATACTTCACATCTGCGACAATAATTATTGCAATTCCAACAGGTGTAAAAGTATTCAGCTGACTAGCCACACTTCACGGAGGGTCTATTAAATGAGAAACACCTATGCTATGGGCCCTAGGATTTATTTTCCTGTTCACAGTAGGTGGTTTAACAGGAATTGTCCTATCCAACTCATCACTAGACATTGTCCTTCATGACACCTATTATGTAGTTGCGCATTTCCACTATGTACTATCAATAGGTGCCGTATTCGCCATTATAGCAGCTTTCGTACACTGATTCCCCCTATTAACCGGATATACCCTACACAGCGCCTGAACAAAAATCCACTTTGCGGTTATGTTTATTGGGGTCAACCTCACATTCTTCCCACAACACTTCCTAGGCCTAGCAGGCATGCCACGACGATATTCTGACTATCCAGACGCCTACGCCCTGTGAAACACAGTATCATCTATTGGGTCATTAATCTCTTTAGTAGCAGTAATCATGTTCCTATTTATTCTATGAGAAGCCTTCGCCGCTAAACGGGAAGTATTATCCGTAGAACTAACAATAACAAACGTAGAATGACTTCACGGCTGCCCTCCCCCTTACCACACATACGAAGAACCAGCATTCGTACAAATTCAATCAAATTAA
>gi|1145139943|gb|KY320005.1| Poropuntius normani voucher SUC8728 cytochrome c oxidase subunit I (COI) gene, complete cds; mitochondrial
GTGGCAATCACGCGCTGATTCTTCTCTACTAACCACAAAGACATTGGTACCCTTTATCTTGTATTTGGTGCCTGAGCCGGAATAGTAGGAACCGCCTTAAGCCTTCTTATTCGGGCTGAACTTAGCCAACCCGGATCACTTCTAGGTGATGACCAAATTTATAACGTCATCGTTACCGCCCACGCCTTTGTAATAATTTTCTTTATAGTAATGCCCATTCTCATTGGAGGATTTGGGAACTGACTCGTACCACTAATAATCGGAGCCCCAGACATAGCATTTCCACGAATAAATAACATAAGCTTTTGACTACTGCCCCCATCATTTCTGCTATTATTAGCCTCCTCTGGTGTTGAAGCTGGGGCTGGAACAGGGTGAACAGTATACCCACCTCTTGCAGGAAATCTAGCCCACGCAGGAGCATCAGTAGACCTGACAATTTTCTCGCTCCACTTAGCAGGTGTGTCATCAATTTTAGGTGCAATTAATTTTATTACCACAACTATTAACATGAAACCCCCAGCCATCTCCCAATATCAAACACCACTATTTGTCTGATCCGTGCTTGTAACCGCTGTATTACTCCTCCTATCATTACCTGTTTTAGCTGCCGGAATTACAATACTACTAACAGACCGAAACCTTAATACCACTTTCTTTGACCCAGCAGGTGGAGGGGACCCAATCCTTTACCAACACCTATTCTGATTCTTCGGGCACCCGAAAGTTTATATTCTTATTCTCCCGGGATTCGGAATTATTTCCCACGTCGTAGCCTACTACTCAGGTAAAAAAGAACCATTTGGTTATATAGGAATAGTTTGAGCCATAATGGCCATCGGCCTTCTAGGATTTATCGTATGGGCCCACCACATGTTCACTGTTGGAATAGACGTAGACACTCGTGCATACTTCACATCTGCGACAATAATTATTGCAATTCCAACAGGTGTAAAAGTATTCAGCTGACTAGCCACACTTCACGGAGGGTCTATTAAATGAGAAACACCTATGCTATGGGCCCTAGGATTTATTTTCCTGTTCACAGTAGGTGGTTTAACAGGAATTGTCCTATCCAACTCATCACTAGACATTGTCCTTCATGACACCTATTATGTAGTTGCGCATTTCCACTATGTACTATCAATAGGTGCCGTATTCGCCATTATAGCAGCTTTCGTACACTGATTCCCCCTATTAACCGGATATACCCTACACAGCGCCTGAACAAAAATCCACTTTGCGGTTATGTTTATTGGGGTCAACCTCACATTCTTCCCACAACACTTCCTAGGCCTAGCAGGCATGCCACGACGATATTCTGACTATCCAGACGCCTACGCCCTGTGAAACACAGTATCATCTATTGGGTCATTAATCTCTTTAGTAGCAGTAATCATGTTCCTATTTATTCTATGAGAAGCCTTCGCCGCTAAACGGGAAGTATTATCCGTAGAACTAACAATAACAAACGTAGAATGACTTCACGGCTGCCCTCCCCCTTACCACACATACGAAGAACCAGCATTCGTACAAATTCAATCAAATTAA
>gi|1145139945|gb|KY320006.1| Poropuntius normani voucher SUC8729 cytochrome c oxidase subunit I (COI) gene, complete cds; mitochondrial
GTGGCAATCACGCGCTGATTCTTCTCTACTAACCACAAAGACATTGGTACCCTTTATCTTGTATTTGGTGCCTGAGCCGGAATAGTAGGAACCGCCTTAAGCCTTCTTATTCGGGCTGAACTTAGCCAACCCGGATCACTTCTAGGTGATGACCAAATTTATAACGTCATCGTTACCGCCCACGCCTTTGTAATAATTTTCTTTATAGTAATGCCCATTCTCATTGGAGGATTTGGGAACTGACTCGTACCACTAATAATCGGAGCCCCAGACATAGCATTTCCACGAATAAATAACATAAGCTTTTGACTACTGCCCCCATCATTTCTGCTATTATTAGCCTCCTCTGGTGTTGAAGCTGGGGCTGGAACAGGGTGAACAGTATACCCACCTCTTGCAGGAAATCTAGCCCACGCAGGAGCATCAGTAGACCTGACAATTTTCTCGCTCCACTTAGCAGGTGTGTCATCAATTTTAGGTGCAATTAATTTTATTACCACAACTATTAACATGAAACCCCCAGCCATCTCCCAATATCAAACACCACTATTTGTCTGATCCGTGCTTGTAACCGCTGTATTACTCCTCCTATCATTACCTGTTTTAGCTGCCGGAATTACAATACTACTAACAGACCGAAACCTTAATACCACTTTCTTTGACCCAGCAGGTGGAGGGGACCCAATCCTTTACCAACACCTATTCTGATTCTTCGGGCACCCGAAAGTTTATATTCTTATTCTCCCGGGATTCGGAATTATTTCCCACGTCGTAGCCTACTACTCAGGTAAAAAAGAACCATTTGGTTATATAGGAATAGTTTGAGCCATAATGGCCATCGGCCTTCTAGGATTTATCGTATGGGCCCACCACATGTTCACTGTTGGAATAGACGTAGACACTCGTGCATACTTCACATCTGCGACAATAATTATTGCAATTCCAACAGGTGTAAAAGTATTCAGCTGACTAGCCACACTTCACGGAGGGTCTATTAAATGAGAAACACCTATGCTATGGGCCCTAGGATTTATTTTCCTGTTCACAGTAGGTGGTTTAACAGGAATTGTCCTATCCAACTCATCACTAGACATTGTCCTTCATGACACCTATTATGTAGTTGCGCATTTCCACTATGTACTATCAATAGGTGCCGTATTCGCCATTATAGCAGCTTTCGTACACTGATTCCCCCTATTAACCGGATATACCCTACACAGCGCCTGAACAAAAATCCACTTTGCGGTTATGTTTATTGGGGTCAACCTCACATTCTTCCCACAACACTTCCTAGGCCTAGCAGGCATGCCACGACGATATTCTGACTATCCAGACGCCTACGCCCTGTGAAACACAGTATCATCTATTGGGTCATTAATCTCTTTAGTAGCAGTAATCATGTTCCTATTTATTCTATGAGAAGCCTTCGCCGCTAAACGGGAAGTATTATCCGTAGAACTAACAATAACAAACGTAGAATGACTTCACGGCTGCCCTCCCCCTTACCACACATACGAAGAACCAGCATTCGTACAAATTCAATCAAATTAA
>gi|1145139947|gb|KY320007.1| Poropuntius normani voucher SCU8730 cytochrome c oxidase subunit I (COI) gene, complete cds; mitochondrial
GTGGCAATCACGCGCTGATTCTTCTCTACTAACCACAAAGACATTGGTACCCTTTATCTTGTATTTGGTGCCTGAGCCGGAATAGTAGGAACCGCCTTAAGCCTTCTTATTCGGGCTGAACTTAGCCAACCCGGATCACTTCTAGGTGATGACCAAATTTATAACGTCATCGTTACCGCCCACGCCTTTGTAATAATTTTCTTTATAGTAATGCCCATTCTCATTGGAGGATTTGGGAACTGACTCGTACCACTAATAATCGGAGCCCCAGACATAGCATTTCCACGAATAAATAACATAAGCTTTTGACTACTGCCCCCATCATTTCTGCTATTATTAGCCTCCTCTGGTGTTGAAGCTGGGGCTGGAACAGGGTGAACAGTATACCCACCTCTTGCAGGAAATCTAGCCCACGCAGGAGCATCAGTAGACCTGACAATTTTCTCGCTCCACTTAGCAGGTGTGTCATCAATTTTAGGTGCAATTAATTTTATTACCACAACTATTAACATGAAACCCCCAGCCATCTCCCAATATCAAACACCACTATTTGTCTGATCCGTGCTTGTAACCGCTGTATTACTCCTCCTATCATTACCTGTTTTAGCTGCCGGAATTACAATACTACTAACAGACCGAAACCTTAATACCACTTTCTTTGACCCAGCAGGTGGAGGGGACCCAATCCTTTACCAACACCTATTCTGATTCTTCGGGCACCCGAAAGTTTATATTCTTATTCTCCCGGGATTCGGAATTATTTCCCACGTCGTAGCCTACTACTCAGGTAAAAAAGAACCATTTGGTTATATAGGAATAGTTTGAGCCATAATGGCCATCGGCCTTCTAGGATTTATCGTATGGGCCCACCACATGTTCACTGTTGGAATAGACGTAGACACTCGTGCATACTTCACATCTGCGACAATAATTATTGCAATTCCAACAGGTGTAAAAGTATTCAGCTGACTAGCCACACTTCACGGAGGGTCTATTAAATGAGAAACACCTATGCTATGGGCCCTAGGATTTATTTTCCTGTTCACAGTAGGTGGTTTAACAGGAATTGTCCTATCCAACTCATCACTAGACATTGTCCTTCATGACACCTATTATGTAGTTGCGCATTTCCACTATGTACTATCAATAGGTGCCGTATTCGCCATTATAGCAGCTTTCGTACACTGATTCCCCCTATTAACCGGATATACCCTACACAGCGCCTGAACAAAAATCCACTTTGCGGTTATGTTTATTGGGGTCAACCTCACATTCTTCCCACAACACTTCCTAGGCCTAGCAGGCATGCCACGACGATATTCTGACTATCCAGACGCCTACGCCCTGTGAAACACAGTATCATCTATTGGGTCATTAATCTCTTTAGTAGCAGTAATCATGTTCCTATTTATTCTATGAGAAGCCTTCGCCGCTAAACGGGAAGTATTATCCGTAGAACTAACAATAACAAACGTAGAATGACTTCACGGCTGCCCTCCCCCTTACCACACATACGAAGAACCAGCATTCGTACAAATTCAATCAAATTAA
>gi|1145139949|gb|KY320008.1| Poropuntius normani voucher SUC8731 cytochrome c oxidase subunit I (COI) gene, complete cds; mitochondrial
GTGGCAATCACGCGCTGATTCTTCTCTACTAACCACAAAGACATTGGTACCCTTTATCTTGTATTTGGTGCCTGAGCCGGAATAGTAGGAACCGCCTTAAGCCTTCTTATTCGGGCTGAACTTAGCCAACCCGGATCACTTCTAGGTGATGACCAAATTTATAACGTCATCGTTACCGCCCACGCCTTTGTAATAATTTTCTTTATAGTAATGCCCATTCTCATTGGAGGATTTGGGAACTGACTCGTACCACTAATAATCGGAGCCCCAGACATAGCATTTCCACGAATAAATAACATAAGCTTTTGACTACTGCCCCCATCATTTCTGCTATTATTAGCCTCCTCTGGTGTTGAAGCTGGGGCTGGAACAGGGTGAACAGTATACCCACCTCTTGCAGGAAATCTAGCCCACGCAGGAGCATCAGTAGACCTGACAATTTTCTCGCTCCACTTAGCAGGTGTGTCATCAATTTTAGGTGCAATTAATTTTATTACCACAACTATTAACATGAAACCCCCAGCCATCTCCCAATATCAAACACCACTATTTGTCTGATCCGTGCTTGTAACCGCTGTATTACTCCTCCTATCATTACCTGTTTTAGCTGCCGGAATTACAATACTACTAACAGACCGAAACCTTAATACCACTTTCTTTGACCCAGCAGGTGGAGGGGACCCAATCCTTTACCAACACCTATTCTGATTCTTCGGGCACCCGAAAGTTTATATTCTTATTCTCCCGGGATTCGGAATTATTTCCCACGTCGTAGCCTACTACTCAGGTAAAAAAGAACCATTTGGTTATATAGGAATAGTTTGAGCCATAATGGCCATCGGCCTTCTAGGATTTATCGTATGGGCCCACCACATGTTCACTGTTGGAATAGACGTAGACACTCGTGCATACTTCACATCTGCGACAATAATTATTGCAATTCCAACAGGTGTAAAAGTATTCAGCTGACTAGCCACACTTCACGGAGGGTCTATTAAATGAGAAACACCTATGCTATGGGCCCTAGGATTTATTTTCCTGTTCACAGTAGGTGGTTTAACAGGAATTGTCCTATCCAACTCATCACTAGACATTGTCCTTCATGACACCTATTATGTAGTTGCGCATTTCCACTATGTACTATCAATAGGTGCCGTATTCGCCATTATAGCAGCTTTCGTACACTGATTCCCCCTATTAACCGGATATACCCTACACAGCGCCTGAACAAAAATCCACTTTGCGGTTATGTTTATTGGGGTCAACCTCACATTCTTCCCACAACACTTCCTAGGCCTAGCAGGCATGCCACGACGATATTCTGACTATCCAGACGCCTACGCCCTGTGAAACACAGTATCATCTATTGGGTCATTAATCTCTTTAGTAGCAGTAATCATGTTCCTATTTATTCTATGAGAAGCCTTCGCCGCTAAACGGGAAGTATTATCCGTAGAACTAACAATAACAAACGTAGAATGACTTCACGGCTGCCCTCCCCCTTACCACACATACGAAGAACCAGCATTCGTACAAATTCAATCAAATTAA
>gi|1145139951|gb|KY320009.1| Poropuntius normani voucher SUC8732 cytochrome c oxidase subunit I (COI) gene, complete cds; mitochondrial
GTGGCAATCACGCGCTGATTCTTCTCTACTAACCACAAAGACATTGGTACCCTCTATCTTGTATTTGGTGCCTGAGCCGGAATAGTAGGAACCGCCTTAAGCCTTCTTATTCGGGCTGAACTTAGCCAACCCGGATCACTTCTAGGTGATGACCAAATTTATAACGTCATCGTTACCGCCCACGCCTTTGTAATAATTTTCTTTATAGTAATGCCCATTCTCATTGGAGGATTTGGGAACTGACTCGTGCCACTAATAATCGGAGCCCCAGACATAGCATTTCCACGAATAAATAACATAAGCTTTTGACTACTGCCCCCATCATTTCTGCTATTATTAGCCTCCTCTGGTGTTGAAGCTGGGGCTGGAACAGGGTGAACAGTATACCCACCTCTTGCAGGAAATCTAGCCCACGCAGGAGCATCAGTAGACCTGACAATTTTCTCGCTCCACTTAGCAGGTGTGTCATCAATTTTAGGTGCAATTAATTTTATTACCACAACTATTAACATGAAACCCCCAGCCATCTCCCAATATCAAACACCACTATTTGTCTGATCCGTGCTTGTAACCGCTGTATTACTCCTCCTATCATTACCTGTTTTAGCTGCCGGAATTACAATACTACTAACAGACCGAAACCTTAATACCACTTTCTTTGACCCAGCAGGTGGAGGGGACCCAATCCTTTACCAACACCTATTCTGATTCTTCGGGCACCCGAAAGTTTATATTCTTATTCTCCCGGGATTCGGAATTATTTCCCACGTCGTAGCCTACTACTCAGGTAAAAAAGAACCATTTGGTTATATAGGAATAGTTTGAGCCATAATGGCCATCGGCCTTCTAGGATTTATCGTATGGGCCCACCACATGTTCACTGTTGGAATAGACGTAGACACTCGTGCATACTTCACATCTGCGACAATAATTATTGCAATTCCAACAGGTGTAAAAGTATTCAGCTGACTAGCCACACTTCACGGAGGGTCTATTAAATGAGAAACACCTATGCTATGGGCCCTAGGATTTATTTTCCTGTTCACAGTAGGTGGTTTAACAGGAATTGTCCTATCCAACTCATCACTAGACATTGTCCTTCATGACACCTATTATGTAGTTGCGCATTTCCACTATGTACTATCAATAGGTGCCGTATTCGCCATTATAGCAGCTTTCGTACACTGATTCCCCCTATTAACCGGATATACCCTACACAGCGCCTGAACAAAAATCCACTTTGCGGTTATGTTTATTGGGGTCAACCTCACATTCTTCCCACAACACTTCCTAGGCCTAGCAGGCATGCCACGACGATATTCTGACTATCCAGACGCCTACGCCCTGTGAAACACAGTATCATCTATTGGGTCATTAATCTCTTTAGTAGCAGTAATCATGTTCCTATTTATTCTATGAGAAGCCTTCGCCGCTAAACGGGAAGTATTATCCGTAGAACTAACAATAACAAACGTAGAATGACTTCACGGCTGCCCTCCCCCTTACCACACATACGAAGAACCAGCATTCGTACAAATTCAATCAAATTAA
>gi|1145139953|gb|KY320010.1| Poropuntius normani voucher SUC8733 cytochrome c oxidase subunit I (COI) gene, complete cds; mitochondrial
GTGGCAATCACGCGCTGATTCTTCTCTACTAACCACAAAGACATTGGTACCCTCTATCTTGTATTTGGTGCCTGAGCCGGAATAGTAGGAACCGCCTTAAGCCTTCTTATTCGGGCTGAACTTAGCCAACCCGGATCACTTCTAGGTGATGACCAAATTTATAACGTCATCGTTACCGCCCACGCCTTTGTAATAATTTTCTTTATAGTAATGCCCATTCTCATTGGAGGATTTGGGAACTGACTCGTGCCACTAATAATCGGAGCCCCAGACATAGCATTTCCACGAATAAATAACATAAGCTTTTGACTACTGCCCCCATCATTTCTGCTATTATTAGCCTCCTCTGGTGTTGAAGCTGGGGCTGGAACAGGGTGAACAGTATACCCACCTCTTGCAGGAAATCTAGCCCACGCAGGAGCATCAGTAGACCTGACAATTTTCTCGCTCCACTTAGCAGGTGTGTCATCAATTTTAGGTGCAATTAATTTTATTACCACAACTATTAACATGAAACCCCCAGCCATCTCCCAATATCAAACACCACTATTTGTCTGATCCGTGCTTGTAACCGCTGTATTACTCCTCCTATCATTACCTGTTTTAGCTGCCGGAATTACAATACTACTAACAGACCGAAACCTTAATACCACTTTCTTTGACCCAGCAGGTGGAGGGGACCCAATCCTTTACCAACACCTATTCTGATTCTTCGGGCACCCGAAAGTTTATATTCTTATTCTCCCGGGATTCGGAATTATTTCCCACGTCGTAGCCTACTACTCAGGTAAAAAAGAACCATTTGGTTATATAGGAATAGTTTGAGCCATAATGGCCATCGGCCTTCTAGGATTTATCGTATGGGCCCACCACATGTTCACTGTTGGAATAGACGTAGACACTCGTGCATACTTCACATCTGCGACAATAATTATTGCAATTCCAACAGGTGTAAAAGTATTCAGCTGACTAGCCACACTTCACGGAGGGTCTATTAAATGAGAAACACCTATGCTATGGGCCCTAGGATTTATTTTCCTGTTCACAGTAGGTGGTTTAACAGGAATTGTCCTATCCAACTCATCACTAGACATTGTCCTTCATGACACCTATTATGTAGTTGCGCATTTCCACTATGTACTATCAATAGGTGCCGTATTCGCCATTATAGCAGCTTTCGTACACTGATTCCCCCTATTAACCGGATATACCCTACACAGCGCCTGAACAAAAATCCACTTTGCGGTTATGTTTATTGGGGTCAACCTCACATTCTTCCCACAACACTTCCTAGGCCTAGCAGGCATGCCACGACGATATTCTGACTATCCAGACGCCTACGCCCTGTGAAACACAGTATCATCTATTGGGTCATTAATCTCTTTAGTAGCAGTAATCATGTTCCTATTTATTCTATGAGAAGCCTTCGCCGCTAAACGGGAAGTATTATCCGTAGAACTAACAATAACAAACGTAGAATGACTTCACGGCTGCCCTCCCCCTTACCACACATACGAAGAACCAGCATTCGTACAAATTCAATCAAATTAA
>gi|1145139955|gb|KY320011.1| Poropuntius normani voucher SUC8734 cytochrome c oxidase subunit I (COI) gene, complete cds; mitochondrial
GTGGCAATCACGCGCTGATTCTTCTCTACTAACCACAAAGACATTGGTACCCTTTATCTTGTATTTGGTGCCTGAGCCGGAATAGTAGGAACCGCCTTAAGCCTTCTTATTCGGGCTGAACTTAGCCAACCCGGATCACTTCTAGGTGATGACCAAATTTATAACGTCATCGTTACCGCCCACGCCTTTGTAATAATTTTCTTTATAGTAATGCCCATTCTCATTGGAGGATTTGGGAACTGACTCGTACCACTAATAATCGGAGCCCCAGACATAGCATTTCCACGAATAAATAACATAAGCTTTTGACTACTGCCCCCATCATTTCTGCTATTATTAGCCTCCTCTGGTGTTGAAGCTGGGGCTGGAACAGGGTGAACAGTATACCCACCTCTTGCAGGAAATCTAGCCCACGCAGGAGCATCAGTAGACCTGACAATTTTCTCGCTCCACTTAGCAGGTGTGTCATCAATTTTAGGTGCAATTAATTTTATTACCACAACTATTAACATGAAACCCCCAGCCATCTCCCAATATCAAACACCACTATTTGTCTGATCCGTGCTTGTAACCGCTGTATTACTCCTCCTATCATTACCTGTTTTAGCTGCCGGAATTACAATACTACTAACAGACCGAAACCTTAATACCACTTTCTTTGACCCAGCAGGTGGAGGGGACCCAATCCTTTACCAACACCTATTCTGATTCTTCGGGCACCCGAAAGTTTATATTCTTATTCTCCCGGGATTCGGAATTATTTCCCACGTCGTAGCCTACTACTCAGGTAAAAAAGAACCATTTGGTTATATAGGAATAGTTTGAGCCATAATGGCCATCGGCCTTCTAGGATTTATCGTATGGGCCCACCACATGTTCACTGTTGGAATAGACGTAGACACTCGTGCATACTTCACATCTGCGACAATAATTATTGCAATTCCAACAGGTGTAAAAGTATTCAGCTGACTAGCCACACTTCACGGAGGGTCTATTAAATGAGAAACACCTATGCTATGGGCCCTAGGATTTATTTTCCTGTTCACAGTAGGTGGTTTAACAGGAATTGTCCTATCCAACTCATCACTAGACATTGTCCTTCATGACACCTATTATGTAGTTGCGCATTTCCACTATGTACTATCAATAGGTGCCGTATTCGCCATTATAGCAGCTTTCGTACACTGATTCCCCCTATTAACCGGATATACCCTACACAGCGCCTGAACAAAAATCCACTTTGCGGTTATGTTTATTGGGGTCAACCTCACATTCTTCCCACAACACTTCCTAGGCCTAGCAGGCATGCCACGACGATATTCTGACTATCCAGACGCCTACGCCCTGTGAAACACAGTATCATCTATTGGGTCATTAATCTCTTTAGTAGCAGTAATCATGTTCCTATTTATTCTATGAGAAGCCTTCGCCGCTAAACGGGAAGTATTATCCGTAGAACTAACAATAACAAACGTAGAATGACTTCACGGCTGCCCTCCCCCTTACCACACATACGAAGAACCAGCATTCGTACAAATTCAATCAAATTAA
>gi|1145139957|gb|KY320012.1| Poropuntius normani voucher SUC8735 cytochrome c oxidase subunit I (COI) gene, complete cds; mitochondrial
GTGGCAATCACGCGCTGATTCTTCTCTACTAACCACAAAGACATTGGTACCCTCTATCTTGTATTTGGTGCCTGAGCCGGAATAGTAGGAACCGCCTTAAGCCTTCTTATTCGGGCTGAACTTAGCCAACCCGGATCACTTCTAGGTGATGACCAAATTTATAACGTCATCGTTACCGCCCACGCCTTTGTAATAATTTTCTTTATAGTAATGCCCATTCTCATTGGAGGATTTGGGAACTGACTCGTGCCACTAATAATCGGAGCCCCAGACATAGCATTTCCACGAATAAATAACATAAGCTTTTGACTACTGCCCCCATCATTTCTGCTATTATTAGCCTCCTCTGGTGTTGAAGCTGGGGCTGGAACAGGGTGAACAGTATACCCACCTCTTGCAGGAAATCTAGCCCACGCAGGAGCATCAGTAGACCTGACAATTTTCTCGCTCCACTTAGCAGGTGTGTCATCAATTTTAGGTGCAATTAATTTTATTACCACAACTATTAACATGAAACCCCCAGCCATCTCCCAATATCAAACACCACTATTTGTCTGATCCGTGCTTGTAACCGCTGTATTACTCCTCCTATCATTACCTGTTTTAGCTGCCGGAATTACAATACTACTAACAGACCGAAACCTTAATACCACTTTCTTTGACCCAGCAGGTGGAGGGGACCCAATCCTTTACCAACACCTATTCTGATTCTTCGGGCACCCGAAAGTTTATATTCTTATTCTCCCGGGATTCGGAATTATTTCCCACGTCGTAGCCTACTACTCAGGTAAAAAAGAACCATTTGGTTATATAGGAATAGTTTGAGCCATAATGGCCATCGGCCTTCTAGGATTTATCGTATGGGCCCACCACATGTTCACTGTTGGAATAGACGTAGACACTCGTGCATACTTCACATCTGCGACAATAATTATTGCAATTCCAACAGGTGTAAAAGTATTCAGCTGACTAGCCACACTTCACGGAGGGTCTATTAAATGAGAAACACCTATGCTATGGGCCCTAGGATTTATTTTCCTGTTCACAGTAGGTGGTTTAACAGGAATTGTCCTATCCAACTCATCACTAGACATTGTCCTTCATGACACCTATTATGTAGTTGCGCATTTCCACTATGTACTATCAATAGGTGCCGTATTCGCCATTATAGCAGCTTTCGTACACTGATTCCCCCTATTAACCGGATATACCCTACACAGCGCCTGAACAAAAATCCACTTTGCGGTTATGTTTATTGGGGTCAACCTCACATTCTTCCCACAACACTTCCTAGGCCTAGCAGGCATGCCACGACGATATTCTGACTATCCAGACGCCTACGCCCTGTGAAACACAGTATCATCTATTGGGTCATTAATCTCTTTAGTAGCAGTAATCATGTTCCTATTTATTCTATGAGAAGCCTTCGCCGCTAAACGGGAAGTATTATCCGTAGAACTAACAATAACAAACGTAGAATGACTTCACGGCTGCCCTCCCCCTTACCACACATACGAAGAACCAGCATTCGTACAAATTCAATCAAATTAA
>gi|1145139959|gb|KY320013.1| Poropuntius normani voucher SUC8736 cytochrome c oxidase subunit I (COI) gene, complete cds; mitochondrial
GTGGCAATCACGCGCTGATTCTTCTCTACTAACCACAAAGACATTGGTACCCTTTATCTTGTATTTGGTGCCTGAGCCGGAATAGTAGGAACCGCCTTAAGCCTTCTTATTCGGGCTGAACTTAGCCAACCCGGATCACTTCTAGGTGATGACCAAATTTATAACGTCATCGTTACCGCCCACGCCTTTGTAATAATTTTCTTTATAGTAATGCCCATTCTCATTGGAGGATTTGGGAACTGACTCGTGCCACTAATAATCGGAGCCCCAGACATAGCATTTCCACGAATAAATAACATAAGCTTTTGACTACTGCCCCCATCATTTCTGCTATTATTAGCCTCCTCTGGTGTTGAAGCTGGGGCTGGAACAGGGTGAACAGTATACCCACCTCTTGCAGGAAATCTAGCCCACGCAGGAGCATCAGTAGACCTGACAATTTTCTCGCTCCACTTAGCAGGTGTGTCATCAATTTTAGGTGCAATTAATTTTATTACCACAACTATTAACATGAAACCCCCAGCCATCTCCCAATATCAAACACCACTATTTGTCTGATCCGTGCTTGTAACCGCTGTATTACTCCTCCTATCATTACCTGTTTTAGCTGCCGGAATTACAATACTACTAACAGACCGAAACCTTAATACCACTTTCTTTGACCCAGCAGGTGGAGGGGACCCAATCCTTTACCAACACCTATTCTGATTCTTCGGGCACCCGAAAGTTTATATTCTTATTCTCCCGGGATTCGGAATTATTTCCCACGTCGTAGCCTACTACTCAGGTAAAAAAGAACCATTTGGTTATATAGGAATAGTTTGAGCCATAATGGCCATCGGCCTTCTAGGATTTATCGTATGGGCCCACCACATGTTCACTGTTGGAATAGACGTAGACACTCGTGCATACTTCACATCTGCGACAATAATTATTGCAATTCCAACAGGTGTAAAAGTATTCAGCTGACTAGCCACACTTCACGGAGGGTCTATTAAATGAGAAACACCTATGCTATGGGCCCTAGGATTTATTTTCCTGTTCACAGTAGGTGGTTTAACAGGAATTGTCCTATCCAACTCATCACTAGACATTGTCCTTCATGACACCTATTATGTAGTTGCGCATTTCCACTATGTACTATCAATAGGTGCCGTATTCGCCATTATAGCAGCTTTCGTACACTGATTCCCCCTATTAACCGGATATACCCTACACAGCGCCTGAACAAAAATCCACTTTGCGGTTATGTTTATTGGGGTCAACCTCACATTCTTCCCACAACACTTCCTAGGCCTAGCAGGCATGCCACGACGATATTCTGACTATCCAGACGCCTACGCCCTGTGAAACACAGTATCATCTATTGGGTCATTAATCTCTTTAGTAGCAGTAATCATGTTCCTATTTATTCTATGAGAAGCCTTCGCCGCTAAACGGGAAGTATTATCCGTAGAACTAACAATAACAAACGTAGAATGACTTCACGGCTGCCCTCCCCCTTACCACACATACGAAGAACCAGCATTCGTACAAATTCAATCAAATTAA
>gi|1145139961|gb|KY320014.1| Poropuntius normani voucher SUC8737 cytochrome c oxidase subunit I (COI) gene, complete cds; mitochondrial
GTGGCAATCACGCGCTGATTCTTCTCTACTAACCACAAAGACATTGGTACCCTTTATCTTGTATTTGGTGCCTGAGCCGGAATAGTAGGAACCGCCTTAAGCCTTCTTATTCGGGCTGAACTTAGCCAACCCGGATCACTTCTAGGTGATGACCAAATTTATAACGTCATCGTTACCGCCCACGCCTTTGTAATAATTTTCTTTATAGTAATGCCCATTCTCATTGGAGGATTTGGGAACTGACTCGTGCCACTAATAATCGGAGCCCCAGACATAGCATTTCCACGAATAAATAACATAAGCTTTTGACTACTGCCCCCATCATTTCTGCTATTATTAGCCTCCTCTGGTGTTGAAGCTGGGGCTGGAACAGGGTGAACAGTATACCCACCTCTTGCAGGAAATCTAGCCCACGCAGGAGCATCAGTAGACCTGACAATTTTCTCGCTCCACTTAGCAGGTGTGTCATCAATTTTAGGTGCAATTAATTTTATTACCACAACTATTAACATGAAACCCCCAGCCATCTCCCAATATCAAACACCACTATTTGTCTGATCCGTGCTTGTAACCGCTGTATTACTCCTCCTATCATTACCTGTTTTAGCTGCCGGAATTACAATACTACTAACAGACCGAAACCTTAATACCACTTTCTTTGACCCAGCAGGTGGAGGGGACCCAATCCTTTACCAACACCTATTCTGATTCTTCGGGCACCCGAAAGTTTATATTCTTATTCTCCCGGGATTCGGAATTATTTCCCACGTCGTAGCCTACTACTCAGGTAAAAAAGAACCATTTGGTTATATAGGAATAGTTTGAGCCATAATGGCCATCGGCCTTCTAGGATTTATCGTATGGGCCCACCACATGTTCACTGTTGGAATAGACGTAGACACTCGTGCATACTTCACATCTGCGACAATAATTATTGCAATTCCAACAGGTGTAAAAGTATTCAGCTGACTAGCCACACTTCACGGAGGGTCTATTAAATGAGAAACACCTATGCTATGGGCCCTAGGATTTATTTTCCTGTTCACAGTAGGTGGTTTAACAGGAATTGTCCTATCCAACTCATCACTAGACATTGTCCTTCATGACACCTATTATGTAGTTGCGCATTTCCACTATGTACTATCAATAGGTGCCGTATTCGCCATTATAGCAGCTTTCGTACACTGATTCCCCCTATTAACCGGATATACCCTACACAGCGCCTGAACAAAAATCCACTTTGCGGTTATGTTTATTGGGGTCAACCTCACATTCTTCCCACAACACTTCCTAGGCCTAGCAGGCATGCCACGACGATATTCTGACTATCCAGACGCCTACGCCCTGTGAAACACAGTATCATCTATTGGGTCATTAATCTCTTTAGTAGCAGTAATCATGTTCCTATTTATTCTATGAGAAGCCTTCGCCGCTAAACGGGAAGTATTATCCGTAGAACTAACAATAACAAACGTAGAATGACTTCACGGCTGCCCTCCCCCTTACCACACATACGAAGAACCAGCATTCGTACAAATTCAATCAAATTAA
>gi|1145139963|gb|KY320015.1| Poropuntius normani voucher SUC8738 cytochrome c oxidase subunit I (COI) gene, complete cds; mitochondrial
GTGGCAATCACGCGCTGATTCTTCTCTACTAACCACAAAGACATTGGTACCCTTTATCTTGTATTTGGTGCCTGAGCCGGAATAGTAGGAACCGCCTTAAGCCTTCTTATTCGGGCTGAACTTAGCCAACCCGGATCACTTCTAGGTGATGACCAAATTTATAACGTCATCGTTACCGCCCACGCCTTTGTAATAATTTTCTTTATAGTAATGCCCATTCTCATTGGAGGATTTGGGAACTGACTCGTACCACTAATAATCGGAGCCCCAGACATAGCATTTCCACGAATAAATAACATAAGCTTTTGACTACTGCCCCCATCATTTCTGCTATTATTAGCCTCCTCTGGTGTTGAAGCTGGGGCTGGAACAGGGTGAACAGTATACCCACCTCTTGCAGGAAATCTAGCCCACGCAGGAGCATCAGTAGACCTGACAATTTTCTCGCTCCACTTAGCAGGTGTGTCATCAATTTTAGGTGCAATTAATTTTATTACCACAACTATTAACATGAAACCCCCAGCCATCTCCCAATATCAAACACCACTATTTGTCTGATCCGTGCTTGTAACCGCTGTATTACTCCTCCTATCATTACCTGTTTTAGCTGCCGGAATTACAATACTACTAACAGACCGAAACCTTAATACCACTTTCTTTGACCCAGCAGGTGGAGGGGACCCAATCCTTTACCAACACCTATTCTGATTCTTCGGGCACCCGAAAGTTTATATTCTTATTCTCCCGGGATTCGGAATTATTTCCCACGTCGTAGCCTACTACTCAGGTAAAAAAGAACCATTTGGTTATATAGGAATAGTTTGAGCCATAATGGCCATCGGCCTTCTAGGATTTATCGTATGGGCCCACCACATGTTCACTGTTGGAATAGACGTAGACACTCGTGCATACTTCACATCTGCGACAATAATTATTGCAATTCCAACAGGTGTAAAAGTATTCAGCTGACTAGCCACACTTCACGGAGGGTCTATTAAATGAGAAACACCTATGCTATGGGCCCTAGGATTTATTTTCCTGTTCACAGTAGGTGGTTTAACAGGAATTGTCCTATCCAACTCATCACTAGACATTGTCCTTCATGACACCTATTATGTAGTTGCGCATTTCCACTATGTACTATCAATAGGTGCCGTATTCGCCATTATAGCAGCTTTCGTACACTGATTCCCCCTATTAACCGGATATACCCTACACAGCGCCTGAACAAAAATCCACTTTGCGGTTATGTTTATTGGGGTCAACCTCACATTCTTCCCACAACACTTCCTAGGCCTAGCAGGCATGCCACGACGATATTCTGACTATCCAGACGCCTACGCCCTGTGAAACACAGTATCATCTATTGGGTCATTAATCTCTTTAGTAGCAGTAATCATGTTCCTATTTATTCTATGAGAAGCCTTCGCCGCTAAACGGGAAGTATTATCCGTAGAACTAACAATAACAAACGTAGAATGACTTCACGGCTGCCCTCCCCCTTACCACACATACGAAGAACCAGCATTCGTACAAATTCAATCAAATTAA
>gi|186966681|gb|EU392233.1| Chelon labrosus isolate Cl cytochrome c oxidase subunit I (COI) gene, partial cds; mitochondrial
CCTTTATCTAGTATTCGGTGCCTGAGCGGGTATAGTAGGGACTGCCCTAAGCCTGCTTATCCGAGCAGAACTAAGCCAACCCGGTGCTCTCCTAGGAGACGACCAAATTTATAATGTAATTGTTACGGCACACGCTTTCGTAATAATTTTCTTTATAGTAATACCAATTATGATTGGAGGGTTTGGAAACTGACTAGTCCCCTTAATGATCGGTGCCCCCGACATAGCCTTCCCTCGAATAAACAACATAAGCTTTTGACTCCTTCCCCCTTCATTTCTTCTTCTCTTAGCATCCTCTGGCGTAGAAGCAGGAGCAGGTACTGGATGAACCGTATACCCTCCCCTAGCCAGCAATTTAGCGCATGCCGGGGCATCCGTCGACCTAACAATCTTCTCCCTCCACCTAGCAGGTGTCTCCTCAATTTTAGGTGCTATTAACTTCATCACAACTATTATCAACATGAAACCTCCCGCGATCTCCCAATATCAGACCCCTCTGTTCGTGTGAGCCGTCCTTATCACCGCCGTCCTTCTCCTCTTATCTCTGCCAGTTCTTGCTGCCGGAATCACCATGCTCCTAACAGATCGGAACTTAAATACCTCTTTCTTCGACCCAGCGGGAGGAGGAGATCCCATCTTGTACCAACACCTA
>gi|186966683|gb|EU392234.1| Liza aurata isolate La_A cytochrome c oxidase subunit I (COI) gene, partial cds; mitochondrial
CCTTTATCTAGTATTTGGTGCCTGAGCGGGTATAGTAGGGACTGCCTTAAGCCTGCTTATCCGAGCAGAACTAAGCCAGCCTGGTGCTCTCCTAGGAGACGACCAAATTTATAATGTAATTGTTACGGCACACGCTTTCGTAATAATTTTCTTTATAGTAATGCCAATTATGATTGGAGGGTTTGGAAACTGATTAATTCCCTTAATGATCGGCGCTCCCGACATGGCCTTCCCTCGAATAAACAACATAAGCTTCTGACTTCTTCCCCCCTCATTCCTCCTTCTCTTAGCATCCTCTGGCGTAGAAGCAGGGGCAGGCACTGGGTGAACCGTATACCCTCCCCTAGCCAGCAATTTAGCACATGCTGGGGCATCCGTCGACTTAACAATCTTCTCCCTCCACCTAGCAGGTGTCTCCTCAATTTTAGGCGCTATTAACTTCATCACAACTATTATCAATATGAAACCTCCCGCGATCTCCCAATATCAGACCCCTCTATTTGTATGAGCCGTCCTTATTACCGCCGTACTTCTCCTCCTGTCTCTGCCAGTCCTTGCTGCCGGAATCACTATGCTTCTGACAGATCGAAATTTAAATACCTCTTTCTTCGACCCAGCAGGAGGGGGAGATCCCATCTTATACCAACACCTA
>gi|186966685|gb|EU392235.1| Liza aurata isolate La_M cytochrome c oxidase subunit I (COI) gene, partial cds; mitochondrial
CCTTTATCTAGTATTTGGTGCCTGAGCGGGTATAGTAGGGACTGCCTTAAGCCTGCTTATCCGAGCAGAACTAAGCCAGCCTGGTGCTCTCCTAGGAGACGACCAAATTTATAATGTAATTGTTACGGCACACGCTTTCGTAATAATTTTCTTTATAGTAATGCCAATTATGATTGGAGGGTTTGGAAACTGATTAATTCCCTTAATGATCGGCGCTCCCGACATGGCCTTCCCTCGAATAAACAACATAAGCTTCTGACTTCTTCCCCCCTCATTCCTCCTTCTCTTAGCATCCTCTGGCGTAGAAGCAGGGGCAGGCACTGGGTGAACCGTATACCCTCCCCTAGCCAGCAATTTAGCACATGCTGGGGCATCCGTCGACTTAACAATCTTCTCCCTCCACCTAGCAGGTGTCTCCTCAATTTTAGGCGCTATTAACTTCATCACAACTATTATCAATATGAAACCTCCCGCGATCTCCCAATATCAGACCCCTCTATTTGTATGAGCCGTCCTTATTACCGCCGTACTTCTCCTCCTGTCTCTGCCAGTCCTTGCTGCCGGAATCACTATGCTTCTGACAGATCGAAATTTAAATACCTCTTTCTTCGACCCAGCAGGAGGGGGAGATCCCATCTTATACCAACACCTA
>gi|186966687|gb|EU392236.1| Liza haematocheila isolate Ch_A cytochrome c oxidase subunit I (COI) gene, partial cds; mitochondrial
CCTCTATCTAATCTTCGGTGCCTGAGCAGGTATAGTAGGGACTGCCCTAAGCCTGCTTATCCGAGCAGAACTAAGCCAGCCTGGCGCTCTCCTAGGGGACGACCAGATCTATAATGTAATCGTTACAGCACACGCCTTCGTAATAATTTTCTTTATAGTAATGCCAATCATGATTGGAGGGTTCGGAAACTGACTAATCCCCTTAATGATCGGCGCCCCCGACATGGCCTTCCCTCGAATAAATAACATGAGCTTCTGACTCCTCCCTCCCTCATTTCTTCTCCTTTTAGCATCCTCTGGCGTAGAAGCAGGGGCCGGGACCGGATGAACCGTCTACCCTCCCTTAGCCAGCAACCTAGCACATGCCGGAGCATCAGTTGACTTAACAATTTTCTCCCTTCACCTGGCAGGTGTTTCCTCAATTCTAGGAGCCATTAACTTTATTACTACTATTATTAACATGAAACCCCCCGCAATTTCCCAATACCAAACTCCGCTCTTCGTATGAGCCGTTCTAATTACTGCCGTCCTCCTTCTCCTATCCCTGCCAGTCCTTGCTGCCGGAATTACCATACTCTTAACAGATCGAAACTTAAACACTTCTTTCTTCGACCCAGCAGGAGGGGGGGATCCCATTCTATACCAGCACCTA
>gi|186966689|gb|EU392237.1| Liza haematocheila isolate Ch_J cytochrome c oxidase subunit I (COI) gene, partial cds; mitochondrial
CCTCTATCTAATCTTCGGTGCCTGAGCAGGTATAGTAGGGACTGCCCTAAGCCTGCTTATCCGAGCAGAACTAAGCCAGCCTGGCGCTCTCCTAGGGGACGACCAGATCTATAATGTAATCGTTACAGCACACGCCTTCGTAATAATTTTCTTTATAGTAATGCCAATCATGATTGGAGGGTTCGGAAACTGACTAATCCCCTTAATGATCGGCGCCCCCGACATGGCCTTCCCTCGAATAAATAACATGAGCTTCTGACTCCTCCCTCCCTCATTTCTTCTCCTTTTAGCATCCTCTGGCGTAGAAGCAGGGGCCGGGACCGGATGAACCGTCTACCCTCCCTTAGCCAGCAACCTAGCACATGCCGGAGCATCAGTTGACTTAACAATTTTCTCCCTTCACCTGGCAGGTGTTTCCTCAATTCTAGGAGCCATTAACTTTATTACTACTATTATTAACATGAAACCCCCCGCAATTTCCCAATACCAAACTCCGCTCTTCGTATGAGCCGTTCTAATTACTGCCGTCCTCCTTCTCCTATCTCTGCCAGTCCTTGCTGCCGGAATTACCATACTCTTAACAGATCGAAACTTAAACACTTCTTTCTTCGACCCAGCAGGAGGGGGGGATCCCATTCTATACCA
>gi|186966691|gb|EU392238.1| Liza haematocheila isolate Ch_T cytochrome c oxidase subunit I (COI) gene, partial cds; mitochondrial
CCTCTATCTAATCTTCGGTGCCTGAGCAGGTATAGTAGGGACTGCCCTAAGCCTGCTTATCCGAGCAGAACTAAGCCAGCCTGGCGCTCTCCTAGGGGACGACCAGATCTATAATGTAATCGTTACAGCACACGCCTTCGTAATAATTTTCTTTATAGTAATGCCAATCATGATTGGAGGGTTCGGAAACTGACTAATCCCCTTAATGATCGGCGCCCCCGACATGGCCTTCCCTCGAATAAATAACATAAGCTTCTGACTCCTCCCTCCCTCATTTCTTCTCCTTTTAGCATCCTCTGGCGTAGAAGCAGGGGCCGGGACCGGATGAACCGTCTACCCTCCCTTAGCCAGCAACCTAGCACATGCCGGAGCATCAGTTGACTTAACAATTTTCTCCCTTCACCTGGCAGGTGTTTCCTCAATTCTAGGAGCCATTAACTTTATTACTACTATTATTAACATGAAACCCCCCGCAATTTCCCAATACCAAACTCCGCTCTTCGTATGAGCCGTTCTAATTACTGCCGTCCTCCTTCTCCTATCCCTGCCAGTCCTTGCTGCCGGAATTACCATACTCTTAACAGATCGAAACT
>gi|186966693|gb|EU392239.1| Liza macrolepis isolate Lm cytochrome c oxidase subunit I (COI) gene, partial cds; mitochondrial
CCTCTATCTAGTATTCGGTGCCTGAGCGGGTATAGTAGGAACTGCCTTAAGCCTGCTTATCCGGGCAGAACTAAGCCAACCTGGCGCTCTCCTAGGGGACGACCAAATTTATAATGTAATTGTTACAGCACACGCTTTCGTAATAATTTTCTTTATAGTAATGCCAATCATGATCGGGGGATTTGGAAACTGACTAGTCCCTCTAATGATTGGGGCTCCCGACATGGCCTTCCCTCGAATAAACAACATAAGCTTTTGACTCCTCCCTCCCTCATTCCTCCTTCTCCTAGCCTCCTCTGGCGTAGAGGCAGGGGCCGGCACTGGATGAACCGTCTACCCTCCCCTAGCCAGCAACTTGGCACATGCCGGAGCATCCGTCGACCTAACAATCTTCTCCCTTCATTTAGCAGGTGTTTCCTCAATTTTAGGTGCTATTAACTTCATCACAACTATCATTAATATGAAACCCCCCGCAATTTCCCAATACCAGACCCCTCTCTTTGTATGAGCCGTCCTAATCACTGCTGTCCTTCTTCTTCTGTCCCTGCCAGTTCTTGCTGCCGGAATTACTATGCTCCTAACAGACCGAAATCTGAACACCTCTTTCTTCGACCCAGCAGGAGGAGGGGACCCCATTCTTTATCAACATCTA
>gi|186966695|gb|EU392240.1| Liza ramado isolate Lr cytochrome c oxidase subunit I (COI) gene, partial cds; mitochondrial
CCTTTATCTAGTATTTGGTGCCTGAGCGGGTATAGTAGGGACTGCCTTAAGCCTGCTTATCCGAGCAGAACTAAGCCAACCTGGCGCTCTCCTGGGAGACGACCAGATTTACAATGTAATTGTTACGGCACACGCTTTCGTAATAATTTTCTTTATAGTAATACCAATTATGATTGGAGGGTTTGGAAACTGACTAGTCCCCTTAATGATCGGCGCCCCCGACATGGCCTTTCCTCGAATAAACAACATAAGCTTCTGACTTCTCCCCCCTTCATTCCTCCTCCTTCTAGCATCCTCTGGCGTAGAAGCAGGGGCAGGCACTGGATGGACCGTGTACCCTCCCCTGGCCAGCAATTTAGCACATGCCGGGGCATCCGTCGACCTGACAATCTTTTCCCTTCACCTAGCAGGTGTCTCTTCAATTTTAGGTGCTATTAACTTCATCACAACCATTATCAATATGAAACCTCCTGCGATCTCCCAATATCAAACCCCCCTATTTGTGTGAGCCGTCCTTATCACCGCCGTCCTTCTCCTTTTATCCCTCCCAGTCCTTGCTGCCGGGATCACTATGCTCCTTACAGATCGAAACTTAAACACCTCTTTCTTCGATCCGGCGGGAGGAGGAGACCCCATCCTATATCAACATCTA
>gi|186966697|gb|EU392241.1| Chelon saliens isolate Ls cytochrome c oxidase subunit I (COI) gene, partial cds; mitochondrial
CCTTTATCTAGTATTTGGTGCCTGAGCGGGTATAGTAGGGACCGCCTTGAGCCTACTTATCCGAGCAGAACTAAGCCAACCTGGTGCTCTCTTAGGAGACGACCAGATTTACAATGTTATTGTTACGGCACATGCTTTCGTAATAATTTTCTTTATAGTAATACCAATTATGATTGGAGGGTTTGGAAACTGACTAGTCCCCTTAATGATCGGCGCCCCCGACATGGCCTTCCCTCGAATGAACAACATAAGCTTTTGACTTCTTCCCCCCTCATTCCTTCTTCTCTTAGCATCCTCTGGCGTAGAAGCAGGAGCAGGTACTGGATGAACCGTTTACCCTCCCCTCGCCAGCAATTTAGCACATGCTGGGGCATCCGTCGACTTAACAATCTTCTCCCTCCACCTAGCAGGTGTCTCCTCAATTTTAGGTGCTATTAACTTCATCACAACTATTATTAACATAAAACCCCCCGCAATTTCCCAGTATCAGACCCCTCTATTTGTGTGAGCCGTCCTTATTACCGCCGTCCTTCTCCTCTTATCTCTGCCAGTTCTTGCTGCCGGAATCACGATGCTCCTGACAGACCGGAATTTAAACACCTCTTTCTTCGACCCAGCAGGAGGAGGGGATCCGATCCTATACCAACACCTA
>gi|186966699|gb|EU392242.1| Liza subviridis isolate Lsub cytochrome c oxidase subunit I (COI) gene, partial cds; mitochondrial
CCTCTATCTAATCTTCGGTGCCTGAGCAGGTATAGTAGGGACCGCCCTAAGCCTGCTTATCCGGGCAGAACTAAGCCAGCCTGGCGCTCTCCTAGGGGACGACCAGATTTATAATGTAATCGTTACAGCACACGCTTTCGTAATAATTTTCTTTATAGTAATGCCAATTATGATTGGAGGGTTTGGAAACTGACTAATCCCCCTAATGATCGGCGCCCCCGATATGGCCTTCCCTCGAATAAATAACATAAGCTTTTGACTCCTACCTCCTTCGTTCCTTCTTCTCTTAGCGTCTTCTGGCGTAGAAGCAGGGGCCGGAACTGGATGAACCGTCTATCCTCCTCTAGCCAGCAACCTAGCACATGCCGGAGCATCAGTTGACCTTACAATTTTCTCCCTTCACCTGGCAGGTGTCTCCTCAATTTTAGGTGCTATTAACTTCATTACTACTATTATTAACATGAAACCTCCCGCAATTTCCCAGTACCAAACCCCACTCTTCGTATGGGCTGTTCTTATTACTGCCGTTCTCCTGCTTCTATCCCTGCCAGTTCTCGCTGCCGGAATTACCATGCTTTTAACAGATCGAAACTTAAACACTTCTTTCTTCGACCCAGCAGGAGGAGGAGATCCTATTCTATACCAGCACCTA
>gi|186966701|gb|EU392243.1| Mugil cephalus isolate Mc_A cytochrome c oxidase subunit I (COI) gene, partial cds; mitochondrial
CCTCTATCTAGTGTTTGGTGCCTGAGCCGGAATAGTAGGTACTGCCCTAAGCCTACTTATCCGAGCTGAACTAAGTCAACCCGGCGCTCTTCTAGGAGACGACCAGATTTATAATGTAATCGTTACAGCGCATGCTTTTGTAATAATCTTTTTTATAGTAATACCAATTATGATCGGGGGCTTTGGAAATTGACTAATTCCCCTAATAATTGGGGCACCTGACATAGCTTTTCCCCGAATAAATAATATGAGCTTCTGACTTCTTCCTCCATCATTCCTTCTCCTTCTAGCTTCTTCGGGAGTAGAAGCTGGGGCAGGAACAGGATGGACTGTTTATCCCCCATTAGCCAGCAACCTGGCTCACGCCGGAGCGTCTGTTGACCTTACCATTTTCTCCCTCCACCTTGCAGGTGTTTCCTCAATTTTAGGCGCTATTAACTTTATTACAACAATCATCAATATGAAACCTCCAGCTACTTCTCAATATCAAACACCCCTTTTCGTGTGAGCTGTCCTAATTACCGCTGTACTCCTTCTTTTATCACTACCAGTCTTAGCTGCTGGCATTACCATGCTCCTAACAGATCGAAACCTAAATACTTCCTTCTTCGACCCTGCAGGGGGAGGGGACCCAATTCTGTACCAACACCTG
>gi|186966703|gb|EU392244.1| Mugil cephalus isolate Mc_J cytochrome c oxidase subunit I (COI) gene, partial cds; mitochondrial
CCTCTATCTAGTATTTGGTGCCTGAGCTGGAATAGTAGGTACTGCCCTAAGCCTACTTATCCGAGCTGAACTAAGTCAACCCGGCGCTCTTCTAGGAGACGACCAGATTTACAATGTAATCGTTACAGCGCATGCTTTTGTAATAATCTTTTTTATAGTAATACCAATTATGATTGGGGGCTTCGGAAATTGATTAATTCCCCTAATAATTGGGGCACCTGACATAGCTTTTCCCCGAATAAATAATATAAGCTTCTGACTTCTTCCTCCATCATTCCTTCTCCTTCTAGCTTCTTCGGGAGTAGAAGCTGGGGCAGGAACAGGATGGACTGTTTATCCCCCATTAGCCAGCAACCTGGCCCACGCCGGAGCGTCTGTTGACCTCACTATTTTCTCCCTCCACCTTGCAGGTGTTTCCTCAATTCTAGGCGCTATTAACTTTATTACAACAATCATCAATATGAAACCTCCAGCTACTTCTCAATATCAGACACCCCTTTTCGTATGAGCTGTCCTAATTACCGCTGTACTTCTTCTTTTATCATTACCAGTCTTAGCTGCTGGCATTACCATACTCCTAACAGATCGAAACCTAA
>gi|186966705|gb|EU392245.1| Mugil cephalus isolate Mc_M cytochrome c oxidase subunit I (COI) gene, partial cds; mitochondrial
ACCCGGCGCTCTTCTAGGAGACGACCAGATTTATAATGTAATCGTTACAGCGCATGCTTTTGTAATAATCTTTTTTATAGTAATACCAATTATGATCGGGGGCTTTGGAAATTGACTAATTCCCCTAATAATTGGGGCACCTGACATAGCTTTTCCCCGAATAAATAATATGAGCTTCTGACTTCTTCCTCCATCATTCCTTCTCCTTCTAGCTTCTTCGGGAGTAGAAGCTGGGGCAGGAACAGGATGGACTGTTTATCCCCCATTAGCCAGCAACCTGGCTCACGCCGGAGCGTCTGTTGACCTTACCATTTTCTCCCTCCACCTTGCAGGTGTTTCCTCAATTTTAGGCGCTATTAACTTTATTACAACAATCATCAATATGAAACCTCCAGCTACTTCTCAATATCAAACACCCCTTTTCGTGTGAGCTGTCCTAATTACCGCTGTACTCCTTCTTTTATCACTACCAGTCTTAGCTGCTGGCATTACCATGCTCCTAACAGATCGAAACCT
>gi|186966707|gb|EU392246.1| Mugil cephalus isolate Mc_T cytochrome c oxidase subunit I (COI) gene, partial cds; mitochondrial
CCTCTATCTAGTGTTTGGTGCCTGAGCCGGAATAGTAGGTACTGCCCTAAGCCTACTCATCCGAGCTGAACTAAGTCAACCCGGCGCTCTTCTAGGAGACGACCAGATTTATAATGTAATCGTTACAGCGCATGCTTTTGTAATAATCTTTTTTATAGTCATACCAATTATGATCGGGGGCTTCGGAAATTGACTAGTTCCCTTAATAATCGGGGCACCTGACATAGCTTTTCCCCGAATAAACAATATGAGCTTCTGACTTCTTCCCCCATCATTCCTACTCCTTTTAGCTTCTTCAGGAGTAGAAGCTGGAGCGGGGACAGGATGGACTGTTTATCCCCCGTTAGCTGGCAACCTGGCTCACGCCGGAGCGTCTGTTGACCTCACCATTTTCTCCCTCCACCTTGCAGGTGTTTCCTCAATTTTAGGAGCTATTAACTTTATTACAACAATCATCAACATGAAACCTCCAGCTACTTCTCAATATCAGACACCCCTTTTCGTATGAGCTGTCCTAATTACCGCTGTACTCCTTCTTTTATCACTACCAGTCTTAGCTGCTGGCATTACCATACTCCTAACAGATCGAAACCTAAATACTTCCTTCTTCGATCCTGCAGGAGGAGGGGACCCAATTCTGTATCAACACCTG
>gi|186966709|gb|EU392247.1| Moolgarda cunnesius isolate Vc cytochrome c oxidase subunit I-like (COI) gene, partial sequence; mitochondrial
CCTCTATCTAGTATTTGGTGCCTGAGCTGGAATAGTAGGCACTGCCCTGAGCCTTCTTATTCGAGCAGAATTAAGCCAACCTGGCGCTCTCCTGGGGGACGACCAGATTTATAATGTAATCGTAACGGCTCACGCCTTCGTGATAATCTTCTTTATAGTAATACCAATCATGATTGGAGGGTTTGGAAATTGACTTGTCCCTTTAATGATTGGCGCACCAGATATAGCATTCCCCCGTATAAATAACATGAGCTTCTGACTGCTTCCCCCCTCATTCCTCCTTCTCTTAGCATCATCGGCAGTTGAAGCAGGGGCTGGGACCGGATGAACTGTCTACCCCCCTCTCGCTAGCAATTTAGCGCACGCCGGAGCATCCGTCGACCTAACCATTTTTTCCCTCCATCTGGCAGGTGTTTCCTCAATTTTAGGTGCCATTAATTTTATTACAACTATTATTAACATGAAACCCCCTGCAATCTCCCAATACCAAACCCCCCTCTTCGTATGGGCAGTTCTTATCACAGCTGTCCTTCTGCTCCTGTCCCTCCCAGTACTTGCTGCAGGGATCACGATACTCCTAACAGATCGAAACCTAAACACTTCTTTCTTCGACCCTGCCGGGGGGAGG
>gi|203284841|gb|EU715451.1| Mugil cephalus isolate 4Mcep cytochrome c oxidase subunit I (COI) gene, partial cds; mitochondrial
CTCTATCTAGTGTTTGGTGCCTGAGCCGGAATAGTAGGTACTGCCCTAAGCCTACTCATCCGAGCTGAACTAAGTCAACCTGGCGCTCTTCTAGGAGACGACCAGATTTATAATGTAATCGTTACAGCACATGCTTTTGTAATAATCTTTTTTATAGTAATACCAATCATGATCGGGGGCTTCGGAAATTGACTAGTTCCCCTAATAATCGGAGCACCTGATATAGCTTTTCCCCGAATAAATAACATAAGCTTCTGACTTCTTCCCCCATCATTCCTTCTCCTTCTAGCTTCTTCGGGAGTAGAGGCTGGGGCAGGAACAGGATGGACTGTTTATCCCCCATTAGCCAGCAACCTGGCCCACGCCGGAGCGTCTGTTGACCTCACCATTTTCTCCCTCCACCTTGCGGGGGTTTCCTCAATTTTAGGCGCTATTAACTTTATTACAACAATCATCAATATAAAACCTCCAGCTACTTCTCAATATCAGACACCCCTTTTCGTGTGAGCTGTCCTAATTACCGCTGTACTCCTTCTTTTATCATTACCAGTCTTAGCTGCTGGCATTACTATACTCCTGACAGATCGAAACCTAAATACTTCCTTCTTTGACCCTGCAGGGGGAGGGGACCCAATTCTGTATCAACACCTG
>gi|203284843|gb|EU715452.1| Mugil cephalus isolate 5Mcep cytochrome c oxidase subunit I (COI) gene, partial cds; mitochondrial
CTCTATCTAGTGTTTGGTGCCTGAGCCGGAATAGTAGGTACTGCCCTAAGCCTACTCATCCGAGCTGAACTAAGTCAACCTGGCGCTCTTCTAGGAGACGACCAGATTTATAATGTAATCGTTACAGCACATGCTTTTGTAATAATCTTTTTTATAGTAATACCAATCATGATCGGGGGCTTCGGAAATTGACTAGTTCCCCTAATAATCGGAGCACCTGATATAGCTTTTCCCCGAATAAATAACATAAGCTTCTGACTTCTTCCCCCATCATTCCTTCTTCTTCTAGCTTCTTCGGGAGTAGAGGCTGGGGCAGGAACAGGATGGACTGTTTATCCCCCATTAGCCAGCAACCTGGCCCACGCCGGAGCGTCTGTTGACCTCACCATTTTCTCCCTCCACCTTGCGGGGGTTTCCTCAATTTTAGGCGCTATTAACTTTATTACAACAATCATCAATATAAAACCTCCAGCTACTTCTCAATATCAGACACCCCTTTTCGTGTGAGCTGTCCTAATTACCGCTGTACTCCTTCTTTTATCATTACCAGTCTTAGCTGCTGGCATTACTATACTCCTGACAGATCGAAACCTAAATACTTCCTTCTTTGACCCTGCAGGGGGAGGGGACCCAATTCTGTATCAACACCTG
>gi|203284845|gb|EU715453.1| Mugil cephalus isolate 6Mcep cytochrome c oxidase subunit I (COI) gene, partial cds; mitochondrial
CTCTATCTAGTGTTTGGTGCCTGAGCCGGAATAGTAGGTACTGCCCTAAGCCTACTCATCCGAGCTGAACTAAGTCAACCTGGCGCTCTTCTAGGAGACGACCAGATTTATAATGTAATCGTTACAGCACATGCTTTTGTAATAATCTTTTTTATAGTAATACCAATCATGATCGGGGGCTTCGGAAATTGACTAGTTCCCCTAATAATCGGAGCACCTGATATAGCTTTTCCCCGAATAAATAATATAAGCTTCTGACTTCTTCCCCCATCATTCCTTCTCCTTCTAGCTTCTTCGGGAGTAGAGGCTGGGGCAGGAACAGGATGGACTGTTTATCCCCCATTAGCCAGCAACCTGGCCCACGCCGGAGCGTCTGTTGACCTCACCATTTTCTCCCTCCACCTTGCGGGGGTTTCCTCAATTTTAGGCGCTATTAACTTTATTACAACAATCATCAATATAAAACCTCCAGCTACTTCTCAATATCAGACACCCCTTTTCGTGTGAGCTGTCCTAATTACCGCTGTACTCCTTCTTTTATCATTACCAGTCTTAGCTGCTGGCATTACTATACTCCTGACAGATCGAAACCTAAATACTTCCTTCTTTGACCCTGCAGGGGGAGGGGACCCAATTCTGTATCAACACCTG
>gi|203284847|gb|EU715454.1| Mugil cephalus isolate 7Mcep cytochrome c oxidase subunit I (COI) gene, partial cds; mitochondrial
CTCTATCTAGTGTTTGGTGCCTGAGCCGGAATAGTAGGTACTGCCCTAAGCCTACTCATCCGAGCTGAACTAAGTCAACCTGGCGCTCTTCTAGGAGACGACCAGATTTATAATGTAATCGTTACAGCACATGCTTTTGTAATAATCTTTTTTATAGTAATACCAATCATGATTGGGGGCTTCGGAAATTGACTAGTTCCCCTAATAATCGGAGCACCTGATATAGCTTTTCCCCGAATAAATAACATAAGCTTCTGACTTCTTCCCCCATCATTCCTTCTCCTTCTAGCTTCTTCGGGAGTAGAGGCTGGGGCAGGAACAGGATGGACTGTTTATCCCCCATTAGCCAGCAACCTGGCCCACGCCGGAGCGTCTGTTGACCTCACCATTTTCTCCCTCCATCTTGCGGGGGTTTCCTCAATTTTAGGCGCTATTAACTTTATTACAACAATCATCAATATAAAACCTCCAGCTACTTCTCAATATCAAACACCCCTTTTCGTGTGAGCTGTCCTAATTACCGCTGTACTCCTTCTTTTATCATTACCAGTCTTAGCTGCTGGCATTACTATACTCCTGACAGATCGAAACCTAAATACTTCCTTCTTTGACCCTGCAGGGGGAGGGGACCCAATTCTGTATCAACACCTG
>gi|203284849|gb|EU715455.1| Mugil platanus isolate 8Mpl cytochrome c oxidase subunit I (COI) gene, partial cds; mitochondrial
CTCTATCTAGTGTTTGGTGCCTGAGCCGGAATAGTAGGTACTGCCCTAAGCCTACTTATCCGAGCTGAACTAAGTCAACCCGGCGCTCTTCTAGGAGACGACCAGATTTATAATGTAATCGTTACAGCGCATGCTTTTGTAATAATCTTTTTTATAGTAATACCAATTATGATTGGGGGCTTCGGAAATTGACTAGTTCCCCTAATAATTGGGGCACCTGATATAGCTTTCCCCCGAATAAATAACATGAGCTTCTGACTTCTTCCTCCATCATTCCTTCTCCTTCTAGCTTCTTCGGGAGTAGAAGCTGGGGCAGGGACAGGATGGACTGTTTATCCCCCATTAGCCAGCAACCTGGCTCACGCCGGAGCGTCTGTTGACCTCACCATTTTCTCCCTCCACCTTGCAGGTGTTTCCTCAATTTTAGGCGCTATTAACTTTATTACAACAATCATCAATATGAAACCTCCAGCTACTTCTCAATATCAGACACCCCTTTTCGTATGAGCTGTCCTAATTACCGCTGTACTCCTTCTTTTATCATTACCAGTCTTAGCTGCTGGCATTACCATACTCCTGACAGATCGAAACCTAAATACTTCCTTCTTCGACCCTGCAGGGGGAGGGGACCCAATTCTGTATCAACACCTG
>gi|203284851|gb|EU715456.1| Mugil platanus isolate 9Mpl cytochrome c oxidase subunit I (COI) gene, partial cds; mitochondrial
CTCTATCTAGTGTTTGGTGCCTGAGCCGGAATAGTAGGTACTGCCCTAAGCCTACTTATCCGAGCTGAACTAAGTCAACCCGGCGCTCTTCTAGGAGACGACCAGATTTATAATGTAATCGTTACAGCGCATGCTTTTGTAATAATCTTTTTTATAGTAATACCAATTATGATTGGGGGCTTCGGAAATTGACTAGTTCCCCTAATAATTGGGGCACCTGATATAGCTTTCCCCCGAATAAATAACATGAGCTTCTGACTTCTTCCTCCATCATTCCTCCTCCTTCTAGCTTCTTCGGGAGTAGAAGCTGGGGCAGGGACAGGATGGACTGTTTATCCCCCATTAGCCAGCAACCTGGCTCACGCCGGAGCGTCTGTTGACCTCACCATTTTCTCCCTCCACCTTGCAGGTGTTTCCTCAATTTTAGGCGCTATTAACTTTATTACAACAATCATCAATATGAAACCTCCAGCTACTTCTCAATATCAGACACCCCTTTTCGTATGAGCTGTCCTAATTACCGCTGTACTCCTTCTTTTATCATTACCAGTCTTAGCTGCTGGCATTACCATACTCCTGACAGATCGAAACCTAAATACTTCCTTCTTCGACCCTGCAGGGGGAGGGGACCCAATTCTGTATCAACACCTG
>gi|203284853|gb|EU715457.1| Mugil platanus isolate 10Mpl cytochrome c oxidase subunit I (COI) gene, partial cds; mitochondrial
CTCTATCTAGTGTTTGGTGCCTGAGCCGGAATAGTAGGTACTGCCCTAAGCCTACTTATCCGAGCTGAACTAAGTCAACCCGGCGCTCTTCTAGGAGACGACCAGATTTATAATGTAATCGTTACAGCGCATGCTTTTGTAATAATCTTTTTTATAGTAATACCAATTATGATTGGGGGCTTCGGAAATTGACTAGTTCCCCTAATAATTGGGGCACCTGATATAGCTTTCCCCCGAATAAATAACATGAGCTTCTGACTTCTTCCTCCATCATTCCTTCTCCTTCTAGCTTCTTCGGGAGTAGAAGCTGGGGCAGGGACAGGATGGACTGTTTATCCCCCATTAGCCAGCAACCTGGCTCACGCCGGAGCGTCTGTTGACCTCACCATTTTCTCCCTCCACCTTGCAGGTGTTTCCTCAATTTTAGGCGCTATTAACTTTATTACAACAATCATCAATATGAAACCTCCAGCTACTTCTCAATATCAGACACCCCTTTTCGTATGAGCTGTCCTAATTACCGCTGTACTCCTTCTTTTATCATTACCAGTCTTAGCTGCTGGCATTACCATACTTCTGACAGATCGAAACCTAAATACTTCCTTCTTCGACCCTGCAGGGGGAGGGGACCCAATTCTGTATCAACACCTG
>gi|203284855|gb|EU715458.1| Mugil platanus isolate 11Mpl cytochrome c oxidase subunit I (COI) gene, partial cds; mitochondrial
CTCTATCTAGTGTTTGGTGCCTGAGCCGGAATAGTAGGTACTGCCCTAAGCCTACTTATCCGAGCTGAACTAAGTCAACCCGGCGCTCTTCTAGGAGACGACCAGATTTATAATGTAATCGTTACAGCGCATGCTTTTGTAATAATCTTTTTTATAGTAATACCAATTATGATTGGGGGCTTCGGAAATTGACTAGTTCCCCTAATAATTGGGGCACCTGATATAGCTTTCCCCCGAATAAATAACATGAGCTTCTGACTTCTTCCTCCATCATTCCTTCTCCTTCTAGCTTCTTCGGGAGTAGAAGCTGGGGCAGGGACAGGATGGACTGTTTATCCCCCATTAGCCAGCAACCTGGCTCACGCCGGAGCGTCTGTTGACCTCACCATTTTCTCCCTCCACCTTGCAGGTGTTTCCTCAATTTTAGGCGCTATTAACTTTATTACAACAATCATCAATATGAAACCTCCAGCTACTTCTCAATACCAGACACCCCTTTTCGTATGAGCTGTCCTAATTACCGCTGTACTCCTTCTTTTATCATTACCAGTCTTAGCTGCTGGCATTACCATACTCCTGACAGATCGAAACCTAAATACTTCCTTCTTCGACCCTGCAGGGGGAGGGGACCCAATTCTGTATCAACACCTG
>gi|203284857|gb|EU715459.1| Mugil platanus isolate 12Mpl cytochrome c oxidase subunit I (COI) gene, partial cds; mitochondrial
CTCTATCTAGTGTTTGGTGCCTGAGCCGGAATAGTAGGTACTGCCCTAAGCCTACTTATCCGAGCTGAACTAAGTCAACCCGGCGCTCTTCTAGGAGACGACCAGATTTATAATGTAATCGTTACAGCGCATGCTTTTGTAATAATCTTTTTTATAGTAATACCAATTATGATTGGGGGCTTCGGAAATTGACTAGTTCCCCTAATAATTGGGGCACCTGATATAGCTTTCCCCCGAATAAATAACATGAGCTTCTGACTTCTTCCTCCATCATTCCTTCTCCTTCTAGCTTCTTCGGGAGTAGAAGCTGGGGCAGGGACAGGATGGACTGTTTATCCCCCATTAGCCAGCAACCTGGCTCACGCCGGAGCGTCTGTTGACCTCACCATTTTCTCCCTCCACCTTGCAGGTGTTTCCTCAATTTTAGGCGCTATTAACTTTATTACGACAATCATCAATATGAAACCTCCAGCTACTTCTCAATATCAGACACCCCTTTTCGTATGAGCTGTCCTAATTACCGCTGTACTCCTTCTTTTATCATTACCAGTCTTAGCTGCTGGCATTACCATACTCCTGACAGATCGAAACCTAAATACTTCCTTCTTCGACCCTGCAGGGGGAGGGGACCCAATTCTGTATCAACACCTG
>gi|203284859|gb|EU715460.1| Mugil platanus isolate 13Mpl cytochrome c oxidase subunit I (COI) gene, partial cds; mitochondrial
CTCTATCTAGTGTTTGGTGCCTGAGCCGGAATAGTAGGTACTGCCCTAAGCCTACTTATCCGAGCTGAACTAAGTCAACCCGGCGCTCTTCTAGGAGACGACCAGATTTATAATGTAATCGTTACAGCGCATGCTTTTGTAATAATCTTTTTTATAGTAATACCAATTATGATTGGGGGCTTCGGAAATTGACTAGTTCCCCTAATAATTGGGGCACCTGATATAGCTTTCCCCCGAATAAATAACATGAGCTTCTGACTTCTTCCTCCATCATTCCTTCTCCTTCTAGCTTCTTCGGGAGTAGAAGCTGGGGCAGGGACAGGATGGACTGTTTATCCCCCATTAGCCAGCAACCTGGCTCACGCCGGAGCGTCTGTTGACCTCACCATTTTCTCCCTCCACCTTGCAGGTGTTTCCTCAATTTTAGGCGCTATTAACTTTATTACAACAATCATCAATATGAAACCTCCAGCTACTTCTCAATATCAGACACCCCTTTTCGTGTGAGCTGTCCTAATTACCGCTGTACTCCTTCTTTTATCATTACCAGTCTTAGCTGCTGGCATTACCATACTCCTGACAGATCGAAACCTAAATACTTCCTTCTTCGACCCTGCAGGGGGAGGGGACCCAATTCTGTATCAACACCTG
>gi|203284861|gb|EU715461.1| Mugil platanus isolate 14Mpl cytochrome c oxidase subunit I (COI) gene, partial cds; mitochondrial
CTCTATCTAGTGTTTGGTGCCTGAGCCGGAATAGTAGGTACTGCCCTAAGCCTACTTATCCGAGCTGAACTAAGTCAACCCGGCGCTCTTCTAGGAGACGACCAGATTTATAATGTAATCGTTACAGCGCATGCTTTTGTAATAATCTTTTTTATAGTAATACCAATTATGATTGGGGGCTTCGGAAATTGACTAGTTCCCCTAATAATTGGGGCACCTGATATAGCTTTCCCCCGAATAAATAACATGAGCTTCTGACTTCTTCCTCCATCATTCCTTCTCCTTCTAGCTTCTTCGGGAGTAGAAGCTGGGGCAGGGACAGGGTGGACTGTTTATCCCCCATTAGCCAGCAACCTGGCTCACGCCGGAGCGTCTGTTGACCTCACCATTTTCTCCCTCCACCTTGCAGGTGTTTCCTCAATTTTAGGCGCTATTAACTTTATTACAACAATTATCAATATGAAACCTCCAGCTACTTCTCAATATCAGACACCCCTTTTCGTATGAGCTGTCCTAATTACCGCTGTACTCCTTCTTTTATCATTACCAGTCTTAGCTGCTGGCATTACCATACTCCTGACAGATCGAAACCTAAATACTTCCTTCTTCGACCCTGCAGGGGGAGGGGACCCAATTCTGTATCAACACCTG
>gi|203284863|gb|EU715462.1| Mugil liza isolate 15Mli cytochrome c oxidase subunit I (COI) gene, partial cds; mitochondrial
CTCTATCTAGTGTTTGGTGCCTGAGCCGGAATAGTAGGTACTGCCCTAAGCCTACTTATCCGAGCTGAACTAAGTCAACCCGGCGCTCTTCTAGGAGACGACCAGATTTATAATGTAATCGTTACAGCGCATGCTTTTGTAATAATCTTTTTTATAGTAATACCAATTATGATTGGGGGCTTCGGAAATTGACTAGTTCCCCTAATAATTGGGGCACCTGATATAGCTTTCCCCCGAATAAATAACATGAGCTTCTGACTTCTTCCTCCATCATTCCTTCTCCTTCTAGCTTCTTCGGGAGTAGAAGCTGGGGCAGGGACAGGATGGACTGTTTATCCCCCATTAGCCAGCAACCTGGCTCACGCCGGAGCGTCTGTTGACCTCACCATTTTCTCCCTCCACCTTGCAGGTGTTTCCTCAATTTTAGGCGCTATTAACTTTATTACAACAATCATCAATATGAAACCTCCAGCTACTTCTCAATATCAGACACCCCTTTTCGTATGAGCTGTCCTAATTACCGCTGTACTCCTTCTTTTATCATTACCAGTCTTAGCTGCTGGCATTACCATACTCCTAACAGATCGAAACCTAAATACTTCCTTCTTCGACCCTGCAGGGGGAGGGGACCCAATTCTGTATCAACACCTG
>gi|203284865|gb|EU715463.1| Mugil curema isolate 21Mcur cytochrome c oxidase subunit I (COI) gene, partial cds; mitochondrial
CTATATCTAGTGTTTGGTGCTTGAGCAGGGATAGTAGGGACCGCCCTAAGCCTACTTATCCGGGCCGAACTAAGCCAACCTGGCGCTCTCTTAGGAGACGATCAGATCTACAATGTAATTGTTACGGCCCACGCTTTCGTAATGATTTTCTTTATAGTGATGCCAATCATAATCGGGGGCTTCGGAAACTGATTAGTCCCCTTGATGATTGGAGCACCCGACATAGCATTCCCTCGAATAAACAACATAAGCTTCTGACTTCTACCTCCCTCATTCCTTCTCCTCCTAGCCTCTTCAGGAGTTGAGGCAGGGGCTGGGACAGGATGAACTGTTTACCCGCCATTGGCCGGCAACCTGGCTCACGCTGGGGCATCTGTTGACCTCACCATCTTCTCCCTACACCTAGCAGGTGTTTCTTCAATTCTAGGGGCTATTAACTTCATTACAACCATTCTCAACATGAAACCTCCTGCTATCTCGCAGTATCAGACACCTCTCTTTGTTTGAGCCGTTCTAATTACTGCCGTTCTCCTTCTCTTATCTCTTCCAGTCCTAGCCGCTGGCATCACTATGCTCCTAACAGACCGAAATTTAAATACTTCCTTCTTCGACCCTGCAGGAGGAGGGGACCCAATTCTGTATCAACACTTA
>gi|203284867|gb|EU715464.1| Mugil curema isolate 22Mcur cytochrome c oxidase subunit I (COI) gene, partial cds; mitochondrial
CTATATCTAGTGTTTGGTGCTTGAGCAGGGATAGTAGGGACCGCCCTAAGCCTACTTATCCGGGCCGAACTAAGCCAACCTGGCGCTCTCTTAGGAGACGATCAGATCTACAATGTAATCGTTACGGCCCACGCTTTCGTAATGATTTTCTTTATAGTGATGCCAATCATAATCGGGGGCTTCGGAAACTGATTAGTCCCCTTGATGATTGGAGCACCCGACATAGCATTCCCTCGAATAAACAACATAAGCTTCTGACTTCTACCTCCCTCATTCCTTCTCCTCCTAGCCTCTTCAGGAGTTGAAGCAGGGGCTGGGACAGGATGAACTGTTTACCCGCCATTGGCCGGCAACCTGGCTCACGCTGGGGCATCTGTTGACCTCACCATCTTCTCCCTACACCTAGCAGGTGTTTCTTCAATTCTAGGGGCTATTAACTTCATTACAACCATTCTCAACATGAAACCTCCTGCTATCTCGCAGTATCAGACACCTCTCTTTGTTTGAGCCGTTCTAATTACTGCCGTTCTCCTTCTCTTATCTCTCCCAGTCCTAGCCGCTGGCATCACTATGCTCCTAACAGACCGAAATTTAAATACTTCCTTCTTCGACCCTGCAGGAGGAGGGGACCCAATTCTGTATCAACACTTA
>gi|203284869|gb|EU715465.1| Mugil curema isolate 23Mcur cytochrome c oxidase subunit I (COI) gene, partial cds; mitochondrial
CTATATCTAGTGTTTGGTGCCTGAGCAGGTATAGTGGGTACCGCCCTAAGCCTCCTTATCCGAGCTGAACTAAGCCAGCCTGGCGCTCTTCTGGGAGACGACCAGATTTATAATGTAATTGTTACAGCCCATGCTTTCGTAATAATCTTTTTTATAGTGATACCAATCATGATCGGGGGCTTTGGAAACTGATTAATTCCCCTAATGCTGGGAGCACCCGATATGGCATTCCCTCGAATAAACAACATAAGCTTTTGACTCCTGCCCCCCTCATTCCTTCTTCTTTTAGCATCTTCAGGGGTAGAATCAGGGGCCGGAACAGGATGAACTGTTTACCCTCCCCTAGCAGGCAACCTTGCCCATGCTGGAGCATCTGTTGACCTCACCATTTTCTCCCTTCATTTAGCAGGGGTTTCTTCAATTCTAGGTGCCATCAACTTTATTACAACAATTATTAATATGAAACCCCCGGCTCTCTCCCAATACCAGACTCCCCTCTTCGTCTGAGCTGTTTTAATTACCGCTGTCCTCCTTCTCCTGTCCCTCCCTGTCCTAGCCGCCGGCATTACTATACTTTTAACAGATCGTAACCTAAACACCTCTTTCTTCGACCCTGCAGGAGGGGGAGACCCAATCCTGTACCAACACTTA
>gi|203284871|gb|EU715466.1| Liza aurata isolate 24Lau cytochrome c oxidase subunit I (COI) gene, partial cds; mitochondrial
CTTTATCTAGTATTTGGTGCCTGAGCGGGTATAGTAGGGACTGCCTTAAGCCTGCTTATCCGAGCAGAACTAAGCCAGCCTGGTGCTCTCCTAGGAGACGACCAAATTTATAATGTAATTGTTACGGCACACGCTTTCGTAATAATTTTCTTTATAGTAATGCCAATTATGATTGGAGGGTTTGGAAACTGATTAATTCCCTTAATGATCGGCGCTCCCGACATGGCCTTCCCTCGAATAAACAACATAAGCTTCTGACTTCTTCCCCCCTCATTCCTCCTTCTCTTAGCATCCTCTGGCGTAGAAGCAGGGGCAGGCACTGGGTGAACCGTATACCCTCCCCTAGCCAGCAATTTAGCACATGCTGGGGCATCCGTCGACTTAACAATCTTCTCCCTCCACCTAGCAGGTGTCTCCTCAATTTTAGGCGCTATTAACTTCATCACAACTATTATCAATATGAAACCTCCCGCGATCTCCCAATATCAGACCCCTCTATTTGTATGAGCCGTCCTTATTACCGCCGTACTTCTCCTCCTGTCTCTGCCAGTCCTTGCTGCCGGAATCACTATGCTTCTGACAGATCGAAATTTAAATACCTCTTTCTTCGACCCAGCAGGAGGGGGGAATCCCATCTTATACCAACACCTA
>gi|203284873|gb|EU715467.1| Liza aurata isolate 25Lau cytochrome c oxidase subunit I (COI) gene, partial cds; mitochondrial
CTTTATCTAGTATTTGGTGCCTGAGCGGGTATAGTAGGGACTGCCTTAAGCCTGCTTATCCGAGCAGAACTAAGCCAGCCTGGTGCTCTCCTAGGAGACGACCAAATTTATAATGTAATTGTTACGGCACACGCTTTCGTAATAATTTTCTTTATAGTAATACCAATTATGATTGGAGGGTTTGGAAACTGATTAATTCCCTTAATGATCGGCGCTCCCGACATGGCCTTCCCTCGAATAAACAACATAAGCTTCTGACTTCTTCCCCCCTCATTCCTCCTTCTCTTAGCATCCTCTGGCGTAGAAGCAGGGGCAGGCACTGGGTGAACCGTATACCCTCCCCTAGCCAGCAATTTAGCACATGCTGGGGCATCCGTCGACTTAACAATCTTCTCCCTCCACCTAGCAGGTGTCTCCTCAATTTTAGGCGCTATTAACTTCATCACAACTATTATCAATATGAAACCTCCCGCGATCTCCCAATATCAGACCCCTCTATTTGTATGAGCCGTCCTTATTACCGCCGTACTTCTCCTCCTGTCTCTGCCAGTCCTTGCTGCCGGAATCACTATGCTTCTGACAGATCGAAATTTAAATACCTCTTTCTTCGACCCAGCGGGAGGGGGGAATCCCATCTTATACCAACACCTA
>gi|203284875|gb|EU715468.1| Liza aurata isolate 26Lau cytochrome c oxidase subunit I (COI) gene, partial cds; mitochondrial
CTTTATCTAGTATTTGGTGCCTGAGCGGGTATAGTAGGGACTGCCTTAAGCCTGCTTATCCGAGCAGAACTAAGCCAGCCTGGTGCTCTCCTAGGAGACGACCAAATTTATAATGTAATTGTTACGGCACACGCTTTCGTAATAATTTTCTTTATAGTAATACCAATTATGATTGGAGGGTTTGGAAACTGATTAATTCCCTTAATGATCGGCGCTCCCGACATGGCCTTCCCTCGAATAAACAACATAAGCTTCTGACTTCTTCCCCCCTCATTCCTCCTTCTCTTAGCATCCTCTGGCGTAGAAGCAGGGGCAGGCACTGGGTGAACCGTATACCCTCCCCTAGCCAGCAATTTAGCACATGCTGGGGCATCCGTCGACTTAACAATCTTCTCCCTCCACCTAGCAGGTGTCTCCTCAATTTTAGGCGCTATTAACTTCATCACAACTATTATCAATATGAAACCTCCCGCGATCTCCCAATATCAGACCCCTCTATTTGTATGAGCCGTCCTTATTACCGCCGTACTTCTCCTCCTGTCTCTGCCAGTCCTTGCTGCCGGAATCACTATGCTTCTGACAGATCGAAATTTAAATACCTCTTTCTTCGACCCAGCAGGAGGGGGGAATCCCATCTTATACCAACACCTA
>gi|203284877|gb|EU715469.1| Liza ramado isolate 27Lra cytochrome c oxidase subunit I (COI) gene, partial cds; mitochondrial
CTTTATCTAGTATTTGGTGCCTGAGCGGGTATAGTAGGGACTGCCTTAAGCCTGCTTATCCGAGCAGAACTAAGCCAACCTGGCGCTCTCCTGGGAGACGACCAGATTTACAATGTAATTGTTACGGCACACGCTTTCGTAATAATTTTCTTTATAGTAATACCAATTATGATTGGAGGGTTTGGAAACTGACTAGTCCCCTTAATGATCGGCGCCCCCGACATGGCCTTTCCTCGAATAAACAACATAAGCTTCTGACTTCTCCCCCCTTCATTCCTCCTCCTTCTAGCATCCTCTGGCGTAGAAGCAGGGGCAGGCACTGGATGGACCGTGTACCCTCCCCTGGCCAGCAATTTAGCACATGCCGGGGCATCCGTCGACCTGACAATCTTTTCCCTTCACCTAGCAGGTGTCTCTTCAATTTTAGGTGCTATTAACTTCATCACAACCATTATCAATATGAAACCTCCTGCGATCTCCCAATATCAAACCCCCCTATTTGTGTGAGCCGTCCTTATCACCGCCGTCCTTCTCCTTTTATCCCTCCCAGTCCTTGCTGCCGGGATCACTATGCTCCTTACAGATCGAAACTTAAACACCTCTTTCTTCGATCCGGCGGGAGGAGGGAACCCCATCCTATATCAACATCTA
>gi|203284879|gb|EU715470.1| Chelon saliens isolate 28Lsal cytochrome c oxidase subunit I (COI) gene, partial cds; mitochondrial
CTTTATCTAGTATTTGGTGCCTGAGCGGGTATAGTAGGGACCGCCTTAAGCCTACTTATCCGAGCAGAACTAAGCCAACCTGGTGCTCTCTTAGGAGACGACCAGATTTACAATGTTATTGTTACGGCACATGCTTTCGTAATAATTTTCTTTATAGTAATACCAATTATGATTGGAGGGTTTGGAAACTGACTAGTCCCCTTAATGATCGGCGCCCCCGACATGGCCTTCCCTCGAATGAACAACATAAGCTTTTGACTTCTTCCCCCCTCATTCCTTCTTCTCTTAGCATCCTCTGGCGTAGAAGCAGGAGCAGGTACTGGATGAACCGTTTACCCTCCCCTCGCCAGCAATTTAGCACATGCTGGGGCATCCGTCGACTTAACAATCTTCTCCCTCCACCTAGCAGGTGTCTCCTCAATTTTAGGTGCTATTAACTTCATCACAACTATTATTAACATAAAACCCCCCGCAATTTCCCAGTATCAGACCCCTCTATTTGTGTGAGCCGTCCTTATTACCGCCGTCCTTCTCCTCTTATCTCTGCCAGTTCTTGCTGCCGGAATCACGATGCTCCTGACAGACCGGAATTTAAACACCTCTTTCTTCGACCCAGCAGGAGGAGGGAATCCGATCCTATACCAACACCTA
>gi|203284881|gb|EU715471.1| Chelon saliens isolate 29Lsal cytochrome c oxidase subunit I (COI) gene, partial cds; mitochondrial
CTTTATCTAGTATTTGGTGCCTGAGCGGGTATAGTAGGGACCGCCTTAAGCCTACTTATCCGAGCAGAACTAAGCCAACCTGGTGCTCTCTTAGGAGACGACCAGATTTACAATGTTATTGTTACGGCACATGCTTTCGTAATAATTTTCTTTATAGTAATACCAATTATGATTGGAGGGTTCGGAAACTGACTAGTCCCCTTAATGATCGGCGCCCCCGACATGGCCTTCCCTCGAATGAACAACATAAGCTTTTGACTTCTTCCCCCCTCATTCCTTCTTCTCTTAGCATCCTCTGGCGTAGAAGCAGGAGCAGGTACTGGATGAACCGTTTACCCTCCCCTCGCCAGCAATTTAGCACATGCTGGGGCATCCGTCGACTTAACAATCTTCTCCCTCCACCTAGCAGGTGTCTCCTCAATTTTAGGTGCTATTAACTTCATCACAACTATTATTAACATAAAACCCCCCGCAATTTCCCAGTATCAGACCCCTCTATTTGTGTGAGCCGTCCTTATTACCGCCGTCCTTCTCCTCTTATCTCTGCCAGTTCTTGCTGCCGGAATCACGATGCTCCTGACAGACCGGAATTTAAACACCTCTTTCTTCGACCCAGCAGGAGGAGGGAATCCGATCCTATACCAACACCTA
>gi|203284883|gb|EU715472.1| Chelon labrosus isolate 30Chl cytochrome c oxidase subunit I (COI) gene, partial cds; mitochondrial
CTTTATCTAGTATTCGGTGCCTGAGCGGGTATAGTAGGGACTGCCCTAAGCCTGCTTATCCGAGCAGAACTAAGCCAACCCGGTGCTCTCCTAGGAGACGACCAAATTTATAATGTAATTGTTACGGCACACGCTTTCGTAATAATTTTCTTTATAGTAATACCAATTATGATTGGAGGGTTTGGAAACTGACTAGTCCCCTTAATGATCGGTGCCCCCGACATAGCCTTCCCTCGAATAAACAACATAAGCTTTTGACTCCTTCCCCCTTCATTTCTTCTTCTCTTAGCATCCTCTGGCGTAGAAGCAGGAGCAGGTACTGGATGAACCGTATACCCTCCCCTAGCCAGCAATTTAGCGCATGCCGGGGCATCCGTCGACCTAACAATCTTCTCCCTCCACCTAGCAGGTGTCTCCTCAATTTTAGGTGCTATTAACTTCATCACAACTATTATCAACATGAAACCTCCCGCGATCTCCCAATATCAGACCCCTCTGTTCGTGTGAGCCGTCCTTATCACCGCCGTCCTTCTCCTCTTATCTCTGCCAGTTCTTGCTGCCGGAATCACCATGCTCCTAACAGATCGGAACTTAAATACCTCTTTCTTCGACCCAGCGGGAGGAGGGAATCCCATCTTGTACCAACACCTA
>gi|203284885|gb|EU715473.1| Chelon labrosus isolate 31CHl cytochrome c oxidase subunit I (COI) gene, partial cds; mitochondrial
CTTTATCTAGTATTCGGTGCCTGAGCGGGTATAGTAGGGACTGCCCTAAGCCTGCTTATCCGAGCAGAACTAAGCCAACCCGGTGCTCTCCTAGGAGACGACCAAATTTATAATGTAATTGTTACGGCACACGCTTTCGTAATAATTTTCTTTATAGTAATACCAATTATGATTGGAGGGTTTGGAAACTGACTAGTCCCCTTAATGATCGGTGCCCCCGACATAGCCTTCCCTCGAATAAACAACATAAGCTTTTGACTCCTTCCCCCTTCATTTCTTCTTCTCTTAGCATCCTCTGGCGTAGAAGCAGGAGCAGGTACTGGATGAACCGTATACCCTCCCCTAGCCAGCAATTTAGCGCATGCCGGGGCATCCGTCGACCTAACAATCTTCTCCCTCCACCTAGCAGGTGTCTCCTCAATTTTAGGTGCTATTAACTTCATCACAACTATTATCAACATGAAACCTCCCGCGATCTCCCAATATCAGACCCCTCTGTTCGTGTGAGCCGTCCTTATCACCGCCGTCCTTCTCCTCTTATCTCTGCCGGTTCTTGCTGCCGGAATCACCATGCTCCTAACAGATCGGAACTTAAATACCTCTTTCTTCGACCCAGCGGGAGGAGGGAATCCCATCTTGTACCAACACCTA
>gi|203284887|gb|EU715474.1| Chelon labrosus isolate 32Chl cytochrome c oxidase subunit I (COI) gene, partial cds; mitochondrial
CTTTATCTAGTATTCGGTGCCTGAGCGGGTATAGTAGGGACTGCCCTAAGCCTGCTTATCCGAGCAGAACTAAGCCAACCCGGTGCTCTCCTAGGAGACGACCAAATTTATAATGTAATTGTTACGGCACACGCTTTCGTAATAATTTTCTTTATAGTAATACCAATTATGATTGGAGGGTTTGGAAACTGACTAGTCCCCTTAATGATCGGTGCCCCCGACATAGCCTTCCCTCGAATAAACAACATAAGCTTTTGACTCCTTCCCCCTTCATTTCTTCTTCTCTTAGCATCCTCTGGCGTAGAAGCAGGAGCAGGTACTGGATGAACCGTATACCCTCCCCTAGCCAGCAATTTAGCGCATGCCGGGGCATCCGTCGACCTAACAATCTTCTCCCTCCACCTAGCAGGTGTCTCCTCAATTTTAGGTGCTATTAACTTCATCACAACTATTATCAACATGAAACCTCCCGCGATCTCCCAATATCAGACCCCTCTGTTCGTGTGAGCCGTCCTTATCACCGCTGTCCTTCTCCTCTTATCTCTGCCAGTTCTTGCTGCCGGAATCACCATGCTCCTAACAGATCGGAACTTAAATACCTCTTTCTTCGACCCAGCGGGAGGAGGGAATCCCATCTTGTACCAACACCTA
>gi|332886551|gb|HM208823.1| Liza bandialensis haplotype 2Cba cytochrome oxidase subunit I (COI) gene, partial cds; mitochondrial
CTTAAGCCTGCTTATCCGAGCAGAACTAAGCCAACCTGGTGCTCTCCTAGGGGACGACCAGATTTACAATGTAATTGTTACGGCACACGCTTTCGTAATAATTTTCTTTATAGTAATACCAATTATGATCGGAGGGTTTGGAAACTGACTAGTCCCCCTAATGATCGGCGCCCCCGACATGGCCTTCCCTCGAATGAACAACATAAGCTTCTGACTTCTTCCCCCCTCATTCCTTCTTCTCTTAGCATCCTCCGGCGTAGAAGCAGGAGCAGGGACCGGATGGACCGTATACCCTCCTCTCGCCAGCAATTTAGCACATGCCGGAGCATCCGTCGACCTAACAATCTTCTCCCTCCACCTAGCAGGTGTCTCCTCAATTTTAGGCGCTATTAACTTCATCACCACCATCATCAACATAAAACCTCCTGCAATTTCCCAATACCAGACCCCTCTATTTGTATGAGCCGTCCTTATTACCGCTGTTCTCCTCCTCTTATCTCTGCCAGTTCTTGCTGCCGGGATCACTATGCTCCTAACAGACCGAAATTTAAATACCTCTTTCTTTGATCCTGCAGGAGGAGGGGATCCTATCTTATACCAACACCT
>gi|332886553|gb|HM208824.1| Liza bandialensis haplotype 3Cba cytochrome oxidase subunit I (COI) gene, partial cds; mitochondrial
CTTAAGCCTGCTTATCCGAGCAGAACTAAGCCAACCTGGTGCTCTCCTAGGGGACGACCAGATTTACAATGTAATTGTTACGGCACACGCTTTCGTAATAATTTTCTTTATAGTAATACCAATTATGATCGGAGGGTTTGGAAACTGACTAGTCCCCCTAATGATCGGCGCCCCCGACATGGCCTTCCCTCGAATGAACAACATAAGCTTCTGACTTCTTCCCCCCTCATTCCTTCTTCTCTTAGCATCCTCCGGCGTAGAAGCAGGAGCAGGAACCGGATGGACCGTATACCCTCCTCTCGCCAGCAATTTAGCACATGCCGGAGCATCCGTCGACCTAACAATCTTCTCCCTCCACCTAGCAGGTGTCTCCTCAATTTTAGGCGCTATTAACTTCATCACCACCATCATCAACATAAAACCTCCTGCAATTTCCCAATACCAGACCCCTCTATTTGTATGAGCCGTCCTTATTACCGCTGTTCTCCTCCTCTTATCTCTGCCAGTTCTTGCTGCCGGGATCACTATGCTCCTAACAGACCGGAATTTAAATACCTCTTTCTTTGATCCTGCAGGAGGAGGGGATCCTATCTTATACCAACACCT
>gi|332886555|gb|HM208825.1| Liza bandialensis haplotype 6Cba cytochrome oxidase subunit I (COI) gene, partial cds; mitochondrial
CTTAAGCCTGCTTATCCGAGCAGAACTAAGCCAACCTGGTGCTCTCCTAGGGGACGACCAGATTTACAATGTAATTGTTACGGCACACGCTTTCGTAATAATTTTCTTTATAGTAATACCAATTATGATCGGAGGGTTTGGAAACTGACTAGTCCCCCTAATGATCGGCGCCCCCGACATGGCCTTCCCTCGAATGAACAACATAAGCTTCTGACTTCTTCCCCCCTCATTCCTTCTTCTCTTAGCATCCTCTGGCGTAGAAGCAGGAGCAGGAACCGGATGGACCGTATACCCTCCTCTCGCCAGCAATTTAGCACATGCCGGAGCATCCGTCGACCTAACAATCTTCTCCCTCCACCTAGCAGGTGTCTCCTCAATTTTAGGCGCTATTAACTTCATCACCACCATCATCAACATAAAACCTCCTGCAATTTCCCAATACCAGACCCCTCTATTTGTATGAGCCGTCCTTATTACCGCTGTTCTCCTCCTCTTATCTCTGCCAGTTCTTGCTGCCGGGATCACTATGCTCCTAACAGACCGGAATTTAAATACCTCTTTCTTTGATCCTGCAGGAGGAGGGGATCCTATCTTATACCAACACCT
>gi|332886557|gb|HM208826.1| Liza dumerili haplotype 8Ldu cytochrome oxidase subunit I (COI) gene, partial cds; mitochondrial
CTTAAGCCTGCTTATCCGTGCCGAGCTTAGCCAACCTGGTGCTCTCCTGGGGGACGACCAGATTTATAATGTAATCGTTACAGCACATGCTTTCGTAATAATCTTCTTTATAGTAATACCAATCATGATTGGAGGCTTTGGGAACTGACTAGTCCCCCTAATGATCGGCGCCCCCGACATGGCCTTCCCTCGAATGAACAACATAAGCTTTTGACTTCTTCCCCCCTCGTTCCTTCTCCTCTTAGCATCCTCCGGCGTAGAAGCAGGAGCAGGTACTGGATGAACCGTATACCCTCCACTCGCTAGCAATTTAGCCCACGCTGGAGCATCCGTTGACCTAACAATCTTCTCCCTCCACCTAGCAGGTGTCTCCTCAATTTTAGGTGCTATTAACTTTATCACTACCATCATCAACATAAAACCTCCCGCGATCTCCCAATATCAAACCCCTCTATTTGTATGAGCCGTCCTTATTACCGCTGTCCTTCTCCTACTATCTCTCCCAGTTCTTGCCGCCGGAATCACCATGCTTCTGACAGACCGAAATTTAAACACCTCTTTCTTCGACCCAGCAGGAGGAGGAGACCCTATCTTATATCAACACCT
>gi|332886559|gb|HM208827.1| Liza dumerili haplotype 9Ldu cytochrome oxidase subunit I (COI) gene, partial cds; mitochondrial
CTTAAGCCTGCTTATCCGTGCCGAGCTTAGCCAACCTGGTGCTCTCCTGGGGGACGACCAGATTTATAATGTAATCGTTACAGCACATGCTTTCGTAATAATCTTCTTTATAGTAATACCAATCATGATTGGAGGCTTTGGGAACTGACTAGTCCCCCTAATGATCGGCGCCCCCGACATGGCCTTCCCTCGAATGAACAACATAAGCTTTTGACTTCTTCCCCCCTCGTTCCTTCTCCTCTTAGCATCCTCCGGCGTARAAGCAGGAGCAGGTACTGGATGAACCGTATACCCTCCACTCGCTAGCAATTTAGCCCACGCTGGAGCATCCGTTGACCTAACAATCTTCTCCCTCCACCTAGCAGGTGTCTCCTCAATTTTAGGTGCTATTAACTTTATCACTACCATCATCAACATAAAACCTCCCGCGATCTCCCAATATCAAACCCCTCTATTTGTATGAGCCGTCCTTATTACCGCTGTCCTTCTCCTACTATCCCTCCCAGTTCTTGCCGCCGGAATCACCATGCTTCTGACAGACCGAAATTTAAACACCTCTTTCTTCGACCCAGCAGGAGGAGGAGACCCTATCTTATATCAACACCT
>gi|332886561|gb|HM208828.1| Neochelon falcipinnis haplotype 19Lfa cytochrome oxidase subunit I (COI) gene, partial cds; mitochondrial
ACTGAGCCTACTTATCCGAGCAGAACTAAGTCAACCTGGCGCTCTCCTAGGGGACGACCAGATCTACAACGTCATCGTTACAGCTCATGCTTTCGTAATAATTTTCTTTATAGTAATACCAATTATGATCGGAGGGTTCGGAAACTGACTCGTCCCCTTAATGATTGGTGCGCCTGACATGGCATTCCCTCGAATGAATAACATAAGCTTCTGACTTCTCCCTCCCTCATTCCTTCTTCTACTGGCCTCTTCCGGAGTTGAAGCAGGGGCAGGAACAGGCTGAACTGTCTACCCTCCTCTAGCCGGCAATCTAGCACACGCTGGAGCATCCGTTGATTTAACTATTTTCTCCCTCCATTTAGCAGGTGTTTCCTCAATTTTAGGTGCCATCAACTTTATCACAACTATCATCAACATGAAACCTCCTGGAATCTCCCAATATCAGACACCCCTCTTCGTATGAGCTGTCTTAATTACAGCTGTGCTTCTCCTACTTTCCCTACCTGTCCTAGCTGCTGGCATTACTATGCTTCTCACAGATCGAAACCTAAACACCTCTTTCTTTGATCCTGCCGGGGGAGGGGACCCCATTCTGTACCAACATCT
>gi|332886563|gb|HM208829.1| Neochelon falcipinnis haplotype 22Lfa cytochrome oxidase subunit I (COI) gene, partial cds; mitochondrial
ACTGAGCCTACTTATCCGAGCAGAACTAAGTCAACCTGGCGCTCTCCTAGGGGACGACCAGATCTACAACGTCATCGTTACAGCTCATGCTTTCGTAATAATTTTCTTTATAGTAATACCAATTATGATCGGAGGGTTCGGAAACTGACTCGTCCCCTTAATGATTGGTGCGCCTGACATGGCATTCCCTCGAATGAATAACATAAGCTTCTGACTTCTCCCTCCCTCATTCCTTCTTCTACTGGCCTCTTCCGGAGTTGAAGCAGGGGCAGGAACAGGCTGAACTGTCTACCCCCCTCTAGCCGGCAATCTAGCACACGCTGGAGCATCCGTTGATTTAACTATTTTCTCCCTCCATTTAGCAGGTGTTTCCTCAATTTTAGGTGCCATCAACTTTATCACAACTATCATCAACATGAAACCTCCTGGAATCTCCCAATATCAGACACCCCTCTTCGTATGAGCTGTCTTAATTACAGCTGTGCTTCTCCTACTTTCCCTACCTGTCCTAGCTGCTGGCATTACTATGCTTCTCACAGATCGAAACCTAAACACCTCTTTCTTTGATCCTGCCGGGGGAGGGGACCCCATTCTGTACCAACATCT
>gi|332886565|gb|HM208830.1| Neochelon falcipinnis haplotype 26Lfa cytochrome oxidase subunit I (COI) gene, partial cds; mitochondrial
ACTGAGCCTACTTATCCGAGCAGAACTAAGTCAACCTGGCGCTCTCCTAGGGGACGACCAGATCTACAACGTCATCGTTACAGCTCATGCTTTCGTAATAATTTTCTTTATAGTAATACCAATTATGATCGGAGGGTTCGGAAACTGACTCGTCCCCTTAATGATTGGTGCGCCTGACATGGCATTCCCTCGAATGAATAACATAAGCTTCTGACTTCTCCCTCCCTCATTCCTTCTTCTACTGGCCTCTTCCGGAGTTGAAGCAGGGGCAGGAACAGGCTGAACTGTCTACCCCCCTCTAGCCGGCAATCTAGCACACGCTGGAGCATCCGTTGATTTAACTATTTTCTCCCTCCATTTAGCAGGTGTTTCCTCAATTTTAGGTGCCATCAACTTTATCACAACTATCATCAACATGAAACCTCCTGGAATCTCCCAATATCAGACACCCCTCTTCGTATGAGCTGTCTTAATTACAGCTGTACTTCTCCTACTTTCCCTACCTGTCCTAGCTGCTGGCATTACTATGCTTCTCACAGATCGAAACCTAAACACCTCTTTCTTTGATCCTGCCGGAGGAGGGGACCCCATTCTGTACCAACATCT
>gi|332886567|gb|HM208831.1| Parachelon grandisquamis haplotype 27Lgr cytochrome oxidase subunit I (COI) gene, partial cds; mitochondrial
TCTAAGCCTACTTATTCGAGCAGAACTAAGCCAACCTGGCGCTCTCCTAGGAGATGATCAAATTTATAATGTCATCGTTACGGCACACGCTTTTGTAATAATTTTCTTTATAGTAATACCAATCATAATCGGAGGGTTTGGAAACTGATTAGTCCCATTAATAATCGGCGCCCCCGACATGGCCTTCCCCCGAATAAATAACATAAGCTTCTGGCTTCTTCCCCCTTCATTCCTCCTTCTCCTAGCATCCTCCGGTGTAGAAGCCGGAGCGGGCACTGGATGAACGGTTTATCCTCCCTTAGCTAGCAATCTGGCACATGCTGGGGCGTCCGTTGACTTAACAATCTTTTCCCTCCACCTAGCAGGTGTCTCCTCTATTCTAGGTGCTATCAACTTCATCACAACTATTATTAACATGAAACCTCCTGCAATTTCCCAATATCAAACACCCCTATTTGTCTGAGCCGTTCTTATTACTGCCGTCCTTCTTCTCCTATCCCTACCAGTTCTTGCTGCCGGAATTACTATACTCCTGACAGACCGAAATTTAAACACCTCTTTCTTTGACCCAGCAGGAGGAGGAGATCCTATCCTTTACCAACATCT
>gi|332886569|gb|HM208832.1| Parachelon grandisquamis haplotype 29Lgr cytochrome oxidase subunit I (COI) gene, partial cds; mitochondrial
TCTAAGCCTACTTATTCGAGCAGAACTAAGCCAACCTGGCGCTCTCCTAGGAGATGATCAAATTTATAATGTCATCGTTACGGCACACGCTTTTGTAATAATTTTCTTTATAGTAATACCAATCATAATCGGAGGGTTTGGAAACTGATTAGTCCCATTAATAATCGGCGCCCCCGACATGGCCTTCCCCCGAATAAATAACATAAGCTTCTGGCTTCTTCCCCCTTCATTCCTCCTTCTCCTAGCATCCTCCGGTGTAGAAGCCGGAGCGGGCACTGGATGAACGGTTTATCCTCCCTTAGCTAGCAATCTGGCACATGCTGGGGCGTCCGTTGACTTAACAATCTTTTCCCTCCACCTAGCAGGTGTCTCCTCTATTCTAGGTGCTATCAACTTCATCACAACTATTATTAACATGAAACCTCCTGCAATTTCCCAATATCAAACACCCCTATTTGTCTGAGCCGTTCTTATTACTGCCGTCCTTCTTCTCCTTTCCCTACCAGTTCTTGCTGCCGGAATTACTATACTCCTGACAGACCGAAATTTAAACACCTCTTTCTTTGACCCAGCAGGAGGAGGAGATCCTATCCTTTACCAACATCT
>gi|332886571|gb|HM208833.1| Chelon saliens haplotype Ls cytochrome oxidase subunit I (COI) gene, partial cds; mitochondrial
CTTAAGCCTACTTATCCGAGCAGAACTAAGCCAACCTGGTGCTCTCTTAGGAGACGACCAGATTTACAATGTTATTGTTACGGCACATGCTTTCGTAATAATTTTCTTTATAGTAATACCAATTATGATTGGAGGGTTCGGAAACTGACTAGTCCCCTTAATGATCGGCGCCCCCGACATGGCCTTCCCTCGAATGAACAACATAAGCTTTTGACTTCTTCCCCCCTCATTCCTTCTTCTCTTAGCATCCTCTGGCGTARAAGCAGGAGCAGGTACTGGATGAACCGTTTACCCTCCCCTCGCCAGCAATTTAGCACATGCTGGGGCATCCGTCGACTTAACAATCTTCTCCCTCCACCTAGCAGGTGTCTCCTCAATTTTAGGTGCTATTAACTTCATCACAACTATTATTAACATAAAACCCCCCGCAATTTCCCAGTATCAGACCCCTCTATTTGTGTGAGCCGTCCTTATTACCGCCGTCCTTCTCCTCTTATCTCTGCCAGTTCTTGCTGCCGGAATCACGATGCTCCTGACAGACCGGAATTTAAACACCTCTTTCTTCGACCCAGCAGGAGGAGGGGATCCGATCCTATACCAACACCT
>gi|332886573|gb|HM208834.1| Liza ramado haplotype 38La cytochrome oxidase subunit I (COI) gene, partial cds; mitochondrial
CTTAAGCCTGCTTATCCGAGCAGAACTAAGCCAGCCTGGTGCTCTCCTAGGAGACGACCAAATTTATAATGTAATTGTTACGGCACACGCTTTCGTAATAATTTTCTTTATAGTAATACCAATTATGATTGGAGGGTTTGGAAACTGATTAATTCCCTTAATGATCGGCGCTCCCGACATGGCCTTCCCTCGAATAAACAACATAAGCTTCTGACTTCTTCCCCCCTCATTCCTCCTTCTCTTAGCATCCTCTGGCGTAGAAGCAGGGGCAGGCACTGGGTGAACCGTATACCCTCCCCTAGCCAGCAATTTAGCACATGCTGGGGCATCCGTCGACTTAACAATCTTCTCCCTCCACCTAGCAGGTGTCTCCTCAATTTTAGGCGCTATTAACTTCATCACAACTATTATCAATATGAAACCTCCCGCGATCTCCCAATATCAGACCCCTCTATTTGTATGAGCCGTCCTTATTACCGCCGTACTTCTCCTCCTGTCTCTGCCAGTCCTTGCTGCCGGAATCACTATGCTTCTGACAGATCGAAATTTAAATACCTCTTTCTTCGACCCAGCAGGAGGGGGAGATCCCATCTTATACCAACACCT
>gi|332886575|gb|HM208835.1| Liza aurata haplotype 41La cytochrome oxidase subunit I (COI) gene, partial cds; mitochondrial
CTTAGGCCTGCTTATCCGAGCAGAACTAAGCCAGCCTGGTGCTCTCCTAGGAGACGACCAAATTTATAATGTAATTGTTACGGCACACGCTTTCGTAATAATTTTCTTTATAGTAATGCCAATTATGATTGGAGGGTTTGGAAACTGATTAATTCCCTTAATGATCGGCGCTCCCGACATGGCCTTCCCTCGAATAAACAACATAAGCTTCTGACTTCTTCCCCCCTCATTCCTCCTTCTCTTAGCATCCTCTGGCGTAGAAGCAGGGGCAGGCACTGGGTGAACCGTATACCCTCCCCTAGCCAGCAATTTAGCACATGCTGGGGCATCCGTCGACTTAACAATCTTCTCCCTCCACCTAGCAGGTGTCTCCTCAATTTTAGGCGCTATTAACTTCATCACAACTATTATCAATATGAAACCTCCCGCGATCTCCCAATATCAGACCCCTCTATTTGTATGAGCCGTCCTTATTACCGCCGTACTTCTCCTCCTGTCTCTGCCAGTCCTTGCTGCCGGAATCACTATGCTTCTGACAGATCGAAATTTAAATACCTCTTTCTTCGACCCAGCAGGAGGGGGAGATCCCATCTTATACCAACACCT
>gi|332886577|gb|HM208836.1| Liza aurata haplotype 43La cytochrome oxidase subunit I (COI) gene, partial cds; mitochondrial
CTTAAGCCTGCTTATCCGAGCAGAACTAAGCCAGCCTGGTGCTCTCCTAGGAGACGACCAAATTTATAATGTAATTGTTACGGCACACGCTTTCGTAATAATTTTCTTTATAGTAATGCCAATTATGATTGGAGGGTTTGGAAACTGATTAATTCCCTTAATGATCGGCGCTCCCGACATGGCCTTCCCTCGAATAAACAACATAAGCTTCTGACTTCTTCCCCCCTCATTCCTCCTTCTCTTAGCATCCTCTGGCGTAGAAGCAGGGGCAGGCACTGGGTGAACCGTATACCCTCCCCTAGCCAGCAATTTAGCACATGCTGGGGCATCCGTCGACTTAACAATCTTCTCCCTCCACCTAGCAGGTGTCTCCTCAATTTTAGGCGCTATTAACTTCATCACAACTATTATCAATATGAAACCTCCCGCGATCTCCCAATATCAGACCCCTCTATTTGTATGAGCCGTCCTTATTACCGCCGTACTTCTCCTCCTGTCTCTGCCAGTCCTTGCTGCCGGAATCACTATGCTTCTGACAGATCGAAATTTAAATACCTCTTTCTTCGACCCAGCAGGAGGGGGAGATCCCATCTTATACCAACACCT
>gi|332886579|gb|HM208837.1| Chelon labrosus haplotype 45Cla cytochrome oxidase subunit I (COI) gene, partial cds; mitochondrial
CCTAAGCCTGCTTATCCGAGCAGAACTAAGCCAACCCGGTGCTCTCCTAGGAGACGACCAAATTTATAATGTAATTGTTACGGCACACGCTTTCGTAATAATTTTCTTTATAGTAATACCAATTATGATTGGAGGGTTTGGAAACTGACTAGTCCCCTTAATGATCGGTGCCCCCGACATAGCCTTCCCTCGAATAAACAACATAAGCTTTTGACTCCTTCCCCCTTCATTTCTTCTTCTCTTAGCATCCTCTGGCGTAGAAGCAGGAGCAGGTACTGGATGAACCGTATACCCTCCCCTAGCCAGCAATTTAGCGCATGCCGGGGCATCCGTCGACCTAACAATCTTCTCCCTCCACCTAGCAGGTGTCTCCTCAATTTTAGGTGCTATTAACTTCATCACAACTATTATCAACATGAAACCTCCCGCGATCTCCCAATATCAGACCCCTCTGTTCGTGTGAGCCGTCCTTATCACCGCCGTCCTTCTCCTCTTATCTCTGCCAGTTCTTGCTGCCGGAATCACCATGCTCCTAACAGATCGGAACTTAAATACCTCTTTCTTCGACCCAGCGGGAGGAGGAGATCCCATCTTGTACCAACACCT
>gi|332886581|gb|HM208838.1| Chelon labrosus haplotype 46Cla cytochrome oxidase subunit I (COI) gene, partial cds; mitochondrial
CCTAAGCCTGCTTATCCGAGCAGAACTAAGCCAACCCGGTGCTCTCCTAGGAGACGACCAAATTTATAATGTAATTGTTACGGCACACGCTTTCGTAATAATTTTCTTTATAGTAATACCAATTATGATTGGAGGGTTTGGAAACTGACTAGTCCCCTTAATGATCGGTGCCCCCGACATAGCCTTCCCTCGAATAAACAACATAAGCTTTTGACTCCTTCCCCCTTCATTTCTTCTTCTCTTAGCATCCTCTGGCGTARAAGCAGGAGCAGGTACTGGATGAACCGTATACCCTCCCCTAGCCAGCAATTTAGCGCATGCCGGGGCATCCGTCGACCTAACAATCTTCTCCCTCCACCTAGCAGGTGTCTCCTCAATTTTAGGTGCTATTAACTTCATCACAACTATTATCAACATGAAACCTCCCGCGATCTCCCAATATCARACCCCTCTGTTCGTGTGAGCCGTCCTTATCACCGCTGTCCTTCTCCTCTTATCTCTGCCAGTTCTTGCTGCCGGAATCACCATGCTCCTAACAGATCGGAACTTAAATACCTCTTTCTTCGACCCAGCGGGAGGAGGAGATCCCATCTTGTACCAACACCT
>gi|332886583|gb|HM208839.1| Liza ramado haplotype 50Lra cytochrome oxidase subunit I (COI) gene, partial cds; mitochondrial
CTTAAGCCTGCTTATCCGAGCAGAATTAAGCCAACCTGGCGCTCTCCTGGGAGACGACCAGATTTACAATGTAATTGTTACGGCACACGCTTTCGTAATAATTTTCTTTATAGTAATACCAATTATGATTGGAGGGTTTGGAAACTGACTAGTCCCCTTAATGATCGGCGCCCCCGACATGGCCTTTCCTCGAATAAACAACATAAGCTTCTGACTTCTCCCCCCTTCATTCCTCCTCCTTCTAGCATCCTCTGGCGTAGAAGCAGGGGCAGGCACTGGATGGACCGTGTACCCTCCCCTGGCCAGCAATTTAGCACATGCCGGGGCATCCGTCGACCTGACAATCTTTTCCCTTCACCTAGCAGGTGTCTCTTCAATTTTAGGTGCTATTAACTTCATCACAACCATTATCAATATGAAACCTCCCGCGATCTCCCAATATCAAACCCCCCTATTTGTGTGAGCCGTCCTTATCACCGCCGTCCTTCTCCTTTTATCCCTCCCAGTCCTTGCTGCCGGGATCACTATGCTCCTTACAGATCGAAACTTAAACACCTCTTTCTTCGATCCGGCGGGAGGAGGAGACCCCATCCTATATCAACATCT
>gi|332886585|gb|HM208840.1| Liza ramado haplotype 52Lra cytochrome oxidase subunit I (COI) gene, partial cds; mitochondrial
CTTAAGCCTGCTTATCCGAGCAGAACTAAGCCAACCTGGCGCTCTCCTGGGAGACGACCAGATTTACAATGTAATTGTTACGGCACACGCTTTCGTAATAATTTTCTTTATAGTAATACCAATTATGATTGGAGGGTTTGGAAACTGACTAGTCCCCTTAATGATCGGCGCCCCCGACATGGCCTTTCCTCGAATAAACAACATAAGCTTCTGACTTCTCCCCCCTTCATTCCTCCTCCTTCTAGCATCCTCTGGCGTAGAAGCAGGGGCAGGCACTGGATGGACCGTGTACCCTCCCCTGGCCAGCAATTTAGCACATGCCGGGGCATCCGTCGACCTGACAATCTTTTCCCTTCACCTAGCAGGTGTCTCTTCAATTTTAGGTGCTATTAACTTCATCACAACCATTATCAATATGAAACCTCCTGCGATCTCCCAATATCAAACCCCCCTATTTGTGTGAGCCGTCCTTATCACCGCCGTCCTTCTCCTTTTATCCCTCCCAGTCCTTGCTGCCGGGATCACTATGCTCCTTACAGATCGAAACTTAAACACCTCTTTCTTCGATCCGGCGGGAGGAGGAGACCCCATCCTATATCAACATCT
>gi|332886587|gb|HM208841.1| Mugil bananensis haplotype 56Mba cytochrome oxidase subunit I (COI) gene, partial cds; mitochondrial
CCTAAGCCTACTAATCCGAGCCGAATTAAGCCAACCTGGCGCTCTTCTAGGAGACGACCAGATTTATAATGTAGTTGTTACAGCTCATGCCTTTGTAATAATCTTTTTTATAGTAATACCAATTATGATTGGGGGCTTTGGAAACTGACTCATCCCCTTAATACTTGGTGCACCTGACATAGCATTCCCTCGAATAAATAACATAAGCTTCTGACTTCTTCCCCCCTCATTCCTCCTCCTCTTAGCATCTTCAGCAGTAGAAGCCGGGGCGGGTACAGGATGAACTGTTTACCCACCACTAGCCGGCAACTTAGCCCATGCCGGAGCATCCGTTGATCTCACCATCTTCTCCCTCCATCTTGCGGGTGTCTCCTCAATTTTAGGTGCTATCAACTTTATTACGACAATTATTAACATGAAACCTCCAGCCATCTCCCAGTATCAAACGCCCCTCTTCGTCTGAGCTGTCTTAATTACCGCCGTCCTTCTCCTTCTGTCACTTCCAGTCCTAGCCGCTGGTATTACTATGCTCCTAACAGATCGTAACCTAAATACTTCCTTCTTCGACCCTGCAGGAGGGGGAGACCCAATTCTATACCAACACTT
>gi|332886589|gb|HM208842.1| Mugil bananensis haplotype 60Mba cytochrome oxidase subunit I (COI) gene, partial cds; mitochondrial
CCTAAGCCTACTAATCCGAGCCGAATTAAGCCAACCTGGCGCTCTTCTAGGAGACGACCAGATTTATAATGTAGTTGTTACAGCTCATGCCTTTGTAATAATCTTTTTTATAGTAATACCAATTATGATTGGGGGCTTTGGAAACTGACTCATCCCCTTAATACTTGGTGCACCTGACATAGCATTCCCTCGAATAAATAACATAAGCTTCTGACTTCTTCCCCCCTCATTCCTCCTCCTCTTAGCATCTTCAGCAGTAGAAGCCGGGGCGGGTACAGGATGAACTGTTTACCCACCACTAGCCGGCAACTTAGCCCATGCCGGAGCATCCGTTGATCTCACCATCTTCTCCCTCCATCTTGCGGGTGTCTCCTCAATTTTAGGTGCTATCAACTTTATTACGACAATTATTAACATGAAACCTCCAGCCATCTCCCAGTATCAAACGCCCCTCTTCGTCTGAGCTGTCTTAATTACCGCCGTCCTTCTCCTTCTGTCACTTCCAGTCCTAGCCGCTGGTATTACTATGCTCCTAACAGATCGTAACCTAAATACTTCCTTCTTCGACCCTGCAGGAGGGGGAGACCCAATTCTTTACCAACACTT
>gi|332886591|gb|HM208843.1| Mugil bananensis haplotype 63Mba cytochrome oxidase subunit I (COI) gene, partial cds; mitochondrial
CCTAAGCCTACTAATCCGAGCCGAATTAAGCCAACCTGGCGCTCTTCTAGGAGACGACCAGATTTATAATGTAGTTGTTACAGCTCATGCCTTTGTAATAATCTTTTTTATAGTAATACCAATTATGATTGGGGGCTTTGGAAACTGACTCATCCCCTTAATACTTGGTGCACCTGACATAGCATTCCCTCGAATAAATAACATAAGCTTCTGACTTCTTCCCCCCTCATTCCTCCTCCTCTTAGCATCTTCAGCAGTAGAAGCCGGGGCGGGTACAGGATGAACTGTTTACCCACCACTAGCCGGCAACTTAGCCCATGCCGGAGCATCCGTTGATCTCACCATCTTCTCCCTCCATCTTGCGGGTGTCTCCTCAATTTTAGGTGCTATCAACTTTATTACGACAATTATTAACATGAAACCTCCAGCCATCTCCCAGTATCAAACGCCCCTCTTCGTCTGAGCTGTCTTAATTACCGCCGTCCTTCTCCTTCTGTCACTTCCAGTCCTAGCCGCTGGTATTACTATGCTCCTAACAGATCGTAACCTAAATACTTCCTTCTTTGACCCTGCAGGAGGGGGAGACCCAATTCTATACCAACACTT
>gi|332886593|gb|HM208844.1| Mugil cephalus haplotype 64NEMce cytochrome oxidase subunit I (COI) gene, partial cds; mitochondrial
CCTAAGCCTACTTATCCGAGCTGAACTAAGTCAACCCGGCGCTCTTCTAGGAGACGACCAGATTTATAATGTAATCGTTACAGCGCATGCTTTTGTAATAATCTTTTTTATAGTAATACCAATTATGATCGGGGGCTTTGGAAATTGACTAATTCCCCTAATAATTGGGGCACCTGACATAGCTTTTCCCCGAATAAATAATATGAGCTTCTGACTTCTTCCTCCATCATTCCTTCTCCTTCTAGCTTCTTCGGGAGTAGAAGCTGGGGCAGGAACAGGATGGACTGTTTATCCCCCATTAGCCAGCAACCTGGCTCACGCCGGAGCGTCTGTTGACCTTACCATTTTCTCCCTCCACCTTGCAGGTGTTTCCTCAATTTTAGGCGCTATTAACTTTATTACAACAATCATCAATATGAAACCTCCAGCTACTTCTCAATATCAAACACCCCTTTTCGTGTGAGCTGTCCTAATTACCGCTGTACTCCTTCTTTTATCACTACCAGTCTTAGCTGCTGGCATTACCATGCTCCTAACAGATCGAAACCTAAATACTTCCTTCTTCGACCCTGCAGGGGGAGGGGACCCAATTCTGTACCAACACCT
>gi|332886595|gb|HM208845.1| Mugil cephalus haplotype 67NEMce cytochrome oxidase subunit I (COI) gene, partial cds; mitochondrial
CCTAAGCCTACTTATCCGAGCTGAACTAAGTCAGCCTGGCGCTCTTCTAGGAGACGACCAGATTTATAATGTAATCGTTACAGCGCATGCTTTTGTAATAATCTTTTTTATAGTAATACCAATTATGATCGGGGGCTTTGGAAATTGACTAATTCCCCTAATAATTGGGGCACCTGACATAGCTTTTCCCCGAATAAATAATATGAGCTTCTGACTTCTTCCTCCATCATTCCTTCTCCTTCTAGCTTCTTCGGGAGTAGAAGCTGGGGCAGGAACAGGATGGACTGTTTATCCCCCATTAGCCAGCAACCTGGCTCACGCCGGAGCGTCTGTTGACCTTACCATTTTCTCCCTCCACCTTGCAGGTGTTTCCTCAATTTTAGGCGCTATTAACTTTATTACAACAATCATCAATATGAAACCTCCAGCTACTTCTCAATATCAAACACCCCTTTTCGTGTGAGCTGTCCTAATTACCGCTGTACTCCTTCTTTTATCACTACCAGTCTTAGCTGCTGGCATTACCATGCTCCTAACAGATCGAAACCTAAATACTTCCTTCTTCGACCCTGCAGGGGGAGGGGACCCAATTCTGTACCAACACCT
>gi|332886597|gb|HM208846.1| Mugil ashanteensis haplotype 74WAMce cytochrome oxidase subunit I (COI) gene, partial cds; mitochondrial
CCTAAGCCTACTTATCCGAGCTGAAMTAAGTCAACCKGGCGCTCTTCTAGGAGACGACCAGATTTATAATGTAATCGTTACAGCGCATGCTTTTGTAATAATCTTTTTTATAGTAATACCAATTATGATCGGGGGCTTCGGAAATTGACTAGTTCCCCTAATAATTGGGGCACCTGACATAGCTTTTCCCCGAATAAATAATATGAGCTTCTGACTTCTTCCTCCATCATTCCTTCTCCTTCTAGCCTCTTCGGGAGTAGAAGCTGGGGCAGGGACAGGATGAACTGTTTATCCCCCATTAGCCAGCAACCTGGCTCACGCCGGAGCATCTGTTGACCTCACTATTTTCTCCCTCCACCTTGCAGGTGTTTCCTCAATTTTAGGTGCTATTAACTTTATTACAACAATTATCAATATGAAACCCCCAGCTACTTCTCAATATCAGACACCCCTTTTCGTATGAGCTGTCCTAATTACCGCTGTACTCCTTCTTTTATCATTACCAGTCTTAGCTGCTGGCATTACCATACTCCTAACARATCGAAACCTAAATACTTCCTTCTTCGACCCTGCAGGGGGAGGGGACCCAATTCTGTATCAACACCT
>gi|332886599|gb|HM208847.1| Mugil ashanteensis haplotype 75WAMce cytochrome oxidase subunit I (COI) gene, partial cds; mitochondrial
CCTAAGCCTACTTATCCGAGCTGAACTAAGTCAACCTGGCGCTCTTCTAGGAGACGACCAGATTTATAATGTAATCGTTACAGCGCATGCTTTTGTAATAATCTTTTTTATAGTAATACCAATTATGATCGGGGGCTTCGGAAATTGACTAGTTCCCCTAATAATTGGGGCACCTGACATAGCTTTTCCCCGAATAAATAATATGAGCTTCTGACTTCTTCCTCCATCATTCCTTCTCCTTCTAGCCTCTTCGGGAGTAGAAGCTGGGGCAGGGACAGGATGAACTGTTTATCCCCCATTAGCCAGCAACCTGGCTCACGCCGGAGCATCTGTTGACCTCACTATTTTCTCCCTCCACCTTGCAGGTGTTTCCTCAATTTTAGGTGCTATTAACTTTATTACAACAATCATCAATATGAAACCCCCAGCTACTTCTCAATATCAGACACCCCTTTTCGTATGAGCTGTCCTAATTACCGCTGTACTCCTTCTTTTATCATTACCAGTCTTAGCTGCTGGCATTACCATACTCCTAACAGATCGAAACCTAAATACTTCCTTCTTCGACCCTGCAGGGGGAGGGGACCCAATTCTGTATCAACACCT
>gi|332886601|gb|HM208848.1| Mugil ashanteensis haplotype 81WAMce cytochrome oxidase subunit I (COI) gene, partial cds; mitochondrial
CCTAAGCCTACTTATCCGAGCTGAACTAAGTCAACCTGGCGCTCTTCTAGGAGACGACCAGATTTATAATGTAATCGTTACAGCACATGCTTTTGTAATAATCTTTTTTATAGTAATACCAATTATGATCGGGGGCTTCGGAAATTGACTAGTTCCCCTAATAATTGGGGCACCTGACATAGCTTTTCCCCGAATAAATAATATGAGCTTCTGACTTCTTCCTCCATCATTCCTTCTCCTTCTAGCCTCTTCGGGAGTAGAAGCTGGGGCAGGGACAGGATGAACTGTTTATCCCCCATTAGCCAGCAACCTGGCTCACGCCGGAGCATCTGTTGACCTCACTATTTTCTCCCTCCACCTTGCAGGTGTTTCCTCAATTTTAGGTGCTATTAACTTTATTACAACAATCATCAATATGAAACCCCCAGCTACTTCTCAATATCAGACACCCCTTTTCGTATGAGCTGTCCTAATTACCGCTGTACTCCTTCTTTTATCATTACCAGTCTTAGCTGCTGGCATTACCATACTCCTAACAGATCGAAACCTAAATACTTCCTTCTTCGACCCTGCAGGGGGAGGGGACCCAATTCTGTATCAACACCT
>gi|332886603|gb|HM208849.1| Mugil ashanteensis haplotype 84WAMce cytochrome oxidase subunit I (COI) gene, partial cds; mitochondrial
CCTAAGCCTACTTATCCGAGCTGAACTAAGTCAGCCTGGCGCTCTTCTAGGAGACGACCAGATTTATAATGTAATCGTTACAGCGCATGCTTTTGTAATAATCTTTTTTATAGTAATACCAATTATGATCGGGGGCTTCGGAAATTGACTAGTTCCCCTAATAATTGGGGCACCTGACATAGCTTTTCCCCGAATAAATAATATGAGCTTCTGACTTCTTCCTCCATCATTCCTTCTCCTTCTAGCCTCTTCGGGAGTAGAAGCTGGGGCAGGGACAGGATGAACTGTTTATCCCCCATTAGCCAGCAACCTGGCTCACGCCGGAGCATCTGTTGACCTCACTATTTTCTCCCTCCACCTTGCAGGTGTTTCCTCAATTTTAGGTGCTATTAACTTTATTACAACAATCATCAATATGAAACCCCCAGCTACTTCTCAATATCAGACACCCCTTTTCGTATGAGCTGTCCTAATTACCGCTGTACTCCTTCTTTTATCATTACCAGTCTTAGCTGCTGGCATTACCATACTCCTAACAGATCGAAACCTAAATACTTCCTTCTTCGACCCTGCAGGGGGAGGGGACCCAATTCTGTATCAACACCT
>gi|332886605|gb|HM208850.1| Mugil ashanteensis haplotype 87WAMce cytochrome oxidase subunit I (COI) gene, partial cds; mitochondrial
CCTAAGCCTACTTATCCGAGCTGAACTAAGTCAACCTGGCGCTCTTCTAGGAGACGACCAGATTTATAATGTAATCGTTACAGCGCATGCTTTTGTAATAATCTTTTTTATAGTAATACCAATTATGATCGGGGGCTTCGGAAATTGACTAGTTCCCCTAATAATTGGGGCACCTGACATAGCTTTTCCCCGAATAAATAATATGAGCTTCTGACTTCTTCCTCCATCATTCCTTCTCCTTCTAGCCTCTTCGGGAGTAGAAGCTGGGGCAGGGACAGGATGAACTGTTTATCCCCCATTAGCCAGCAACCTGGCTCACGCCGGAGCATCTGTTGACCTCACTATTTTCTCCCTCCACCTTGCAGGTGTTTCCTCAATTTTAGGCGCTATTAACTTTATTACAACAATTATCAATATGAAACCCCCAGCTACTTCTCAATATCAGACACCCCTTTTCGTATGAGCTGTCCTAATTACCGCTGTACTCCTTCTTTTATCATTACCAGTCTTAGCTGCTGGCATTACCATACTCCTAACAGATCGAAACCTAAATACTTCCTTCTTCGACCCTGCAGGGGGAGGGGACCCAATTCTGTATCAACACCT
>gi|332886607|gb|HM208851.1| Mugil metzelaari haplotype 99Mcu cytochrome oxidase subunit I (COI) gene, partial cds; mitochondrial
CCTAAGCCTGCTTATCCGGGCTGAACTAAGCCAACCTGGCGCTCTTTTAGGGGACGACCAGATCTACAATGTAATCGTTACAGCCCACGCTTTCGTAATAATTTTCTTTATAGTGATGCCTATCATAATCGGGGGCTTCGGAAACTGACTAGTTCCCTTAATGATTGGGGCACCTGACATAGCATTCCCTCGAATAAACAACATGAGCTTCTGACTTCTACCCCCCTCATTCCTTCTCCTCCTAGCCTCTTCAGGAGTTGAGGCGGGAGCTGGGACAGGATGAACTGTTTACCCACCACTGGCTGGCAACCTAGCCCACGCTGGGGCATCTGTTGACCTCACCATCTTCTCCCTACACCTAGCAGGTGTTTCTTCAATTTTAGGGGCTATTAACTTTATTACAACCATTCTTAACATGAAACCTCCTGCTATCTCGCAGTATCAGACACCTCTCTTTGTTTGGGCCGTTCTAATTACTGCCGTTCTCCTTCTCTTATCCCTCCCAGTTCTAGCCGCTGGCATCACTATGCTCCTAACAGACCGAAATTTAAATACTTCCTTCTTTGACCCTGCAGGAGGAGGGGACCCAATTCTGTATCAGCACTT
>gi|332886609|gb|HM208852.1| Mugil metzelaari haplotype 104Mcu cytochrome oxidase subunit I (COI) gene, partial cds; mitochondrial
CCTAAGCCTGCTTATCCGGGCTGAACTAAGCCAACCTGGCGCTCTTTTAGGGGACGACCAGATCTACAATGTAATCGTTACAGCCCACGCTTTCGTAATAATTTTCTTTATAGTGATGCCTATCATAATCGGGGGCTTCGGAAACTGACTAGTTCCCTTAATGATTGGGGCACCTGACATAGCATTCCCTCGAATAAACAACATGAGCTTCTGACTTCTACCCCCCTCATTCCTTCTCCTCCTAGCCTCTTCAGGAGTTGAGGCGGGAGCTGGGACAGGATGAACTGTATATCCACCACTGGCTGGCAACCTAGCCCACGCTGGGGCATCTGTTGACCTCACCATCTTCTCCCTACACCTAGCAGGTGTTTCTTCAATTTTAGGGGCTATTAACTTTATTACAACCATTCTTAACATGAAACCTCCTGCTATCTCGCAGTATCAGACACCTCTCTTTGTTTGGGCCGTTCTAATTACTGCCGTTCTCCTTCTCTTATCTCTCCCAGTTCTAGCCGCTGGCATCACTATGCTCCTAACAGACCGAAATTTAAATACTTCCTTCTTTGACCCTGCAGGAGGAGGGGACCCAATTCTGTATCAGCACTT
>gi|332886611|gb|HM208853.1| Mugil capurrii haplotype 118Mca cytochrome oxidase subunit I (COI) gene, partial cds; mitochondrial
CTTGAGCCTACTTATCCGAGCCGAATTAAGCCAACCTGGAGCTCTTTTAGGAGATGACCAGATTTATAATGTAATTGTTACAGCCCACGCTTTCGTAATAATCTTTTTTATAGTAATGCCAATTATGATCGGGGGCTTCGGAAACTGACTCATCCCCTTAATGCTGGGGGCACCCGATATGGCATTCCCACGAATGAATAACATAAGCTTTTGACTTCTCCCTCCCTCATTCCTTCTCCTCCTAGCATCCTCAGCAGTAGAGGCCGGAGCAGGAACAGGATGAACTGTTTACCCACCACTAGCCGGTAACTTAGCCCATGCCGGAGCATCTGTTGACCTTACCATCTTCTCCCTTCACCTTGCAGGTGTTTCCTCAATCCTAGGTGCTATTAACTTTATTACAACAATTATTAACATGAAACCTCCAGCTATCTCCCAGTACCAAACACCTCTCTTCGTTTGAGCTGTTCTAATTACTGCCGTTCTCCTCCTCCTTTCACTTCCAGTATTAGCCGCTGGCATTACTATGCTATTAACAGACCGTAACCTAAACACCTCCTTCTTCGACCCTGCTGGAGGAGGGGATCCAATTCTGTACCAACACCT
>gi|332886613|gb|HM208854.1| Mugil capurrii haplotype 122Mca cytochrome oxidase subunit I (COI) gene, partial cds; mitochondrial
CTTGAGCCTACTTATCCGAGCCGAATTAAGCCAACCTGGAGCTCTTTTAGGAGATGACCAGATTTATAATGTAATTGTTACAGCCCACGCTTTCGTAATAATCTTTTTTATAGTAATGCCAATTATGATCGGGGGCTTCGGAAACTGACTCATCCCCTTAATGCTGGGGGCACCCGATATGGCATTCCCACGAATGAATAACATAAGCTTTTGACTTCTCCCTCCCTCATTCCTTCTCCTCCTAGCATCCTCAGCAGTAGAGGCCGGAGCAGGAACAGGATGAACTGTTTACCCACCACTAGCCGGTAACTTAGCCCATGCCGGAGCATCTGTTGACCTTACCATCTTCTCCCTTCACCTTGCAGGTGTTTCCTCAATCCTAGGTGCTATTAACTTTATTACAACAATTATTAACATGAAACCTCCAGCTATCTCCCAGTACCAAACACCTCTCTTCGTTTGAGCTGTTCTAATTACTGCCGTTCTCCTCCTCCTTTCACTTCCAGTATTAGCCGCTGGCATTACCATGCTATTAACAGACCGTAACCTAAACACCTCCTTCTTCGACCCTGCTGGAGGAGGGGATCCAATTCTGTACCAACACCT
>gi|332886615|gb|HM208855.1| Oedalechilus labeo haplotype Ola cytochrome oxidase subunit I (COI) gene, partial cds; mitochondrial
CCTAARCCTGCTTATCCGAGCAGAGAAAAGCGAACCTGGTGCCCTCCTAGGAGACGACCAGATTTATAATAATCGMGTTACGGCCCACGCCTTCGTAATAATTTTCTTTATAGTAATACCAATCATGATTGGAGGGTTTGGAAACTGATTAATTCCTTTGATAATTGGTGCCCCCGATATAGCCTTCCCCCGAATAAACAACATAAGCTTTTGACTCCTCCCTCCATCATTCCTACTCCTTCTAGCATCTTCCGGCGTAGAAGCAGGGGCAGGAACCGGTTGAACCGTTTATCCGCCCCTAGCCAGCAACTTAGCGCATGCCGGAGCATCCGTTGATCTAACGATCTTCTCCCTGCATCTGGCAGGKGTCTCCTCAATTTTAGGCGCTATTAACTTCATTACAACGATTATTAATATGAAACCCCCTGCAATTTCTCAATATCAAACCCCTCTCTTTGTATGAGCCGTCCTCATTACTGCCGTTCTTCTTCTACTGTCTTTACCAGTCCTGGCTGCTGGCATTACCATGCTACTAACAGATCGAAACTTAAATACTTCTTTCTTTGACCCGGCAGGAGGAGGGGACCCTATTCTATATCAACACCT
>gi|328486042|gb|JF493796.1| Planiliza alata voucher ADC222.2-3 cytochrome oxidase subunit 1 (COI) gene, partial cds; mitochondrial
CCTCTATCTAGTATTCGGTGCCTGAGCGGGTATAGTAGGAACTGCCTTAAGCCTGCTTATCCGAGCAGAACTAAGCCAGCCTGNNGCTCTCCTAGGGGACGACCAGATCTACAATGTAATTGTTACAGCACACGCTTTCGTAATAATTTTCTTTATAGTAATGCCAATCATGATTGGCGGATTTGGAAACTGACTAGTCCCCCTAATGATCGGTGCCCCCGACATAGCCTTCCCCCGAATAAACAATATAAGCTTTTGACTTCTCCCCCCTTCATTTCTTCTCCTCTTAGCATCCTCTGGTGTAGAGGCAGGAGCCGGCACTGGATGAACTGTCTACCCTCCCCTGGCTAGCAACTTAGCACATGCCGGAGCATCCGTCGACTTAACAATTTTCTCCCTCCATCTAGCAGGTGTCTCCTCAATTTTAGGTGCTATTAACTTTATTACAACTATCATCAATATGAAACCCCCTGCAATCTCCCAATACCAAACTCCCCTCTTTGTATGAGCCGTCCTAATTACTGCCGTCCTCCTTCTCCTATCCTTGCCAGTTCTTGCTGCCGGAATTACCATGCTCCTAACAGACCGAAATCTAAACACCTCTTTCTTCGACCCAGCAGGAGGAGGANACCCCATTTNATATCAACATCTA
>gi|328486044|gb|JF493797.1| Planiliza alata voucher ADC222.2-2 cytochrome oxidase subunit 1 (COI) gene, partial cds; mitochondrial
CCTCTATCTAGTATTCGGTGCCTGAGCGGGTATAGTAGGAACTGCCTTAAGCCTGCTTATCCGAGCAGAACTAAGCCAGCCTGGCGCTCTCCTAGGGGACGACCAGATCTACAATGTAATTGTTACAGCACACGCTTTCGTAATAATTTTCTTTATAGTAATGCCAATCATGATTGGCGGATTTGGAAACTGACTAGTCCCCCTAATGATCGGTGCCCCCGACATAGCCTTCCCCCGAATAAACAATATAAGCTTTTGACTTCTCCCCCCTTCATTTCTTCTCCTCTTAGCATCCTCTGGTGTAGAGGCAGGAGCCGGCACTGGATGAACTGTCTACCCTCCCCTGGCTAGCAACTTAGCACATGCCGGAGCATCCGTCGACTTAACAATTTTCTCCCTCCATCTAGCAGGTGTCTCCTCAATTTTAGGTGCTATTAACTTTATTACAACTATCATCAATATGAAACCCCCTGCAATCTCCCAATACCAAACTCCCCTCTTTGTATGAGCCGTCCTAATTACTGCCGTCCTCCTTCTCCTATCCTTGCCAGTTCTTGCTGCCGGAATTACCATGCTCCTAACAGACCGAAATCTAAACACCTCTTTCTTCGACCCAGCAGGAGGAGGAGACCCCATTTTATATCAACATCTA
>gi|328486046|gb|JF493798.1| Planiliza alata voucher ADC222.2-1 cytochrome oxidase subunit 1 (COI) gene, partial cds; mitochondrial
ACTGCCTTAAGCCTGCTTATCCGAGCAGAACTAAGCCAGCCTGGCGCTCTCCTAGGGGACGACCAGATCTACAATGTAATTGTTACAGCACACGCTTTCGTAATAATTTTCTTTATAGTAATGCCAATCATGATTGGCGGATTTGGAAACTGACTAGTCCCCCTAATGATCGGTGCCCCCGACATAGCCTTCCCCCGAATAAACAATATAAGCTTTTGACTTCTCCCCCCTTCATTTCTTCTCCTCTTAGCATCCTCTGGNGTAGAGGCAGGAGCCGGCACTGGATGAACTGTCTACCCTCCCCTGGCTAGCAACTTAGCACATGCCGGAGCATCCGTCGACTTAACAATTTTCTCCCTCCATCTAGCAGGNGTCTCCTCAATTTTAGGTGCTATTAACTTTATTACAACTATCATCAATATGAAACCCCCTGCAATCTCCCAATACCAAACTCCCCTCTTTGTATGAGCCGTCCTAATTACTGCCGTCCTCCTTCTCCTATCCTTGCCAGTTCTTGCTGCCGGAATTACCATGCTCCTAACAGACCGAAATCTAAACACCTCTTTCTTCGACCCAGCNGGAGGAGGAGACCCCATTTTATATCAACATCTA
>gi|328486076|gb|JF493813.1| Chelon tricuspidens cytochrome oxidase subunit 1 (COI) gene, partial cds; mitochondrial
CCTTTATCTAGTATTTGGTGCCTGAGCGGGTATAGTAGGAACCGCCTTAAGCCTGCTTATCCGAGCAGAACTAAGCCAACCTGGTGCTCTCCTAGGGGATGACCAGATTTACAATGTAATTGTTACGGCACACGCTTTCGTAATAATTTTCTTTATAGTAATACCAATTATGATTGGAGGGTTTGGAAACTGACTAGTCCCCTTAATGATCGGCGCCCCCGACATGGCCTTCCCTCGAATGAACAACATAAGCTTCTGGCTTCTTCCCCCCTCATTCCTTCTTCTCTTAGCATCCTCCGGTGTAGAAGCAGGGGCAGGAACTGGGTGGACTGTATACCCTCCCCTCGCCAGCAATTTAGCACATGCCGGAGCATCCGTCGACCTGACAATCTTCTCCCTCCATTTAGCAGGTGTCTCCTCAATTTTAGGTGCTATTAATTTCATCACCACCATCATCAACATAAAACCTCCTGCAATTTCTCAGTATCAGACCCCCCTATTTGTATGAGCCGTCCTTATTACCGCCGTCCTTCTCCTCTTATCTCTGCCAGTTCTTGCTGCCGGAATCACTATGCTCCTAACAGACCGAAATTTAAATACCTCTTTCTTTGACCCCGCAGGAGGAGGAGA
>gi|328486346|gb|JF493948.1| Pseudomyxus capensis voucher ADC222.11-5 cytochrome oxidase subunit 1 (COI) gene, partial cds; mitochondrial
GTNTTTGGTGCCTGAGCTGGCATAGTAGGAACTNNCCTCAGNCTGCTTATCCGGGCAGAACTAANCCAACCTGGCGCTCTCTTGGGGGACGNCCAGATTTATAATGTAATTGTTACGGCGCACGCTTTCGTAATAATTTTCTTTATAGTAATACCAATCATGATTGGAGGCTTCGGAAACTGACTAGTTCCTCTAATGATTGGAGCCCCCGACATAGCCTTCCCTCGAATAAATAATATAAGCTTTTGACTCCTTCCCCCCTCATTCCTTCTTCTCCTAGCATCTTCTGGGGTAGAAGCAGGAGCGGGCACCGGGTGGACCGTCTACCCTCCACTGGCCAGCAATTTAGCGCATNCCGGAGCATCCGTCGATCTAACTATCTTCTCTCTCCATCTAGCTGGTGTTTCTTCAATTTTAGGGGCCATTAACTTTATCACAACCATTATTAATATAAAACCCCCTGCAATCTCTCAATATCAGACCCCTCTCTTTGTTTGAGCGGTTCTTATTACTGCCATTCTTCTTCTCTTATCCCTACCAGTCCTTGCTGCCGGAATTACAATNNNNNNAANNGANCGAAACTTT
>gi|328486348|gb|JF493949.1| Pseudomyxus capensis voucher ADC222.11-2 cytochrome oxidase subunit 1 (COI) gene, partial cds; mitochondrial
TAAGCCAACCTGGCGCTCTCTTGGGGGACGACCAGATTTATAATGTAATTGTTACGGCGCACGCTTTCGTAATAATTTTCTTTATAGTAATACCAATCATGATTGGAGGCTTCGGAAACTGACTAGTTCCTCTAATGATTGGAGCCCCCGACATAGCCTTCCCTCGAATAAATAATATAAGCTTTTGACTCCTTCCCCCCTCATTCCTTCTTCTCCTAGCATCTTCTGGGGTAGAAGCAGGAGCGGGCACCGGGTGGACCGTCTACCCTCCACTGGCCAGCAATTTAGCGCATGCCGGAGCATCCGTCGATCTAACTATCTTCTCTCTCCATCTAGCTGGGGTTTCTTCAATTTTAGGGGCCATTAACTTTATCACAACCATTATTAATATAAAACCCCCTGCAATCTCTCAATATCAGACCCCTCTCTTTGTTTGAGCGGTTCTTATTACTGCCATTCTTCTTCTCTTATCCCTACCAGTCCTTGCTGCCGGAATTACAATACTTCTAACAGATCGAAACTTAAACACTTCTTTCTTCGATCCGGCAGGAGGAGGAGATCCTATCTTATATCAACACCTA
>gi|328486350|gb|JF493950.1| Pseudomyxus capensis voucher ADC222.11-8 cytochrome oxidase subunit 1 (COI) gene, partial cds; mitochondrial
CCTCTATCTAGTATTTGGTGCCTGAGCTGGCATAGTAGGAACTGCCCTCAGCCTGCTTATCCGGGCAGAACTAAGCCAACCTGGCGCTCTCTTGGGGGACGACCAGATTTATAATGTAATTGTTACGGCGCACGCTTTCGTAATAATTTTCTTTATAGTAATACCAATCATGATTGGAGGCTTCGGAAACTGACTAGTTCCTCTAATGATTGGAGCCCCCGACATAGCCTTCCCTCGAATAAATAATATAAGCTTTTGACTCCTTCCCCCCTCATTCCTTCTTCTCCTAGCATCTTCTGGGGTAGAAGCAGGAGCGGGCACCGGGTGGACCGTCTACCCTCCACTGGCCAGCAATTTAGCGCATGCCGGAGCATCCGTCGATCTAACTATCTTCTCTCTCCATCTAGCTGGTGTTTCTTCAATTTTAGGGGCCATTAACTTTATCACAACCATTATTAATATAAAACCCCCTGCAATCTCTCAATATCAGACCCCTCTCTTTGTTTGAGCGGTTCTTATTACTGCCATTCTTCTTCTCTTATCCCTACCAGTCCTTGCTGCCGGAATTACAATACTTCTAACAGATCGAAACTTAAACACTTCTTTCTTCGATCCGGCAGGAGGAGGAGATCCTATCTTATATCAACACCTA
>gi|328486352|gb|JF493951.1| Pseudomyxus capensis voucher ADC222.11-4 cytochrome oxidase subunit 1 (COI) gene, partial cds; mitochondrial
GTATTTGGTGCCTGAGCTGGCATAGTNNGAACTNNCCTCAGCCTGCTTATCCGGGCAGAACTAAGCCAACCTGGCGCTCTCTTGGGGGACGACCAGATTTATAATGTAATTGTTACGGCGCACGCNTTCGTAATAATTTTCTTTATAGTAATACCAATCATGATTGGAGGCTTCGGAAACTGACTAGTTCCTCTAATGATTGGAGCCCCCGACATAGCCTTCCCTCGAATAAATAATATAAGCTTTTGACTCCTTCCCCCCTCATTCCTTCTTCTCCTAGCATCTTCTGGGGTAGAAGCAGGAGCGGGCACCGGGTGGACCGTCTACCCTCCNCTGGCCAGCAATTTAGCGCATGCCGGAGCATCCGTCGATCTAACTATCTTCTCTCTCCATCTAGCTGGTGTTTCTTCAATTTTAGGGGCCATTAACTTTATCACAACCATTATTAATATAAAACCCCCTGCAATCTCTCAATATCAGACCCCTCTCTTTGTTTGAGCGGTTCTTATTACTGCCATTCTTCTTCTCTTATCCCTACCAGTCCTTGCTGCCGGAATTACAATNCNNNNAACAGATCGAAACTTAAANNCTTCTTNCTTCG
>gi|328486354|gb|JF493952.1| Pseudomyxus capensis voucher ADC222.11-7 cytochrome oxidase subunit 1 (COI) gene, partial cds; mitochondrial
CCTCTATCTAGTATTTGGTGCCTGAGCTGGCATAGTAGGAACTGCCCTCAGCCTGCTTATCCGGGCAGAACTAAGCCAACCTGGCGCTCTCTTGGGGGACGACCAGATTTATAATGTAATTGTTACGGCGCACGCTTTCGTAATAATTTTCTTTATAGTAATACCAATCATGATTGGAGGCTTCGGAAACTGACTAGTTCCTCTAATGATTGGAGCCCCCGACATAGCCTTCCCTCGAATAAATAATATAAGCTTTTGACTCCTTCCCCCCTCATTCCTTCTTCTCCTAGCATCTTCTGGGGTAGAAGCAGGAGCGGGCACCGGGTGGACCGTCTACCCTCCACTGGCCAGCAATTTAGCGCATGCCGGAGCATCCGTCGATCTAACTATCTTCTCTCTCCATCTAGCTGGTGTTTCTTCAATTTTAGGGGCCATTAACTTTATCACAACCATTATTAATATAAAACCCCCTGCAATCTCTCAATATCAGACCCCTCTCTTTGTTTGAGCGGTTCTTATTACTGCCATTCTTCTTCTCTTATCCCTACCAGTCCTTGCTGCCGGAATTACAATACTTCTAACAGATCGAAACTTAAACACTTCTTTCTTCGATCCGGCAGGAGGAGGAGATCCTATCTTATATCAACACCTA
>gi|328486356|gb|JF493953.1| Pseudomyxus capensis voucher ADC222.11-1 cytochrome oxidase subunit 1 (COI) gene, partial cds; mitochondrial
TAATGTAATTGTTACGGCGCACGCTTTCGTAATAATTTTCTTTATAGTAATACCAATNATGATTGGAGGCTTCGGAAACTGACTAGTTCCTCTAATGATTGGAGCCCCCGACATAGCCTTCCCTCGAATAAATAATATAAGCTTTTGACTCCTTCCCCCCTCATTCCTTCTTCTCCTAGCATCTTCTGGGGTAGAAGCAGGAGCGGGCACCGGGTGGACCGTCTACCCTCCACTGGCCAGCAATTTAGCGCATGCCGGAGCATCCGTCGATCTAACTATCTTCTCTCTCCATCTAGCTGGTGTTTCTTCAATTTTAGGGGCCATTAACTTTATCACAACCATTATTAATATAAAACCCCCTGCAATCTCTCAATATCAGACCCCTCTCTTTGTTTGAGCGGTTCTTATTACTGCCATTCTTCTTCTCTTATCCCTACCAGTCCTTGCTGCCGGAATTACAATACTTCTAACAGATCGAAACTTAAACACTTCTTTCTTCGATCCGGCAGGAGGAGGAGATCCTATCTTATATCAACACCT
>gi|381281947|gb|JQ060394.1| Agonostomus catalai isolate 23 cytochrome oxidase subunit I (COI) gene, partial cds; mitochondrial
TGCTTATCCGAGCAGAATTAAGCCAACCGGGCACCCTTCTAGGAGACGACCAAATTTATAACGTAATTGTAACAGCTCACGCTTTTGTAATAATTTTCTTTATAGTGATACCAATTATGATTGGAGGTTTCGGAAACTGACTAATTCCCCTAATAATTGGTGCCCCTGATATAGCATTTCCTCGTATAAATAACATAAGCTTTTGATTACTCCCCCCTTCATTTCTACTCCTCCTGGCATCCTCCGGAGTAGAAGCAGGGGCGGGAACAGGGTGGACCGTCTACCCACCGCTGGCCAGCAACCTGGCCCACGCGGGAGCATCCGTTGATTTAACCATCTTCTCCCTTCACCTGGCAGGTGTGTCCTCAATCCTAGGCGCTATTAACTTTATTACGACCATCATTAATATAAAACCGCCTGCAATTTCCCAATATCAAACACCTCTTTTTGTGTGAGCTGTACTAATTACTGCTGTACTTCTTCTTCTATCCCTACCAGTCCTTGCTGCCGGTATTACTATACTACTAACAGATCGGAACCTAAATACATCCTTCTTCGACCCCGCAGGAGGAGGGGACCCCATCTTATATCAGCACTTATTCTGATTCTTTGGACATCCAGAAGTTTACATTCTGATCCTTCCTGGCTTTGGTATGATCTCTCATATTGTTGCATACTACGCAGGTAAAAAAGAGCCTTTCGGCTACATAGGAATGGTCTGAGCCATGATGGCTATCGGCCTGCTAGGCTTCATTGTTTGAGCACACCACATGTTCACTGTTGGCATGGACGTAGACACTCGTGCATACTTTACATCCGCCACAATAATCATTGCCATCCCAACAGGCGTAAAAGTCTTTAGCTGACTGGCAACCCTTCACGGAGGGTCTGTGAAATGAGAAACGCCTCTCCTTTGAGCCCTAGGCTTTATCTTCTTATTCACAGTGGGGGGCCTCACAGGAATCGTCTTAGCCAACTCCTCACTAGACATCGTCCTACATGACACATACTATGTAGTAGCCCATTTCCACTACGT
>gi|381281949|gb|JQ060395.1| Agonostomus monticola isolate 026 cytochrome oxidase subunit I (COI) gene, partial cds; mitochondrial
TGCTTATTCGGGCAGAACTAAGCCAGCCAGGGGCTCTTTTGGGGGACGACCAAATTTATAATGTAATTGTGACAGCTCACGCCTTCGTAATAATTTTCTTTATAGTTATGCCAATTATAATCGGGGGTTTCGGAAACTGACTTATTCCCCTAATAATTGGTGCCCCGGACATAGCATTTCCTCGAATAAATAATATAAGCTTTTGACTACTTCCCCCTTCATTTCTACTTCTCCTAGCATCTTCTGGTGTAGAAGCAGGGGCAGGAACAGGGTGAACTGTCTACCCACCACTAGCCAGCAACCTGGCCCATGCAGGAGCATCTGTTGATCTTACTATTTTCTCCCTTCATTTGGCAGGTGTCTCTTCAATTCTAGGTGCCATTAATTTTATCACAACCATTATTAATATGAAACCCCCTGCAATTTCCCAGTATCAAACACCTCTTTTTGTATGAGCTGTCTTAATTACTGCTGTCCTACTTCTCCTCTCTTTACCAGTCCTTGCCGCTGGTATTACCATACTTTTAACAGACCGAAATTTAAATACCTCCTTCTTTGACCCCGCGGGAGGGGGAGACCCTATTTTATATCAACACTT
>gi|381281951|gb|JQ060396.1| Agonostomus monticola isolate 028 cytochrome oxidase subunit I (COI) gene, partial cds; mitochondrial
TGCTTATTCGGGCAGAACTAAGCCAGCCAGGGGCTCTTTTGGGGGACGACCAAATTTATAATGTAATTGTGACAGCTCACGCCTTCGTAATAATTTTCTTTATAGTTATGCCAATTATAATCGGGGGTTTCGGAAACTGACTTATTCCCCTAATAATTGGTGCCCCGGACATAGCATTTCCTCGAATAAATAATATAAGCTTTTGACTACTTCCCCCTTCATTTCTACTTCTCCTAGCATCTTCTGGTGTAGAAGCAGGGGCAGGAACAGGGTGAACTGTCTACCCACCACTAGCCAGCAACCTGGCCCATGCAGGAGCATCTGTTGATCTTACTATTTTCTCCCTTCATTTGGCAGGTGTCTCTTCAATTCTAGGTGCCATTAATTTTATCACAACCATTATTAATATAAAACCCCCTGCAATTTCCCAGTATCAAACACCTCTTTTTGTATGAGCTGTCTTAATTACTGCTGTCCTACTTCTCCTCTCTTTACCAGTCCTTGCCGCTGGTATTACCATACTTTTAACAGACCGAAATTTAAATACCTCCTTCTTTGACCCCGCGGGAGGGGGAGACCCTATTTTATATCAACACTT
>gi|381281953|gb|JQ060397.1| Agonostomus monticola isolate 030 cytochrome oxidase subunit I (COI) gene, partial cds; mitochondrial
TGCTTATTCGGGCAGAACTAAGCCAGCCAGGGGCTCTTTTGGGGGACGACCAAATTTATAATGTAATTGTGACAGCTCACGCCTTCGTAATAATTTTCTTTATAGTTATGCCAATTATAATCGGGGGTTTCGGAAACTGACTTATTCCCCTAATAATTGGTGCCCCGGACATAGCATTTCCTCGAATAAATAATATAAGCTTTTGACTACTTCCCCCTTCATTTCTACTTCTCCTAGCATCTTCTGGTGTAGAAGCAGGGGCAGGAACAGGGTGAACTGTCTACCCACCACTAGCCAGCAACCTGGCCCATGCAGGAGCATCTGTTGATCTTACTATTTTCTCCCTTCATTTGGCAGGTGTCTCTTCAATTCTAGGTGCCATTAATTTTATCACAACCATTATTAATATGAAACCCCCTGCAATTTCCCAGTATCAAACACCTCTTTTTGTATGAGCTGTCTTAATTACTGCTGTCCTACTTCTCCTCTCTTTACCAGTCCTTGCCGCTGGTATTACCATACTTTTAACAGACCGAAATTTAAATACCTCCTTCTTTGACCCCGCGGGAGGGGGAGACCCTATTTTATATCAACACTT
>gi|381281955|gb|JQ060398.1| Agonostomus monticola isolate 031a cytochrome oxidase subunit I (COI) gene, partial cds; mitochondrial
TGCTTATTCGGGCAGAACTAAGCCAACCAGGGGCTCTCTTGGGGGACGACCAAATTTACAATGTAATTGTGACAGCTCACGCCTTCGTAATAATTTTCTTTATAGTTATACCAATCATGATCGGGGGTTTCGGAAACTGACTTGTCCCTCTAATAATTGGCGCCCCGGACATAGCATTCCCTCGAATAAATAACATAAGCTTCTGATTACTCCCCCCTTCATTTCTACTTCTTCTAGCATCTTCTGGCGTAAAAGCAGGGGCAGGAACAGGGTGGACCGTCTACCCACCACTAGCCAGCAACCTAGCCCATGCAGGAGCATCTGTTGATCTGACTATCTTCTCTCTCCATTTGGCAGGTGTCTCTTCAATTCTAGGTGCTATTAATTTTATCACAACCATTATTAATATGAAGCCCCCTGCAATCTCCCAATATCAAACACCTCTTTTTGTATGGGCTGTCCTAATTACTGCTGTCCTTCTTCTCCTATCTTTACCAGTCCTTGCCGCTGGCATTACCATACTTTTAACAGATCGAAATCTAAATACCTCTTTCTTCGACCCCGCAGGAGGGGGAGACCCTATCTTGTATCAGCACTT
>gi|381281957|gb|JQ060399.1| Agonostomus monticola isolate 031b cytochrome oxidase subunit I (COI) gene, partial cds; mitochondrial
TGCTTATTCGGGCAGAACTAAGCCAACCAGGGGCTCTCTTGGGGGACGACCAAATTTACAATGTAATTGTGACAGCTCACGCCTTCGTAATAATTTTCTTTATAGTTATACCAATCATGATCGGGGGTTTCGGAAACTGACTTGTCCCTCTAATAATTGGCGCCCCGGACATAGCATTCCCTCGAATAAATAACATAAGCTTCTGATTACTCCCCCCTTCATTTCTACTTCTTCTAGCATCTTCTGGCGTAGAAGCAGGGGCAGGAACAGGGTGGACCGTCTACCCACCACTAGCCAGCAACCTAGCCCATGCAGGAGCATCTGTTGATCTGACTATCTTCTCTCTCCATTTGGCAGGTGTCTCTTCAATTCTAGGTGCTATTAATTTTATCACAACCATTATTAATATGAAGCCCCCTGCAATCTCCCAATATCAAACACCTCTTTTTGTATGGGCTGTCCTAATTACTGCTGTCCTTCTTCTCCTATCTTTACCAGTCCTTGCCGCTGGCATTACCATACTTTTAACAGATCGAAATCTAAATACCTCTTTCTTCGACCCCGCAGGAGGGGGAGACCCTATCTTGTATCAGCACTT
>gi|381281959|gb|JQ060400.1| Agonostomus monticola isolate 031c cytochrome oxidase subunit I (COI) gene, partial cds; mitochondrial
TGCTTATTCGGGCAGAACTAAGCCAACCAGGGGCTCTCTTGGGGGACGACCAAATTTACAATGTAATTGTGACAGCTCACGCCTTCGTAATAATTTTCTTTATAGTTATACCAATCATGATCGGGGGTTTCGGAAACTGACTTGTCCCTCTAATAATTGGCGCCCCGGACATAGCATTCCCTCGAATAAATAACATAAGCTTCTGATTACTCCCCCCTTCATTTCTACTTCTTCTAGCATCTTCTGGCGTAAAAGCAGGGGCAGGAACAGGGTGGACCGTCTACCCACCACTAGCCAGCAACCTAGCCCATGCAGGAGCATCTGTTGATCTGACTATCTTCTCTCTCCATTTGGCAGGTGTCTCTTCAATTCTAGGTGCTATTAATTTTATCACAACCATTATTAATATGAAGCCCCCTGCAATCTCCCAATATCAAACACCTCTTTTTGTATGGGCTGTCCTAATTACTGCTGTCCTTCTTCTCCTATCTTTACCAGTCCTTGCCGCTGGCATTACCATACTTTTAACAGATCGAAATCTAAATACCTCTTTCTTCGACCCCGCAGGAGGGGGAGACCCTATCTTGTATCAGCACTT
>gi|381281961|gb|JQ060401.1| Agonostomus monticola isolate 032 cytochrome oxidase subunit I (COI) gene, partial cds; mitochondrial
TGCTTATTCGGGCAGAACTAAGCCAGCCAGGGGCTCTTTTGGGGGACGACCAAATTTATAATGTAATTGTGACAGCTCACGCCTTCGTAATAATTTTCTTTATAGTTATGCCAATTATAATCGGGGGTTTCGGAAACTGACTTATTCCCCTAATAATTGGTGCCCCGGACATAGCATTTCCTCGAATAAATAATATAAGCTTTTGACTACTTCCCCCTTCATTTCTACTTCTCCTAGCATCTTCTGGTGTAGAAGCAGGGGCAGGAACAGGGTGAACTGTTTACCCACCACTAGCCAGCAACCTGGCCCATGCAGGAGCATCTGTTGATCTTACTATTTTCTCCCTTCATTTGGCAGGTGTCTCTTCAATTCTAGGTGCCATTAATTTTATCACAACCATTATTAATATGAAACCCCCTGCAATTTCCCAGTATCAAACACCTCTTTTTGTATGAGCTGTCTTAATTACTGCTGTCCTACTTCTCCTCTCTTTACCAGTCCTTGCCGCTGGTATTACCATACTTTTAACAGACCGAAATTTAAATACCTCCTTCTTTGACCCCGCGGGAGGGGGAGACCCTATTTTATATCAACACTTATTTTGATTCTTTGGCCATCCAGAAGTGTATATCCTGATTCTTCCCGGCTTCGGAATGATCTCCCACATTGTTGCATACTATTCAGGTAAAAAAGAACCTTTTGGCTATATAGGAATGGTTTGAGCCATAATGGCCATCGGCCTACTAGGTTTCATTGTCTGAGCTCACCACATGTTCACAGTTGGCATGGATGTAGATACTCGTGCTTACTTTACTTCCGCTACAATAATTATTGCCATCCCCACGGGTGTAAAAGTCTTTAGCTGACTAGCAACTCTTCATGGAGGCTCAATTAAATGAGAAACCCCGCTTCTATGGGCCCTAGGCTTCATTTTCCTTTTTACAGTTGGCGGACTTACAGGTATTATTTTAGCTAACTCCTCCCTAGACATTGTGCTACATGATACGTACTATGTAGTTGCCCATTTCCATTATGTTCTCTCTATAGGTGCTGTATTCGCTATTATAGGAGGGTTTGTTCACTGATTCCCATTATTCTCGGGCTATACACTCCATGATACATGAACAAAAATTCACTTTGGGGTAATATTCGCGGGTGTAAACCTAACTTTCTTCCCGCAACATTTCCTGGGGTTAGCAGGGATACCCCGACGATACTCAGACTACCCAGATGCTTACACCCTTTGAAATACTATCTCTTCTATAGGATCACTAGTTTCCTTAGTAGCTGTAATCATATTTTTATTTATTATCTGAGAAGCCTTCGTTGCTAAACGGGAAGTCCTATCAGTAGAACTAACCTCTACGAACGTGGAATGACTTCATGGATGCCCCCCACCCTATCA
>gi|381281963|gb|JQ060402.1| Agonostomus monticola isolate 33 cytochrome oxidase subunit I (COI) gene, partial cds; mitochondrial
TGCTTATTCGGGCAGAACTAAGCCAACCAGGGGCTCTCTTGGGGGACGACCAAATTTACAATGTAATTGTGACAGCTCACGCCTTCGTAATAATTTTCTTTATAGTTATACCAATCATGATCGGGGGTTTCGGAAACTGACTTGTCCCTCTAATAATTGGCGCCCCGGACATAGCATTCCCTCGAATAAATAACATAAGCTTCTGATTACTCCCCCCTTCATTTCTACTTCTTCTAGCATCTTCTGGCGTAGAAGCAGGGGCAGGAACAGGGTGGACCGTCTACCCACCACTAGCCAGCAACCTAGCCCATGCAGGAGCATCTGTTGATCTGACTATCTTCTCTCTCCATTTGGCAGGTGTCTCTTCAATTCTAGGTGCTATTAATTTTATCACAACCATTATTAATATGAAGCCCCCTGCAATCTCCCAATATCAAACACCTCTTTTTGTATGGGCTGTCCTAATTACTGCTGTCCTTCTTCTCCTATCTTTACCAGTCCTTGCCGCTGGCATTACCATACTTTTAACAGATCGAAATCTAAATACCTCTTTCTTCGACCCCGCAGGAGGGGGAGACCCTATCTTGTATCAGCACTT
>gi|381281965|gb|JQ060403.1| Agonostomus monticola isolate 035 cytochrome oxidase subunit I (COI) gene, partial cds; mitochondrial
TGCTTATCCGAGCAGAAATAAGCCAACCAGGGGCTCTTTTAGGAGACGACCAAATTTATAATGTAATTGTAACAGCTCACGCCTTTGTAATAATTTTCTTTATAGTTATACCAATTATGATCGGAGGCTTCGGAAACTGACTTGTCCCCCTAATAATTGGTGCTCCTGACATAGCATTTCCCCGAATGAATAATATAAGTTTTTGGCTTCTTCCACCCTCATTTCTACTTCTACTTGCATCTTCTGGGGTAGAGGCAGGGGCGGGAACAGGATGAACCGTCTATCCGCCACTAGCCAGCAACCTGGCCCACGCAGGAGCATCTGTTGATTTAACCATCTTCTCACTTCATTTAGCAGGTGTCTCTTCAATTCTAGGTGCTATTAACTTCATTACAACTATTATTAATATGAAACCCCCTGCAATCTCCCAGTATCAGACACCTCTATTTGTCTGAGCTGTATTAATTACTGCTGTCCTTCTCCTCCTATCCCTGCCCGTTCTTGCTGCTGGCATCACTATACTTCTGACAGATCGAAACCTAAATACCTCTTTCTTTGACCCTGCAGGAGGAGGCGATCCTATTTTATATCAACACTT
>gi|381281967|gb|JQ060405.1| Aldrichetta forsteri isolate 10 cytochrome oxidase subunit I (COI) gene, partial cds; mitochondrial
TACTCATCCGAGCGGAACTAAGCCAACCTGGTGCTCTACTAGGGGACGACCAGATCTATAACGTTATTGTGACAGCTCACGCTTTTGTAATAATTTTCTTTATAGTAATACCAATCATGATTGGGGGATTCGGAAACTGACTGATCCCTCTAATGATCGGKGCGCCCGATATAGCATTCCCTCGAATGAACAATATGAGCTTTTGACTTCTTCCCCCATCATTCCTCCTTCTCCTGGCATCTTCTGGAGTCGAAGCAGGGGCGGGAACAGGATGAACCGTTTACCCACCCCTATCTAGCAATCTGGCACATGCCGGAGCCTCCGTARATCTAACTATTTTCTCCCTGCATCTAGCGGGTGTCTCCTCAATTTTAGGGGCCATCAACTTCATTACAACCATCATCAACATGAAGCCCCCTGCAATCTCTCAGTACCAAACCCCTCTTTTTGTCTGAGCTGTACTCATTACAGCCGTCCTTCTTCTCCTGTCTCTGCCAGTTCTTGCTGCCGGAATCACCATACTTCTAACAGATCGAAATTTAAATACCTCTTTCTTCGACCCTGCAGGAGGGGGAGATCCTATTTTATATCAGCATCT
>gi|381281969|gb|JQ060406.1| Cestraeus goldiei isolate 12 cytochrome oxidase subunit I (COI) gene, partial cds; mitochondrial
TACTTATTCGAGCAGAACTAAGCCAGCCTGGCACTCTCTTAGGAGATGACCAAATTTATAATGTAATTGTTACAGCTCACGCTTTTGTAATAATTTTCTTTATAGTGATGCCAATCATAATTGGAGGGTTTGGAAACTGACTAGTCCCCCTAATAATTGGTGCGCCCGACATGGCATTCCCTCGAATAAACAATATGAGCTTTTGACTCCTTCCTCCCTCATTCCTGCTCCTTCTAGCCTCTTCTGGGGTAGAGGCAGGGGCCGGGACAGGATGGACTGTATACCCCCCATTAGCCAGCAACCTAGCCCACGCCGGGGCATCTGTCGACCTTACCATCTTCTCCCTCCACCTCGCAGGAGTATCCTCGATTTTAGGTGCTATTAACTTTATTACAACAATTATCAACATAAAACCCCCCGCAATTTCGCAGTATCAGACGCCTCTCTTTGTCTGGGCTGTCCTGATTACCGCTGTCCTTCTTCTCCTGTCCCTTCCGGTACTCGCTGCTGGGATTACAATGCTTTTAACTGACCGAAATTTAAATACTTCTTTCTTCGACCCTGCGGGAGGAGGAGACCCTATCCTATACCAACACTTGTTCTGATTCTTTGGGCACCCAGAAGTGTATATTCTTATTCTCCCCGGATTTGGTATAATTTCACATATTGTTGCGTACTATTCAGGCAAAAAAGAACCCTTTGGTTATATAGGAATAGTCTGAGCCATAATGGCCATCGGCCTTTTAGGTTTTATTGTTTGAGCACATCACATGTTTACCGTTGGTATAGATGTTGATACTCGCGCTTACTTTACCTCCGCTACAATAATTATCGCCATCCCCACTGGTGTGAAAGTCTTTAGTTGGCTAGCGACACTCCACGGGGGCTCAGTAAAATGAGAAACCCCCCTCCTTTGAGCCCTGGGGTTCATTTTCCTCTTTACAGTTGGAGGGCTAACCGGAATTATTCTAGCCAACTCCTCCCTAGACATTGTATTGCACGACACATACTATGTAGTAGCCCACTTCCACTATGTCCTTTCAATGGGGGCCGTATTTGCTATCATGGGAGGCTTCGTTCACTGGTTCCCCCTGTTTTCTGGATACACTCTTCACGAGACATGAACAAAAATTCACTTTGGAGTAATATTCGTGGGCGTAAACCTAACTTTCTTCCCACAACACTTCCTAGGCTTAGCAGGGATACCTCGACGGTACTCTGACTACCCAGATGCCTACAGCCTTTGAAACACCGTCTCTTCAATGGGGTCCCTAGTTTCTCTAGTAGCAGTTATTATATTCTTGTACATCATCTGAGAGGCTTTTGTTGCCAAACGGGAAGTCCTGACAGTAGAGCTGACTTCTACAAATGTTGAGTGATTACACGGATGCCCCCCTCCATACCA
>gi|381281971|gb|JQ060407.1| Cestraeus oxyrhyncus isolate 11 cytochrome oxidase subunit I (COI) gene, partial cds; mitochondrial
TACTTATTCGAGCAGAACTAAGCCAACCTGGCACTCTTTTAGGGGATGACCAAATTTATAATGTAATTGTTACAGCTCACGCTTTTGTAATAATTTTCTTTATAGTAATGCCAATCATAATTGGAGGCTTTGGAAACTGATTAGTCCCCCTAATAATCGGTGCGCCTGATATGGCATTCCCTCGAATAAACAATATGAGCTTCTGACTTCTTCCTCCCTCATTCCTGCTCCTTCTAGCTTCTTCTGGGGTAGAGGCGGGGGCTGGGACAGGATGAACTGTATACCCCCCATTAGCTAGCAACCTGGCCCACGCCGGGGCATCTGTCGACCTTACCATCTTCTCCCTTCACCTCGCAGGAGTATCCTCGATTTTAGGTGCTATTAATTTTATTACAACGATTATTAACATAAAACCCCCCGCAATCTCTCAGTATCAAACACCTCTCTTTGTCTGGGCTGTCCTAATTACGGCTGTCCTTCTTCTCCTGTCCCTCCCAGTACTCGCTGCTGGAATCACAATGCTTCTAACAGACCGAAACTTAAATACTTCTTTCTTTGACCCTGCGGGAGGAGGAGACCCTATCCTGTACCAACACTTGTTCTGATTCTTTGGACACCCAGAAGTGTATATTCTCATCCTCCCCGGATTTGGGATGATTTCACATATTGTTGCGTACTATTCAGGCAAAAAAGAACCCTTCGGCTACATGGGGATAGTCTGAGCTATAATAGCCATCGGCCTCTTAGGTTTTATTGTCTGAGCACATCATATATTTACTGTTGGCATGGATGTTGACACTCGCGCCTACTTTACCTCCGCTACAATAATTATCGCCATCCCCACTGGTGTAAAAGTCTTTAGCTGACTAGCGACACTTCACGGGGGCTCAGTAAAATGAGAGACCCCCCTCCTTTGAGCCCTAGGGTTCATCTTCCTCTTTACAGTGGGGGGGCTAACCGGGATTATCCTAGCCAACTCCTCCCTAGACATCGTACTGCACGACACATACTATGTAGTAGCCCACTTCCACTACGTTCTCTCAATGGGGGCCGTATTTGCTATTATGGGAGGTTTCGTTCACTGATTCCCCTTATTTTCTGGTTATACTCTTCACGAGACATGAACAAAAATTCACTTTGGAGTTATATTCGTAGGCGTGAACCTAACTTTCTTCCCACAACACTTCCTAGGCCTAGCAGGGATACCTCGACGGTATTCTGACTACCCAGATGCCTACACCCTTTGAAACACCATTTCTTCAATGGGGTCCCTAGTTTCTCTAGTCGCAGTTATTATATTCTTGTATATTATCTGAGAAGCTTTTGTTGCCAAACGAGAAATCCTGATAGTAGAACTAACTTCTACAAATGTTGAGTGATTACACGGGTGCCCTCCTCCATACCA
>gi|381281973|gb|JQ060408.1| Chaenomugil proboscideus isolate 2 cytochrome oxidase subunit I (COI) gene, partial cds; mitochondrial
TGCTTATTCGAGCGGAACTAAGCCAACCTGGAGCCCTTCTAGGGGATGACCAGATTTATAATGTAATTGTTACAGCCCACGCTTTTGTAATAATTTTCTTTATAGTAATACCAATCATAATCGGAGGTTTCGGAAACTGACTAATCCCCCTAATGATCGGGGCACCCGATATGGCATTCCCTCGAATGAACAACATGAGCTTTTGGCTTCTCCCTCCTTCCTTTCTTCTCCTCCTCGCATCTTCTGGAGTAGAGGCCGGAGCGGGGACAGGATGAACTGTTTATCCTCCCCTGGCCAGCAACCTGGCCCATGCCGGAGCTTCCGTTGATTTAACCATCTTCTCTCTTCACCTGGCCGGGGTTTCCTCAATTCTAGGTGCAATTAATTTTATTACAACCATTATTAATATGAAACCTCCCGCAATTTCTCAGTACCAAACACCGCTATTCGTGTGGGCCGTCCTAATTACTGCTGTCCTTCTTCTTTTATCATTACCAGTCTTGGCTGCCGGCATTACTATGCTCCTTACAGACCGAAATTTAAACACCTCTTTCTTCGACCCTGCGGGAGGCGGAGATCCTATTTTGTATCAACACCTGTTCTGATTCTTTGGCCACCCAGAAGTGTATATTCTTATTCTTCCTGGCTTCGGAATAATTTCACATATTGTCGCATACTATTCAGGTAAAAAAGAACCTTTCGGCTACATGGGAATAGTCTGGGCTATGATGGCCATTGGCCTCTTGGGATTCATTGTATGAGCC
>gi|381281975|gb|JQ060409.1| Chaenomugil proboscideus isolate 002c cytochrome oxidase subunit I (COI) gene, partial cds; mitochondrial
TGCTTATTCGAGCGGAACTAAGCCAACCTGGAGCCCTTCTAGGGGATGACCAGATTTATAATGTAATTGTTACAGCCCACGCTTTTGTAATAATTTTCTTTATAGTAATACCAATCATAATCGGAGGTTTCGGAAACTGACTAATCCCCCTAATGATCGGGGCACCCGATATGGCATTCCCTCGAATGAACAACATGAGCTTTTGGCTTCTCCCTCCTTCCTTTCTTCTCCTCCTCGCATCTTCTGGAGTAGAGGCCGGAGCGGGGACAGGATGAACTGTTTATCCTCCCCTGGCCAGCAACCTGGCCCATGCCGGAGCTTCCGTTGATTTAACCATCTTCTCTCTTCACCTGGCCGGGGTTTCCTCAATTCTAGGTGCAATTAATTTTATTACAACCATTATTAATATGAAACCTCCCGCAATTTCTCAGTACCAAACACCGCTATTCGTGTGGGCCGTCCTAATTACTGCTGTCCTTCTTCTTTTATCATTACCAGTCTTGGCTGCCGGCATTACTATGCTCCTTACAGACCGAAATTTAAACACCTCTTTCTTCGACCCTGCGGGAGGCGGAGATCCTATTTTATATCAACACCT
>gi|381281977|gb|JQ060410.1| Chaenomugil proboscideus isolate 002d cytochrome oxidase subunit I (COI) gene, partial cds; mitochondrial
TGCTTATTCGAGCGGAACTAAGCCAACCTGGAGCCCTTCTAGGGGATGACCAGATTTATAATGTAATTGTTACAGCCCACGCTTTTGTAATAATTTTCTTTATAGTAATACCAATCATAATCGGAGGTTTCGGAAACTGACTAATCCCCCTAATGATCGGGGCACCCGATATGGCATTCCCTCGAATGAACAACATGAGCTTTTGGCTTCTCCCTCCTTCCTTTCTTCTCCTCCTCGCATCTTCTGGAGTAGAGGCCGGAGCGGGGACAGGATGAACTGTTTATCCTCCCCTGGCCAGCAACCTGGCCCATGCCGGAGCTTCCGTTGATTTAACCATCTTCTCTCTTCACCTGGCCGGGGTTTCCTCAATTCTAGGTGCAATTAATTTTATTACAACCATTATTAATATGAAACCTCCCGCAATTTCTCAGTACCAAACACCGCTATTCGTGTGGGCCGTCCTAATTACTGCTGTCCTTCTTCTTTTATCATTACCAGTCTTGGCTGCCGGCATTACTATGCTCCTTACAGACCGAAATTTAAACACCTCTTTCTTCGACCCTGCGGGAGGCGGAGATCCTATTTTATATCAACACCT
>gi|381281979|gb|JQ060411.1| Chelon labrosus isolate 179b cytochrome oxidase subunit I (COI) gene, partial cds; mitochondrial
TGCTTATCCGAGCAGAACTAAGCCAACCCGGTGCTCTCCTAGGAGACGACCAAATTTATAATGTAATTGTTACGGCACACGCTTTCGTAATAATTTTCTTTATAGTAATACCAATTATGATTGGAGGGTTTGGAAACTGACTAGTCCCCTTAATGATCGGTGCCCCCGACATAGCCTTCCCTCGAATAAACAACATAAGCTTTTGACTCCTTCCCCCTTCATTTCTTCTTCTCTTAGCATCCTCTGGCGTAGAAGCAGGAGCAGGTACTGGATGAACCGTATACCCTCCCCTAGCCAGCAATTTAGCGCATGCCGGGGCATCCGTCGACCTAACAATCTTCTCCCTCCACCTAGCAGGTGTCTCCTCAATTTTAGGTGCTATTAACTTCATCACAACTATTATCAACATGAAACCTCCCGCGATCTCCCAATATCAGACCCCTCTGTTCGTGTGAGCCGTCCTTATCACCGCCGTCCTTCTCCTCTTATCTCTGCCAGTTCTTGCTGCCGGAATCACCATGCTCCTAACAGATCGGAACTTAAATACCTCTTTCTTCGACCCAGCGGGAGGAGGAGATCCCATCTTGTACCAACACCT
>gi|381281981|gb|JQ060412.1| Chelon labrosus isolate 180 cytochrome oxidase subunit I (COI) gene, partial cds; mitochondrial
TGCTTATCCGAGCAGAACTAAGCCAACCCGGTGCTCTCCTAGGAGACGACCAAATTTATAATGTAATTGTTACGGCACACGCTTTCGTAATAATTTTCTTTATAGTAATACCAATTATGATTGGAGGGTTTGGAAACTGACTAGTCCCCTTAATGATCGGTGCCCCCGACATAGCCTTCCCTCGAATAAACAACATAAGCTTTTGACTCCTTCCCCCTTCATTTCTTCTTCTCTTAGCATCCTCTGGCGTAGAAGCAGGAGCAGGTACTGGATGAACCGTATACCCTCCCCTAGCCAGCAATTTAGCGCATGCCGGGGCATCCGTCGACCTAACAATCTTCTCCCTCCACCTAGCAGGTGTCTCCTCAATTTTAGGTGCTATTAACTTCATCACAACTATTATCAACATGAAACCTCCCGCGATCTCCCAATATCAGACCCCTCTGTTCGTGTGAGCCGTCCTTATCACCGCCGTCCTTCTCCTCTTATCTCTGCCAGTTCTTGCTGCCGGAATCACCATGCTCCTAACAGATCGGAACTTAAATACCTCTTTCTTCGACCCAGCGGGAGGAGGAGATCCCATCTTGTACCAACACCT
>gi|381281983|gb|JQ060413.1| Liza macrolepis isolate 154 cytochrome oxidase subunit I (COI) gene, partial cds; mitochondrial
TGCTTATCCGAGCAGAACTAAGCCAACCTGGCGCTCTCCTAGGGGACGACCAAATTTATAATGTAATTGTTACAGCACACGCTTTCGTAATAATTTTCTTTATAGTAATGCCAATCATGATTGGGGGATTTGGAAACTGACTAGTCCCTCTAATGATTGGGGCTCCCGACATGGCCTTCCCTCGAATGAACAACATAAGCTTTTGACTCCTCCCTCCTTCATTCCTCCTTCTCCTAGCCTCCTCTGGTGTAGAGGCAGGGGCCGGCACTGGATGAACCGTCTACCCTCCTCTAGCCAGCAACTTGGCACATGCCGGAGCATCCGTCGACCTGACAATTTTCTCCCTTCATTTAGCAGGTGTTTCCTCAATTTTAGGTGCTATTAACTTCATTACGACTATCATTAATATGAAACCCCCCGCAATTTCCCAATACCAGACCCCTCTCTTTGTATGAGCCGTCCTAATCACTGCTGTCCTTCTCCTTCTGTCCCTGCCAGTTCTTGCTGCCGGAATTACTATGCTCCTAACAGACCGAAATCTGAACACCTCTTTCTTTGACCCAGCAGGAGGAGGGGACCCCATTCTTTATCAACATCT
>gi|381281985|gb|JQ060414.1| Liza macrolepis isolate 124 cytochrome oxidase subunit I (COI) gene, partial cds; mitochondrial
TGCTTATCCGAGCAGAACTAAGCCAACCTGGCGCTCTCCTAGGGGACGACCAAATTTATAATGTAATTGTTACAGCACACGCTTTCGTAATAATTTTCTTTATAGTAATGCCAATCATGATCGGGGGATTTGGAAACTGACTAGTCCCTCTAATGATTGGGGCTCCCGACATGGCCTTCCCTCGAATGAACAACATAAGCTTTTGACTCCTCCCTCCTTCATTCCTCCTTCTCCTAGCCTCCTCTGGCGTAGAGGCAGGGGCCGGCACTGGATGAACCGTCTACCCTCCCCTAGCCAGCAACTTGGCACACGCCGGAGCATCCGTCGACCTAACAATTTTCTCCCTTCATTTAGCAGGTGTTTCCTCAATTTTAGGTGCTATTAACTTCATCACAACTATCATTAATATGAAACCCCCTGCAATTTCCCAATACCAGACCCCTCTCTTTGTATGAGCCGTCCTAATCACTGCTGTCCTTCTTCTTCTATCCCTGCCAGTTCTTGCTGCCGGAATTACTATGCTCCTAACAGACCGAAATCTGAACACCTCTTTCTTCGACCCAGCAGGAGGAGGGGACCCTATTCTTTATCAACATCT
>gi|381281987|gb|JQ060415.1| Liza macrolepis isolate 132 cytochrome oxidase subunit I (COI) gene, partial cds; mitochondrial
TGCTTATCCGAGCAGAACTAAGCCAACCTGGCGCTCTCCTAGGGGACGACCAAATTTATAATGTAATTGTTACAGCACACGCTTTCGTAATAATTTTCTTTATAGTAATGCCAATCATGATCGGGGGATTTGGAAACTGACTAGTCCCTCTAATGATTGGGGCTCCCGACATGGCCTTCCCTCGAATAAACAACATAAGCTTTTGACTCCTCCCTCCCTCATTCCTCCTTCTCCTAGCCTCCTCTGGCGTAGAGGCAGGGGCCGGCACTGGATGAACCGTCTACCCTCCCCTAGCCAGCAACTTGGCACATGCCGGAGCATCCGTCGACCTAACAATTTTCTCCCTTCATTTAGCAGGTGTTTCCTCAATTTTAGGTGCTATTAACTTCATCACAACTATCATTAATATGAAACCCCCCGCAATTTCCCAATACCAGACCCCTCTCTTTGTATGAGCCGTCCTAATCACTGCTGTCCTTCTTCTTCTGTCCCTGCCAGTTCTTGCTGCCGGAATTACTATGCTCCTAACAGACCGAAATCTGAACACCTCTTTCTTCGACCCAGCAGGAGGAGGGGACCCCATTCTTTATCAACATCT
>gi|381281989|gb|JQ060416.1| Liza macrolepis isolate 133 cytochrome oxidase subunit I (COI) gene, partial cds; mitochondrial
TGCTTATCCGGGCAGAACTAAGCCAACCTGGCGCTCTCCTAGGGGACGACCAAATTTATAATGTAATTGTTACAGCACACGCTTTCGTAATAATTTTCTTTATAGTAATGCCAATCATGATCGGGGGATTTGGAAACTGACTAGTCCCTCTAATGATTGGGGCTCCCGACATGGCCTTCCCTCGAATAAACAACATAAGCTTTTGACTCCTCCCTCCCTCATTCCTCCTTCTCCTAGCCTCCTCTGGCGTAGAGGCAGGGGCCGGCACTGGATGAACCGTCTACCCTCCCCTAGCCAGCAACTTGGCACATGCCGGAGCATCCGTCGACCTAACAATTTTCTCCCTTCATTTAGCAGGTGTTTCCTCAATTTTAGGTGCTATTAACTTCATCACAACTATCATTAATATGAAACCCCCCGCAATTTCCCAATACCAGACCCCTCTCTTTGTATGAGCCGTCCTAATCACTGCTGTCCTTCTTCTTCTGTCCCTGCCAGTTCTTGCTGCCGGAATTACTATGCTCCTAACAGACCGAAATCTGAACACCTCTTTCTTCGACCCAGCAGGAGGAGGGGACCCCATTCTTTATCAACATCT
>gi|381281991|gb|JQ060417.1| Liza macrolepis isolate 135 cytochrome oxidase subunit I (COI) gene, partial cds; mitochondrial
TGCTTATCCGGGCAGAACTAAGCCAACCTGGCGCTCTCCTAGGGGACGACCAAATTTATAATGTAATTGTTACAGCACACGCTTTCGTAATAATTTTCTTTATAGTAATGCCAATCATGATCGGGGGATTTGGAAACTGACTAGTCCCTCTAATGATTGGGGCTCCCGACATGGCCTTCCCTCGAATAAACAACATAAGCTTTTGACTCCTCCCTCCCTCATTCCTCCTTCTCCTAGCCTCCTCTGGCGTAGAGGCAGGGGCCGGCACTGGATGAACCGTCTACCCTCCCCTAGCCAGCAACTTGGCACATGCCGGAGCATCCGTCGACCTAACAATTTTCTCCCTTCATTTAGCAGGTGTTTCCTCAATTTTAGGTGCTATTAACTTCATCACAACTATCATTAATATGAAACCCCCCGCAATTTCCCAATACCAGACCCCTCTCTTTGTATGAGCCGTCCTAATCACTGCTGTCCTTCTTCTTCTGTCCCTGCCAGTTCTTGCTGCCGGAATTACTATGCTCCTAACAGACCGAAATCTGAACACCTCTTTCTTCGACCCAGCAGGAGGAGGGGACCCCATTCTTTATCAACATCT
>gi|381281993|gb|JQ060418.1| Liza macrolepis isolate 136 cytochrome oxidase subunit I (COI) gene, partial cds; mitochondrial
TGCTTATCCGAGCAGAACTAAGCCAACCTGGCGCTCTCCTAGGGGACGACCAAATTTATAATGTAATTGTTACAGCACACGCTTTCGTAATAATTTTCTTTATAGTAATGCCAATCATGATCGGGGGATTTGGAAACTGACTAGTCCCTCTAATGATTGGGGCTCCCGACATGGCCTTCCCTCGAATAAACAACATAAGCTTTTGACTCCTCCCTCCCTCATTCCTCCTTCTCCTAGCCTCCTCTGGCGTAGAGGCAGGGGCCGGCACTGGATGAACCGTCTACCCTCCCCTAGCCAGCAACTTGGCACATGCCGGAGCATCCGTCGACCTAACAATTTTCTCCCTTCATTTAGCAGGTGTTTCCTCAATTTTAGGTGCTATTAACTTCATCACAACTATCATTAATATGAAACCCCCCGCAATTTCCCAATACCAGACCCCTCTCTTTGTATGAGCCGTCCTAATCACTGCTGTCCTTCTTCTTCTGTCCCTGCCAGTTCTTGCTGCCGGAATTACTATGCTCCTAACAGACCGAAATCTGAACACCTCTTTCTTCGACCCAGCAGGAGGAGGGGACCCCATTCTTTATCAACATCT
>gi|381281995|gb|JQ060419.1| Liza macrolepis isolate 137 cytochrome oxidase subunit I (COI) gene, partial cds; mitochondrial
TGCTTATCCGGGCAGAACTAAGCCAACCTGGCGCTCTCCTAGGGGACGACCAAATTTATAATGTAATTGTTACAGCACACGCTTTCGTAATAATTTTCTTTATAGTAATGCCAATCATGATCGGGGGATTTGGAAACTGACTAGTCCCTCTAATGATTGGGGCTCCCGACATGGCCTTCCCTCGAATAAACAACATAAGCTTTTGACTCCTCCCTCCCTCATTCCTCCTTCTCCTAGCCTCCTCTGGCGTAGAGGCAGGGGCCGGCACTGGATGAACCGTCTACCCTCCCCTAGCCAGCAACTTGGCACATGCCGGAGCATCCGTCGACCTAACAATTTTCTCCCTTCATTTAGCAGGTGTTTCCTCAATTTTAGGTGCTATTAACTTCATCACAACTATCATTAATATGAAACCCCCCGCAATTTCCCAATACCAGACCCCTCTCTTTGTATGAGCCGTCCTAATCACTGCTGTCCTTCTTCTTCTGTCCCTGCCAGTTCTTGCTGCCGGAATTACTATGCTCCTAACAGACCGAAATCTGAACACCTCTTTCTTCGACCCAGCAGGAGGAGGGGACCCCATTCTTTATCAACATCT
>gi|381281997|gb|JQ060420.1| Liza macrolepis isolate 138 cytochrome oxidase subunit I (COI) gene, partial cds; mitochondrial
TGCTTATCCGGGCAGAACTAAGCCAACCTGGCGCTCTCCTAGGGGACGACCAAATTTATAATGTAATTGTTACAGCACACGCTTTCGTAATAATTTTCTTTATAGTAATGCCAATCATGATCGGGGGATTTGGAAACTGACTAGTCCCTCTAATGATTGGGGCTCCCGACATGGCCTTCCCTCGAATAAACAACATAAGCTTTTGACTCCTCCCTCCCTCATTCCTCCTTCTCCTAGCCTCCTCTGGCGTAGAGGCAGGGGCCGGCACTGGATGAACCGTCTACCCTCCCCTAGCCAGCAACTTGGCACATGCCGGAGCATCCGTCGACCTAACAATCTTCTCCCTTCATTTAGCAGGTGTTTCCTCAATTTTAGGTGCTATTAACTTCATCACAACTATCATTAATATGAAACCCCCCGCAATTTCCCAATACCAGACCCCTCTCTTTGTATGAGCCGTCCTAATCACTGCTGTCCTTCTTCTTCTGTCCCTGCCAGTTCTTGCTGCCGGAATTACTATGCTCCTAACAGACCGAAATCTGAACACCTCTTTCTTCGACCCAGCAGGAGGAGGGGACCCCATTCTTTATCAACATCT
>gi|381281999|gb|JQ060421.1| Liza macrolepis isolate 143 cytochrome oxidase subunit I (COI) gene, partial cds; mitochondrial
TGCTTATCCGAGCAGAACTAAGCCAACCTGGCGCTCTCCTAGGGGACGACCAAATTTATAATGTAATTGTTACAGCACACGCTTTCGTAATAATTTTCTTTATAGTAATGCCAATCATGATCGGGGGATTTGGAAACTGACTGGTCCCTCTAATGATTGGGGCTCCCGACATGGCCTTCCCTCGAATGAACAACATAAGCTTTTGACTCCTCCCTCCTTCATTCCTCCTTCTCCTAGCCTCCTCTGGCGTAGAGGCAGGGGCCGGAACTGGATGAACCGTCTACCCTCCCCTAGCCAGCAACTTGGCACATGCCGGAGCATCCGTCGACCTAACAATTTTCTCCCTTCATTTAGCAGGTGTTTCCTCAATTTTAGGTGCTATTAATTTCATCACAACTATCATTAATATGAAACCCCCTGCAATTTCCCAATACCAGACCCCTCTCTTTGTATGAGCCGTCCTAATCACTGCTGTCCTTCTTCTTCTATCCCTGCCAGTTCTTGCTGCCGGAATTACTATGCTCCTAACAGACCGAAATCTGAACACCTCTTTCTTCGACCCAGCAGGAGGAGGGGACCCTATTCTTTATCAACATCT
>gi|381282001|gb|JQ060422.1| Liza macrolepis isolate 144 cytochrome oxidase subunit I (COI) gene, partial cds; mitochondrial
TGCTTATCCGAGCAGAACTAAGCCAACCTGGCGCTCTCCTAGGAGACGACCAGATTTATAATGTAATTGTTACAGCACACGCTTTCGTAATAATTTTCTTTATAGTAATGCCAATCATGATCGGGGGATTTGGAAACTGGCTAGTCCCTCTAATGATTGGGGCCCCCGATATGGCCTTCCCTCGAATGAACAACATAAGCTTTTGACTTCTCCCTCCTTCATTCCTCCTCCTCCTAGCCTCCTCTGGTGTAGAGGCAGGTGCCGGCACTGGATGAACCGTCTACCCTCCCCTAGCCAGCAACTTGGCACATGCCGGGGCATCCGTCGACCTGACAATTTTCTCCCTTCATTTAGCAGGTGTCTCCTCAATTTTAGGTGCTATTAACTTCATCACAACCATCATTAATATGAAACCTCCCGCAATTTCCCAATATCAAACCCCTCTCTTTGTATGGGCCGTCCTAATTACTGCTGTTCTTCTTCTTCTGTCTCTGCCGGTTCTTGCTGCCGGAATTACTATGCTCCTAACAGACCGAAATCTGAACACCTCTTTCTTCGACCCAGCAGGAGGAGGGGACCCCATTCTTTATCAACACCT
>gi|381282003|gb|JQ060423.1| Liza macrolepis isolate 145 cytochrome oxidase subunit I (COI) gene, partial cds; mitochondrial
TGCTTATCCGAGCAGAACTAAGCCAACCTGGCGCTCTCCTAGGAGACGACCAGATTTATAATGTAATTGTTACAGCACACGCTTTCGTAATAATTTTCTTTATAGTAATGCCAATCATGATCGGGGGATTTGGAAACTGGCTAGTCCCTCTAATGATTGGGGCCCCCGATATGGCCTTCCCTCGAATGAACAACATAAGCTTTTGACTTCTCCCTCCTTCATTCCTCCTCCTCCTAGCCTCCTCTGGTGTAGAGGCAGGTGCCGGCACTGGATGAACCGTCTACCCTCCCCTAGCCAGCAACTTGGCACATGCCGGGGCATCCGTCGACCTGACAATTTTCTCCCTTCATTTAGCAGGTGTCTCCTCAATTTTAGGTGCTATTAACTTCATCACAACCATCATTAATATGAAACCTCCCGCAATTTCCCAATATCAAACCCCTCTCTTTGTATGGGCCGTCCTAATTACTGCTGTTCTTCTTCTTCTGTCTCTGCCGGTTCTTGCTGCCGGAATTACTATGCTCCTAACAGACCGAAATCTGAACACCTCTTTCTTCGACCCAGCAGGAGGAGGGGACCCCATTCTTTATCAACACCT
>gi|381282005|gb|JQ060424.1| Liza macrolepis isolate 146 cytochrome oxidase subunit I (COI) gene, partial cds; mitochondrial
TGCTTATCCGAGCAGAACTAAGCCAACCTGGCGCTCTCCTAGGGGACGACCAAATTTATAATGTAATTGTTACAGCACACGCTTTCGTAATAATTTTCTTTATAGTAATGCCAATCATGATTGGGGGATTTGGAAACTGACTAGTCCCTCTAATGATTGGGGCTCCCGACATGGCCTTCCCTCGAATGAACAACATAAGCTTTTGACTCCTCCCTCCTTCATTCCTCCTTCTCCTAGCCTCCTCTGGTGTAGAGGCAGGGGCCGGCACTGGATGAACCGTCTACCCTCCTCTAGCCAGCAACTTGGCACATGCCGGAGCATCCGTCGACCTGACAATTTTCTCCCTTCATTTAGCAGGTGTTTCCTCAATTTTAGGTGCTATTAACTTCATTACGACTATCATTAATATGAAACCCCCCGCAATTTCCCAATACCAGACCCCTCTCTTTGTATGAGCCGTCCTAATCACTGCTGTCCTTCTCCTTCTGTCCCTGCCAGTTCTTGCTGCCGGAATTACTATGCTCCTAACAGACCGAAATCTGAACACCTCTTTCTTTGACCCAGCAGGAGGAGGGGACCCCATTCTTTATCAACATCT
>gi|381282007|gb|JQ060425.1| Liza macrolepis isolate 150 cytochrome oxidase subunit I (COI) gene, partial cds; mitochondrial
TGCTTATCCGAGCAGAACTAAGCCAACCTGGCGCTCTCCTAGGAGACGACCAGATTTATAATGTAATTGTTACAGCACACGCTTTCGTAATAATTTTCTTTATAGTAATGCCAATCATGATCGGGGGATTTGGAAACTGGCTAGTCCCTCTAATGATTGGGGCCCCCGATATGGCCTTCCCTCGAATGAACAACATAAGCTTTTGACTTCTCCCTCCTTCATTCCTCCTCCTCCTAGCCTCCTCTGGTGTAGAGGCAGGTGCCGGCACTGGATGAACCGTCTACCCTCCCCTAGCCAGCAACTTGGCACATGCCGGGGCATCCGTCGACCTGACAATTTTCTCCCTTCATTTAGCAGGTGTCTCCTCAATTTTAGGTGCTATTAACTTCATCACAACCATCATTAATATGAAACCTCCCGCAATTTCCCAATATCAAACCCCTCTCTTTGTATGGGCCGTCCTAATTACTGCTGTTCTTCTTCTTCTGTCTCTGCCGGTTCTTGCTGCCGGAATTACTATGCTCCTAACAGACCGAAATCTGAACACCTCTTTCTTCGACCCAGCAGGAGGAGGGGACCCCATTCTTTATCAACACCT
>gi|381282009|gb|JQ060426.1| Liza macrolepis isolate 151 cytochrome oxidase subunit I (COI) gene, partial cds; mitochondrial
TGCTTATCCGAGCAGAACTAAGCCAACCTGGCGCTCTCCTAGGAGACGACCAGATTTATAATGTAATTGTTACAGCACACGCTTTCGTAATAATTTTCTTTATAGTAATGCCAATCATGATCGGGGGATTTGGAAACTGGCTAGTCCCTCTAATGATTGGGGCCCCCGATATGGCCTTCCCTCGAATGAACAACATAAGCTTTTGACTTCTCCCTCCTTCATTCCTCCTCCTCCTAGCCTCCTCTGGTGTAGAGGCAGGTGCCGGCACTGGATGAACCGTCTACCCTCCCCTAGCCAGCAACTTGGCACATGCCGGGGCATCCGTCGACCTGACAATTTTCTCCCTTCATTTAGCAGGTGTCTCCTCAATTTTAGGTGCTATTAACTTCATCACAACCATCATTAATATGAAACCTCCCGCAATTTCCCAATATCAAACCCCTCTCTTTGTATGGGCCGTCCTAATTACTGCTGTTCTTCTTCTTCTGTCTCTGCCGGTTCTTGCTGCCGGAATTACTATGCTCCTAACAGACCGAAATCTGAACACCTCTTTCTTCGACCCAGCAGGAGGAGGGGACCCCATTCTTTATCAACACCT
>gi|381282011|gb|JQ060427.1| Liza melinoptera isolate 109 cytochrome oxidase subunit I (COI) gene, partial cds; mitochondrial
TGCTTATCCGGGCAGAACTAAGCCAACCTGGCGCTCTCCTAGGTGACGATCAGATTTATAATGTAATCGTTACAGCACACGCTTTCGTAATAATTTTCTTTATAGTAATGCCAATCATGATCGGAGGATTTGGAAATTGACTGGTCCCCCTAATGATCGGCGCCCCTGACATAGCCTTCCCTCGAATGAACAACATAAGCTTCTGACTCCTTCCTCCCTCATTCCTTCTCCTGTTGGCATCCTCTGGTGTAGAAGCAGGGGCCGGAACTGGATGAACTGTTTACCCTCCCCTGGCCAGCAACCTAGCACATGCCGGAGCATCAGTTGACTTAACAATCTTCTCCCTACATCTAGCAGGTGTTTCCTCAATTTTAGGTGCTATTAATTTCATTACTACTATTATTAACATGAAACCCCCTGCAATTTCCCAATATCAGACTCCGCTTTTCGTGTGGGCTGTTCTTATTACTGCCGTCCTCCTTCTCCTATCACTGCCAGTTCTCGCCGCCGGAATTACCATGCTCTTAACAGATCGAAACTTAAACACTTCTTTCTTCGACCCAGCAGGAGGAGGGGATCCTATTCTTTATCAACACTT
>gi|381282013|gb|JQ060428.1| Liza melinoptera isolate 111 cytochrome oxidase subunit I (COI) gene, partial cds; mitochondrial
TGCTTATCCGGGCAGAACTAAGCCAACCTGGCGCTCTCCTAGGTGACGATCAGATTTATAATGTAATCGTTACAGCACACGCTTTCGTAATAATTTTCTTTATAGTAATGCCAATCATGATCGGAGGATTTGGAAATTGACTGGTCCCCCTAATGATCGGCGCCCCTGACATAGCCTTCCCTCGAATGAACAACATAAGCTTCTGACTCCTTCCTCCCTCATTCCTTCTCCTGTTGGCATCCTCTGGTGTAGAAGCAGGGGCCGGAACTGGATGAACTGTTTACCCTCCCCTGGCCAGCAACCTAGCACATGCCGGAGCATCAGTTGACTTAACAATCTTCTCCCTACATCTAGCAGGTGTTTCCTCAATTTTAGGTGCTATTAATTTCATTACTACTATTATTAACATGAAACCCCCTGCAATTTCCCAATATCAGACTCCGCTTTTCGTGTGGGCTGTTCTTATTACTGCCGTCCTCCTTCTCCTATCACTGCCAGTTCTCGCCGCCGGAATTACCATGCTCTTAACAGATCGAAACTTAAACACTTCTTTCTTCGACCCAGCAGGAGGAGGGGATCCTATTCTTTATCAACACTT
>gi|381282015|gb|JQ060429.1| Liza planiceps isolate 122 cytochrome oxidase subunit I (COI) gene, partial cds; mitochondrial
TACTTATCCGGGCGGAACTGAGCCAACCTGGTGCTCTCCTAGGAGACGACCAGATTTATAATGTAATCGTTACAGCACACGCTTTCGTAATAATTTTCTTTATAGTAATACCAATTATGATCGGAGGGTTTGGAAACTGACTAATTCCTCTAATGATCGGCGCCCCTGATATGGCCTTCCCTCGAATAAACAACATAAGCTTCTGACTTCTTCCCCCTTCATTCCTCCTCCTGTTAGCATCCTCTGGTGTAGAAGCAGGGGCCGGAACTGGGTGAACCGTTTACCCTCCCCTAGCCAGCAACCTGGCACACGCCGGTGCATCAGTTGACTTAACAATTTTCTCTCTTCACTTGGCAGGTGTTTCCTCAATTTTAGGTGCCATTAATTTCATTACTACTATTATTAACATGAAACCCCCCGCAATTTCCCAATACCAAACTCCGCTCTTCGTATGGGCTGTTCTCATTACTGCCGTCCTCCTTCTCTTATCCCTGCCGGTTCTTGCTGCCGGAATTACTATACTCCTAACAGATCGAAACTTAAACACTTCTTTCTTCGACCCAGCAGGAGGAGGGGATCCCATTCTATATCAACATCT
>gi|381282017|gb|JQ060430.1| Liza planiceps isolate 175 cytochrome oxidase subunit I (COI) gene, partial cds; mitochondrial
TACTTATCCGAGCAGAACTAAGCCAACCTGGCGCTCTCCTGGGAGATGACCAGATTTATAATGTTATTGTTACAGCGCACGCTTTTGTAATAATTTTCTTTATAGTAATACCAATTATGATTGGTGGGTTTGGAAATTGATTAGTCCCCCTAATAATTGGCGCCCCCGACATAGCTTTCCCCCGAATAAATAACATAAGCTTCTGACTCCTCCCTCCCTCATTTCTACTCCTTTTAGCCTCCTCTACTGTAGAAGCAGGGGCTGGTACCGGGTGAACAGTTTACCCACCTCTTGCCAGCAACTTAGCACACGCCGGGGCATCAGTTGACTTAACGATCTTCTCCCTTCATTTAGCAGGTGTATCCTCAATCTTAGGTGCCATTAATTTCATCACAACTATTATTAATATGAAACCTCCTGCAATTTCTCAATATCAAACCCCTCTCTTCGTATGGGCCGTTCTTATTACTGCTGTCCTCCTCCTCCTATCCCTGCCAGTTCTTGCTGCCGGAATTACTATGCTCCTAACAGACCGAAACCTAAATACCTCTTTCTTTGACCCAGCAGGAGGAGGAGACCCCATTCTATATCAACACCTATTCTGATTCTTCGGGCACCCAGAGGTATACATTCTGATCCTCCCCGGGTTCGGTATAATCTCTCATATCGTTGCATACTACGCAGGTAAAAAAGAACCTTTCGGCTATATGGGCATGGTCTGAGCTATAATAGCAATTGGCCTTCTAGGCTTCATTGTATGAGCACATCATATGTTTACAGTAGGCATAGATGTAGACACTCGCGCTTACTTCACATCCGCTACAATAATTATCGCCATCCCAACGGGCGTGAAAGTCTTCAGCTGGCTGGCAACCCTTCACGGAGGGTCCCTAAAATGAGAAACACCTCTTCTCTGGGCCTTAGGGTTCATTTTCCTCTTTACAGTAGGAGGCCTTACAGGAATCGTACTAGCTAATTCTTCCTTAGACATTGTTCTACATGATACATATTATGTCGTAGCACATTTCCACTACGTTCTCTCTATGGGTGCAGTCTTTGCCATTATGGGAGGTTTTGTCCACTGATTCCCTCTGTTCTCTGGCTATACCCTACATGGGACATGAACGAAAATCCACTTTGGAGTAATATTTGTAGGTGTAAACCTAACCTTCTTCCCACAACACTTCCTAGGACTGGCCGGCATGCCTCGACGGTACTCCGACTACCCAGACGCCTACACCCTCTGAAATACTGTCTCCTCTATAGGCTCCCTAATCTCCCTAGTGGCAGTAATTATGTTCCTTTACATTATTTGAGAAGCATTTGCTGCTAAACGAGAAGTCTTATCAGTAGAACTTACCGCCACAAATGTAGAATGACTACATGGATGTCCTCCCCCTTACCA
>gi|381282019|gb|JQ060431.1| Liza planiceps isolate 176 cytochrome oxidase subunit I (COI) gene, partial cds; mitochondrial
TACTTATCCGAGCAGAACTAAGCCAACCTGGCGCTCTCCTGGGAGATGACCAGATTTATAATGTTATTGTTACAGCGCACGCTTTTGTAATAATTTTCTTTATAGTAATACCAATTATGATTGGTGGGTTTGGAAATTGATTAGTCCCCCTAATAATTGGCGCCCCCGACATAGCTTTCCCCCGAATAAATAACATAAGCTTCTGACTCCTCCCTCCCTCATTTCTACTCCTTTTAGCCTCCTCTACTGTAGAAGCAGGGGCTGGTACCGGGTGAACAGTTTACCCACCTCTTGCCAGCAACTTAGCACACGCCGGGGCATCAGTTGACTTAACGATCTTCTCCCTTCATTTAGCAGGTGTATCCTCAATCTTAGGTGCCATTAATTTCATCACAACTATTATTAATATGAAACCTCCTGCAATTTCTCAATATCAAACCCCTCTCTTCGTATGGGCCGTTCTTATTACTGCTGTCCTCCTCCTCCTATCCCTGCCAGTTCTTGCTGCCGGAATTACTATGCTCCTAACAGACCGAAACCTAAATACCTCTTTCTTTGACCCAGCAGGAGGAGGAGACCCCATTCTATATCAACACCT
>gi|381282021|gb|JQ060432.1| Liza subviridis isolate 64 cytochrome oxidase subunit I (COI) gene, partial cds; mitochondrial
TACTAATCCGAGCAGAACTAAGCCAACCTGGCGCTCTCTTAGGAGATGACCAAATTTATAATGTAATTGTTACGGCGCACGCTTTCGTAATAATTTTCTTTATAGTAATGCCAATCATGATCGGAGGATTTGGGAACTGACTAGTCCCTCTAATGATCGGTGCCCCCGATATGGCCTTCCCTCGAATGAACAACATAAGCTTCTGACTCCTCCCTCCTTCCTTCCTTCTTCTCCTGGCATCCTCTGGCGTAGAAGCTGGGGCCGGTACTGGGTGAACCGTCTACCCCCCTCTGGCCAGCAACTTAGCACATGCCGGAGCATCTGTTGACCTAACAATTTTCTCCCTCCATCTGGCGGGGGTTTCCTCAATTCTAGGCGCAATTAACTTCATTACAACCATCATCAATATGAAACCTCCAGCTATCTCCCAATACCAGACCCCTCTCTTCGTATGGGCCGTCCTTATCACTGCTGTCCTCCTTCTCCTATCCCTACCAGTTCTTGCTGCTGGAATTACCATGCTCCTGACAGACCGAAACTTAAACACCTCTTTCTTCGACCCGGCAGGAGGAGGAGATCCTATCTTGTATCAACACTT
>gi|381282023|gb|JQ060433.1| Liza subviridis isolate 69 cytochrome oxidase subunit I (COI) gene, partial cds; mitochondrial
AACTAATCCGAGCAGAACTAAGCCAACCTGGCGCTCTCTTAGGAGATGATCAAATTTATAATGTAATTGTTACGGCACACGCTTTCGTAATAATTTTCTTTATAGTAATACCAATCATGATCGGAGGATTTGGGAACTGACTAGTCCCTCTAATGATCGGTGCCCCCGATATGGCCTTCCCTCGAATGAACAACATAAGCTTCTGACTCCTCCCTCCTTCCTTCCTTCTTCTCCTGGCATCCTCTGGCGTAAAAGCTGGAGCCGGTACTGGGTGAACCGTCTACCCCCCTCTGGCCAGCAACTTAGCACATGCCGGAGCATCCGTTGACCTAACAATTTTCTCCCTCCATCTGGCGGGGGTCTCCTCAATTCTAGGCGCAATTAACTTCATTACAACCATCATCAACATGAAACCTCCAGCTATCTCCCAATACCAGACCCCTCTCTTCGTATGGGCCGTCCTTATCACTGCTGTTCTCCTTCTCCTATCCCTACCAGTTCTTGCTGCTGGAATTACCATGCTCCTGACAGACCGAAACTTAAACACCTCTTTCTTCGACCCGGCAGGAGGAGGAGACCCTATCTTGTATCAACACTT
>gi|381282025|gb|JQ060434.1| Liza subviridis isolate 70 cytochrome oxidase subunit I (COI) gene, partial cds; mitochondrial
TACTAATCCGAGCAGAACTAAGCCAACCTGGCGCTCTCTTAGGAGATGATCAAATTTATAATGTAATTGTTACGGCACACGCTTTCGTAATAATTTTCTTTATAGTAATGCCAATCATGATCGGAGGGTTTGGGAACTGACTAGTCCCCTTAATGATCGGTGCCCCCGATATGGCCTTCCCTCGAATGAACAACATAAGCTTCTGACTCCTCCCTCCTTCCTTCCTTCTTCTCCTGGCATCCTCTGGCGTAGAAGCTGGAGCCGGTACTGGGTGAACCGTCTACCCCCCTCTGGCCGGCAACTTAGCACATGCCGGAGCATCCGTTGACCTAACAATTTTCTCCCTCCATCTGGCGGGGGTCTCCTCAATTCTAGGCGCAATTAACTTCATTACAACCATCATCAATATGAAACCTCCAGCTATCTCCCAATACCAGACCCCTCTCTTCGTATGGGCCGTCCTTATCACTGCTGTCCTCCTTCTCCTATCCCTACCAGTTCTTGCTGCTGGAATTACCATGCTCCTGACAGACCGAAACTTAAATACCTCTTTCTTCGACCCGGCAGGAGGAGGAGATCCTATCTTGTATCAACACTT
>gi|381282027|gb|JQ060435.1| Crenimugil crenilabis isolate 185 cytochrome oxidase subunit I (COI) gene, partial cds; mitochondrial
TTCTCATCCGAGCAGAACTAAGCCAACCTGGCGCTCTCCTAGGGGACGACCAGATCTATAATGTAATCGTAACTGCTCACGCCTTCGTGATGATTTTCTTTATAGTAATACCAATCATGATTGGAGGGTTCGGAAATTGACTTGTCCCTTTAATGATCGGCGCACCARACATAGCATTTCCTCGAATAAACAACATGAGCTTTTGACTCCTTCCCCCATCATTCCTCCTTCTCTTAGCGTCATCAGCAGTTGAAGCAGGGGCTGGAACAGGATGAACTGTCTACCCGCCGCTCGCTAGCAATTTAGCACACGCCGGAGCGTCCGTCGACTTAACCATTTTCTCCCTTCATCTGGCAGGKGTCTCCTCAATTTTAGGCGCCATCAATTTTATTACGACTATTATTAACATGAAACCCCCTGCAATCTCTCAATACCAAACCCCCCTCTTCGTATGGGCAGTTCTTATCACGGCCGTCCTTCTTCTCCTGTCCCTCCCAGTTCTTGCTGCTGGAATCACAATACTCCTGACAGATCGAAACCTAAACACCTCCTTCTTTGACCCTGCAGGAGGAGGAGACCCAATTCTCTACCAACACCTATTCTGGTTCTTTGGACATCCAGAAGTCTACATCCTCATCCTTCCTGGCTTTGGCATGATCTCCCATATTGTCGCATACTATGCCGGCAAAAAAGAGCCTTTCGGCTACATAGGAATGGTATGAGCCATGATGGCCATCGGCCTACTAGGTTTCATCGTTTGAGCCCACCACATGTTTACTGTCGGTATGGACGTAGACACTCGTGCATACTTTACATCCGCCACAATAATCATTGCCATCCCAACAGGTGTAAAAGTCTTTAGCTGACTAGCAACCCTACACGGAGGGTCTGTGAAATGAGAAACGCCCCTCCTTTGAGCCCTAGGCTTCATCTTCCTATTCACAGTAGGCGGGCTCACAGGAATCGTCTTAGCCAACTCCTCACTAGACATCGTCCTACATGATACATACTATGTAGTAGCCCACTTCCACTACGTCCTCTCTATAGGCGCAGTATTTGCCATCATAGGAGGCTTCGTACACTGATTCCCACTATTCTCTGGCTATACCCTCCATGAAACATGAACAAAAATTCACTTTGGAGTAATGTTCGTGGGTGTCGACCTCACCTTCTTCCCACAACACTTCCTAGGGCTAGCAGGGATGCCCCGACGATACTCTGACTACCCAGACGCCTATACCCTTTGAAACACCATCTCTTCAATAGGCTCCCTANTCTCCCTAGTGGCGGT
>gi|381282029|gb|JQ060436.1| Crenimugil crenilabis isolate 187 cytochrome oxidase subunit I (COI) gene, partial cds; mitochondrial
TTCTTATCCGAGCAGAACTAAGCCAACCTGGCGCTCTCCTAGGGGACGACCAGATCTATAATGTAATCGTAACTGCTCACGCCTTCGTGATGATTTTCTTTATAGTAATACCAATCATGATTGGAGGGTTCGGAAATTGACTTGTCCCTTTAATGATCGGCGCACCAGACATAGCATTCCCTCGAATAAACAACATGAGCTTTTGACTCCTTCCCCCATCATTCCTCCTTCTCTTAGCGTCATCAGCAGTTGAAGCAGGGGCTGGAACAGGATGAACTGTCTACCCGCCGCTCGCTAGCAATTTAGCACACGCCGGAGCGTCCGTTGACTTAACCATTTTCTCCCTTCATCTGGCAGGTGTCTCCTCAATTTTAGGCGCCATCAATTTTATTACGACTATTATTAACATGAAACCCCCTGCAATCTCTCAATACCAAACCCCCCTCTTCGTATGGGCAGTTCTTATCACGGCCGTCCTTCTTCTCCTGTCCCTCCCAGTTCTTGCTGCTGGAATCACAATACTCCTGACAGATCGAAACCTAAACACCTCCTTCTTTGACCCTGCAGGAGGAGGAGACCCAATTCTCTACCAACACCT
>gi|381282031|gb|JQ060437.1| Crenimugil crenilabis isolate 190 cytochrome oxidase subunit I (COI) gene, partial cds; mitochondrial
TTCTTATCCGAGCAGAACTAAGCCAACCTGGCGCTCTCCTAGGGGACGACCAGATCTATAATGTAATCGTAACTGCTCACGCCTTCGTGATGATTTTCTTTATAGTAATACCAATCATGATTGGAGGGTTCGGAAATTGACTTGTCCCTTTAATGATCGGCGCACCAGACATAGCATTCCCTCGAATAAACAACATGAGCTTTTGACTCCTTCCCCCATCATTCCTCCTTCTCTTAGCGTCATCAGCAGTTGAAGCAGGGGCTGGAACAGGATGAACTGTCTACCCGCCGCTCGCTAGCAATTTAGCACACGCCGGAGCGTCCGTTGACTTAACCATTTTCTCCCTTCATCTGGCAGGTGTCTCCTCAATTTTAGGCGCCATCAATTTTATTACGACTATTATTAACATGAAACCCCCTGCAATCTCTCAATACCAAACCCCCCTCTTCGTATGGGCAGTTCTTATCACGGCCGTCCTTCTTCTCCTGTCCCTCCCAGTTCTTGCTGCTGGAATCACAATACTCCTGACAGATCGAAACCTAAACACCTCCTTCTTTGACCCTGCAGGAGGAGGAGACCCAATTCTCTACCAACACCT
>gi|381282033|gb|JQ060438.1| Crenimugil crenilabis isolate 191 cytochrome oxidase subunit I (COI) gene, partial cds; mitochondrial
TTCTCATCCGAGCAGAACTAAGCCAACCTGGCGCTCTCCTAGGGGACGACCAGATCTATAATGTAATCGTAACTGCTCACGCCTTCGTGATGATTTTCTTTATAGTAATACCAATCATGATTGGAGGGTTCGGAAATTGACTTGTCCCTTTAATGATCGGCGCACCAGACATAGCATTTCCTCGAATAAACAACATGAGCTTTTGACTCCTTCCCCCATCATTCCTCCTTCTCTTAGCGTCATCAGCAGTTGAAGCAGGGGCTGGAACAGGATGAACTGTCTACCCGCCGCTCGCTAGCAATTTAGCACACGCCGGAGCGTCCGTCGACTTAACCATTTTCTCCCTTCATCTGGCAGGTGTCTCCTCAATTTTAGGCGCCATCAATTTTATTACGACTATTATTAACATGAAACCCCCTGCAATCTCTCAATACCAAACCCCCCTCTTCGTATGGGCAGTTCTTATCACGGCCGTCCTTCTTCTCCTGTCCCTCCCAGTTCTTGCTGCTGGAATCACAATACTCCTGACAGATCGAAACCTAAACACCTCCTTCTTTGACCCTGCAGGAGGAGGAGACCCAATTCTCTACCAACACCT
>gi|381282035|gb|JQ060439.1| Crenimugil crenilabis isolate 192 cytochrome oxidase subunit I (COI) gene, partial cds; mitochondrial
TTCTCATCCGAGCAGAACTAAGCCAACCTGGCGCTCTCCTAGGGGACGACCAGATCTATAATGTAATCGTAACTGCTCACGCCTTCGTGATGATTTTCTTTATAGTAATACCAATCATGATTGGAGGGTTCGGAAATTGACTTGTCCCTTTAATGATCGGCGCACCAGACATAGCATTTCCTCGAATAAACAACATGAGCTTTTGACTCCTTCCCCCATCATTCCTCCTTCTCTTAGCGTCATCAGCAGTTGAAGCAGGGGCTGGAACAGGATGAACTGTCTACCCGCCGCTCGCTAGCAATTTAGCACACGCCGGAGCGTCCGTCGACTTAACCATTTTCTCCCTTCATCTGGCAGGTGTCTCCTCAATTTTAGGCGCCATCAATTTTATTACGACTATTATTAACATGAAACCCCCTGCAATCTCTCAATACCAAACCCCCCTCTTCGTATGGGCAGTTCTTATCACGGCCGTCCTTCTTCTCCTGTCCCTCCCAGTTCTTGCTGCTGGAATCACAATACTCCTGACAGATCGAAACCTAAACACCTCCTTCTTTGACCCTGCAGGAGGAGGAGACCCAATTCTCTACCAACACCT
>gi|381282037|gb|JQ060440.1| Crenimugil crenilabis isolate 193 cytochrome oxidase subunit I (COI) gene, partial cds; mitochondrial
TTCTCATCCGAGCAGAACTAAGCCAACCTGGCGCTCTCCTAGGGGACGACCAGATCTATAATGTAATCGTAACTGCTCACGCCTTCGTGATGATTTTCTTTATAGTAATACCAATCATGATTGGAGGGTTCGGAAATTGACTTGTCCCTTTAATGATCGGCGCACCAGACATAGCATTCCCTCGAATAAACAACATGAGCTTTTGACTCCTTCCCCCATCATTCCTCCTTCTCTTAGCATCATCAGCAGTTGAAGCAGGGGCTGGAACAGGATGAACTGTCTACCCGCCGCTCGCTAGCAATTTAGCACACGCCGGAGCGTCCGTTGACTTAACCATTTTCTCCCTTCATCTGGCAGGTGTCTCCTCAATTTTAGGCGCCATCAATTTTATCACGACTATTATTAACATGAAACCCCCTGCAATCTCTCAATACCAAACCCCCCTCTTCGTATGGGCAGTTCTTATCACGGCCGTCCTTCTTCTCCTGTCCCTCCCAGTTCTTGCTGCTGGAATCACAATACTCCTGACAGATCGAAACCTAAACACCTCCTTCTTTGACCCTGCAGGAGGAGGAGACCCAATTCTCTACCAACACCT
>gi|381282039|gb|JQ060441.1| Crenimugil crenilabis isolate 194 cytochrome oxidase subunit I (COI) gene, partial cds; mitochondrial
TTCTTATCCGAGCAGAACTAAGCCAACCTGGCGCTCTCCTAGGGGACGACCAGATCTATAATGTAATCGTAACTGCTCACGCCTTCGTGATGATTTTCTTTATAGTAATACCAATCATGATTGGAGGGTTCGGAAATTGACTTGTCCCTTTAATGATCGGCGCACCAGACATAGCATTCCCTCGAATAAACAACATGAGCTTTTGACTCCTTCCCCCATCATTCCTCCTTCTCTTAGCATCATCAGCAGTTGAAGCAGGGGCTGGAACAGGATGAACTGTCTACCCGCCGCTCGCTAGCAATTTAGCACACGCCGGAGCGTCCGTTGACTTAACCATTTTCTCCCTTCATCTGGCAGGTGTCTCCTCAATTTTAGGCGCCATCAATTTTATCACGACTATTATTAACATGAAACCCCCTGCAATCTCTCAATACCAAACCCCCCTCTTCGTATGGGCAGTTCTTATCACGGCCGTCCTTCTTCTCCTGTCCCTCCCAGTTCTTGCTGCTGGAATCACAATACTCCTGACAGATCGAAACCTAAACACCTCCTTCTTTGACCCTGCAGGAGGAGGAGACCCAATTCTCTACCAACACCT
>gi|381282041|gb|JQ060442.1| Crenimugil crenilabis isolate 195 cytochrome oxidase subunit I (COI) gene, partial cds; mitochondrial
TTCTCATCCGAGCAGAACTAAGCCAACCTGGCGCTCTCCTAGGGGACGACCAGATCTATAATGTAATCGTAACTGCTCACGCCTTCGTGATGATTTTCTTTATAGTAATACCAATCATGATTGGAGGGTTCGGAAATTGACTTATCCCTTTAATGATCGGCGCACCAGACATAGCATTCCCTCGAATAAACAACATGAGCTTTTGACTCCTTCCCCCATCATTCCTCCTTCTCTTAGCATCATCAGCAGTTGAAGCAGGGGCTGGAACAGGATGAACTGTCTACCCGCCGCTCGCTAGCAATTTAGCACACGCCGGAGCGTCCGTTGACTTAACCATTTTCTCCCTTCATCTGGCAGGTGTCTCCTCAATTTTAGGCGCCATCAATTTTATCACGACTATTATTAACATGAAACCCCCTSCAATCTCTCAATACCAAACCCCCCTCTTCGTATGGGCAGTTCTTATCACGGCCGTCCTTCTTCTCCTGTCCCTCCCAGTTCTTGCTGCTGGAATCACAATACTCCTGACAGATCGAAACCTAAACACCTCCTTCTTTGACCCTGCAGGAGGGGGAGACCCAATTCTCTACCAACACCT
>gi|381282043|gb|JQ060443.1| Ellochelon vaigiensis isolate 46 cytochrome oxidase subunit I (COI) gene, partial cds; mitochondrial
TACTAATTCGAGCAGAACTAAGCCAACCTGGCGCACTCCTGGGTGATGACCAAATTTATAACGTAATTGTTACAGCTCACGCCTTCGTAATAATTTTCTTTATAGTAATACCAATCATGATCGGGGGATTCGGAAACTGACTGATTCCTCTAATAATTGGCGCGCCTGACATAGCATTCCCTCGAATAAACAACATAAGCTTCTGACTTCTTCCCCCTTCATTTCTGCTTCTCCTGGCTTCCTCTGGAGTAGAAGCAGGGGCCGGAACTGGGTGAACCGTCTACCCACCTCTCGCCAGCAATCTAGCACATGCCGGAGCATCCGTTGACCTCACCATCTTCTCCCTCCACTTAGCAGGTGTCTCCTCAATTTTAGGTGCTATTAATTTCATTACTACCATTATTAACATGAAACCTCCTGCAATTTCTCAGTACCAAACACCTCTCTTTGTCTGAGCTGTTCTCATTACAGCCGTCCTACTTCTCTTATCCCTGCCAGTACTTGCTGCTGGAATTACCATGCTTCTTACGGATCGAAACTTAAACACCTCTTTCTTCGACCCTGCGGGAGGAGGAGATCCAATTCTTTATCAACACCT
>gi|381282045|gb|JQ060444.1| Ellochelon vaigiensis isolate 51 cytochrome oxidase subunit I (COI) gene, partial cds; mitochondrial
TACTAATTCGAGCAGAATTAAGCCAACCTGGCGCACTCCTGGGTGATGACCAAATTTATAACGTAATTGTTACAGCTCACGCCTTTGTAATAATTTTCTTTATAGTAATACCAATCATAATTGGAGGGTTCGGGAATTGACTAGTTCCTCTAATGATTGGCGCGCCTGACATGGCATTCCCTCGAATAAATAACATAAGTTTCTGACTTCTTCCCCCTTCATTTTTACTTCTCCTGGCTTCCTCTGGAGTAGAAGCAGGGGCCGGAACGGGATGAACCGTCTACCCGCCCCTCGCCAGCAATCTAGCACATGCCGGAGCATCCGTTGATCTCACCATCTTCTCCCTCCACTTAGCAGGTGTCTCCTCAATTTTAGGTGCTATTAACTTCATTACTACCATTATTAACATAAAACCTCCTGCAATCTCTCAATACCAAACACCTCTCTTTGTCTGAGCTGTCCTCATTACGGCCGTCCTGCTTCTCTTATCCCTGCCAGTACTTGCTGCTGGAATTACCATGCTTCTCACAGACCGAAACTTAAATACCTCTTTCTTCGACCCTGCGGGAGGAGGGGATCCAATTCTTTATCAACACCTCTTCTGATTCTTCGGACACCCAGAAGTATACATTCTCATTCTACCTGGCTTTGGTATAATCTCACACATTGTTGCATACTATTCAGGCAAAAAAGAACCTTTTGGCTATATGGGCATGGTCTGAGCTATGATGGCCATCGGCCTTCTAGGCTTTATTGTCTGAGCTCACCACATGTTCACTGTAGGCATGGATGTAGACACTCGAGCCTATTTTACATCTGCCACAATGATTATTGCCATCCCAACAGGTGTAAAAGTCTTTAGCTGACTTGCAACTCTTCATGGAGGATCTGTAAAGTGAGAAACACCACTCCTCTGAGCCCTAGGTTTTATTTTCCTATTTACAGTAGGGGGTCTCACGGGTATCGTCTTAGCCAATTCTTCTTTAGACATCGTTCTGCATGACACATATTATGTAGTAGCACACTTCCACTACGTTCTCTCTATAGGAGCAGTCTTTGCCATTATAGGAGGCTTTGTCCACTGATTCCCACTATTCTCGGGTTATACTCTACACGAAACATGAACAAAAATCCACTTTGGAGTAATGTTTGTAGGTGTAAATCTTACTTTCTTCCCACAACATTTCTTAGGACTAGCCGGCATGCCCCGACGTTACTCTGACTACCCAGATGCATATACCCTTTGAAATACTATCTCCTCAATAGGATCACTAGTTTCCCTAGTAGCAGTAATCATATTCCTGTACATCATCTGAGAAGCATTTGTTGCTAAACGAGAAGTTCTAACAGTAGAATTGACTTCTACCAACGTTGAATGACTTCACGGGTGTCCTCCACCTTACCA
>gi|381282047|gb|JQ060445.1| Ellochelon vaigiensis isolate 53 cytochrome oxidase subunit I (COI) gene, partial cds; mitochondrial
TACTAATTCGAGCAGAATTAAGCCAACCTGGCGCACTCCTGGGTGATGACCAAATTTATAACGTAATTGTTACAGCTCACGCCTTTGTAATAATTTTCTTTATAGTAATACCAATCATAATTGGAGGGTTCGGGAATTGACTAGTTCCTCTAATGATTGGCGCGCCTGACATGGCATTCCCTCGAATAAATAACATAAGTTTCTGACTTCTTCCCCCTTCATTTTTACTTCTCCTGGCTTCCTCTGGAGTAGAAGCAGGGGCCGGAACGGGATGAACCGTCTACCCGCCCCTCGCCAGCAATCTAGCACATGCCGGAGCATCCGTTGATCTCACCATCTTCTCCCTCCACTTAGCAGGTGTCTCCTCAATTTTAGGTGCTATTAACTTCATTACTACCATTATTAACATAAAACCTCCTGCAATCTCTCAATACCAAACACCTCTCTTTGTCTGAGCTGTCCTCATTACGGCCGTCCTGCTTCTCTTATCCCTGCCAGTACTTGCTGCTGGAATTACCATGCTTCTCACAGACCGAAACTTAAATACCTCTTTCTTCGACCCTGCGGGAGGAGGGGATCCAATTCTTTATCAACACCT
>gi|381282049|gb|JQ060446.1| Joturus pichardi isolate 22 cytochrome oxidase subunit I (COI) gene, partial cds; mitochondrial
TGCTTATCCGGGCAGAACTAAGCCAACCGGGCGCCCTTTTAGGAGATGACCAAATTTATAATGTAATTGTGACAGCTCACGCCTTCGTGATAATTTTCTTCATGGTTATACCAATCATAATTGGAGGCTTTGGAAACTGACTAGTCCCCCTAATAATTGGCGCCCCTGATATAGCATTTCCTCGAATAAATAACATGAGCTTTTGACTGCTTCCTCCCTCATTTTTACTCCTCCTAGCATCTTCTGGAGTAGAAGCAGGGGCAGGGACGGGATGAACCGTTTACCCCCCATTAGCCAGCAATCTAGCCCACGCGGGAGCATCCGTTGATTTAACTATCTTCTCCCTTCATTTAGCAGGTGTTTCTTCAATTCTGGGCGCTATTAACTTTATTACAACCATTATTAATATAAAACCTCCCGCAATTTCTCAATATCAGACACCTCTTTTCGTCTGAGCTGTCCTAATTACTGCTGTTCTTCTTCTTCTGTCCTTACCAGTTCTTGCTGCTGGCATTACTATACTTCTGACAGACCGAAACCTAAATACCTCTTTCTTTGACCCTGCAGGAGGGGGAGATCCTATCTTATATCAACACTTATTCTGATTCTTTGGGCATCCAGAAGTATATATCCTTATTCTTCCTGGCTTCGGAATAATTTCGCATATCGTGGCATACTACTCAGGCAAAAAAGAACCTTTTGGCTATATAGGAATGGTTTGAGCTATAATGGCAATTGGCCTCCTAGGCTTTATTGTATGAGCACACCACATATTTACAGTTGGCATGGATGTAGATACTCGTGCTTACTTTACTTCCGCTACAATAATTATTGCTATTCCTACAGGTGTAAAAGTCTTTAGCTGACTAGCAACACTTCACGGGGGCTCAATTAAATGAGAAACCCCCCTTCTCTGAGCTCTGGGGTTCATCTTCCTCTTTACAGTTGGCGGACTCACAGGTATTATTTTAGCCAATTCCTCCCTAGACATTGTTCTACATGATACATACTACGTAGTAGCCCATTTCCACTATGTTCTCTCCATGGGCGCTGTATTCGCCATTATAGGAGGCTTTGTCCACTGATTCCCTCTGTTCTCCGGCTATACTCTCCATGAAACATGAACAAAAATTCACTTTGGTGTAATATTTGCAGGCGTAAACCTAACCTTCTTCCCACAACACTTCCTGGGATTAGCAGGCATGCCCCGACGGTACTCAGATTACCCGGATGCCTACACCCTTTGAAATTCTATATCTTCAATAGGATCATTAGTCTCCCTGGTAGCCGTCATCATGTTTTTATTCATTATTTGAGAGGCCTTCGTTGCTAAACGAGAAGTCCTAATAGTAGAAATAACCGCTACAAATGTAGAATGACTTCACGGGTGTCCTCCACCATACCA
>gi|381282051|gb|JQ060447.1| Liza abu isolate 61 cytochrome oxidase subunit I (COI) gene, partial cds; mitochondrial
TACTAATCCGAGCAGAACTAAGCCAACCTGGTGCTCTCCTAGGGGACGACCAGATTTACAATGTAATTGTTACAGCACACGCTTTCGTAATAATTTTCTTTATAGTAATGCCAATCATGATCGGAGGGTTCGGGAACTGACTAATTCCCCTAATGATCGGTGCCCCCGATATGGCCTTTCCTCGAATAAACAACATAAGCTTCTGACTTCTCCCTCCTTCCTTCCTTCTTCTCCTAGCATCCTCTGGCGTAGAAGCAGGGGCCGGTACTGGGTGAACCGTCTATCCTCCCCTCGCCAGCAACTTAGCACATGCCGGAGCATCCGTCGATTTGACAATTTTCTCCCTCCATCTCGCAGGTGTCTCCTCAATTCTGGGTGCAATTAACTTCATCACAACTATCATCAATATGAAACCTCCAGCAATCTCCCAGTACCAAACCCCTCTATTCGTATGGGCCGTCCTTATTACTGCTGTCCTTCTTCTCCTGTCTCTGCCAGTTCTTGCTGCCGGCATTACTATGCTCTTAACAGACCGGAATTTAAACACCTCTTTCTTCGATCCGGCGGGAGGAGGGGACCCCATTTTATATCAACATCT
>gi|381282053|gb|JQ060448.1| Liza affinis isolate 057x cytochrome oxidase subunit I (COI) gene, partial cds; mitochondrial
TGCTTATCCGGGCAGAACTAAGCCAGCCTGGCGCTCTCCTAGGGGACGACCAGATTTATAATGTAATCGTTACAGCACACGCTTTCGTAATAATTTTCTTTATAGTAATGCCAATTATGATTGGAGGGTTTGGAAACTGACTAATCCCCCTAATGATCGGCGCCCCCGATATGGCCTTCCCTCGAATAAATAACATAAGCTTTTGACTCCTACCTCCTTCGTTCCTTCTTCTCTTAGCGTCTTCTGGCGTAGAAGCAGGGGCCGGAACTGGATGAACCGTCTATCCTCCTCTAGCCAGCAACCTAGCACATGCCGGAGCATCAGTTGACCTTACAATTTTCTCCCTTCACCTGGCAGGTGTCTCCTCAATTTTAGGTGCTATTAACTTCATTACTACTATTATTAACATGAAACCTCCCGCAATTTCCCAGTACCAAACCCCACTCTTCGTATGGGCTGTTCTTATTACTGCCGTTCTCCTGCTTCTATCCCTGCCAGTTCTCGCTGCCGGAATTACCATGCTTTTAACAGATCGAAACTTAAACACTTCTTTCTTCGACCCAGCAGGAGGAGGGGATCCTATTCTATACCAGCACCT
>gi|381282055|gb|JQ060449.1| Planiliza alata isolate 162 cytochrome oxidase subunit I (COI) gene, partial cds; mitochondrial
TGCTCATCCGGGCAGAACTAAGCCAACCGGGCGCTCTCCTGGGGGACGACCAAATTTATAATGTAATTGTTACAGCACACGCCTTCGTAATAATTTTCTTTATAGTAATACCAATCATGATTGGAGGGTTTGGAAACTGATTAGTACCTTTAATAATTGGTGCCCCCGACATAGCATTCCCCCGTATAAACAACATAAGTTTTTGACTACTCCCCCCTTCATTTCTTCTCCTCCTGGCGTCCTCTGGCGTAGAAGCAGGGGCTGGCACTGGATGAACTGTCTATCCCCCTCTAGCCAGCAACTTAGCACATGCCGGAGCATCCGTCGACCTTACAATTTTTTCTCTCCATCTAGCAGGTGTCTCCTCAATTTTAGGAGCTATTAACTTCATCACAACTATCATCAATATGAAACCTCCTGCAATTTCCCAATATCAAACACCCCTTTTCGTTTGAGCCGTCCTTATTACTGCGGTCCTTCTCCTCCTGTCCCTACCGGTCCTTGCTGCTGGAATTACCATACTCCTTACAGATCGAAATTTAAATACCTCTTTCTTTGACCCAGCAGGGGGAGGAGACCCTATCCTATACCAACATTT
>gi|381282057|gb|JQ060450.1| Planiliza alata isolate 164 cytochrome oxidase subunit I (COI) gene, partial cds; mitochondrial
TGCTCATCCGGGCAGAACTAAGCCAACCGGGCGCTCTCCTGGGGGACGACCAAATTTATAATGTAATTGTTACAGCACACGCCTTCGTAATAATTTTCTTTATAGTAATACCAATCATGATTGGAGGGTTTGGAAACTGATTAGTACCTTTAATAATTGGTGCCCCCGACATAGCATTCCCCCGTATAAACAACATAAGTTTTTGACTACTCCCCCCTTCATTTCTTCTCCTCCTAGCGTCCTCTGGCGTAGAAGCAGGGGCTGGCACTGGATGAACTGTCTATCCCCCTCTAGCCAGCAACTTAGCACATGCCGGAGCATCCGTCGACCTTACAATTTTTTCTCTCCATCTAGCAGGTGTCTCCTCAATTTTAGGAGCTATTAACTTCATCACAACTATCATCAATATGAAACCTCCTGCAATTTCCCAATATCAAACACCCCTTTTCGTTTGAGCCGTCCTTATTACTGCGGTCCTTCTCCTCCTGTCCCTACCGGTCCTTGCTGCTGGAATTACCATACTCCTTACAGATCGAAATTTAAATACCTCTTTCTTTGACCCAGCAGGGGGAGGAGACCCTATCCTATACCAACATTTATTCTGATTCTTTGGGCACCCAGAAGTATACATTCTTATTCTTCCCGGCTTTGGTATAATCTCCCACATTGTAGCCTATTACGCAGGCAAAAAAGAACCTTTCGGCTATATAGGCATGGTTTGGGCCATGATAGCAATCGGCCTCTTAGGCTTCATTGTCTGAGCCCATCATATGTTTACAGTTGGCATAGATGTAGACACTCGTGCTTACTTTACATCCGCCACAATAATTATTGCCATCCCAACAGGCGTGAAAGTCTTTAGCTGGCTAGCAACCCTCCATGGAGGAACTCTGAAGTGAGAAACCCCTCTTCTTTGAGCCCTTGGGTTCATCTTCTTATTTACGGTAGGAGGTCTTACAGGGATTGTACTAGCCAATTCTTCCTTAGACATCGTTCTACACGACACATACTATGTCGTGGCGCACTTCCACTATGTCCTCTCCATGGGCGCAGTCTTTGCCATTATAGGAGGCTTCGTCCACTGATTCCCCCTATTCTCCGGCTATACTCTTCATGAAACATGAACAAAAATCCACTTCGGAGTGATATTTGTAGGAGTTAACTTAACCTTCTTCCCACAACATTTCCTAGGCCTAGCCGGCATGCCCCGACGGTACTCTGACTACCCAGACGCCTATACCCTTTGAAATACTGTCTCCTCTATAGGCTCCCTAATCTCCCTGGTGGCAGTAATCATGTTCCTATATATCCTCTGAGAAGCATTCGCCGCCAAACGAGAAGTTCTATCAGTAGAACTAACCTCCACAAACGTAGAATGACTACACGGATGCCCTCCCCCTTATCA
>gi|381282059|gb|JQ060451.1| Planiliza alata isolate 165 cytochrome oxidase subunit I (COI) gene, partial cds; mitochondrial
TGCTTATCCGAGCAGAACTAAGCCAGCCTGGCGCTCTCCTAGGGGACGACCAGATCTACAATGTAATTGTTACAGCACACGCTTTCGTAATAATTTTCTTTATAGTAATGCCAATCATGATTGGCGGATTTGGAAACTGACTAGTCCCCCTAATGATCGGTGCCCCCGACATAGCCTTCCCCCGAATAAACAATATAAGCTTTTGACTTCTCCCCCCTTCATTTCTTCTCCTCTTAGCATCCTCTGGTGTAGAGGCAGGAGCCGGCACTGGATGAACTGTCTACCCTCCCCTGGCTAGCAACTTAGCACATGCCGGAGCATCCGTCGACTTAACAATTTTCTCCCTCCATCTAGCAGGTGTCTCCTCAATTTTAGGTGCTATTAACTTTATTACAACTATCATCAATATGAAACCCCCTGCAATCTCCCAATACCAAACTCCCCTCTTTGTATGAGCCGTCCTAATTACTGCCGTCCTCCTTCTCCTATCCTTGCCAGTTCTTGCTGCCGGAATTACCATGCTCCTAACAGACCGAAATCTAAACACCTCTTTCTTCGACCCAGCAGGAGGAGGAGACCCCATTTTATATCAACATCT
>gi|381282061|gb|JQ060452.1| Planiliza alata isolate 165b cytochrome oxidase subunit I (COI) gene, partial cds; mitochondrial
TGCTTATCCGAGCAGAACTAAGCCAGCCTGGCGCTCTCCTAGGGGACGACCAGATCTACAATGTAATTGTTACAGCACACGCTTTCGTAATAATTTTCTTTATAGTAATGCCAATCATGATTGGCGGATTTGGAAACTGACTAGTCCCCCTAATGATCGGTGCCCCCGACATAGCCTTCCCCCGAATAAACAATATAAGCTTTTGACTTCTCCCCCCTTCATTTCTTCTCCTCTTAGCATCCTCTGGTGTAGAGGCAGGAGCCGGCACTGGATGAACTGTCTACCCTCCCCTGGCTAGCAACTTAGCACATGCCGGAGCATCCGTCGACTTAACAATTTTCTCCCTCCATCTAGCAGGTGTCTCCTCAATTTTAGGTGCTATTAACTTTATTACAACTATCATCAATATGAAACCCCCTGCAATCTCCCAATACCAAACTCCCCTCTTTGTATGAGCCGTCCTAATTACTGCCGTCCTCCTTCTCCTATCCTTGCCAGTTCTTGCTGCCGGAATTACCATGCTCCTAACAGACCGAAATCTAAACACCTCTTTCTTCGACCCAGCAGGAGGAGGAGACCCCATTTTATATCAACATCT
>gi|381282063|gb|JQ060453.1| Gracilimugil argenteus isolate 37 cytochrome oxidase subunit I (COI) gene, partial cds; mitochondrial
TACTTATCCGAGCGGAATTAAGCCAACCTGGTGCTCTACTAGGTGACGACCAAATTTATAATGTAATCGTTACAGCTCACGCTTTTGTAATAATCTTCTTTATAGTAATACCAATCATGATCGGGGGATTCGGAAATTGACTGGTCCCTTTAATAATTGGCGCACCCGACATAGCATTCCCACGAATAAACAATATAAGCTTTTGACTCCTTCCCCCCTCATTTCTTCTTCTTCTAGCATCTTCTGGGGTTGAGGCTGGGGCAGGAACAGGGTGGACCGTGTACCCGCCCTTAGCCAGTAATTTAGCACATGCCGGAGCATCCGTTGATCTAACTATCTTCTCCCTTCATCTGGCAGGTGTCTCCTCGATTCTTGGTGCCATTAACTTCATCACAACTATTATTAACATGAAACCCCCTGCAACCTCTCAATACCAAACCCCTCTTTTTGTATGAGCTGTCCTCATTACAGCCGTTCTCCTTCTCCTGTCCCTCCCAGTCCTTGCTGCCGGAATTACCATACTTCTAACAGATCGAAACTTAAATACTTCTTTCTTCGACCCTGCGGGAGGCGGAGACCCCATCTTATATCAACACCTATTCTGGTTCTTTGGCCACCCCGAAGTTTATATCCTAATTCTTCCAGGCTTTGGAATAATTTCACATATTGTTGCGTACTATGCCGGTAAAAAAGAACCCTTCGGCTACATGGGCATGGTCTGGGCCATAATGGCCATCGGCCTTCTAGGCTTCATTGTTTGGGCCCACCACATGTTTACTGTAGGAATGGACGTAGACACACGAGCATACTTCACATCCGCCACAATAATTATTGCAATCCCCACGGGCGTTAAAGTCTTCAGCTGATTAGCAACTCTTCACGGAGGCCGTCTTAAATGAGAGACCCCATTTCTGTGAGCCCTGGGCTTTATCTTTTTATTCACGGTTGGAGGCCTAACAGGGATTATTTTAGCTAACTCCTCCCTAGACATTGTCCTTCACGACACATATTATGTAGTAGCCCATTCCCACTACGTA
>gi|381282065|gb|JQ060454.1| Gracilimugil argenteus isolate 39 cytochrome oxidase subunit I (COI) gene, partial cds; mitochondrial
TACTTATCCGAGCGGAATTAAGCCAACCTGGTGCTCTACTAGGTGACGACCAAATTTATAATGTAATCGTTACAGCTCACGCTTTTGTAATAATCTTCTTTATAGTAATACCAATCATGATCGGGGGATTCGGAAATTGACTGGTCCCTTTAATAATTGGCGCACCCGACATAGCATTCCCACGAATAAACAATATAAGCTTTTGACTCCTTCCCCCCTCATTTCTTCTTCTTCTAGCATCTTCTGGGGTTGAGGCTGGGGCAGGAACAGGGTGGACCGTGTACCCGCCCTTAGCCAGTAATTTAGCACATGCCGGAGCATCCGTTGATCTAACTATCTTCTCCCTTCATCTGGCAGGTGTCTCCTCGATTCTTGGTGCCATTAACTTCATCACAACTATTATTAACATGAAACCCCCTGCAACCTCTCAATACCAAACCCCTCTTTTTGTATGAGCTGTCCTCATTACAGCCGTTCTCCTTCTCCTGTCCCTCCCAGTCCTTGCTGCCGGAATTACCATACTTCTAACAGATCGAAACTTAAATACTTCTTTCTTCGACCCTGCGGGAGGCGGAGACCCCATCTTATATCAACACCT
>gi|381282067|gb|JQ060455.1| Gracilimugil argenteus isolate 41 cytochrome oxidase subunit I (COI) gene, partial cds; mitochondrial
TACTTATCCGAGCGGAATTAAGCCAACCTGGTGCTCTACTAGGTGACGACCAAATTTATAATGTAATCGTTACAGCTCACGCTTTTGTAATAATCTTCTTTATAGTAATACCAATCATGATCGGGGGATTCGGAAATTGACTGGTCCCTTTAATAATTGGCGCACCCGACATAGCATTCCCACGAATAAACAATATAAGCTTTTGACTCCTTCCCCCCTCATTTCTTCTTCTTCTAGCATCTTCTGGGGTTGAGGCTGGGGCAGGAACAGGGTGGACCGTGTACCCGCCCTTAGCCAGTAATTTAGCACATGCCGGAGCATCCGTTGATCTAACTATCTTCTCCCTTCATCTGGCAGGTGTCTCCTCGATTCTTGGTGCCATTAACTTCATCACAACTATTATTAACATGAAACCCCCTGCAACCTCTCAATACCAAACCCCTCTTTTTGTATGAGCTGTCCTCATTACAGCCGTTCTCCTTCTCCTGTCCCTCCCAGTCCTTGCTGCCGGAATTACCATACTTCTAACAGATCGAAACTTAAATACTTCTTTCTTCGACCCTGCGGGAGGCGGAGACCCCATCTTATATCAACACCT
>gi|381282069|gb|JQ060456.1| Liza aurata isolate 168 cytochrome oxidase subunit I (COI) gene, partial cds; mitochondrial
TGCTTATCCGAGCAGAACTAAMCCAGCCTGGTGCTCTCCTAGGAGACGACCAAATTTATAATGTAATTGTTACGGCACACGCTTTCGTAATAATTTTCTTTATAGTAATGCCAATTATGATTGGAGGGTTTGGAAACTGATTAATTCCCTTAATGATCGGCGCTCCCGACATGGCCTTCCCTCGAATAAACAACATAAGCTTCTGACTTCTTCCCCCCTCATTCCTCCTTCTCTTAGCATCCTCTGGCGTAGAAGCAGGGGCAGGCACTGGGTGAACCGTATACCCTCCCCTAGCCAGCAATTTAGCACATGCTGGGGCATCCGTCGACTTAACAATCTTCTCCCTCCACCTAGCAGGTGTCTCCTCAATTTTAGGCGCTATTAACTTCATCACAACTATTATCAATATGAAACCTCCCGCGATCTCCCAATATCAGACCCCTCTATTTGTATGAGCCGTCCTTATTACCGCCGTACTTCTCCTCCTGTCTCTGCCAGTCCTTGCTGCCGGAATCACTATGCTTCTGACAGATCGAAATTTAAATACCTCTTTCTTCGACCCAGCAGGAGGGGGAGATCCCATCTTATACCAACACCT
>gi|381282071|gb|JQ060457.1| Liza aurata isolate 169 cytochrome oxidase subunit I (COI) gene, partial cds; mitochondrial
TGCTTATCCGAGCAGAACTAAGCCAGCCTGGTGCTCTCCTAGGAGACGACCAAATTTATAATGTAATTGTTACGGCACACGCTTTCGTAATAATTTTCTTTATAGTAATGCCAATTATGATTGGAGGGTTTGGAAACTGATTAATTCCCTTAATGATCGGCGCTCCCGACATGGCCTTCCCTCGAATAAACAACATAAGCTTCTGACTTCTTCCCCCCTCATTCCTCCTTCTCTTAGCATCCTCTGGCGTAGAAGCAGGGGCAGGCACTGGGTGAACCGTATACCCTCCCCTAGCCAGCAATTTAGCACATGCTGGGGCATCCGTCGACTTAACAATCTTCTCCCTCCACCTAGCAGGTGTCTCCTCAATTTTAGGCGCTATTAACTTCATCACAACTATTATCAATATGAAACCTCCCGCGATCTCCCAATATCAGACCCCTCTATTTGTATGAGCCGTCCTTATTACCGCCGTACTTCTCCTCCTGTCTCTGCCAGTCCTTGCTGCCGGAATCACTATGCTTCTGACAGATCGAAATTTAAATACCTCTTTCTTCGACCCAGCAGGAGGGGGAGATCCCATCTTATACCAACACCT
>gi|381282073|gb|JQ060458.1| Liza aurata isolate 171b cytochrome oxidase subunit I (COI) gene, partial cds; mitochondrial
TGCTTATCCGAGCAGAACTAAGCCAGCCTGGTGCTCTCCTAGGAGACGACCAAATTTATAATGTAATTGTTACGGCACACGCTTTCGTAATAATTTTCTTTATAGTAATGCCAATTATGATTGGAGGGTTTGGAAACTGATTAATTCCCTTAATGATCGGCGCTCCCGACATGGCCTTCCCTCGAATAAACAACATAAGCTTCTGACTTCTTCCCCCCTCATTCCTCCTTCTCTTAGCATCCTCTGGCGTAGAAGCAGGGGCAGGCACTGGGTGAACCGTATACCCTCCCCTAGCCAGCAATTTAGCACATGCTGGGGCATCCGTCGACTTAACAATCTTCTCCCTCCACCTAGCAGGTGTCTCCTCAATTTTAGGCGCTATTAACTTCATCACAACTATTATCAATATGAAACCTCCCGCGATCTCCCAATATCAGACCCCTCTATTTGTATGAGCCGTCCTTATTACCGCCGTACTTCTCCTCCTGTCTCTGCCAGTCCTTGCTGCCGGAATCACTATGCTTCTGACAGATCGAAATTTAAATACCTCTTTCTTCGACCCAGCAGGAGGGGGAGATCCCATCTTATACCAACACCT
>gi|381282075|gb|JQ060459.1| Liza aurata isolate 171c cytochrome oxidase subunit I (COI) gene, partial cds; mitochondrial
TGCTTATCCGAGCAGAACTAAGCCAGCCTGGTGCTCTCCTAGGAGACGACCAAATTTATAATGTAATTGTTACGGCACACGCTTTCGTAATAATTTTCTTTATAGTAATACCAATTATGATTGGAGGGTTTGGAAACTGATTAATTCCCTTAATGATCGGCGCTCCCGACATGGCCTTCCCTCGAATAAACAACATAAGCTTCTGACTTCTTCCCCCCTCATTCCTCCTTCTCTTAGCATCCTCTGGCGTAGAAGCAGGGGCAGGCACTGGGTGAACCGTATACCCTCCCCTAGCCAGCAATTTAGCACATGCTGGGGCATCCGTCGACTTAACAATCTTCTCCCTCCACCTAGCAGGTGTCTCCTCAATTTTAGGCGCTATTAACTTCATCACAACTATTATCAATATGAAACCTCCCGCGATCTCCCAATATCAGACCCCTCTATTTGTATGAGCCGTCCTTATTACCGCCGTACTTCTCCTCCTGTCTCTGCCAGTCCTTGCTGCCGGAATCACTATGCTTCTGACAGATCGAAATTTAAATACCTCTTTCTTCGACCCAGCAGGAGGGGGAGATCCCATCTTATACCAACACCT
>gi|381282077|gb|JQ060460.1| Liza aurata isolate 171d cytochrome oxidase subunit I (COI) gene, partial cds; mitochondrial
TGCTTATCCGAGCAGAACTAAGCCAGCCTGGTGCTCTCCTAGGAGACGACCAAATTTATAATGTAATTGTTACGGCACACGCTTTCGTAATAATTTTCTTTATAGTAATGCCAATTATGATCGGAGGGTTTGGAAACTGATTAATTCCCTTAATGATCGGCGCTCCCGACATGGCCTTCCCTCGAATAAACAACATAAGCTTCTGACTTCTTCCCCCCTCATTCCTCCTTCTCTTAGCATCCTCTGGCGTAGAAGCAGGGGCAGGCACTGGGTGAACCGTATACCCTCCCCTAGCCAGCAATTTAGCACATGCTGGGGCATCCGTCGACTTAACAATCTTCTCCCTCCACCTAGCAGGTGTTTCCTCAATTTTAGGCGCTATTAACTTCATCACAACTATTATCAATATGAAACCTCCCGCGATCTCCCAATATCAGACCCCTCTATTTGTATGAGCCGTCCTTATTACCGCCGTACTTCTCCTCCTGTCTCTGCCAGTCCTTGCTGCCGGAATCACTATGCTTCTGACAGATCGAAATTTAAATACCTCTTTCTTCGACCCAGCAGGAGGGGGAGATCCCATCTTATACCAACACCT
>gi|381282079|gb|JQ060461.1| Liza bandialensis isolate 54 cytochrome oxidase subunit I (COI) gene, partial cds; mitochondrial
TGCTTATCCGAGCAGAACTAAGCCAACCTGGTGCTCTCCTAGGGGACGACCAGATTTACAATGTAATTGTTACGGCACACGCTTTCGTAATAATTTTCTTTATAGTAATACCAATTATGATCGGAGGGTTTGGAAACTGACTAGTCCCCCTAATGATCGGCGCCCCCGACATGGCCTTCCCTCGAATGAACAACATAAGCTTCTGACTTCTTCCCCCCTCATTCCTTCTTCTCTTAGCATCCTCCGGCGTAGAAGCAGGAGCAGGAACCGGATGGACCGTATACCCTCCTCTCGCCAGCAATTTAGCACATGCCGGAGCATCCGTCGACCTAACAATCTTCTCCCTCCACCTAGCAGGTGTCTCCTCAATTTTAGGCGCTATTAACTTCATCACCACCATCATCAACATAAAACCTCCTGCAATTTCCCAATACCAGACCCCTCTATTTGTATGAGCCGTCCTTATTACCGCTGTTCTCCTCCTCTTATCTCTGCCAGTTCTTGCTGCCGGGATCACTATGCTCCTAACAGACCGGAATTTAAATACCTCTTTCTTTGATCCTGCAGGAGGAGGGGATCCTATCTTATACCAACACCT
>gi|381282081|gb|JQ060462.1| Liza bandialensis isolate 56 cytochrome oxidase subunit I (COI) gene, partial cds; mitochondrial
TGCTTATCCGAGCAGAACTAAGCCAACCTGGTGCTCTCCTAGGGGACGACCAGATTTACAATGTAATTGTTACGGCACACGCTTTCGTAATAATTTTCTTTATAGTAATACCAATTATGATCGGAGGGTTTGGAAACTGACTAGTCCCCCTAATGATCGGCGCCCCCGACATGGCCTTCCCTCGAATGAACAACATAAGCTTCTGACTTCTTCCCCCCTCATTCCTTCTTCTCTTAGCATCCTCCGGCGTAGAAGCAGGAGCAGGGACCGGATGGACCGTATACCCTCCTCTCGCCAGCAATTTAGCACATGCCGGAGCATCCGTCGACCTAACAATCTTCTCCCTCCACCTAGCAGGTGTCTCCTCAATTTTAGGCGCTATTAACTTCATCACCACCATCATCAACATAAAACCTCCTGCAATTTCCCAATACCAGACCCCTCTATTTGTATGAGCCGTCCTTATTACCGCTGTTCTCCTCCTCTTATCTCTGCCAGTTCTTGCTGCCGGGATCACTATGCTCCTAACAGACCGAAATTTAAATACCTCTTTCTTTGATCCTGCAGGAGGAGGGGATCCTATCTTATACCAACACCT
>gi|381282083|gb|JQ060463.1| Liza dumerili isolate 73 cytochrome oxidase subunit I (COI) gene, partial cds; mitochondrial
TGCTTATCCGTGCCGAGCTTAGCCAACCTGGTGCTCTCCTGGGGGACGACCAGATTTATAATGTAATCGTTACAGCACATGCTTTCGTAATAATCTTCTTTATAGTAATACCAATCATGATTGGAGGCTTTGGGAACTGACTAGTCCCCCTAATGATCGGCGCCCCCGACATGGCCTTCCCTCGAATGAACAACATAAGCTTTTGACTTCTTCCCCCCTCGTTCCTTCTCCTCTTAGCATCCTCCGGCGTAGAAGCAGGAGCAGGTACTGGATGAACCGTATACCCTCCACTCGCTAGCAATTTAGCCCACGCTGGAGCATCCGTTGACCTAACAATCTTCTCCCTCCACCTAGCAGGTGTCTCCTCAATTTTAGGTGCTATTAACTTTATCACTACCATCATCAACATAAAACCTCCCGCGATCTCCCAATATCAAACCCCTCTATTTGTATGAGCCGTCCTTATTACCGCTGTCCTTCTCCTACTATCTCTCCCAGTTCTTGCCGCCGGAATCACCATGCTTCTGACAGACCGAAATTTAAACACCTCTTTCTTCGACCCAGCAGGAGGAGGAGACCCTATCTTATATCAACACCT
>gi|381282085|gb|JQ060464.1| Liza dumerili isolate 76 cytochrome oxidase subunit I (COI) gene, partial cds; mitochondrial
TGCTTATCCGTGCCGAGCTTAGCCAACCTGGTGCTCTCCTGGGGGACGACCAGATTTATAATGTAATCGTTACAGCACATGCTTTCGTAATAATCTTCTTTATAGTAATACCAATCATGATTGGAGGCTTTGGGAACTGACTAGTCCCCCTAATGATCGGCGCCCCCGACATGGCCTTCCCTCGAATGAACAACATAAGCTTTTGACTTCTTCCCCCCTCGTTCCTTCTCCTCTTAGCATCCTCCGGCGTAGAAGCAGGAGCAGGTACTGGATGAACCGTATACCCTCCACTCGCTAGCAATTTAGCCCACGCTGGAGCATCCGTTGACCTAACAATCTTCTCCCTCCACCTAGCAGGTGTCTCCTCAATTTTAGGTGCTATTAACTTTATCACTACCATCATCAACATAAAACCTCCCGCGATCTCCCAATATCAAACCCCTCTATTTGTATGAGCCGTCCTTATTACCGCTGTCCTTCTCCTACTATCTCTCCCAGTTCTTGCCGCCGGAATCACCATGCTTCTGACAGACCGAAATTTAAACACCTCTTTCTTCGACCCAGCAGGAGGAGGAGACCCTATCTTATATCAACACCTATTCTGGTTCTTCGGACACCCAGAGGTATACATCCTTATCCTCCCTGGATTCGGTATGATCTCCCACATCGTTGCATACTATTCAGGCAAAAAAGAACCCTTCGGTTACATGGGCATAGTCTGGGCCATAATGGCTATCGGCCTTTTAGGCTTTATTGTCTGAGCGCATCACATATTCACAGTAGGTATGGACGTAGACACCCGTGCTTACTTTACATCCGCTACAATAATCATTGCCATCCCTACAGGCGTAAAAGTCTTTAGCTGACTAGCAACCCTTCACGGAGGGTCCGTGAAATGAGAAACGCCTCTTCTTTGAGCCCTGGGGTTCATCTTTTTATTTACGGTGGGCGGTCTTACTGGAATTGTCCTAGCTAATTCTTCTTTAGACATCGTTCTACATGACACATACTATGTGGTAGCCCACTTCCACTATGTACTCTCTATGGGGGCGGTCTTCGCCATCATAGGGGGCTTTGTTCACTGATTTCCCCTATTCTCTGGCTACACCCTCCACGAAACATGAACAAAAATCCACTTCGGAGTAATATTTGTAGGGGTCAACCTAACCTTCTTCCCCCAACACTTCCTAGGACTAGCCGGTATGCCTCGACGTTACTCTGACTACCCAGATGCCTACACCCTTTGAAATACCGTCTCCTCAATGGGCTCCCTAGTCTCCTTAGTGGCAGTAATCATGTTCTTGTATATCCTCTGAGAGGCATTCGTTGCCAAACGAGAAATTCTGTCAGTAGAACTCACTGCTACAAATGTAGAATGACTACACGGATGCCCTCCTCCTTACCA
>gi|381282087|gb|JQ060465.1| Liza dumerili isolate 77 cytochrome oxidase subunit I (COI) gene, partial cds; mitochondrial
TGCTTATCCGTGCCGAGCTTAGCCAACCTGGTGCTCTCCTGGGGGACGACCAGATTTATAATGTAATCGTTACAGCACATGCTTTCGTAATAATCTTCTTTATAGTAATACCAATCATGATTGGAGGCTTTGGGAACTGACTAGTCCCCCTAATGATCGGCGCCCCCGACATGGCCTTCCCTCGAATGAACAACATAAGCTTTTGACTTCTTCCCCCCTCGTTCCTTCTCCTCTTAGCATCCTCCGGCGTAGAAGCAGGAGCAGGTACTGGATGAACCGTATACCCTCCACTCGCTAGCAATTTAGCCCACGCTGGAGCATCCGTTGACCTAACAATCTTCTCCCTCCACCTAGCAGGTGTCTCCTCAATTTTAGGTGCTATTAACTTTATCACTACCATCATCAACATAAAACCTCCCGCGATCTCCCAATATCAAACCCCTCTATTTGTATGAGCCGTCCTTATTACCGCTGTCCTTCTCCTACTATCCCTCCCAGTTCTTGCCGCCGGAATCACCATGCTTCTGACAGACCGAAATTTAAACACCTCTTTCTTCGACCCAGCAGGAGGAGGAGACCCTATCTTATATCAACACCT
>gi|381282089|gb|JQ060466.1| Liza dumerili isolate 078b cytochrome oxidase subunit I (COI) gene, partial cds; mitochondrial
TGCTTATCCGTGCCGAGCTTAGCCAACCTGGTGCTCTCCTGGGGGACGACCAGATTTATAATGTAATCGTTACAGCACATGCTTTCGTAATAATCTTCTTTATAGTAATACCAATCATGATTGGAGGCTTTGGGAACTGACTAGTCCCCCTAATGATCGGCGCCCCCGACATGGCCTTCCCTCGAATGAACAACATAAGCTTTTGACTTCTTCCCCCCTCGTTCCTTCTCCTCTTAGCATCCTCCGGCGTAGAAGCAGGAGCAGGTACTGGATGAACCGTATACCCTCCACTCGCTAGCAATTTAGCCCACGCTGGAGCATCCGTTGACCTAACAATCTTCTCCCTCCACCTAGCAGGTGTCTCCTCAATTTTAGGTGCTATTAACTTTATCACTACCATCATCAACATAAAACCTCCCGCGATCTCCCAATATCAAACCCCTCTATTTGTATGAGCCGTCCTTATTACCGCTGTCCTTCTCCTACTATCTCTCCCAGTTCTTGCCGCCGGAATCACCATGCTTCTGACAGACCGAAATTTAAACACCTCTTTCTTCGACCCAGCAGGAGGAGGAGACCCTATCTTATATCAACACCT
>gi|381282091|gb|JQ060467.1| Liza dumerili isolate 79 cytochrome oxidase subunit I (COI) gene, partial cds; mitochondrial
TGCTTATCCGCGCCGAGCTTAGCCAACCTGGTGCTCTCTTAGGGGACGACCAGATTTATAATGTAATCGTTACAGCACATGCTTTCGTAATAATCTTCTTTATAGTAATACCAATCATGATTGGGGGCTTTGGAAACTGACTAGTCCCCCTAATAATCGGCGCCCCCGATATGGCTTTCCCCCGAATAAACAACATAAGCTTCTGACTCCTCCCTCCCTCATTCCTCCTTCTCTTGGCATCCTCCGGCGTAGAAGCAGGGGCCGGTACTGGATGAACCGTGTACCCCCCACTCGCCAGCAATTTAGCCCATGCCGGAGCATCCGTTGACCTAACAATCTTCTCCCTCCACCTGGCAGGTGTCTCCTCAATTTTAGGTGCTATTAACTTTATCACTACCATCATCAACATAAAACCTCCCGCGATCTCTCAATATCAGACCCCTCTGTTTGTATGAGCCGTCCTTATTACCGCCGTCCTTCTCCTACTATCTCTGCCAGTTCTTGCTGCCGGAATCACCATGCTCCTGACAGACCGAAATTTAAATACCTCTTTCTTCGACCCAGCAGGGGGAGGAGACCCTATTTTATACCAACACCT
>gi|381282093|gb|JQ060468.1| Liza dumerili isolate 80 cytochrome oxidase subunit I (COI) gene, partial cds; mitochondrial
TGCTTATCCGCGCCGAGCTTAGCCAACCTGGTGCTCTCTTAGGGGACGACCAGATTTATAATGTAATCGTTACAGCACATGCTTTCGTAATAATCTTCTTTATAGTAATACCAATCATGATTGGGGGCTTTGGAAACTGACTAGTCCCCCTAATAATCGGCGCCCCCGATATGGCTTTCCCCCGAATAAACAACATAAGCTTCTGACTCCTCCCTCCCTCATTCCTCCTTCTCTTGGCATCCTCCGGCGTAGAAGCAGGGGCCGGTACTGGATGAACCGTGTACCCCCCACTCGCCAGCAATTTAGCCCATGCCGGAGCATCCGTTGACCTAACAATCTTCTCCCTCCACCTGGCAGGTGTCTCCTCAATTTTAGGTGCTATTAACTTTATCACTACCATCATCAACATAAAACCTCCCGCGATCTCTCAATATCAGACCCCTCTGTTTGTATGAGCCGTCCTTATTACCGCCGTCCTTCTCCTACTATCTCTGCCAGTTCTTGCTGCCGGAATCACCATGCTCCTGACAGACCGAAATTTAAATACCTCTTTCTTCGACCCAGCAGGGGGAGGAGACCCTATTTTATACCAACACCT
>gi|381282095|gb|JQ060469.1| Neochelon falcipinnis isolate 83 cytochrome oxidase subunit I (COI) gene, partial cds; mitochondrial
TACTTATCCGAGCAGAACTAAGTCAACCTGGCGCTCTCCTAGGGGACGACCAGATCTACAACGTCATCGTTACAGCTCATGCTTTCGTAATAATTTTCTTTATAGTAATACCAATTATGATCGGAGGGTTCGGAAACTGACTCGTCCCCTTAATGATTGGTGCGCCTGACATGGCATTCCCTCGAATGAATAACATAAGCTTCTGACTTCTCCCTCCCTCATTCCTTCTTCTACTGGCCTCTTCCGGAGTTGAAGCAGGGGCAGGAACAGGCTGAACTGTCTACCCTCCTCTAGCCGGCAATCTAGCACACGCTGGAGCATCCGTTGATTTAACTATTTTCTCCCTCCATTTAGCAGGTGTTTCCTCAATTTTAGGTGCCATCAACTTTATCACAACTATCATCAACATGAAACCTCCTGGAATCTCCCAATATCAGACACCCCTCTTCGTATGAGCTGTCTTAATTACAGCTGTGCTTCTCCTACTTTCCCTACCTGTCCTAGCTGCTGGCATTACTATGCTTCTCACAGATCGAAACCTAAACACCTCTTTCTTTGATCCTGCCGGGGGAGGGGACCCCATTCTGTACCAACATCT
>gi|381282097|gb|JQ060470.1| Neochelon falcipinnis isolate 84 cytochrome oxidase subunit I (COI) gene, partial cds; mitochondrial
TACTTATCCGAGCAGAACTAAGTCAACCTGGCGCTCTCCTAGGGGACGACCAGATCTACAACGTCATCGTTACAGCTCATGCTTTCGTAATAATTTTCTTTATAGTAATACCAATTATGATCGGAGGGTTCGGAAACTGACTCGTCCCCTTAATGATTGGTGCGCCTGACATGGCATTCCCTCGAATGAATAACATAAGCTTCTGACTTCTCCCTCCCTCATTCCTTCTTCTACTGGCCTCTTCCGGAGTTGAAGCAGGGGCAGGAACAGGCTGAACTGTCTACCCCCCTCTAGCCGGCAATCTAGCACACGCTGGAGCATCCGTTGATTTAACTATTTTCTCCCTCCATTTAGCAGGTGTTTCCTCAATTTTAGGTGCCATCAACTTTATCACAACTATCATCAACATGAAACCTCCTGGAATCTCCCAATATCAGACACCCCTCTTCGTATGAGCTGTCTTAATTACAGCTGTGCTTCTCCTACTTTCCCTACCTGTCCTAGCTGCTGGCATTACTATGCTTCTCACAGATCGAAACCTAAACACCTCTTTCTTTGATCCTGCCGGGGGAGGGGACCCCATTCTGTACCAACATCT
>gi|381282099|gb|JQ060471.1| Neochelon falcipinnis isolate 85 cytochrome oxidase subunit I (COI) gene, partial cds; mitochondrial
TACTTATCCGAGCAGAACTAAGTCAACCTGGCGCTCTCCTAGGGGACGACCAGATCTACAACGTCATCGTTACAGCTCATGCTTTCGTAATAATTTTCTTTATAGTAATACCAATTATGATCGGAGGGTTCGGAAACTGACTCGTCCCCTTAATGATTGGTGCGCCTGACATGGCATTCCCTCGAATGAATAACATAAGCTTCTGACTTCTCCCTCCCTCATTCCTTCTTCTACTGGCCTCTTCCGGAGTTGAAGCAGGGGCAGGAACAGGCTGAACTGTCTACCCCCCTCTAGCCGGCAATCTAGCACACGCTGGAGCATCCGTTGATTTAACTATTTTCTCCCTCCATTTAGCAGGTGTTTCCTCAATTTTAGGTGCCATCAACTTTATCACAACTATCATCAACATGAAACCTCCTGGAATCTCCCAATATCAGACACCCCTCTTCGTATGAGCTGTCTTAATTACAGCTGTGCTTCTCCTACTTTCCCTACCTGTCCTAGCTGCTGGCATTACTATGCTTCTCACAGATCGAAACCTAAACACCTCTTTCTTTGATCCTGCCGGGGGAGGGGACCCCATTCTGTACCAACATCTATTCTGATTCTTCGGACACCCAGAAGTATACATTCTTATTCTTCCCGGTTTCGGAATAATTTCTCACATCGTCGCATATTACTCAGGCAAAAAAGAACCTTTCGGCTACATGGGTATGGTCTGAGCTATGATGGCCATCGGCCTCTTAGGCTTCATTGTCTGAGC
>gi|381282101|gb|JQ060472.1| Neochelon falcipinnis isolate 86 cytochrome oxidase subunit I (COI) gene, partial cds; mitochondrial
TACTTATCCGAGCAGAACTAAGTCAACCTGGCGCTCTCCTAGGGGACGACCAGATCTACAACGTCATCGTTACAGCTCATGCTTTCGTAATAATTTTCTTTATAGTAATACCAATTATGATCGGAGGGTTCGGAAACTGACTCGTCCCCTTAATGATTGGTGCGCCTGACATGGCATTCCCTCGAATGAATAACATAAGCTTCTGACTTCTCCCTCCCTCATTCCTTCTTCTACTGGCCTCTTCCGGAGTTGAAGCAGGGGCAGGAACAGGCTGAACTGTCTACCCCCCTCTAGCCGGCAATCTAGCACACGCTGGAGCATCCGTTGATTTAACTATTTTCTCCCTCCATTTAGCAGGTGTTTCCTCAATTTTAGGTGCCATCAACTTTATCACAACTATCATCAACATGAAACCTCCTGGAATCTCCCAATATCAGACACCCCTCTTCGTATGAGCTGTCTTAATTACAGCTGTGCTTCTCCTACTTTCCCTACCTGTCCTAGCTGCTGGCATTACTATGCTTCTCACAGATCGAAACCTAAACACCTCTTTCTTTGATCCTGCCGGGGGAGGGGACCCCATTCTGTACCAACATCT
>gi|381282103|gb|JQ060473.1| Parachelon grandisquamis isolate 88 cytochrome oxidase subunit I (COI) gene, partial cds; mitochondrial
TACTTATTCGAGCAGAACTAAGCCAACCTGGCGCTCTCCTAGGAGATGATCAAATTTATAATGTCATCGTTACGGCACACGCTTTTGTAATAATTTTCTTTATAGTAATACCAATCATAATCGGAGGGTTTGGAAACTGATTAGTCCCATTAATAATCGGCGCCCCCGACATGGCCTTCCCCCGAATAAATAACATAAGCTTCTGGCTTCTTCCCCCTTCATTCCTCCTTCTCCTAGCATCCTCCGGTGTAGAAGCCGGAGCGGGCACTGGATGAACGGTTTATCCTCCCTTAGCTAGCAATCTGGCACATGCTGGGGCGTCCGTTGACTTAACAATCTTTTCCCTCCACCTAGCAGGTGTCTCCTCTATTCTAGGTGCTATCAACTTCATCACAACTATTATTAACATGAAACCTCCTGCAATTTCCCAATATCAAACACCCCTATTTGTCTGAGCCGTTCTTATTACTGCCGTCCTTCTTCTCCTATCCCTACCAGTTCTTGCTGCCGGAATTACTATACTCCTGACAGACCGAAATTTAAACACCTCTTTCTTTGACCCAGCAGGAGGAGGAGATCCTATCCTTTACCAACATCT
>gi|381282105|gb|JQ060474.1| Parachelon grandisquamis isolate 089b cytochrome oxidase subunit I (COI) gene, partial cds; mitochondrial
TACTTATTCGAGCAGAACTAAGCCAACCTGGCGCTCTCCTAGGAGATGATCAAATTTATAATGTCATCGTTACGGCACACGCTTTTGTAATAATTTTCTTTATAGTAATACCAATCATAATCGGAGGGTTTGGAAACTGATTAGTCCCATTAATAATCGGCGCCCCCGACATGGCCTTCCCCCGAATAAATAACATAAGCTTCTGGCTTCTTCCCCCTTCATTCCTCCTTCTCCTAGCATCCTCCGGTGTAGAAGCCGGAGCGGGCACTGGATGAACGGTTTATCCTCCCTTAGCTAGCAATCTGGCACATGCTGGGGCGTCCGTTGACTTAACAATCTTTTCCCTCCACCTAGCAGGTGTCTCCTCTATTCTAGGTGCTATCAACTTCATCACAACTATTATTAACATGAAACCTCCTGCAATTTCCCAATATCAAACACCCCTATTTGTCTGAGCCGTTCTTATTACTGCCGTCCTTCTTCTCCTATCCCTACCAGTTCTTGCTGCCGGAATTACTATACTCCTGACAGACCGAAATTTAAACACCTCTTTCTTTGACCCAGCAGGAGGAGGAGATCCTATCCTTTACCAACATCT
>gi|381282107|gb|JQ060475.1| Parachelon grandisquamis isolate 90 cytochrome oxidase subunit I (COI) gene, partial cds; mitochondrial
TACTTATTCGAGCAGAACTAAGCCAACCTGGCGCTCTCCTAGGAGATGATCAAATTTATAATGTCATCGTTACGGCACACGCTTTTGTAATAATTTTCTTTATAGTAATACCAATCATAATCGGAGGGTTTGGAAACTGATTAGTCCCATTAATAATCGGCGCCCCCGACATGGCCTTCCCCCGAATAAATAACATAAGCTTCTGGCTTCTTCCCCCTTCATTCCTCCTTCTCCTAGCATCCTCCGGTGTAGAAGCCGGAGCGGGCACTGGATGAACGGTTTATCCTCCCTTAGCTAGCAATCTGGCACATGCTGGGGCGTCCGTTGACTTAACAATCTTTTCCCTCCACCTAGCAGGTGTCTCCTCTATTCTAGGTGCTATCAACTTCATCACAACTATTATTAACATGAAACCTCCTGCAATTTCCCAATATCAAACACCCCTATTTGTCTGAGCCGTTCTTATTACTGCCGTCCTTCTTCTCCTATCCCTACCAGTTCTTGCTGCCGGAATTACTATACTCCTGACAGACCGAAATTTAAACACCTCTTTCTTTGACCCAGCAGGAGGAGGAGATCCTATCCTTTACCAACATCT
>gi|381282109|gb|JQ060476.1| Parachelon grandisquamis isolate 91 cytochrome oxidase subunit I (COI) gene, partial cds; mitochondrial
TACTTATTCGAGCAGAACTAAGCCAACCTGGCGCTCTCCTAGGAGATGATCAAATTTATAATGTCATCGTTACGGCACACGCTTTTGTAATAATTTTCTTTATAGTAATACCAATCATAATCGGAGGGTTTGGAAACTGATTAGTCCCATTAATAATCGGCGCCCCCGACATGGCCTTCCCCCGAATAAATAACATAAGCTTCTGGCTTCTTCCCCCTTCATTCCTCCTTCTCCTAGCATCCTCCGGTGTAGAAGCCGGAGCGGGCACTGGATGAACGGTTTATCCTCCCTTAGCTAGCAATCTGGCACATGCTGGGGCGTCCGTTGACTTAACAATCTTTTCCCTCCACCTAGCAGGTGTCTCCTCTATTCTAGGTGCTATCAACTTCATCACAACTATTATTAACATGAAACCTCCTGCAATTTCCCAATATCAAACACCCCTATTTGTCTGAGCCGTTCTTATTACTGCCGTCCTTCTTCTCCTTTCCCTACCAGTTCTTGCTGCCGGAATTACTATACTCCTGACAGACCGAAATTTAAACACCTCTTTCTTTGACCCAGCAGGAGGAGGAGATCCTATCCTTTACCAACATCTATTTTGATTCTTTGGGCACCCAGAAGTATACATTCTTATTCTTCCCGGATTTGGCATGATTTCCCATATCGTTGCGTACTACTCAGGCAAAAAAGAACCTTTCGGTTACATAGGCATGGTATGAGCCATAATGGCTATCGGCCTCCTAGGCTTCATTGTCTGAGCCCACCACATATTCACAGTCGGAATAGACGTAGACACTCGTGCTTACTTTACATCCGCCACAATAATTATCGCCATCCCAACTGGTGTAAAAGTCTTCAGCTGATTAGCAACCCTTCATGGCGGATCTGTAAAATGAGAAACCCCCCTCCTCTGAGCCCTAGGATTTATTTTCTTATTCACAGTAGGAGGATTAACAGGAATTGTCCTAGCCAATTCTTCTTTAGACATTGTACTGCATGACACATATTACGTAGTTGCCCACTTCCACTATGTCCTCTCTATAGGTGCAGTCTTCGCCATTATAGGAGGCTTCGTCCACTGATTCCCCCTATTCTCCGGATATACCCTTCACGAGACATGAACAAAAATTCACTTTGGAGTAATATTCGTAGGAGTCAATTTAACCTTCTTCCCCCAACACTTCCTAGGATTAGCTGGCATGCCCCGACGTTATTCTGACTACCCGGATGCCTACACTCTTTGAAACACCGTATCCTCAATAGGCTCTCTAATCTCCCTGGTAGCAGTAATTATATTCCTATATATTATCTGAGAAGCATTCGTCGCTAAACGAGAAGTCCTATCAGTCGAACTTACTGCTACAAACGTTGAATGACTACATGGATGCCCTCCTCCCTATCA
>gi|381282111|gb|JQ060477.1| Liza haematocheila isolate 95 cytochrome oxidase subunit I (COI) gene, partial cds; mitochondrial
TGCTTATCCGAGCAGAACTAAGCCAGCCTGGCGCTCTCCTAGGGGACGACCAGATCTATAATGTAATCGTTACAGCACACGCCTTCGTAATAATTTTCTTTATAGTAATGCCAATCATGATTGGAGGGTTCGGAAACTGACTAATCCCCTTAATGATCGGCGCCCCCGACATGGCCTTCCCTCGAATAAATAACATAAGCTTCTGACTCCTCCCTCCCTCATTTCTTCTCCTTTTAGCATCCTCTGGCGTARAAGCAGGGGCCGGGACCGGATGAACCGTCTACCCTCCCTTAGCCAGCAACCTAGCACATGCCGGAGCATCAGTTGACTTAACAATTTTCTCCCTTCACCTGGCAGGTGTTTCCTCAATTCTAGGAGCCATTAACTTTATTACTACTATTATTAACATGAAACCCCCCGCAATTTCCCAATACCAAACTCCGCTCTTCGTATGAGCCGTTCTAATTACTGCCGTCCTCCTTCTCCTATCCCTGCCAGTCCTTGCTGCCGGAATTACCATACTCTTAACAGATCGAAACTTAAACACTTCTTTCTTCGACCCAGCAGGAGGGGGGGATCCCATTCTATACCAGCACCT
>gi|381282113|gb|JQ060478.1| Liza haematocheila isolate 102 cytochrome oxidase subunit I (COI) gene, partial cds; mitochondrial
TGCTTATCCGAGCAGAACTAAGCCAGCCTGGCGCTCTCCTAGGGGACGACCAGATCTATAATGTAATCGTTACAGCACACGCCTTCGTAATAATTTTCTTTATAGTAATGCCAATCATGATTGGAGGGTTCGGAAACTGACTAATCCCCTTAATGATCGGCGCCCCCGACATGGCCTTCCCTCGAATAAATAACATAAGCTTCTGACTCCTCCCTCCCTCATTTCTTCTCCTTTTAGCATCCTCTGGCGTAGAAGCAGGGGCCGGGACCGGATGAACCGTCTACCCTCCCTTAGCCAGCAACCTAGCACATGCCGGAGCATCAGTTGACTTAACAATTTTCTCCCTTCACCTGGCAGGTGTTTCCTCAATTCTAGGAGCCATTAACTTTATTACTACTATTATTAACATGAAACCCCCCGCAATTTCCCAATACCAAACTCCGCTCTTCGTATGAGCCGTTCTAATTACTGCCGTCCTCCTTCTCCTATCCCTGCCAGTCCTTGCTGCCGGAATTACCATACTCTTAACAGATCGAAACTTAAACACTTCTTTCTTCGACCCAGCAGGAGGGGGGGATCCCATTCTATACCAGCACCT
>gi|381282115|gb|JQ060479.1| Liza ramado isolate 173 cytochrome oxidase subunit I (COI) gene, partial cds; mitochondrial
TGCTTATCCGAGCAGAATTAAGCCAACCTGGCGCTCTCCTGGGAGACGACCAGATTTACAATGTAATTGTTACGGCACACGCTTTCGTAATAATTTTCTTTATAGTAATACCAATTATGATTGGAGGGTTTGGAAACTGACTAGTCCCCTTAATGATCGGCGCCCCCGACATGGCCTTTCCTCGAATAAACAACATAAGCTTCTGACTTCTCCCCCCTTCATTCCTCCTCCTTCTAGCATCCTCTGGCGTAGAAGCAGGGGCAGGCACTGGATGGACCGTGTACCCTCCCCTGGCCAGCAATTTAGCACATGCCGGGGCATCCGTCGACCTGACAATCTTTTCCCTTCACCTAGCAGGTGTCTCTTCAATTTTAGGTGCTATTAACTTCATCACAACCATTATCAATATGAAACCTCCCGCGATCTCCCAATATCAAACCCCCCTATTTGTGTGAGCCGTCCTTATCACCGCCGTCCTTCTCCTTTTATCCCTCCCAGTCCTTGCTGCCGGGATCACTATGCTCCTTACAGATCGAAACTTAAACACCTCTTTCTTCGATCCGGCGGGAGGAGGAGACCCCATCCTATATCAACATCT
>gi|381282117|gb|JQ060480.1| Liza ramado isolate 174b cytochrome oxidase subunit I (COI) gene, partial cds; mitochondrial
TGCTTATCCGAGCAGAACTAAGCCAACCTGGCGCTCTCCTGGGAGACGACCAGATTTACAATGTAATTGTTACGGCACACGCTTTCGTAATAATTTTCTTTATAGTAATACCAATTATGATTGGAGGGTTTGGAAACTGACTAGTCCCCTTAATGATCGGCGCCCCCGACATGGCCTTTCCTCGAATAAACAACATAAGCTTCTGACTTCTCCCCCCTTCATTCCTCCTCCTTCTAGCATCCTCTGGCGTAGAAGCAGGGGCAGGCACTGGATGGACCGTGTACCCTCCCCTGGCCAGCAATTTAGCACATGCCGGGGCATCCGTCGACCTGACAATCTTTTCCCTTCACCTAGCAGGTGTCTCTTCAATTTTAGGTGCTATTAACTTCATCACAACCATTATCAATATGAAACCTCCTGCGATCTCCCAATATCAAACCCCCCTATTTGTGTGAGCCGTCCTTATCACCGCCGTCCTTCTCCTTTTATCCCTCCCAGTCCTTGCTGCCGGGATCACTATGCTCCTTACAGATCGAAACTTAAACACCTCTTTCTTCGATCCGGCGGGAGGAGGAGACCCCATCCTATATCAACATCT
>gi|381282119|gb|JQ060481.1| Liza richardsonii isolate 157 cytochrome oxidase subunit I (COI) gene, partial cds; mitochondrial
TGCTTATCCGAGCAGAACTAAGCCAACCTGGCGCTCTCCTAGGAGACGACCAGATTTACAATGTAATTGTTACAGCACACGCTTTCGTAATAATTTTCTTTATAGTAATGCCAATTATGATTGGAGGATTTGGAAACTGACTAGTCCCCTTAATGATCGGCGCCCCCGACATGGCATTCCCTCGAATGAACAACATAAGCTTTTGACTTCTTCCCCCCTCATTCCTTCTTCTCTTGGCATCCTCTGGCGTAGAAGCGGGAGCAGGTACTGGGTGGACCGTATACCCTCCCCTCGCCAGCAATTTAGCACATGCTGGGGCATCCGTCGACCTAACAATCTTCTCCCTCCACCTAGCAGGTGTCTCCTCAATTTTGGGTGCTATTAACTTCATCACAACTATTATCAACATAAAACCTCCCGCAATTTCCCAATACCAAACCCCCCTATTTGTGTGAGCCGTCCTTATTACCGCCGTTCTTCTCCTTTTATCTCTGCCAGTTCTTGCTGCCGGGATCACTATACTCCTAACAGACCGGAATTTAAACACCTCTTTCTTTGACCCAGCAGGAGGAGGAGACCCTATCTTATACCAACACCT
>gi|381282121|gb|JQ060482.1| Liza richardsonii isolate 158 cytochrome oxidase subunit I (COI) gene, partial cds; mitochondrial
TGCTTATCCGAGCAGAACTAAGCCAACCTGGCGCTCTCCTAGGAGACGACCAGATTTACAATGTAATTGTTACAGCACACGCTTTCGTAATAATTTTCTTTATAGTAATGCCAATTATGATTGGAGGATTTGGAAACTGACTAGTCCCCTTAATGATCGGCGCCCCCGACATGGCATTCCCTCGAATGAACAACATAAGCTTTTGACTTCTTCCCCCCTCATTCCTTCTTCTCTTGGCATCCTCTGGCGTAGAAGCGGGAGCAGGTACTGGGTGGACCGTATACCCTCCCCTCGCCAGCAATTTAGCACATGCTGGGGCATCCGTCGACCTAACAATCTTCTCCCTCCACCTAGCAGGTGTCTCCTCAATTTTGGGTGCTATTAACTTCATCACAACTATTATCAACATAAAACCTCCCGCAATTTCCCAATACCAAACCCCCCTATTTGTGTGAGCCGTCCTTATTACCGCCGTTCTTCTCCTTTTATCTCTGCCAGTTCTTGCTGCCGGGATCACTATACTCCTAACAGACCGGAATTTAAACACCTCTTTCTTTGACCCAGCAGGAGGAGGAGACCCTATCTTATACCAACACCT
>gi|381282123|gb|JQ060483.1| Chelon saliens isolate 166 cytochrome oxidase subunit I (COI) gene, partial cds; mitochondrial
TACTTATCCGAGCAGAACTAAGCCAACCTGGTGCTCTCTTAGGAGACGACCAGATTTACAATGTTATTGTTACGGCACATGCTTTCGTAATAATTTTCTTTATAGTAATACCAATTATGATTGGAGGGTTCGGAAACTGACTAGTCCCCTTAATGATCGGCGCCCCCGACATGGCCTTCCCTCGAATGAACAACATAAGCTTTTGACTTCTTCCCCCCTCATTCCTTCTTCTCTTAGCATCCTCTGGCGTARAAGCAGGAGCAGGTACTGGATGAACCGTTTACCCTCCCCTCGCCAGCAATTTAGCACATGCTGGGGCATCCGTCGACTTAACAATCTTCTCCCTCCACCTAGCAGGTGTCTCCTCAATTTTAGGTGCTATTAACTTCATCACAACTATTATTAACATAAAACCCCCCGCAATTTCCCAGTATCAGACCCCTCTATTTGTGTGAGCCGTCCTTATTACCGCCGTCCTTCTCCTCTTATCTCTGCCAGTTCTTGCTGCCGGAATCACGATGCTCCTGACAGACCGGAATTTAAACACCTCTTTCTTCGACCCAGCAGGAGGAGGGGATCCGATCCTATACCAACACCT
>gi|381282125|gb|JQ060484.1| Chelon labrosus isolate 178 cytochrome oxidase subunit I (COI) gene, partial cds; mitochondrial
TGCTTATCCGAGCAGAACTAAGCCAACCCGGTGCTCTCCTAGGAGACGACCAAATTTATAATGTAATTGTTACGGCACACGCTTTCGTAATAATTTTCTTTATAGTAATACCAATTATGATTGGAGGGTTTGGAAACTGACTAGTCCCCTTAATGATCGGTGCCCCCGACATAGCCTTCCCTCGAATAAACAACATAAGCTTTTGACTCCTTCCCCCTTCATTTCTTCTTCTCTTAGCATCCTCTGGCGTAGAAGCAGGAGCAGGTACTGGATGAACCGTATACCCTCCCCTAGCCAGCAATTTAGCGCATGCCGGGGCATCCGTCGACCTAACAATCTTCTCCCTCCACCTAGCAGGTGTCTCCTCAATTTTAGGTGCTATTAACTTCATCACAACTATTATCAACATGAAACCTCCCGCGATCTCCCAATATCAGACCCCTCTGTTCGTGTGAGCCGTCCTTATCACCGCCGTCCTTCTCCTCTTATCTCTGCCAGTTCTTGCTGCCGGAATCACCATGCTCCTAACAGATCGGAACTTAAATACCTCTTTCTTCGACCCAGCGGGAGGAGGAGATCCCATCTTGTACCAACACCTATTCTGATTCTTCGGGCACCCAGAAGTATACATCCTCATCCTCCCTGGATTTGGCATGATTTCCCACATCGTCGCATACTACTCAGGCAAAAAAGAACCTTTCGGTTATATAGGCATGGTTTGAGCCATGATGGCCATCGGCCTCTTAGGCTTTATTGTCTGAGCCCATCACATGTTCACAGTGGGCATGGATGTAGACACCCGAGCCTACTTTACATCCGCCACAATGATTATTGCCATCCCAACAGGCGTAAAAGTCTTTAGCTGACTAGCAACCCTTCACGGAGGGTCCGTGAAATGAGAAACGCCCCTCCTTTGAGCCCTAGGGTTCATCTTTTTATTTACAGTCGGGGGTCTCACAGGAATCGTACTAGCTAATTCTTCTTTAGACATCGTACTACATGATACATACTATGTAGTAGCCCATTTCCACTACGTTCTCTCTATGGGCGCAGTCTTTGCAATTATAGGAGGCTTTGTTCACTGATTCCCCCTATTCTCAGGCTATACCCTCCACGAAACATGAACAAAAATCCACTTCGGAGTAATATTTGTAGGGGTCAACCTAACCTTCTTCCCACAACACTTCCTAGGGCTAGCCGGCATGCCTCGACGTTACTCTGATTACCCAGATGCCTACACCCTTTGAAATACTGTCTCCTCAATAGGCTCCCTAGTCTCCCTGGTAGCAGTAATTATGTTCCTATATATTCTCTGAGAAGCATTCGTTGCCAAACGAGAAGTTTTAACAGTAGAACTCACCGCCACAAACGTAGAATGACTACACGGATGTCCTCCTCCTTATCA
>gi|381282127|gb|JQ060485.1| Liza sp. JDD-2011d isolate 62 cytochrome oxidase subunit I (COI) gene, partial cds; mitochondrial
TACTTATCCGAGCAGAACTAAGTCAACCTGGCGCTCTCCTGGGGGACGACCAGATCTATAATGTCATTGTTACAGCCCACGCTTTCGTAATAATTTTCTTTATAGTAATGCCAATCATGATCGGGGGATTTGGAAATTGACTAGTCCCTCTAATGATCGGCGCCCCTGATATAGCCTTCCCTCGTATAAATAATATAAGCTTTTGACTTCTTCCTCCCTCATTCCTTCTCCTCTTAGCATCCTCTGGTGTAGAAGCGGGAGCTGGGACTGGCTGAACTGTCTATCCCCCTCTAGCCGGCAACTTGGCACATGCTGGAGCATCCGTTGACCTCACAATTTTCTCCCTCCATCTAGCAGGTGTCTCCTCAATTCTTGGTGCTATCAATTTTATTACAACTATCATCAACATGAAACCTCCCGCAATTTCCCAATACCAGACCCCACTCTTCGTATGGGCCGTTCTTATTACTGCCGTCCTCCTTCTCCTGTCCCTACCAGTTCTTGCTGCTGGGATTACTATGCTCCTAACAGACCGAAACTTAAACACCTCTTTCTTCGACCCGGCAGGAGGGGGAGATCCTATTTTATATCAACACTT
>gi|381282129|gb|JQ060486.1| Liza sp. J JDD-2015 isolate 063 cytochrome oxidase subunit I (COI) gene, partial cds; mitochondrial
TACTTATCCGAGCAGAACTAAGTCAACCTGGCGCTCTCCTGGGGGATGACCAGATCTATAATGTCATTGTTACAGCTCACGCTTTCGTAATAATTTTCTTTATAGTAATGCCAATCATGATTGGGGGATTTGGAAACTGACTAGTCCCTCTAATGATCGGCGCCCCTGATATGGCCTTCCCTCGAATGAATAATATAAGCTTTTGACTCCTTCCCCCCTCATTCCTTCTCCTCTTAGCATCCTCTGGCGTAGAAGCGGGGGCTGGGACTGGCTGAACTGTTTATCCCCCTCTGGCCAGCAACTTGGCACATGCTGGAGCATCCGTTGACCTAACAATTTTCTCCCTCCATCTAGCAGGTGTCTCCTCAATTCTAGGTGCTATTAATTTTATTACAACCATCATCAACATGAAACCTCCCGCAATTTCCCAATACCAGACCCCACTCTTCGTATGGGCCGTTCTTATTACTGCCGTCCTTCTTCTCCTGTCCCTACCAGTTCTCGCTGCTGGAATTACTATGCTCCTAACAGACCGAAACTTAAACACCTCCTTCTTCGACCCGGCAGGAGGGGGAGATCCTATTTTATATCAACACTT
>gi|381282131|gb|JQ060487.1| Liza sp. JDD-2011c isolate 103 cytochrome oxidase subunit I (COI) gene, partial cds; mitochondrial
TACTTATCCGAGCAGAACTAAGTCAACCTGGCGCCCTCCTGGGAGACGACCAGATCTATAATGTCGTTGTTACAGCTCACGCTTTCGTAATAATTTTCTTTATAGTAATGCCAATCATGATTGGGGGGTTTGGAAATTGACTAATCCCTCTAATGATCGGCGCCCCCGATATGGCCTTCCCTCGAATGAATAATATGAGCTTTTGACTCCTTCCTCCCTCATTCCTTCTCCTCTTAGCATCCTCTGGTGTCGAAGCAGGAGCCGGAACTGGCTGAACTGTTTATCCTCCCCTAGCCAGCAACTTGGCACATGCCGGGGCATCCGTTGACCTAACAATTTTCTCCCTCCATCTAGCAGGTGTCTCCTCAATTCTAGGTGCTATTAATTTTATCACAACTATCATCAACATGAAACCTCCCGCAATTTCCCAATACCAAACCCCACTCTTCGTGTGGGCTGTTCTTATTACTGCCGTCCTCCTTCTCCTGTCCCTACCAGTTCTCGCTGCTGGAATTACTATGCTCCTAACAGACCGAAACTTAAACACCTCTTTCTTCGACCCGGCAGGAGGGGGAGACCCTATCTTATATCAGCACTT
>gi|381282133|gb|JQ060488.1| Liza sp. JDD-2011c isolate 107 cytochrome oxidase subunit I (COI) gene, partial cds; mitochondrial
TACTTATCCGAGCAGAACTAAGTCAACCTGGCGCCCTCCTGGGAGACGACCAGATCTATAATGTCGTTGTTACAGCTCACGCTTTCGTAATAATTTTCTTTATAGTAATGCCAATCATGATTGGGGGGTTTGGAAATTGACTAATCCCTCTAATGATCGGCGCCCCCGATATGGCCTTCCCTCGAATGAATAATATGAGCTTTTGACTCCTTCCTCCCTCATTCCTTCTCCTCTTAGCATCCTCTGGTGTCGAAGCAGGAGCCGGAACTGGCTGAACTGTTTATCCTCCCCTAGCCAGCAACTTGGCACATGCCGGGGCATCCGTTGACCTAACAATTTTCTCCCTCCATCTAGCAGGTGTCTCCTCAATTCTAGGTGCTATTAATTTTATCACAACTATCATCAACATGAAACCTCCCGCAATTTCCCAATACCAAACCCCACTCTTCGTGTGGGCTGTTCTTATTACTGCCGTCCTCCTTCTCCTGTCCCTACCAGTTCTCGCTGCTGGAATTACTATGCTCCTAACAGACCGAAACTTAAACACCTCTTTCTTCGACCCGGCAGGAGGGGGAGACCCTATCTTATATCAGCACTT
>gi|381282135|gb|JQ060489.1| Liza sp. JDD-2011g isolate 108 cytochrome oxidase subunit I (COI) gene, partial cds; mitochondrial
TGCTTATCCGGGCAGAACTAAGCCAACCTGGCGCTCTCCTAGGAGACGATCAGATTTATAATGTAATCGTTACAGCACACGCTTTCGTAATAATTTTCTTTATAGTAATGCCAATCATAATCGGAGGTTTCGGAAACTGACTAATCCCTCTAATGATCGGCGCCCCTGACATAGCCTTCCCTCGAATAAACAACATAAGCTTTTGACTCCTTCCCCCCTCATTCCTTCTCCTGTTAGCATCTTCTGGCGTAGAAGCGGGGGCCGGAACTGGGTGAACTGTCTACCCCCCACTGGCTAGCAACCTAGCACATGCCGGAGCATCCGTTGACTTAACAATTTTTTCTCTCCACTTAGCAGGTGTCTCCTCAATTTTAGGTGCTATTAACTTCATCACTACCATCATTAACATGAAACCTCCCGCAATTTCCCAGTATCAAACTCCGCTCTTCGTATGGGCTGTTCTTATTACCGCCGTCCTCCTTCTCCTATCCCTACCAGTTCTCGCTGCCGGAATTACCATGCTTTTAACAGATCGAAACTTAAATACTTCTTTCTTCGACCCGGCAGGAGGGGGAGATCCCATTCTTTACCAACACCT
>gi|381282137|gb|JQ060490.1| Liza sp. JDD-2011a isolate 113 cytochrome oxidase subunit I (COI) gene, partial cds; mitochondrial
TGCTAATCCGAGCAGAACTAAGCCAACCTGGCGCTCTCCTGGGGGACGACCAGATTTATAATGTAATTGTTACAGCACACGCTTTCGTAATAATTTTCTTTATAGTAATGCCAATCATGATCGGAGGGTTCGGGAACTGACTAATTCCCCTAATGATCGGTGCCCCCGACATGGCTTTCCCTCGAATGAACAACATAAGCTTCTGACTTCTCCCTCCCTCCTTCCTCCTTCTCCTAGCATCCTCTGGTGTAGAAGCAGGGGCCGGTACGGGGTGAACCGTCTACCCTCCCCTGGCCAGCAACTTAGCACATGCCGGAGCATCCGTCGATCTAACAATTTTCTCCCTCCATCTCGCAGGTGTCTCCTCAATTCTTGGTGCAATTAACTTTATTACAACTATCATCAACATAAAACCTCCAGCAATTTCCCAATACCAGACTCCTCTCTTCGTATGGGCCGTCCTCATTACCGCTGTCCTCCTTCTCCTGTCTCTGCCAGTCCTTGCTGCAGGGATTACTATGCTCCTAACAGACCGAAATTTAAACACCTCTTTCTTCGACCCAGCGGGCGGAGGGGATCCCATTTTATATCAACACCT
>gi|381282139|gb|JQ060491.1| Liza sp. JDD-2011a isolate 114 cytochrome oxidase subunit I (COI) gene, partial cds; mitochondrial
TGCTAATCCGAGCAGAACTAAGCCAACCTGGCGCTCTCCTGGGGGACGACCAGATTTATAATGTAATTGTTACAGCACACGCTTTCGTAATAATTTTCTTTATAGTAATGCCAATCATGATCGGAGGGTTCGGGAACTGACTAATTCCCCTAATGATCGGTGCCCCCGACATGGCTTTCCCTCGAATGAACAACATAAGCTTCTGACTTCTCCCTCCCTCCTTCCTCCTTCTCCTAGCATCCTCTGGTGTAGAAGCAGGGGCCGGTACGGGGTGAACCGTCTACCCTCCCCTGGCCAGCAACTTAGCACATGCCGGAGCATCCGTCGATCTAACAATTTTCTCCCTCCATCTCGCAGGTGTCTCCTCAATTCTTGGTGCAATTAACTTTATTACAACTATCATCAACATAAAACCTCCAGCAATTTCCCAATACCAGACTCCTCTCTTCGTATGGGCCGTCCTCATTACCGCTGTCCTCCTTCTCCTGTCTCTGCCAGTCCTTGCTGCAGGGATTACTATGCTCCTAACAGACCGAAATTTAAACACCTCTTTCTTCGACCCAGCGGGCGGAGGGGATCCCATTTTATATCAACACCT
>gi|381282141|gb|JQ060492.1| Chelon sp. JDD-2011a isolate 161 cytochrome oxidase subunit I (COI) gene, partial cds; mitochondrial
TGCTTATCCGAGCAGAACTAAGCCAACCTGGTGCTCTCCTAGGAGACGACCAGATTTACAATGTAATTGTTACAGCACACGCTTTCGTAATAATTTTCTTTATAGTAATGCCAATTATGATTGGAGGGTTTGGAAACTGACTAGTCCCCTTAATGATCGGCGCCCCCGACATGGCCTTCCCTCGAATAAACAACATAAGCTTTTGACTTCTCCCTCCCTCATTCCTTCTTCTCTTGGCGTCCTCCGGCGTAGAAGCAGGGGCAGGTACCGGGTGAACCGTGTACCCTCCCCTCGCTAGCAATTTAGCGCATGCCGGGGCATCCGTCGACCTAACAATCTTCTCCCTCCACTTAGCAGGTGTATCCTCAATTTTAGGTGCTATCAACTTCATCACAACTATCATCAACATAAAACCTCCCGCAATTTCCCAATATCAGACCCCTCTATTTGTATGGGCCGTTCTTATTACCGCCGTCCTTCTCCTCCTATCTCTGCCAGTTCTTGCTGCTGGAATTACTATGCTCCTAACAGACCGAAATCTAAACACCTCCTTCTTTGACCCAGCAGGAGGAGGAGATCCTATCTTATACCAACACCT
>gi|381282143|gb|JQ060493.1| Liza sp. JDD-2011d isolate 062b cytochrome oxidase subunit I (COI) gene, partial cds; mitochondrial
TACTTATCCGAGCAGAACTAAGTCAACCTGGCGCTCTCCTGGGGGACGACCAGATCTATAATGTCATTGTTACAGCCCACGCTTTCGTAATAATTTTCTTTATAGTAATACCAATCATGATCGGGGGGTTTGGAAATTGACTAGTCCCTCTAATGATCGGCGCCCCTGATATAGCCTTCCCTCGAATGAACAATATAAGCTTTTGACTTCTTCCTCCCTCATTCCTTCTCCTCTTAGCATCCTCTGGTGTAGAAGCGGGGGCTGGGACTGGCTGAACTGTTTATCCCCCTCTAGCCGGCAACTTGGCACATGCTGGAGCATCCGTTGACCTCACAATTTTCTCCCTCCATCTAGCAGGCGTCTCCTCAATTCTAGGTGCTATTAATTTTATCACAACTATCATCAACATGAAACCTCCCGCAATTTCCCAATACCAGACCCCACTCTTCGTGTGGGCCGTTCTTATTACTGCCGTCCTCCTTCTCCTGTCCCTACCAGTTCTCGCTGCTGGAATTACTATACTCCTAACAGACCGAAACTTAAACACCTCTTTCTTCGACCCGGCAGGAGGGGGAGATCCTATTTTATATCAACACTT
>gi|381282145|gb|JQ060494.1| Liza sp. JDD-2011e isolate 057b cytochrome oxidase subunit I (COI) gene, partial cds; mitochondrial
TACTTATCCGGGCAGAACTTAGCCAGCCTGGCGCTCTCCTGGGAGACGACCAGATCTATAATGTAATCGTTACAGCGCACGCTTTCGTAATAATTTTCTTTATAGTAATACCAATCATGATTGGAGGGTTTGGAAACTGACTAATCCCCCTAATGATCGGCGCCCCTGATATGGCCTTCCCTCGAATAAATAACATAAGCTTTTGACTCCTCCCCCCTTCGTTCCTTCTTCTCTTAGCATCCTCTGGCGTAGAAGCAGGGGCCGGAACTGGGTGAACCGTCTATCCTCCCCTAGCCAGCAACCTGGCACATGCCGGAGCGTCAGTTGACTTAACAATTTTCTCCCTCCACTTAGCAGGTGTCTCCTCAATTTTAGGTGCTATTAACTTCATCACTACTATTATTAATATGAAACCTCCCGCAATCTCCCAGTATCAGACCCCCCTCTTCGTATGGGCCGTTCTTATTACTGCCGTCCTCCTTCTCCTGTCTCTGCCAGTTCTCGCTGCCGGAATTACCATACTCTTAACAGATCGAAACCTAAACACTTCTTTCTTCGACCCAGCCGGAGGTGGGGATCCTATCCTATACCAACATCTATTCTGATTCTTTGGGCACCCAGAGGTATACATTTTAATTCTCCCCGGATTCGGCATGATCTCTCACATTGTTGCATACTATGCAGGCAAAAAAGAACCTTTCGGTTACATGGGCATGGTGTGGGCCATGATGGCAATTGGCCTCTTAGGTTTTATTGTCTGAGCACATCACATGTTCACAGTCGGAATGGATGTAGACACTCGTGCCTACTTTACATCCGCCACAATAATTATTGCCATCCCAACAGGTGTTAAAGTCTTCAGCTGACTGGCAACCCTTCACGGAGGATCCCTAAAATGAGAGACACCCCTTCTCTGAGCTCTCGGGTTTATCTTTTTATTTACAGTAGGAGGCCTTACAGGTATCGTTCTAGCCAATTCTTCTTTAGATATTGTACTACACGACACATACTATGTAGTAGCACACTTCCACTACGTACTCTCTATGGGTGCAGTCTTTGCTATCATAGGAGGCTTCGTCCACTGATTCCCCCTATTCTCCGGCTATACTCTTCATGAAACATGAACAAAAATCCACTTCGGGGTAATATTCGTAGGGGTAAACTTAACCTTCTTCCCACAACACTTCCTAGGGCTAGCTGGCATGCCTCGACGATACTCTGACTACCCAGATGCCTACACCCTTTGAAACACTGTCTCCTCCATAGGCTCCCTAATCTCCTTAGTAGCAGTAATTATATTCCTGTATATTATTTGAGAAGCCTTCGCCGCTAAACGAGAAGTTCTATCAGTAGAACTCACCGCCACAAACGTAGAATGACTGCACGGGTGTCCTCCCCCTTATCA
>gi|381282147|gb|JQ060495.1| Chelon tricuspidens isolate 155 cytochrome oxidase subunit I (COI) gene, partial cds; mitochondrial
TGCTTATCCGAGCAGAACTAAGCCAACCTGGTGCTCTCCTAGGGGATGACCAGATTTACAATGTAATTGTTACGGCACACGCTTTCGTAATAATTTTCTTTATAGTAATACCAATTATGATTGGAGGGTTTGGAAACTGACTAGTCCCCTTAATGATCGGCGCCCCCGACATGGCCTTCCCTCGAATGAACAACATAAGCTTCTGGCTTCTTCCCCCCTCATTCCTTCTTCTCTTAGCATCCTCCGGTGTAGAAGCAGGGGCAGGAACTGGGTGGACTGTATACCCTCCCCTCGCCAGCAATTTAGCACATGCCGGAGCATCCGTCGACCTGACAATCTTCTCCCTCCATTTAGCAGGTGTCTCCTCAATTTTAGGTGCTATTAATTTCATCACCACCATCATCAACATAAAACCTCCTGCAATTTCTCAGTATCAGACCCCCCTATTTGTATGAGCCGTCCTTATTACCGCCGTCCTTCTCCTCTTATCTCTGCCAGTTCTTGCTGCCGGAATCACTATGCTCCTAACAGACCGAAATTTAAATACCTCTTTCTTTGACCCCGCAGGAGGAGGAGATCCTATCTTATACCAACACCTATTCTGATTCTTCGGACACCCAGAAGTATACATCCTTATCCTCCCTGGATTTGGCATGATCTCCCACATCGTTGCATACTACGCAGGCAAAAAAGAACCTTTCGGTTACATGGGCATGGTTTGAGCCATGATGGCTATCGGCCTATTAGGCTTTATTGTCTGGGCCCATCACATGTTCACAGTAGGCATGGACGTAGACACTCGTGCCTACTTTACATCCGCTACAATAATCATCGCCATCCCGACAGGCGTAAAAGTCTTTAGCTGACTGGCAACCCTTCACGGAGGATCCGTGAAGTGAGAAACACCCCTCCTCTGAGCCCTAGGGTTCATCTTTTTATTCACAGTAGGAGGTCTCACAGGGATCGTGCTAGCTAATTCTTCTTTAGACATCGTCCTTCACGACACATACTATGTAGTAGCCCATTTCCACTATGTTCTCTCTATGGGCGCAGTCTTCGCCATCATAGGAGGCTTTGTTCACTGGTTCCCCCTATTCTCTGGCTATACCCTCCACGAAACATGAACAAAAATCCACTTCGGAGTAATATTCGTAGGGGTCAACCTAACTTTCTTCCCCCAACACTTCCTAGGGCTAGCCGGTATGCCCCGACGCTACTCTGACTACCCAGATGCCTACACCCTTTGAAATACTGTTTCCTCAATAGGCTCCCTAGTTTCCCTAGTAGCAGTAATCATGTTCCTGTACATCCTTTGAGAGGCATTCGTTGCTAAACGAGAAGTTCTATCAGTAAAACTCACTACCACAAACGTAGAATGACTACATGGATGCCCGCCTCCTTATCA
>gi|381282149|gb|JQ060496.1| Moolgarda cunnesius isolate 275 cytochrome oxidase subunit I (COI) gene, partial cds; mitochondrial
TTCTTATCCGAGCAGAACTCAGCCAACCTGGGGCTCTTCTAGGGGACGATCAAATTTACAATGTAATTGTTACGGCACACGCTTTCGTAATAATTTTCTTTATAGTGATGCCAATTATGATTGGTGGGTTTGGAAATTGACTAATCCCATTAATGATCGGAGCGCCAGATATAGCATTCCCCCGAATAAATAATATAAGCTTCTGGCTTCTCCCCCCTTCATTTCTTCTCCTGCTAGCATCCTCTGCAGTAGAAGCAGGAGCTGGTACAGGGTGAACTGTTTACCCACCTCTTGCCAGCAACCTAGCGCATGCTGGGGCATCTGTCGACCTTACTATCTTTTCCCTTCATCTGGCAGGAGTTTCCTCGATTTTAGGTGCTATTAACTTCATTACAACCATTATCAACATGAAACCCCCCGCTATTTCTCAATACCAAACCCCCCTGTTTGTATGAGCAGTTCTTATTACAGCCGTACTCCTTCTTCTATCTTTACCAGTTCTTGCTGCCGGAATCACTATACTCCTAACAGACCGAAACTTAAACACCTCTTTCTTCGACCCTGCAGGAGGGGGCGACCCAATTCTGTACCAACATCT
>gi|381282151|gb|JQ060497.1| Moolgarda cunnesius isolate 276 cytochrome oxidase subunit I (COI) gene, partial cds; mitochondrial
TTCTTATCCGAGCAGAACTCAGCCAACCTGGGGCCCTTCTTGGGGACGATCAGATTTACAATGTGATTGTTACGGCACATGCTTTCGTAATAATTTTCTTTATAGTGATGCCAATTATGATCGGTGGGTTTGGAAATTGACTTATCCCATTAATGATTGGGGCACCAGATATAGCATTCCCCCGAATAAATAACATAAGCTTCTGGCTTCTTCCCCCTTCATTTCTTCTCCTCCTGGCATCCTCTGCAGTAGAGGCTGGGGCCGGTACAGGATGAACTGTTTACCCGCCTCTCGCCAGCAACCTAGCACATGCTGGAGCATCCGTTGACCTTACTATCTTTTCCCTTCATCTGGCAGGGGTTTCCTCAATTTTAGGTGCTATTAATTTTATTACAACTATTATTAATATAAAACCTCCTGCTATCTCTCAGTACCAAACCCCTCTATTTGTATGAGCAGTTCTTATTACAGCTGTCCTTCTTCTTCTTTCTTTACCAGTTCTCGCTGCTGGGATTACTATGCTCCTAACAGATCGAAACTTAAATACCTCTTTCTTCGATCCTGCAGGGGGAGGAGATCCGATTCTATACCAACATCT
>gi|381282153|gb|JQ060498.1| Moolgarda cunnesius isolate 278 cytochrome oxidase subunit I (COI) gene, partial cds; mitochondrial
TTCTTATCCGAGCAGAACTCAGCCAGCCCGGGGCTCTTCTGGGGGACGACCAGATCTATAATGTAATTGTAACGGCACACGCTTTCGTAATAATTTTCTTTATAGTGATACCAATCATGATTGGAGGATTTGGAAATTGGCTTATCCCCTTAATAATTGGAGCACCAGACATAGCATTCCCCCGAATAAACAACATAAGCTTCTGGCTTCTCCCCCCTTCATTTCTTCTTCTCCTAGCATCCTCTGCAGTTGAAGCAGGAGCTGGTACAGGATGAACTGTCTACCCGCCTCTTGCCAGCAATCTAGCACACGCCGGGGCATCTGTTGACCTTACCATCTTCTCCCTCCATCTGGCAGGGGTATCCTCAATTTTAGGTGCCATTAACTTCATTACAACCATTATTAATATAAAACCCCCCGCTATCTCCCAGTATCAAACCCCTCTATTTGTATGAGCAGTTCTCATCACAGCTGTCCTTCTCCTCTTATCTTTACCAGTCCTTGCTGCCGGAATCACAATACTTCTTACAGATCGAAACTTAAATACCTCTTTCTTCGACCCTGCAGGAGGAGGGGATCCAATTCTATACCAGCACCTCTTCTGATTCTTTGGTCACCCAGAAGTCTACATCCTCATCCTCCCTGGCTTCGGCATGATTTCTCATATTGTTGCCTACTATGCAGGGAAAAAAGAACCTTTTGGTTATATGGGAATAGTCTGAGCTATAATGGCTATCGGCCTGCTGGGATTTATTGTCTGAGCCCACCATATATTTACTGTTGGTATAGACGTAGATACTCGAGCATATTTTACATCTGCAACAATGATTATTGCTATTCCGACAGGCGTAAAAGTCTTTAGCTGACTAGCAACGCTTCATGGGGGGTCTGTAAAATGAGAAACACCCCTGCTCTGGGCTCTGGGCTTTATTTTCCTATTCACAGTCGGAGGACTAACAGGAATTGTCTTAGCCAACTCTTCTTTAGACATCGTTTTACACGACACATATTATGTAGTAGCCCACTTCCACTATGTCCTATCAATAGGAGCAGTATTTGCTATTATAGGAGGATTTGTGCACTGGTTCCCCTTATTCTCTGGCTTCACTCTTCATGAAACATGGACAAAAATTCACTTCGGGGTAATATTCGTAGGGGTTAACCTTACCTTCTTCCCTCAACACTTCCTTGGCCTAGCTGGAATACCTCGACGATACTCTGATTACCCAGATGCCTACACACTCTGAAATACTATCTCCTCAATAGGCTCACTTATTTCCCTAGTAGCAGTAATTATATTCCTCTATATTATTTGAGAAGCCTTCGTTACTAAACGAGAAGTAATAACAGTAGAAATAACCTCCACAAACGTGGAATGACTTCACGGATGCCCTCC
>gi|381282155|gb|JQ060499.1| Moolgarda cunnesius isolate 276b cytochrome oxidase subunit I (COI) gene, partial cds; mitochondrial
TTCTTATCCGAGCAGAACTCAGCCAACCTGGGGCCCTTCTTGGGGACGATCAGATTTACAATGTGATTGTTACGGCACATGCTTTCGTAATAATTTTCTTTATAGTGATGCCAATTATGATCGGTGGGTTTGGAAATTGACTTATCCCATTAATGATCGGGGCACCAGATATAGCATTCCCCCGAATAAATAACATAAGCTTCTGGCTTCTTCCCCCTTCATTTCTCCTCCTCCTGGCATCCTCTGCAGTAGAGGCTGGAGCCGGTACAGGATGAACTGTTTACCCGCCTCTCGCCAGCAACCTAGCACATGCTGGAGCATCCGTTGACCTTACTATCTTTTCCCTCCATCTGGCAGGGGTTTCCTCAATTTTAGGTGCTATTAATTTTATTACAACTATTATTAATATAAAACCTCCTGCTATCTCTCAGTACCAAACCCCTCTATTTGTATGAGCAGTTCTTATTACAGCTGTCCTTCTTCTTCTTTCTTTACCAGTTCTCGCTGCTGGGATTACTATGCTCCTAACAGATCGAAACTTAAATACCTCTTTCTTCGATCCTGCAGGGGGAGGAGATCCGATTCTATACCAACATCT
>gi|381282157|gb|JQ060500.1| Moolgarda engeli isolate 198 cytochrome oxidase subunit I (COI) gene, partial cds; mitochondrial
TCCTTATCCGAGCTGAGCTGAGCCAACCTGGGGCCCTCCTAGGGGACGATCAGATTTATAATGTAATCGTAACAGCCCACGCTTTCGTAATAATTTTCTTTATAGTAATACCAATTATGATTGGAGGGTTTGGAAACTGACTCGTCCCTTTAATGATTGGTGCGCCAGACATAGCATTCCCTCGAATAAACAACATAAGCTTCTGGCTCCTTCCCCCTTCATTCCTCCTCCTTTTAGCATCCTCTGCAGTAGAAGCAGGGGCTGGCACAGGATGAACTGTTTACCCACCCCTCGCCAGCAACCTAGCACACGCCGGGGCATCCGTCGACCTCACCATTTTCTCCCTCCATCTAGCAGGGGTATCCTCAATTTTAGGTGCCATCAACTTCATTACTACTATTATTAATATGAAACCCCCTGCAATTTCTCAATACCAAACCCCCCTATTTGTTTGGGCAGTACTAATTACAGCCGTACTTCTTCTCCTGTCCCTACCAGTTCTTGCTGCTGGCATTACCATACTCCTTACGGATCGAAACCTAAACACCTCTTTCTTTGACCCAGCAGGAGGTGGAGATCCAATTCTATACCAACATCT
>gi|381282159|gb|JQ060501.1| Moolgarda engeli isolate 200 cytochrome oxidase subunit I (COI) gene, partial cds; mitochondrial
TCCTTATCCGAGCTGAGCTGAGCCAACCTGGGGCCCTCCTAGGGGACGATCAGATTTATAATGTAATCGTAACAGCCCACGCTTTCGTAATAATTTTCTTTATAGTAATACCAATTATGATTGGAGGGTTTGGAAACTGACTCGTCCCTTTAATGATTGGTGCGCCAGACATAGCATTCCCTCGAATAAACAACATAAGCTTCTGGCTCCTTCCCCCTTCATTCCTCCTCCTTTTAGCATCCTCTGCAGTAGAAGCAGGGGCTGGCACAGGATGAACTGTTTACCCACCCCTCGCCAGCAACCTAGCACACGCCGGGGCATCCGTCGACCTCACCATTTTCTCCCTCCATCTAGCAGGGGTATCCTCAATTTTAGGTGCCATCAACTTCATTACTACTATTATTAATATGAAACCCCCTGCAATTTCTCAATACCAAACCCCCCTATTTGTTTGGGCAGTACTAATTACAGCCGTACTTCTTCTCCTGTCTCTACCAGTTCTTGCTGCTGGCATTACCATACTCCTTACGGATCGAAACCTAAACACCTCTTTCTTTGACCCAGCAGGAGGTGGAGATCCAATTCTATACCAACATCT
>gi|381282161|gb|JQ060502.1| Moolgarda engeli isolate 201 cytochrome oxidase subunit I (COI) gene, partial cds; mitochondrial
TCCTTATCCGAGCTGAGCTGAGCCAACCTGGGGCCCTCCTAGGGGACGATCAGATTTATAATGTAATCGTAACAGCCCACGCTTTCGTAATAATTTTCTTTATAGTAATACCAATTATGATTGGAGGGTTTGGAAACTGACTCGTCCCTTTAATGATTGGTGCGCCAGACATAGCATTCCCTCGAATAAACAACATAAGCTTCTGGCTCCTTCCCCCTTCATTCCTCCTCCTTTTAGCATCCTCTGCAGTAGAAGCAGGGGCTGGCACAGGATGAACTGTTTACCCACCCCTCGCCAGCAACCTAGCACACGCCGGGGCATCCGTCGACCTCACCATTTTCTCCCTCCATCTAGCAGGGGTATCCTCAATTTTAGGTGCCATCAACTTCATTACTACTATTATTAATATGAAACCCCCTGCAATTTCTCAATACCAAACCCCCCTATTTGTTTGGGCAGTACTAATTACAGCCGTACTTCTTCTCCTGTCTCTACCAGTTCTTGCTGCTGGCATTACCATACTCCTTACGGATCGAAACCTAAACACCTCTTTCTTTGACCCAGCAGGAGGTGGAGATCCAATTCTATACCAACATCTCTTCTGATTCTTTGGACACCCAGAAGTTTATATTCTTATCCTTCCTGGCTTCGGTATAATTTCCCACATTGTTGCATACTACGCAGGGAAAAAAGAACCTTTCGGTTACATAGGAATGGTTTGAGCCATGATGGCCATTGGCCTACTAGGGTTTATTGTCTGAGCCCACCACATGTTCACCGTCGGTATAGATGTAGATACACGAGCATACTTTACATCCGCAACAATAATTATTGCCATCCCAACAGGCGTAAAAGTGTTTAGCTGACTGGCAACACTTCACGGAGGGTCCGTTAAATGAGAAACACCTCTCCTATGGGCCCTAGGCTTTATTTTCCTATTTACAGTGGGTGGACTTACAGGAATTGTCTTAGCCAACTCCTCCTTAGACATCGTGCTACAT
>gi|381282163|gb|JQ060503.1| Moolgarda engeli isolate 203 cytochrome oxidase subunit I (COI) gene, partial cds; mitochondrial
TCCTTATCCGAGCTGAGCTGAGCCAACCTGGGGCCCTCCTAGGGGACGATCAGATTTATAATGTAATCGTAACAGCCCACGCTTTCGTAATAATTTTCTTTATAGTAATACCAATTATGATTGGAGGGTTTGGAAACTGACTCGTCCCTTTAATGATTGGTGCGCCAGACATAGCATTCCCTCGAATAAACAACATAAGCTTCTGGCTCCTTCCCCCTTCATTCCTCCTCCTTTTAGCATCCTCTGCAGTAGAAGCAGGGGCTGGCACAGGATGAACTGTTTACCCACCCCTCGCCAGCAACCTAGCACACGCCGGGGCATCCGTCGACCTCACCATTTTCTCCCTCCATCTAGCAGGGGTATCCTCAATTTTAGGTGCCATCAACTTCATTACTACTATTATTAATATGAAACCCCCTGCAATTTCTCAATACCAAACCCCCCTATTTGTTTGGGCAGTACTAATTACAGCCGTACTTCTTCTCCTGTCTCTACCAGTTCTTGCTGCTGGCATTACCATACTCCTTACGGATCGAAACCTAAACACCTCTTTCTTTGACCCAGCAGGAGGTGGAGATCCAATTCTATACCAACATCT
>gi|381282165|gb|JQ060504.1| Moolgarda perusii isolate 264 cytochrome oxidase subunit I (COI) gene, partial cds; mitochondrial
TTCTTATCCGAGCAGAACTCAGTCAGCCTGGGGCTCTTCTAGGGGACGATCAGATTTACAATGTAATCGTTACGGCACACGCTTTCGTAATAATTTTCTTTATAGTGATGCCAATTATAATCGGTGGGTTTGGAAATTGACTAATCCCATTAATGATTGGAGCACCAGATATAGCATTCCCACGAATAAATAATATAAGCTTCTGGCTTCTCCCTCCTTCATTTCTTCTCCTTCTAGCATCCTCTGCAGTAGAAGCAGGAGCTGGCACAGGATGAACCGTTTACCCACCTCTAGCCAGCAACCTGGCACATGCTGGGGCATCTGTCGACCTTACTATCTTCTCTCTTCATCTGGCTGGAGTTTCCTCGATTTTAGGTGCTATTAACTTCATTACAACCATCATCAACATGAAACCCCCCGCCATTTCTCAGTACCAGACCCCTCTGTTTGTATGAGCAGTTCTTATTACAGCTGTACTTCTTCTTCTATCTTTACCAGTTCTTGCTGCTGGTATCACTATGCTCCTGACAGACCGAAACTTAAACACCTCTTTCTTCGACCCTGCAGGAGGGGGTGATCCAATTCTGTACCAACATCTCTTCTGATTCTTCGGACATCCAGAAGTTCATATTCTAATTCTTCCTGGCTTCGGTATAATCTCCCATATCGTTGCCTTTTATGCAGGTAAAAAAGAGCCTTTCGGTTACATAGGAATGGTCTGAGCCATGATGGCTATCGGCCTGCTGGGCTTTATTGTCTGAGCCCACCACATGTTCACCGTTGGAATGGATGTAGACACTCGGGCATATTTTACGTCTGCAACAATAATCATTGCTATCCCAACGGGCGTAAAAGTCTTTAGTTGATTAGCAACGCTTCACGGGGGATCTGTGAAATGAGAGACACCTCTCCTCTGAGCTCTAGGCTTTATTTTCCTATTTACAGTAGGAGGACTGACAGGGATTGTCTTAGCCAACTCTTCCTTAGATATTGTTCTTCACGACACATATTATGTAGTAGCCCACTTCCATTACGTCCTATCAATAGGAGCAGTCTTTGCTATTATAGGAGGCTTTGTGCACTGATTCCCTCTATTTTCTGGCTACACCCTCCATGAGACATGAACAAAAATTCACTTTGGAGTAATATTTGTAGGGGTTAACCTTACCTTCTTCCCCCAACATTTCCTAGGCTTAGCCGGAATACCTCGACGATACTCTGACTATCCAGATGCTTACACACTCTGAAATACTATTTCCTCAATAGGCTCACTCATCTCCCTAGTAGCAGTAATTATGTTCCTATACATTATCTGAGAAGCATTTGTCACTAAACGAGAGGTTATGACAGTAGAAATAACTTCAACAAACGTAGAGTGACTTCATGGATGCCCTCCACCATACCA
>gi|381282167|gb|JQ060505.1| Moolgarda perusii isolate 274 cytochrome oxidase subunit I (COI) gene, partial cds; mitochondrial
TTCTTATCCGAGCAGAACTCAGTCAGCCTGGGGCTCTTCTAGGGGACGATCAGATTTACAATGTAATTGTTACGGCACACGCTTTCGTAATAATTTTCTTTATAGTGATGCCAATTATAATTGGTGGGTTTGGAAATTGACTAATCCCATTAATGATCGGGGCACCAGATATAGCATTCCCACGAATAAATAATATAAGCTTCTGGCTTCTCCCTCCTTCATTTCTTCTCCTTCTAGCATCCTCTGCAGTAGAAGCAGGAGCTGGCACAGGATGAACTGTTTACCCGCCTCTTGCCAGCAACCTGGCACATGCTGGGGCATCTGTCGACCTTACTATCTTTTCTCTTCATCTGGCTGGGGTCTCCTCGATTTTAGGTGCTATTAACTTCATTACAACCATTATCAACATGAAACCCCCTGCCATTTCTCAATACCAGACCCCTCTGTTTGTATGAGCAGTTCTTATTACAGCTGTACTTCTTCTTCTATCTTTACCAGTTCTTGCTGCTGGCATCACTATACTCCTGACAGACCGAAACTTAAACACCTCTTTCTTCGACCCTGCAGGAGGGGGTGATCCAATTCTGTACCAACATCT
>gi|381282169|gb|JQ060506.1| Moolgarda seheli isolate 204 cytochrome oxidase subunit I (COI) gene, partial cds; mitochondrial
TTCTCATCCGAGCAGAACTAAGCCAGCCTGGCGCTCTCCTGGGAGACGACCAGATTTATAATGTAATCGTAACTGCTCACGCCTTCGTGATAATCTTCTTTATAGTAATACCAATCATGATTGGAGGGTTCGGGAATTGACTTGTCCCTTTAATGATTGGCGCCCCAGACATAGCCTTCCCCCGAATAAATAACATGAGTTTTTGGCTGCTTCCCCCTTCTTTCCTCCTTCTCTTAGCGTCATCGGCAGTTGAAGCAGGGGCCGGGACAGGATGAACTGTCTACCCACCTCTCGCTAGCAACTTGGCACACGCCGGAGCATCCGTCGACTTAACCATCTTCTCCCTCCATCTGGCAGGTGTCTCCTCAATTTTAGGTGCTATTAATTTTATTACCACTATTATTAACATGAAACCCCCTGCCATCTCTCAATACCAAACACCCCTATTCGTATGGGCAGTTCTTATCACGGCCGTCCTTCTTCTCCTGTCCCTCCCAGTTCTTGCTGCTGGAATCACAATACTCCTTACAGATCGAAACCTAAACACCTCTTTCTTTGACCCTGCAGGAGGGGGAGACCCAATTCTTTACCAACATCT
>gi|381282171|gb|JQ060507.1| Moolgarda seheli isolate 205 cytochrome oxidase subunit I (COI) gene, partial cds; mitochondrial
CCTGAGCCTTCTCATCCGAGCAGAACTAAGCCAGCCTGGCGCTCTCCTGGGAGACGACCAGATTTATAATGTAATCGTAACTGCTCACGCCTTCGTGATAATCTTCTTTATAGTAATACCAATCATGATTGGAGGGTTCGGGAATTGACTTGTCCCTTTAATGATTGGCGCCCCAGACATAGCCTTCCCCCGAATAAATAACATGAGTTTTTGGCTGCTTCCCCCTTCTTTCCTCCTTCTCTTAGCGTCATCGGCAGTTGAAGCAGGGGCCGGGACAGGATGAACTGTCTACCCACCTCTCGCTAGCAACTTGGCACACGCCGGAGCATCCGTCGACTTAACCATCTTCTCCCTCCATCTGGCAGGTGTCTCCTCAATTTTAGGTGCTATTAATTTTATTACCACTATTATTAACATGAAACCCCCTGCCATCTCTCAATACCAAACACCCCTATTCGTATGGGCAGTTCTTATCACGGCCGTCCTTCTTCTCCTGTCCCTCCCAGTTCTTGCTGCTGGAATCACAATACTCCTTACAGATCGAAACCTAAACACCTCTTTCTTTGACCCTGCAGGAGGGGGAGACCCAATTCTTTACCAACATCT
>gi|381282173|gb|JQ060508.1| Moolgarda seheli isolate 206 cytochrome oxidase subunit I (COI) gene, partial cds; mitochondrial
TTCTCATCCGAGCAGAACTAAGCCAGCCTGGCGCTCTCCTGGGAGACGACCAGATTTATAATGTAATCGTAACTGCTCACGCCTTCGTGATAATCTTCTTTATAGTAATACCAATCATGATTGGAGGGTTCGGGAATTGACTTGTCCCTTTAATGATTGGCGCCCCAGACATAGCCTTCCCCCGAATAAATAACATGAGTTTTTGGCTGCTTCCCCCTTCTTTCCTCCTTCTCTTAGCGTCATCGGCAGTTGAAGCAGGGGCCGGGACAGGATGAACTGTCTACCCACCTCTCGCTAGCAACTTGGCACACGCCGGAGCATCCGTCGACTTAACCATCTTCTCCCTCCATCTGGCAGGTGTCTCCTCAATTTTAGGTGCTATTAATTTTATTACCACTATTATTAACATGAAACCCCCTGCCATCTCTCAATACCAAACACCCCTATTCGTATGGGCAGTTCTTATCACGGCCGTCCTTCTTCTCCTGTCCCTCCCAGTTCTTGCTGCTGGAATCACAATACTCCTTACAGATCGAAACCTAAACACCTCTTTCTTTGACCCTGCAGGAGGGGGAGACCCAATTCTTTACCAACATCT
>gi|381282175|gb|JQ060509.1| Moolgarda seheli isolate 207 cytochrome oxidase subunit I (COI) gene, partial cds; mitochondrial
TTCTCATCCGAGCAGAACTAAGCCAGCCTGGCGCTCTCCTGGGAGACGACCAGATTTATAATGTAATCGTAACTGCTCACGCCTTCGTGATAATCTTCTTTATAGTAATACCAATCATGATTGGAGGGTTCGGGAATTGACTTGTCCCTTTAATGATTGGCGCCCCAGACATAGCCTTCCCCCGAATAAATAACATGAGTTTTTGGCTGCTTCCCCCTTCTTTCCTCCTTCTCTTAGCGTCATCGGCAGTTGAAGCAGGGGCCGGGACAGGATGAACTGTCTACCCACCTCTCGCTAGCAACTTGGCACACGCCGGAGCATCCGTCGACTTAACCATCTTCTCCCTCCATCTGGCAGGTGTCTCCTCAATTTTAGGTGCTATTAATTTTATTACCACTATTATTAACATGAAACCCCCTGCCATCTCTCAATACCAAACACCCCTATTCGTATGGGCAGTTCTTATCACGGCCGTCCTTCTTCTCCTGTCCCTCCCAGTTCTTGCTGCTGGAATCACAATACTCCTTACAGATCGAAACCTAAACACCTCTTTCTTTGACCCTGCAGGAGGGGGAGACCCAATTCTTTACCAACATCT
>gi|381282177|gb|JQ060510.1| Moolgarda seheli isolate 210 cytochrome oxidase subunit I (COI) gene, partial cds; mitochondrial
TTCTCATCCGAGCAGAACTAAGCCAGCCTGGCGCTCTCCTGGGAGACGACCAGATTTATAATGTAATCGTAACTGCTCACGCCTTCGTGATAATCTTCTTTATAGTAATACCAATCATGATTGGAGGGTTCGGGAATTGACTTGTCCCTTTAATGATTGGCGCCCCAGACATAGCCTTCCCCCGAATAAATAACATGAGTTTTTGGCTGCTTCCCCCTTCTTTCCTCCTTCTCTTAGCGTCATCGGCAGTTGAAGCAGGGGCCGGGACAGGATGAACTGTCTACCCACCTCTCGCTAGCAACTTGGCACACGCCGGAGCATCCGTCGACTTAACCATCTTCTCCCTCCATCTGGCAGGTGTCTCCTCAATTTTAGGTGCTATTAATTTTATTACCACTATTATTAACATGAAACCCCCTGCCATCTCTCAATACCAAACACCCCTGTTCGTATGGGCAGTTCTTATCACGGCCGTCCTTCTTCTCCTGTCCCTCCCAGTTCTTGCTGCTGGAATCACAATACTCCTTACAGATCGAAACCTAAACACCTCTTTCTTTGACCCTGCAGGAGGGGGAGACCCAATTCTTTACCAACATCT
>gi|381282179|gb|JQ060511.1| Moolgarda seheli isolate 217 cytochrome oxidase subunit I (COI) gene, partial cds; mitochondrial
TTCTCATCCGAGCAGAACTAAGCCAGCCTGGCGCTCTCCTGGGAGACGACCAGATTTATAATGTAATCGTAACTGCTCACGCCTTCGTGATAATCTTCTTTATAGTAATACCAATCATGATTGGAGGGTTCGGGAATTGACTTATCCCTCTAATGATCGGCGCCCCAGACATAGCCTTCCCCCGAATAAATAACATGAGTTTTTGACTGCTTCCCCCTTCCTTCCTCCTTCTCTTAGCGTCATCGGCAGTTGAAGCAGGAGCCGGGACAGGATGAACTGTCTACCCGCCTCTCGCCAGCAACTTGGCACACGCCGGAGCATCCGTCGACTTAACCATCTTCTCCCTCCATCTGGCAGGTGTCTCCTCAATCTTAGGTGCTATTAATTTTATTACCACTATTATTAACATGAAACCCCCTGCCATCTCTCAATACCAAACTCCCCTATTCGTATGGGCAGTGCTTATCACGGCCGTCCTGCTTCTTCTGTCCCTCCCAGTTCTTGCTGCTGGAATCACAATACTCCTAACAGATCGAAACCTAAACACCTCTTTCTTTGACCCTGCAGGAGGGGGAGACCCAATTCTTTACCAACATCT
>gi|381282181|gb|JQ060512.1| Moolgarda seheli isolate 218 cytochrome oxidase subunit I (COI) gene, partial cds; mitochondrial
TTCTCATCCGAGCAGAACTAAGCCAGCCTGGCGCTCTCCTGGGAGACGACCAGATTTATAATGTAATCGTAACCGCTCACGCCTTCGTGATAATCTTCTTTATAGTAATACCAATCATGATTGGAGGGTTCGGGAATTGACTTATCCCTCTAATGATCGGCGCCCCAGACATAGCCTTCCCCCGAATAAATAANATGAGTTTTTGACTGCTTCCCCCTTCCTTCCTCCTTCTCTTAGCGTCATCGGCAGTTGAAGCAGGAGCCGGGACAGGATGAACTGTCTACCCGCCTCTCGCCAGCAACTTGGCACACGCCGGAGCATCCGTCGACTTAACCATCTTCTCCCTCCATCTGGCAGGTGTCTCCTCAATCTTAGGTGCTATTAATTTTATTACCACTATTATTAACATGAAACCCCCTGCCATCTCTCAATACCAAACTCCCCTATTCGTATGGGCAGTGCTTATCACGGCCGTCCTGCTTCTTCTGTCCCTCCCAGTTCTTGCTGCTGGAATCACAATACTCCTAACAGATCGAAACCTAAACACCTCTTTCTTTGACCCTGCAGGAGGGGGAGACCCAATTCTTTACCAACATCT
>gi|381282183|gb|JQ060513.1| Moolgarda seheli isolate 220 cytochrome oxidase subunit I (COI) gene, partial cds; mitochondrial
TTCTTATCCGAGCAGAACTAAGCCAACCTGGCGCTCTCCTAGGGGACGACCAGATTTATAATGTAATCGTAACTGCTCACGCCTTCGTGATGATTTTCTTTATAGTAATGCCAATCATGATTGGAGGGTTCGGGAATTGACTCGTCCCTTTAATGATTGGTGCACCTGACATAGCATTCCCTCGAATAAATAACATGAGCTTTTGACTGCTTCCCCCATCATTCCTCCTTCTCTTAGCGTCATCGGCAGTTGAAGCAGGGGCTGGAACAGGATGAACTGTCTACCCACCGCTCGCTAGCAATTTAGCACACGCCGGAGCATCCGTTGACTTAACCATCTTCTCCCTTCATCTGGCAGGTGTCTCCTCAATTTTAGGTGCCATTAATTTTATTACAACTATTATTAACATGAAACCCCCTGCAATCTCTCAATACCAAACGCCCCTCTTCGTATGGGCAGTTCTTATCACGGCCGTCCTTCTTCTCCTGTCCCTTCCAGTTCTTGCTGCTGGCATCACGATACTCCTGACAGATCGAAACCTAAACACCTCTTTCTTTGACCCTGCAGGAGGGGGAGACCCAATTCTTTATCAACACCT
>gi|381282185|gb|JQ060514.1| Moolgarda seheli isolate 225 cytochrome oxidase subunit I (COI) gene, partial cds; mitochondrial
TTCTTATCCGAGCAGAACTAAGCCAACCTGGCGCTCTCCTAGGGGACGACCAGATTTATAATGTAATCGTAACTGCTCACGCCTTCGTGATGATTTTCTTTATAGTAATGCCAATCATGATTGGAGGGTTCGGGAATTGACTCGTCCCTTTAATGATTGGTGCACCTGACATAGCATTCCCTCGAATAAATAACATGAGCTTTTGACTGCTTCCCCCATCATTCCTCCTTCTCTTAGCGTCATCGGCAGTTGAAGCAGGGGCTGGAACAGGATGAACTGTCTACCCCCCACTCGCTAGCAATTTAGCACACGCCGGAGCATCCGTTGACTTAACCATTTTCTCCCTTCATCTGGCAGGTGTCTCCTCAATTTTAGGTGCCATTAATTTTATCACAACTATTATTAACATGAAACCCCCTGCAATCTCTCAATACCAAACGCCCCTCTTCGTATGGGCAGTTCTTATCACGGCCGTCCTTCTTCTCCTGTCCCTCCCAGTTCTTGCTGCTGGCATCACAATACTCCTAACAGATCGAAACCTAAACACCTCTTTCTTTGACCCTGCAGGAGGGGGAGACCCAATTCTTTACCAACACCT
>gi|381282187|gb|JQ060515.1| Moolgarda seheli isolate 226 cytochrome oxidase subunit I (COI) gene, partial cds; mitochondrial
TTCTTATCCGAGCAGAACTAAGCCAACCTGGCGCTCTCCTAGGGGACGACCAGATTTATAATGTAATCGTAACTGCTCACGCCTTCGTGATGATTTTCTTTATAGTAATGCCAATCATGATTGGAGGGTTCGGGAATTGACTCGTCCCTTTAATGATTGGTGCACCTGACATAGCATTCCCTCGAATAAATAACATGAGCTTTTGACTGCTTCCCCCATCATTCCTCCTTCTCTTAGCGTCATCGGCAGTTGAAGCAGGGGCTGGAACAGGATGAACTGTCTACCCCCCACTCGCTAGCAATTTAGCACACGCCGGAGCATCCGTTGACTTAACCATTTTCTCCCTTCATCTGGCAGGTGTCTCCTCAATTTTAGGTGCCATTAATTTTATCACAACTATTATTAACATGAAACCCCCTGCAATCTCTCAATACCAAACGCCCCTCTTCGTATGGGCAGTTCTTATCACGGCCGTCCTTCTTCTCCTGTCCCTCCCAGTTCTTGCTGCTGGCATCACAATACTCCTGACAGATCGAAACCTAAACACCTCTTTCTTTGACCCTGCAGGAGGGGGAGACCCAATTCTTTACCAACACCT
>gi|381282189|gb|JQ060516.1| Moolgarda seheli isolate 234 cytochrome oxidase subunit I (COI) gene, partial cds; mitochondrial
TTCTTATCCGAGCAGAACTAAGCCAACCTGGCGCTCTCCTGGGGGACGACCAGATTTATAATGTAATCGTTACAGCTCACGCTTTCGTGATGATTTTCTTTATAGTAATACCAATCATGATCGGAGGGTTCGGGAATTGACTAATCCCCCTAATGATCGGCGCACCAGATATAGCATTCCCTCGAATAAACAACATGAGCTTTTGACTACTTCCCCCCTCATTCCTCCTTCTCTTAGCATCTTCGGCAGTAGAAGCAGGGGCTGGGACAGGATGAACTGTTTACCCACCTCTCGCCAGCAATCTAGCCCATGCCGGAGCATCCGTTGACTTAACTATTTTCTCCCTCCATTTAGCAGGTGTCTCCTCAATTTTAGGTGCTATTAATTTTATTACAACTATTATTAACATGAAACCCCCTGCAATTTCTCAATACCAAACACCTCTCTTTGTATGGGCAGTTCTTATCACGGCCGTCCTTCTTCTCCTATCCCTGCCAGTTCTTGCTGCTGGGATCACAATGCTCCTAACAGATCGAAACCTAAACACCTCTTTCTTCGACCCTGCAGGAGGAGGGGACCCGATTCTCTACCAACACCTATTCTGATTCTTTGGACACCCAGAAGTTTACATTCTCATCCTCCCCGGCTTTGGTATGATCTCCCACATTGTCGCATACTATGCAGGCAAAAAAGAACCCTTTGGCTATATAGGAATGGTTTGAGCCATGATGGCCATCGGCCTTCTGGGCTTCATTGTTTGAGCCCACCACATGTTCACCGTTGGTATGGACGTAGATACTCGTGCATACTTTACATCCGCTACAATAATCATTGCCATTCCAACAGGTGTAAAAGTCTTTAGCTGACTAGCAACCCTTCACGGAGGGTCTGTGAAATGAGAAACGCCCCTTCTTTGAGCCCTAGGCTTTATTTTCCTATTTACAGTAGGGGGACTTACAGGAATTGTCTTAGCCAACTCCTCCCTAGACATCGTTCTACATGATACATATTATGTAGTAGCCCATTTCCACTACGATA
>gi|381282191|gb|JQ060517.1| Moolgarda seheli isolate 235 cytochrome oxidase subunit I (COI) gene, partial cds; mitochondrial
TTCTTATCCGAGCAGAACTAAGCCAACCTGGCGCTCTCCTGGGGGACGACCAGATTTATAATGTAATCGTTACAGCTCACGCTTTCGTGATGATTTTCTTTATAGTAATACCAATCATGATCGGAGGGTTCGGGAATTGACTAATCCCCCTAATGATCGGCGCACCAGATATAGCATTCCCTCGAATAAACAACATGAGCTTTTGACTACTTCCCCCCTCATTCCTCCTTCTCTTAGCATCTTCGGCAGTAGAAGCAGGGGCTGGGACAGGATGTACTGTTTACCCACCTCTCGCCAGCAATCTAGCCCATGCCGGAGCATCCGTTGACTTAACTATTTTCTCCCTCCATTTAGCAGGTGTCTCCTCAATTTTAGGTGCTATTAATTTTATTACAACTATTATTAACATGAAGCCCCCTGCAATTTCTCAATACCAAACACCTCTCTTTGTATGGGCAGTTCTTATCACGGCCTTCCTTCTTCTCCTATCCCTGCCAGTTCTTGCTGCTGGGATCACAATGCTCCTAACAGATCGAAACCTAAACAGCTCTTTCTTCGACCCTGCAGGAGGAGGGGACCCGATTCTCTACCAACACCT
>gi|381282193|gb|JQ060518.1| Moolgarda sp. JDD-2011a isolate 212 cytochrome oxidase subunit I (COI) gene, partial cds; mitochondrial
TTCTCATCCGAGCAGAACTAAGCCAGCCTGGCGCTCTCCTGGGAGACGACCAGATTTATAATGTAATCGTAACTGCTCACGCCTTCGTGATAATCTTCTTTATAGTAATACCAATCATGATTGGAGGGTTCGGGAATTGACTTGTCCCTTTAATGATTGGCGCCCCAGACATAGCCTTCCCCCGAATAAATAACATGAGTTTCTGGCTGCTTCCCCCTTCTTTCCTCCTTCTCTTAGCGTCATCGGCAGTTGAAGCAGGGGCCGGGACAGGATGAACTGTCTACCCACCTCTCGCTAGCAACTTGGCACACGCCGGAGCATCCGTCGACTTAACCATCTTCTCCCTCCATCTGGCAGGTGTCTCCTCAATTTTAGGTGCTATTAATTTTATTACCACTATTATTAACATGAAACCCCCTGCCATCTCTCAATACCAAACACCCCTATTCGTATGGGCAGTTCTTATCACGGCCGTCCTTCTTCTCCTGTCCCTCCCAGTTCTTGCTGCTGGAATCACAATACTCCTTACAGATCGAAACCTAAACACCTCTTTCTTTGACCCTGCAGGAGGGGGAGACCCAATTCTTTACCAACATCT
>gi|381282195|gb|JQ060519.1| Moolgarda sp. JDD-2011b isolate 221 cytochrome oxidase subunit I (COI) gene, partial cds; mitochondrial
TTCTTATCCGAGCAGAACTAAGCCAACCTGGCGCTCTCCTAGGGGACGACCAGATTTATAATGTAATCGTAACTGCTCACGCCTTCGTGATGATTTTCTTTATAGTAATGCCAATCATGATCGGAGGGTTCGGGAATTGACTCGTCCCTTTAATGATCGGTGCACCTGACATAGCATTCCCTCGAATAAATAACATGAGCTTTTGACTGCTTCCCCCATCATTCCTCCTTCTCTTAGCGTCATCGGCAGTTGAAGCAGGGGCTGGAACAGGGTGAACTGTCTACCCACCGCTCGCTAGCAATTTAGCACACGCCGGAGCATCCGTTGACTTAACCATTTTCTCCCTTCATCTGGCAGGTGTCTCCTCAATTTTAGGTGCCATTAATTTTATTACAACTATTATTAACATGAAACCCCCTGCAATCTCTCAATACCAAACGCCCCTCTTCGTATGGGCAGTTCTTATCACGGCCGTCCTTCTTCTCCTGTCCCTTCCAGTTCTTGCTGCTGGCATCACGATACTCCTGACGGATCGAAACCTAAACACCTCTTTCTTTGACCCTGCAGGAGGGGGAGACCCAATTCTTTACCAACACCT
>gi|381282197|gb|JQ060520.1| Moolgarda sp. JDD-2011b isolate 222 cytochrome oxidase subunit I (COI) gene, partial cds; mitochondrial
TTCTTATCCGAGCAGAACTAAGCCAACCTGGCGCTCTCCTAGGGGACGACCAGATTTATAATGTAATCGTAACTGCTCACGCCTTCGTGATGATTTTCTTTATAGTAATGCCAATCATGATTGGAGGGTTCGGGAATTGACTCGTCCCTTTAATGATTGGTGCACCTGACATAGCATTCCCTCGAATAAATAACATGAGCTTTTGACTGCTTCCCCCATCATTCCTCCTTCTCTTAGCGTCATCGGCAGTTGAAGCAGGGGCTGGAACAGGATGAACTGTCTACCCACCGCTCGCTAGCAATTTAGCACACGCCGGAGCATCCGTTGACTTAACCATCTTCTCCCTTCATCTGGCAGGTGTCTCCTCAATTTTAGGTGCCATTAATTTTATTACAACTATTATTAACATGAAACCCCCTGCAATCTCTCAATACCAAACGCCCCTCTTCGTATGGGCAGTTCTTATCACGGCCGTCCTTCTTCTCCTGTCCCTTCCAGTTCTTGCTGCTGGCATCACGATACTCCTGACAGATCGAAACCTAAACACCTCTTTCTTTGACCCTGCAGGAGGGGGAGACCCAATTCTTTATCAACACCT
>gi|381282199|gb|JQ060521.1| Valamugil robustus isolate 255 cytochrome oxidase subunit I (COI) gene, partial cds; mitochondrial
TTCTTATCCGAGCAGAACTAAGCCAACCTGGCACCCTTCTAGGGGATGACCAGATTTATAATGTAATTGTAACGGCCCATGCTTTCGTAATAATTTTCTTTATAGTAATACCAATCATGATCGGAGGGTTTGGAAACTGACTAGTCCCTTTAATAATTGGTGCACCCGACATAGCATTCCCTCGAATGAACAACATAAGCTTCTGGCTTCTCCCCCCTTCATTCCTTCTACTCCTAGCATCCTCTGCAGTAGAGGCCGGGGCTGGAACAGGGTGGACTGTTTATCCACCTCTCGCCAGCAACCTAGCACACGCCGGAGCATCCGTCGACCTGACCATCTTCTCCCTTCACCTAGCAGGTGTATCATCAATTTTAGGCGCCATCAACTTTATTACAACTATTATTAATATAAAACCCCCTGCAATCTCTCAGTATCAAACTCCCCTCTTTGTATGAGCAGTTCTCATTACAGCCGTACTTCTCCTTCTGTCCCTACCAGTCCTTGCTGCTGGCATCACTATGCTCCTAACAGACCGGAACCTAAACACCTCCTTCTTTGACCCTGCAGGAGGAGGAGATCCAATTCTTTACCAACATCT
>gi|381282201|gb|JQ060522.1| Moolgarda sp. JDD-2011a isolate 215 cytochrome oxidase subunit I (COI) gene, partial cds; mitochondrial
TTCTCATCCGAGCAGAACTAAGCCAGCCTGGCGCTCTCCTGGGAGACGACCAGATTTATAATGTAATCGTAACTGCTCACGCCTTCGTGATAATCTTCTTTATAGTAATGCCAATCATGATTGGAGGGTTCGGGAATTGACTTATCCCCCTAATGATCGGCGCCCCAGACATAGCCTTCCCCCGAATAAATAACATGAGTTTTTGACTGCTTCCCCCTTCCTTCCTCCTTCTCTTAGCGTCATCGGCAGTTGAAGCAGGGGCCGGGACAGGATGAACTGTCTACCCGCCTCTCGCCAGCAACTTGGCACACGCCGGAGCATCCGTCGACTTAACCATCTTCTCCCTCCATCTGGCAGGTGTCTCCTCAATCTTAGGTGCTATTAATTTTATTACCACTATTATTAACATGAAACCCCCTGCCATCTCTCAATACCAAACTCCCCTATTCGTATGGGCAGTGCTTATCACGGCCGTCCTGCTTCTTCTGTCCCTCCCAGTTCTTGCTGCTGGAATCACAATACTCCTAACAGATCGAAACCTAAACACCTCTTTCTTTGACCCTGCAGGAGGGGGAGACCCAATTCTTTACCAACATCT
>gi|381282203|gb|JQ060523.1| Mugil bananensis isolate 286 cytochrome oxidase subunit I (COI) gene, partial cds; mitochondrial
TACTAATCCGAGCCGAATTAAGCCAACCKGGCGCTCTTCTAGGAGACGACCAGATTTATAATGTAGTTGTTACAGCTCATGCCTTTGTAATAATCTTTTTTATAGTAATACCAATTATGATTGGGGGCTTTGGAAACTGACTCATCCCCTTAATACTTGGTGCACCTGACATAGCATTCCCTCGAATAAATAACATAAGCTTCTGACTTCTTCCCCCCTCATTCCTCCTCCTCTTAGCATCTTCAGCAGTAGAAGCCGGGGCGGGTACAGGATGAACTGTTTACCCACCACTAGCCGGCAACTTAGCCCATGCCGGAGCATCCGTTGATCTCACCATCTTCTCCCTCCATCTTGCGGGTGTCTCCTCAATTTTAGGTGCTATCAACTTTATTACGACAATTATTAACATGAAACCTCCAGCCATCTCCCAGTATCAAACGCCCCTCTTCGTCTGAGCTGTCTTAATTACCGCCGTCCTTCTCCTTCTGTCACTTCCAGTCCTAGCCGCTGGTATTACTATGCTCCTAACAGATCGTAACCTAAATACTTCCTTCTTCGACCCTGCAGGAGGGGGAGACCCAATTCTATACCAACACTT
>gi|381282205|gb|JQ060524.1| Mugil bananensis isolate 289 cytochrome oxidase subunit I (COI) gene, partial cds; mitochondrial
TACTAATCCGAGCCGAATTAAGCCAACCTGGCGCTCTTCTAGGAGACGACCAGATTTATAATGTAGTTGTTACAGCTCATGCCTTTGTAATAATCTTTTTTATAGTAATACCAATTATGATTGGGGGCTTTGGAAACTGACTCATCCCCTTAATACTTGGTGCACCTGACATAGCATTCCCTCGAATAAATAACATAAGCTTCTGACTTCTTCCCCCCTCATTCCTCCTCCTCTTAGCATCTTCAGCAGTAGAAGCCGGGGCGGGTACAGGATGAACTGTTTACCCACCACTAGCCGGCAACTTAGCCCATGCCGGAGCATCCGTTGATCTCACCATCTTCTCCCTCCATCTTGCGGGTGTCTCCTCAATTTTAGGTGCTATCAACTTTATTACGACAATTATTAACATGAAACCTCCAGCCATCTCCCAGTATCAAACGCCCCTCTTCGTCTGAGCTGTCTTAATTACCGCCGTCCTTCTCCTTCTGTCACTTCCAGTCCTAGCCGCTGGTATTACTATGCTCCTAACAGATCGTAACCTAAATACTTCCTTCTTCGACCCTGCAGGAGGGGGAGACCCAATTCTTTACCAACACTTATTCTGATTCTTCGGTCACCCAGAGGTCTACATTCTCATCCTCCCCGGCTTCGGAATAATCTCACACATTGTCGCATACTATGCAGGCAAAAAAGAACCTTTTGGTTACATGGGTATGGTTTGAGCTATGATGGCTATTGGCCTTTTAGGCTTTATTGTCTGAGCCCACCACATGTTTACAGTCGGCATGGACGTTGACACTCGTGCCTACTTCACTTCCGCTACAATGATTATTGCCATTCCTACAGGTGTTAAAGTCTTTAGCTGATTAGCAACACTTCACGGAGGCTCAATTAAATGAGAAACACCTCTTCTCTGAGCCTTAGGTTTTATCTTCCTCTTCACAGTTGGAGGATTAACCGGCATTGTCTTAGCCAACTCTCC
>gi|381282207|gb|JQ060525.1| Mugil capurrii isolate 282 cytochrome oxidase subunit I (COI) gene, partial cds; mitochondrial
TACTTATCCGAGCCGAATTAAGCCAACCTGGAGCTCTTTTAGGAGATGACCAGATTTATAATGTAATTGTTACAGCCCACGCTTTCGTAATAATCTTTTTTATAGTAATGCCAATTATGATCGGGGGCTTCGGAAACTGACTCATCCCCTTAATGCTGGGGGCACCCGATATGGCATTCCCACGAATGAATAACATAAGCTTTTGACTTCTCCCTCCCTCATTCCTTCTCCTCCTAGCATCCTCAGCAGTAGAGGCCGGAGCAGGAACAGGATGAACTGTTTACCCACCACTAGCCGGTAACTTAGCCCATGCCGGAGCATCTGTTGACCTTACCATCTTCTCCCTTCACCTTGCAGGTGTTTCCTCAATCCTAGGTGCTATTAACTTTATTACAACAATTATTAACATGAAACCTCCAGCTATCTCCCAGTACCAAACACCTCTCTTCGTTTGAGCTGTTCTAATTACTGCCGTTCTCCTCCTCCTTTCACTTCCAGTATTAGCCGCTGGCATTACTATGCTATTAACAGACCGTAACCTAAACACCTCCTTCTTCGACCCTGCTGGAGGAGGGGATCCAATTCTGTACCAACACCT
>gi|381282209|gb|JQ060526.1| Mugil capurrii isolate 283 cytochrome oxidase subunit I (COI) gene, partial cds; mitochondrial
TACTTATCCGAGCCGAATTAAGCCAACCTGGAGCTCTTTTAGGAGATGACCAGATTTATAATGTAATTGTTACAGCCCACGCTTTCGTAATAATCTTTTTTATAGTAATGCCAATTATGATCGGGGGCTTCGGAAACTGACTCATCCCCTTAATGCTGGGGGCACCCGATATGGCATTCCCACGAATGAATAACATAAGCTTTTGACTTCTCCCTCCCTCATTCCTTCTCCTCCTAGCATCCTCAGCAGTAGAGGCCGGAGCAGGAACAGGATGAACTGTTTACCCACCACTAGCCGGTAACTTAGCCCATGCCGGAGCATCTGTTGACCTTACCATCTTCTCCCTTCACCTTGCAGGTGTTTCCTCAATCCTAGGTGCTATTAACTTTATTACAACAATTATTAACATGAAACCTCCAGCTATCTCCCAGTACCAAACACCTCTCTTCGTTTGAGCTGTTCTAATTACTGCCGTTCTCCTCCTCCTTTCACTTCCAGTATTAGCCGCTGGCATTACTATGCTATTAACAGACCGTAACCTAAACACCTCCTTCTTCGACCCTGCTGGAGGAGGGGATCCAATTCTGTACCAACACCT
>gi|381282211|gb|JQ060527.1| Mugil capurrii isolate 285 cytochrome oxidase subunit I (COI) gene, partial cds; mitochondrial
TACTTATCCGAGCCGAATTAAGCCAACCTGGAGCTCTTTTAGGAGATGACCAGATTTATAATGTAATTGTTACAGCCCACGCTTTCGTAATAATCTTTTTTATAGTAATGCCAATTATGATCGGGGGCTTCGGAAACTGACTCATCCCCTTAATGCTGGGGGCACCCGATATGGCATTCCCACGAATGAATAACATAAGCTTTTGACTTCTCCCTCCCTCATTCCTTCTCCTCCTAGCATCCTCAGCAGTAGAGGCCGGAGCAGGAACAGGATGAACTGTTTACCCACCACTAGCCGGTAACTTAGCCCATGCCGGAGCATCTGTTGACCTTACCATCTTCTCCCTTCACCTTGCAGGTGTTTCCTCAATCCTAGGTGCTATTAACTTTATTACAACAATTATTAACATGAAACCTCCAGCTATCTCCCAGTACCAAACACCTCTCTTCGTTTGAGCTGTTCTAATTACTGCCGTTCTCCTCCTCCTTTCACTTCCAGTATTAGCCGCTGGCATTACCATGCTATTAACAGACCGTAACCTAAACACCTCCTTCTTCGACCCTGCTGGAGGAGGGGATCCAATTCTGTACCAACACCT
>gi|381282213|gb|JQ060528.1| Mugil cephalus isolate 308 cytochrome oxidase subunit I (COI) gene, partial cds; mitochondrial
TACTTATCCGAGCTGAACTAAGTCAACCTGGCGCTCTTCTAGGAGACGACCAGATTTATAATGTAATCGTTACAGCGCATGCTTTTGTAATAATCTTTTTTATAGTAATACCAATTATGATCGGGGGCTTCGGAAATTGACTAGTTCCCCTAATAATTGGGGCACCTGACATAGCTTTTCCCCGAATAAATAATATGAGCTTCTGACTTCTTCCTCCATCATTCCTTCTCCTTCTAGCCTCTTCGGGAGTAGAAGCTGGGGCAGGGACAGGATGAACTGTTTATCCCCCATTAGCCAGCAACCTGGCTCACGCCGGAGCATCTGTTGACCTCACTATTTTCTCCCTCCACCTTGCAGGTGTTTCCTCAATTTTAGGTGCTATTAACTTTATTACAACAATCATCAATATGAAACCCCCAGCTACTTCTCAATATCAGACACCCCTTTTCGTATGAGCTGTCCTAATTACCGCTGTACTCCTTCTTTTATCATTACCAGTCTTAGCTGCTGGCATTACCATACTCCTAACAGATCGAAACCTAAATACTTCCTTCTTCGACCCTGCAGGGGGAGGGGACCCAATTCTGTATCAACACCT
>gi|381282215|gb|JQ060529.1| Mugil cephalus isolate 314 cytochrome oxidase subunit I (COI) gene, partial cds; mitochondrial
TACTTATCCGAGCTGAACTAAGTCAGCCTGGCGCTCTTCTAGGAGACGACCAGATTTATAATGTAATCGTTACAGCGCATGCTTTTGTAATAATCTTTTTTATAGTAATACCAATTATGATCGGGGGCTTTGGAAATTGACTAATTCCCCTAATAATTGGGGCACCTGACATAGCTTTTCCCCGAATAAATAATATGAGCTTCTGACTTCTTCCTCCATCATTCCTTCTCCTTCTAGCTTCTTCGGGAGTAGAAGCTGGGGCAGGAACAGGATGGACTGTTTATCCCCCATTAGCCAGCAACCTGGCTCACGCCGGAGCGTCTGTTGACCTTACCATTTTCTCCCTCCACCTTGCAGGTGTTTCCTCAATTTTAGGCGCTATTAACTTTATTACAACAATCATCAATATGAAACCTCCAGCTACTTCTCAATATCAAACACCCCTTTTCGTGTGAGCTGTCCTAATTACCGCTGTACTCCTTCTTTTATCACTACCAGTCTTAGCTGCTGGCATTACCATGCTCCTAACAGATCGAAACCTAAATACTTCCTTCTTCGACCCTGCAGGGGGAGGGGACCCAATTCTGTACCAACACCT
>gi|381282217|gb|JQ060530.1| Mugil cephalus isolate 315 cytochrome oxidase subunit I (COI) gene, partial cds; mitochondrial
TACTTATCCGAGCTGAACTAAGTCAGCCTGGCGCTCTTCTAGGAGACGACCAGATTTATAATGTAATCGTTACAGCGCATGCTTTTGTAATAATCTTTTTTATAGTAATACCAATTATGATCGGGGGCTTCGGAAATTGACTAGTTCCCCTAATAATTGGGGCACCTGACATAGCTTTTCCCCGAATAAATAATATGAGCTTCTGACTTCTTCCTCCATCATTCCTTCTCCTTCTAGCCTCTTCGGGAGTAGAAGCTGGGGCAGGGACAGGATGAACTGTTTATCCCCCATTAGCCAGCAACCTGGCTCACGCCGGAGCATCTGTTGACCTCACTATTTTCTCCCTCCACCTTGCAGGTGTTTCCTCAATTTTAGGTGCTATTAACTTTATTACAACAATCATCAATATGAAACCCCCAGCTACTTCTCAATATCAGACACCCCTTTTCGTATGAGCTGTCCTAATTACCGCTGTACTCCTTCTTTTATCATTACCAGTCTTAGCTGCTGGCATTACCATACTCCTAACAGATCGAAACCTAAATACTTCCTTCTTCGACCCTGCAGGGGGAGGGGACCCAATTCTGTATCAACACCT
>gi|381282219|gb|JQ060531.1| Mugil cephalus isolate 316 cytochrome oxidase subunit I (COI) gene, partial cds; mitochondrial
TACTTATCCGAGCTGAACTAAGTCAACCTGGCGCTCTTCTAGGAGACGACCAGATTTATAATGTAATCGTTACAGCGCATGCTTTTGTAATAATCTTTTTTATAGTAATACCAATTATGATCGGGGGCTTCGGAAATTGACTAGTTCCCCTAATAATTGGGGCACCTGACATAGCTTTTCCCCGAATAAATAATATGAGCTTCTGACTTCTTCCTCCATCATTCCTTCTCCTTCTAGCCTCTTCGGGAGTAGAAGCTGGGGCAGGGACAGGATGAACTGTTTATCCCCCATTAGCCAGCAACCTGGCTCACGCCGGAGCATCTGTTGACCTCACTATTTTCTCCCTCCACCTTGCAGGTGTTTCCTCAATTTTAGGTGCTATTAACTTTATTACAACAATCATCAATATGAAACCCCCAGCTACTTCTCAATATCAGACACCCCTTTTCGTATGAGCTGTCCTAATTACCGCTGTACTCCTTCTTTTATCATTACCAGTCTTAGCTGCTGGCATTACCATACTCCTAACAGATCGAAACCTAAATACTTCCTTCTTCGACCCTGCAGGGGGAGGGGACCCAATTCTGTATCAACACCT
>gi|381282221|gb|JQ060532.1| Mugil cephalus isolate 319 cytochrome oxidase subunit I (COI) gene, partial cds; mitochondrial
TACTTATCCGAGCTGAACTAAGTCAACCCGGCGCTCTTCTAGGAGACGACCAGATTTATAATGTAATCGTTACAGCGCATGCTTTTGTAATAATCTTTTTTATAGTAATACCAATTATGATCGGGGGCTTTGGAAATTGACTAATTCCCCTAATAATTGGGGCACCTGACATAGCTTTTCCCCGAATAAATAATATGAGCTTCTGACTTCTTCCTCCATCATTCCTTCTCCTTCTAGCTTCTTCGGGAGTAGAAGCTGGGGCAGGAACAGGATGGACTGTTTATCCCCCATTAGCCAGCAACCTGGCTCACGCCGGAGCGTCTGTTGACCTTACCATTTTCTCCCTCCACCTTGCAGGTGTTTCCTCAATTTTAGGCGCTATTAACTTTATTACAACAATCATCAATATGAAACCTCCAGCTACTTCTCAATATCAAACACCCCTTTTCGTGTGAGCTGTCCTAATTACCGCTGTACTCCTTCTTTTATCACTACCAGTCTTAGCTGCTGGCATTACCATGCTCCTAACAGATCGAAACCTAAATACTTCCTTCTTCGACCCTGCAGGGGGAGGGGACCCAATTCTGTACCAACACCTGTTCTGATTCTTTGGCCACCCAGAAGTCTACATTCTTATCCTTCCTGGCTTCGGGATGATCTCGCATATTGTTGCATACTACTCAGGTAAAAAAGAACCCTTCGGTTATATGGGCATGGTATGAGCTATGATGGCCATTGGCCTCTTAGGCTTTATTGTCTGAGCCCATCACATGTTCACAGTAGGGATGGATGTAGATACTCGTGCCTATTTCACCTCTGCCACAATAATTATCGCCATTCCCACAGGTGTGAAAGTCTTCAGCTGATTGGCAACACTTCACGGAGGATCAATTAAATGAGAAACCCCTCTTCTCTGGGCCCTAGGCTTTATTTTCCTCTTCACAGTCGGAGGATTAACAGGGATCGTCCTAGCCAACTCTTCCCTGGACATCGTCCTACATGATACATACTACGTAGTAGCCCACTTCCACTACGTCCTTTCCATGGGTGCTGTTTTCGCTATTATGGGAGGCTTTGTGCACTGATTCCCTCTATTTTCCGGTTACACCCTTCATAAAACATGAACAAAAATCCACTTTGGGGTAATATTTGTTGGGGTTAATTTAACCTTCTTCCCACAACACTTCCTAGGGTTAGCAGGTATACCTCGACGATACTCTGACTACCCTGACGCCTACACCCTTTGAAATTCTATCTCCTCCATAGGCTCCCTAGTCTCCTTGGTAGCTGTAATCTTATTCCTGTTCATTATCTGAGAAGCCTTTGTCGCTAAACGAGAAATCCGAGCAGTTGAATTAACCTCTACAAATGTAGAATGACTCCACGGATGCCCTCCCCCCTACCA
>gi|381282223|gb|JQ060533.1| Mugil cephalus isolate 321 cytochrome oxidase subunit I (COI) gene, partial cds; mitochondrial
TACTTATCCGAGCTGAACTAAGTCAACCCGGCGCTCTTCTAGGAGACGACCAGATTTATAATGTAATCGTTACAGCGCATGCTTTTGTAATAATCTTTTTTATAGTAATACCAATTATGATCGGGGGCTTTGGAAATTGACTAATTCCCCTAATAATTGGGGCACCTGACATAGCTTTTCCCCGAATAAATAATATGAGCTTCTGACTTCTTCCTCCATCATTCCTTCTCCTTCTAGCTTCTTCGGGAGTAGAAGCTGGGGCAGGAACAGGATGGACTGTTTATCCCCCATTAGCCAGCAACCTGGCTCACGCCGGAGCGTCTGTTGACCTTACCATTTTCTCCCTCCACCTTGCAGGTGTTTCCTCAATTTTAGGCGCTATTAACTTTATTACAACAATCATCAATATGAAACCTCCAGCTACTTCTCAATATCAAACACCCCTTTTCGTGTGAGCTGTCCTAATTACCGCTGTACTCCTTCTTTTATCACTACCAGTCTTAGCTGCTGGCATTACCATGCTCCTAACAGATCGAAACCTAAATACTTCCTTCTTCGACCCTGCAGGGGGAGGGGACCCAATTCTGTACCAACACCT
>gi|381282225|gb|JQ060534.1| Mugil cephalus isolate 322 cytochrome oxidase subunit I (COI) gene, partial cds; mitochondrial
TACTTATCCGAGCTGAACTAAGTCAACCCGGCGCTCTTCTAGGAGACGACCAGATTTATAATGTAATCGTTACAGCGCATGCTTTTGTAATAATCTTTTTTATAGTAATACCAATTATGATCGGGGGCTTTGGAAATTGACTAATTCCCCTAATAATTGGGGCACCTGACATAGCTTTTCCCCGAATAAATAATATGAGCTTCTGACTTCTTCCTCCATCATTCCTTCTCCTTCTAGCTTCTTCGGGAGTAGAAGCTGGGGCAGGAACAGGATGGACTGTTTATCCCCCATTAGCCAGCAACCTGGCTCACGCCGGAGCGTCTGTTGACCTTACCATTTTCTCCCTCCACCTTGCAGGTGTTTCCTCAATTTTAGGCGCTATTAACTTTATTACAACAATCATCAATATGAAACCTCCAGCTACTTCTCAATATCAAACACCCCTTTTCGTGTGAGCTGTCCTAATTACCGCTGTACTCCTTCTTTTATCACTACCAGTCTTAGCTGCTGGCATTACCATGCTCCTAACAGATCGAAACCTAAATACTTCCTTCTTCGACCCTGCAGGGGGAGGGGACCCAATTCTGTACCAACACCT
>gi|381282227|gb|JQ060535.1| Mugil cephalus isolate 325b cytochrome oxidase subunit I (COI) gene, partial cds; mitochondrial
TACTTATCCGAGCTGAACTAAGTCAACCTGGCGCTCTTCTAGGAGACGACCAGATTTATAATGTAATCGTTACAGCGCATGCTTTTGTAATAATCTTTTTTATAGTAATACCAATTATGATCGGGGGCTTCGGAAATTGACTAGTTCCCCTAATAATTGGGGCACCTGACATAGCTTTTCCCCGAATAAATAATATGAGCTTCTGACTTCTTCCTCCATCATTCCTTCTCCTTCTAGCCTCTTCGGGAGTAGAAGCTGGGGCAGGGACAGGATGAACTGTTTATCCCCCATTAGCCAGCAACCTGGCTCACGCCGGAGCATCTGTTGACCTCACTATTTTCTCCCTCCACCTTGCAGGTGTTTCCTCAATTTTAGGTGCTATTAACTTTATTACAACAATCATCAATATGAAACCCCCAGCTACTTCTCAATATCAAACACCCCTTTTCGTATGAGCTGTCCTAATTACCGCTGTACTCCTTCTTTTATCATTACCAGTCTTAGCTGCTGGCATTACCATACTCCTAACAGATCGAAACCTAAATACTTCCTTCTTCGACCCTGCAGGGGGAGGGGACCCAATTCTGTATCAACACCT
>gi|381282229|gb|JQ060536.1| Mugil cephalus isolate 325c cytochrome oxidase subunit I (COI) gene, partial cds; mitochondrial
TACTTATCCGAGCTGAACTAAGTCAACCCGGCGCTCTTCTAGGAGACGACCAGATTTATAATGTAATCGTTACAGCGCATGCTTTTGTAATAATCTTTTTTATAGTAATACCAATTATGATCGGGGGCTTTGGAAATTGACTAATTCCCCTAATAATTGGGGCACCTGACATAGCTTTTCCCCGAATAAATAATATGAGCTTCTGACTTCTTCCTCCATCATTCCTTCTCCTTCTAGCTTCTTCGGGAGTAGAAGCTGGGGCAGGAACAGGATGGACTGTTTATCCCCCATTAGCCAGCAACCTGGCTCACGCCGGAGCGTCTGTTGACCTTACCATTTTCTCCCTCCACCTTGCAGGTGTTTCCTCAATTTTAGGCGCTATTAACTTTATTACAACAATCATCAATATGAAACCTCCAGCTACTTCTCAATATCAAACACCCCTTTTCGTGTGAGCTGTCCTAATTACCGCTGTACTCCTTCTTTTATCACTACCAGTCTTAGCTGCTGGCATTACCATGCTCCTAACAGATCGAAACCTAAATACTTCCTTCTTCGACCCTGCAGGGGGAGGGGACCCAATTCTGTACCAACACCT
>gi|381282231|gb|JQ060537.1| Mugil cephalus isolate 326 cytochrome oxidase subunit I (COI) gene, partial cds; mitochondrial
TACTTATCCGAGCTGAACTAAGTCAACCTGGCGCTCTTCTAGGAGACGACCAGATTTATAATGTAATCGTTACAGCGCATGCTTTTGTAATAATCTTTTTTATAGTAATACCAATTATGATCGGGGGCTTCGGAAATTGACTAGTTCCCCTAATAATTGGGGCACCTGACATAGCTTTTCCCCGAATAAATAATATGAGCTTCTGACTTCTTCCTCCATCATTCCTTCTCCTTCTAGCCTCTTCGGGAGTAGAAGCTGGGGCAGGGACAGGATGAACTGTTTATCCCCCATTAGCCAGCAACCTGGCTCACGCCGGAGCATCTGTTGACCTCACTATTTTCTCCCTCCACCTTGCAGGTGTTTCCTCAATTTTAGGTGCTATTAACTTTATTACAACAATCATCAATATGAAACCCCCAGCTACTTCTCAATATCAGACACCCCTTTTCGTATGAGCTGTCCTAATTACCGCTGTACTCCTTCTTTTATCATTACCAGTCTTAGCTGCTGGCATTACCATACTCCTAACAGATCGAAACCTAAATACTTCCTTCTTCGACCCTGCAGGGGGAGGGGACCCAATTCTGTATCAACACCT
>gi|381282233|gb|JQ060538.1| Mugil cephalus isolate 327 cytochrome oxidase subunit I (COI) gene, partial cds; mitochondrial
TACTTATCCGAGCTGAACTAAGTCAACCTGGCGCTCTTCTAGGAGACGACCAGATTTATAATGTAATCGTTACAGCGCATGCTTTTGTAATAATCTTTTTTATAGTAATACCAATTATGATCGGGGGCTTCGGAAATTGACTAGTTCCCCTAATAATTGGGGCACCTGACATAGCTTTTCCCCGAATAAATAATATGAGCTTCTGACTTCTTCCTCCATCATTCCTTCTCCTTCTAGCCTCTTCGGGAGTAGAAGCTGGGGCAGGGACAGGATGAACTGTTTATCCCCCATTAGCCAGCAACCTGGCTCACGCCGGAGCATCTGTTGACCTCACTATTTTCTCCCTCCACCTTGCAGGTGTTTCCTCAATTTTAGGTGCTATTAACTTTATTACAACAATCATCAATATGAAACCCCCAGCTACTTCTCAATATCAGACACCCCTTTTCGTATGAGCTGTCCTAATTACCGCTGTACTCCTTCTTTTATCATTACCAGTCTTAGCTGCTGGCATTACCATACTCCTAACAGATCGAAACCTAAATACTTCCTTCTTCGACCCTGCAGGGGGAGGGGACCCAATTCTGTATCAACACCT
>gi|381282235|gb|JQ060539.1| Mugil cephalus isolate 328 cytochrome oxidase subunit I (COI) gene, partial cds; mitochondrial
TACTTATCCGAGCTGAACTAAGTCAACCCGGCGCTCTTCTAGGAGACGACCAGATTTATAATGTAATCGTTACAGCACATGCTTTTGTAATAATCTTTTTTATAGTAATACCAATTATGATCGGGGGCTTCGGAAATTGACTAGTTCCCCTAATAATTGGGGCACCTGACATAGCTTTTCCCCGAATAAATAATATGAGCTTCTGACTTCTTCCTCCATCATTCCTCCTCCTTCTAGCTTCTTCGGGAGTAGAAGCTGGGGCAGGGACAGGATGGACTGTTTATCCCCCATTAGCCAGCAACCTGGCTCACGCCGGAGCGTCTGTTGACCTCACCATTTTCTCCCTCCACCTTGCAGGTGTTTCCTCAATTTTAGGCGCTATTAACTTTATTACAACAATCATCAATATGAAACCTCCAGCTACTTCTCAATATCAAACACCCCTTTTCGTATGAGCTGTCCTAATTACCGCTGTACTCCTTCTTTTATCATTACCAGTCTTAGCTGCTGGCATTACAATACTCCTAACAGATCGAAACCTAAATACTTCTTTCTTCGACCCTGCAGGGGGAGGGGACCCAATTCTGTATCAACACCT
>gi|381282237|gb|JQ060540.1| Mugil cephalus isolate 329 cytochrome oxidase subunit I (COI) gene, partial cds; mitochondrial
TACTTATCCGAGCTGAACTAAGTCAACCCGGCGCTCTTCTAGGAGACGACCAGATTTACAATGTAATCGTTACAGCGCATGCTTTTGTAATAATCTTTTTTATAGTAATACCAATTATGATTGGGGGCTTCGGAAATTGATTAATTCCCCTAATAATTGGGGCACCTGACATAGCTTTTCCCCGAATAAATAATATAAGCTTCTGACTTCTTCCTCCATCATTCCTTCTCCTTCTAGCTTCTTCGGGAGTAGAAGCTGGGGCAGGAACAGGATGGACTGTTTATCCCCCATTAGCCAGCAACCTGGCCCACGCCGGAGCGTCTGTTGACCTCACTATTTTCTCCCTCCACCTTGCAGGTGTTTCCTCAATTCTAGGCGCTATTAACTTTATTACAACAATCATCAATATGAAACCTCCAGCTACTTCTCAATATCAGACACCCCTTTTCGTATGAGCTGTCCTAATTACCGCTGTACTTCTTCTTTTATCATTACCAGTCTTAGCTGCTGGCATTACCATACTCCTAACAGATCGAAACCTAAATACTTCCTTCTTCGACCCTGCAGGGGGAGGGGACCCAATTCTGTATCAACACCT
>gi|381282239|gb|JQ060541.1| Mugil cephalus isolate 329b cytochrome oxidase subunit I (COI) gene, partial cds; mitochondrial
TACTCATCCGAGCTGAACTAAGTCAACCCGGCGCTCTTCTAGGAGACGACCAGATTTATAATGTAATCGTTACAGCGCATGCTTTTGTAATAATCTTTTTTATAGTCATACCAATTATGATCGGGGGCTTCGGAAATTGACTAGTTCCCTTAATAATCGGGGCACCTGACATAGCTTTTCCCCGAATAAACAATATGAGCTTCTGACTTCTTCCCCCATCATTCCTACTCCTTTTAGCTTCTTCAGGAGTAGAAGCTGGAGCGGGGACAGGATGGACTGTTTATCCCCCGTTAGCTGGCAACCTGGCTCACGCCGGAGCGTCTGTTGACCTCACCATTTTCTCCCTCCACCTTGCAGGTGTTTCCTCAATTTTAGGAGCTATTAACTTTATTACAACAATCATCAACATGAAACCTCCAGCTACTTCTCAATATCAGACACCCCTTTTCGTATGAGCTGTCCTAATTACCGCTGTACTCCTTCTTTTATCACTACCAGTCTTAGCTGCTGGCATTACCATACTCCTAACAGATCGAAACCTAAATACTTCCTTCTTCGATCCTGCAGGAGGAGGGGACCCAATTCTGTATCAACACCT
>gi|381282241|gb|JQ060542.1| Mugil cephalus isolate 333 cytochrome oxidase subunit I (COI) gene, partial cds; mitochondrial
TACTTATCCGAGCTGAACTAAGTCAACCTGGCGCTCTTCTAGGAGACGACCAGATTTATAATGTAATCGTTACAGCGCATGCTTTTGTAATAATCTTTTTTATAGTAATACCAATTATGATCGGGGGCTTCGGAAATTGACTAGTTCCCCTAATAATTGGGGCACCTGACATAGCTTTTCCCCGAATAAATAATATGAGCTTCTGACTTCTTCCTCCATCATTCCTTCTCCTTCTAGCCTCTTCGGGAGTAGAAGCTGGGGCAGGGACAGGATGAACTGTTTATCCCCCATTAGCCAGCAACCTGGCTCACGCCGGAGCATCTGTTGACCTCACTATTTTCTCCCTCCACCTTGCAGGTGTTTCCTCAATTTTAGGTGCTATTAACTTTATTACAACAATCATCAATATGAAACCCCCAGCTACTTCTCAATATCAGACACCCCTTTTCGTATGAGCTGTCCTAATTACCGCTGTACTCCTTCTTTTATCATTACCAGTCTTAGCTGCTGGCATTACCATACTCCTAACAGATCGAAACCTAAATACTTCCTTCTTCGACCCTGCAGGGGGAGGGGACCCAATTCTGTATCAACACCT
>gi|381282243|gb|JQ060543.1| Mugil cephalus isolate 337 cytochrome oxidase subunit I (COI) gene, partial cds; mitochondrial
TACTTATCCGAGCTGAATTAAGTCAACCTGGCGCTCTTCTAGGAGACGACCAGATTTATAATGTAATCGTTACAGCGCATGCTTTTGTAATAATCTTTTTTATAGTAATACCAATTATGATCGGGGGCTTCGGAAATTGACTAGTTCCCCTAATAATTGGGGCACCTGACATAGCTTTTCCCCGAATAAATAATATGAGCTTCTGACTTCTTCCTCCATCATTCCTTCTCCTTCTAGCCTCTTCGGGAGTAGAAGCTGGGGCAGGGACAGGATGAACTGTTTATCCCCCATTAGCCAGCAACCTGGCTCACGCCGGAGCATCTGTTGACCTCACTATTTTCTCCCTCCACCTTGCAGGTGTTTCCTCAATTTTAGGTGCTATTAACTTTATTACAACAATTATCAATATGAAACCCCCAGCTACTTCTCAATATCARACACCCCTTTTCGTATGAGCTGTCCTAATTACCGCTGTACTCCTTCTTTTATCATTACCAGTCTTAGCTGCTGGCATTACCATACTCCTAACAGATCGAAACCTAAATACTTCCTTCTTCGACCCTGCAGGGGGAGGGGACCCAATTCTGTATCAACACCT
>gi|381282245|gb|JQ060544.1| Mugil cephalus isolate 341 cytochrome oxidase subunit I (COI) gene, partial cds; mitochondrial
TACTCATCCGAGCTGAACTAAGTCAACCCGGCGCTCTTCTAGGAGACGACCAGATTTATAATGTAATCGTTACAGCGCATGCTTTTGTAATAATCTTTTTTATAGTAATACCAATTATGATCGGGGGCTTCGGAAATTGACTAATTCCCCTAATAATCGGAGCACCTGACATAGCTTTCCCCCGAATAAATAATATGAGCTTCTGACTTCTTCCTCCATCATTCCTTCTCCTTCTAGCTTCTTCGGGAGTAGAAGCTGGGGCAGGGACAGGATGGACTGTTTATCCACCATTAGCCAGCAACCTGGCTCACGCCGGAGCGTCTGTTGACCTCACCATTTTCTCCCTCCACCTTGCAGGTGTTTCCTCAATTTTAGGCGCTATTAACTTTATTACAACAATCATCAATATGAAACCTCCAGCTACTTCTCAATATCAAACACCCCTTTTCGTATGAGCTGTCCTAATTACCGCTGTGCTCCTTCTTTTATCATTACCAGTCTTAGCTGCTGGCATTACCATACTCCTAACAGATCGAAACCTAAATACTTCCTTCTTCGACCCTGCAGGGGGAGGGGACCCAATTCTGTATCAACACCT
>gi|381282247|gb|JQ060545.1| Mugil cephalus isolate 342 cytochrome oxidase subunit I (COI) gene, partial cds; mitochondrial
TACTCATCCGAGCTGAACTAAGTCAACCCGGCGCTCTTCTAGGAGACGACCAGATTTATAATGTAATCGTTACAGCGCATGCTTTTGTAATAATCTTTTTTATAGTAATACCAATTATGATCGGGGGCTTCGGAAATTGACTAATTCCCCTAATAATCGGAGCACCTGACATAGCTTTCCCCCGAATAAATAATATGAGCTTCTGACTTCTTCCTCCATCATTCCTTCTCCTTCTAGCTTCTTCGGGAGTAGAAGCTGGGGCAGGGACAGGATGGACTGTTTATCCACCATTAGCCAGCAACCTGGCTCACGCCGGAGCGTCTGTTGACCTCACCATTTTCTCCCTCCACCTTGCAGGTGTTTCCTCAATTTTAGGCGCTATTAACTTTATTACAACAATCATCAATATGAAACCTCCAGCCACTTCTCAATATCAAACACCCCTTTTCGTATGAGCTGTCCTAATTACCGCTGTGCTCCTTCTTTTATCATTACCAGTCTTAGCTGCTGGCATTACCATACTCCTAACAGATCGAAACCTAAATACTTCCTTCTTCGACCCTGCAGGGGGAGGGGACCCAATTCTGTATCAACACCT
>gi|381282249|gb|JQ060546.1| Mugil cephalus isolate 343 cytochrome oxidase subunit I (COI) gene, partial cds; mitochondrial
TACTCATCCGAACTGAACTAAGTCAACCCGGCGCTCTTCTAGGAGACGACCAGATTTATAATGTAATCGTTACAGCGCATGCTTTTGTAATAATCTTTTTTATAGTAATACCAATTATGATCGGGGGCTTCGGAAATTGACTAATTCCCCTAATAATCGGAGCACCTGACATAGCTTTCCCCCGAATAAATAATATGAGCTTCTGACTTCTTCCTCCATCATTCCTTCTCCTTCTAGCTTCTTCGGGAGTAGAAGCTGGGGCAGGGACAGGATGGACTGTTTATCCACCATTAGCCAGCAACCTGGCTCACGCCGGAGCGTCTGTTGACCTCACCATTTTCTCCCTCCACCTTGCAGGTGTTTCCTCAATTTTAGGCGCTATTAACTTTATTACAACAATCATCAATATGAAACCTCCAGCTACTTCTCAATATCAAACACCCCTTTTCGTATGAGCTGTCCTAATTACCGCTGTGCTCCTTCTTTTATCATTACCAGTCTTAGCTGCTGGCATTACCATACTCCTAACAGATCGAAACCTAAATACTTCCTTCTTCGACCCTGCAGGGGGAGGGGACCCAATTCTGTATCAACACCT
>gi|381282251|gb|JQ060547.1| Mugil cephalus isolate 343b cytochrome oxidase subunit I (COI) gene, partial cds; mitochondrial
TACTCATCCGAACTGAACTAAGTCAACCCGGCGCTCTTCTAGGAGACGACCAGATTTATAATGTAATCGTTACAGCGCATGCTTTTGTAATAATCTTTTTTATAGTAATACCAATTATGATCGGGGGCTTCGGAAATTGACTAATTCCCCTAATAATCGGAGCACCTGACATAGCTTTCCCCCGAATAAATAATATGAGCTTCTGACTTCTTCCTCCATCATTCCTTCTCCTTCTAGCTTCTTCGGGAGTAGAAGCTGGAGCAGGGACAGGATGGACTGTTTATCCACCATTAGCCAGCAACCTGGCTCACGCCGGAGCGTCTGTTGACCTCACCATTTTCTCCCTCCACCTTGCAGGTGTTTCCTCAATTTTAGGCGCTATTAACTTTATTACAACAATCATCAATATGAAACCTCCAGCTACTTCTCAATATCAAACACCCCTTTTCGTATGAGCTGTCCTAATTACCGCTGTGCTCCTTCTTTTATCATTACCAGTCTTAGCTGCTGGCATTACCATACTCCTAACAGATCGAAACCTAAATACTTCCTTCTTCGACCCTGCAGGGGGAGGGGACCCAATTCTGTATCAACACCT
>gi|381282253|gb|JQ060548.1| Mugil cephalus isolate 343c cytochrome oxidase subunit I (COI) gene, partial cds; mitochondrial
TACTCATCCGAACTGAACTAAGTCAACCCGGCGCTCTTCTAGGAGACGACCAGATTTATAATGTAATCGTTACAGCGCATGCTTTTGTAATAATCTTTTTTATAGTAATACCAATTATGATCGGGGGCTTCGGAAATTGACTAATTCCCCTAATAATCGGAGCACCTGACATAGCTTTCCCCCGAATAAATAATATGAGCTTCTGACTTCTTCCTCCATCATTCCTTCTCCTTCTAGCTTCTTCGGGAGTAGAAGCTGGGGCAGGGACAGGATGGACTGTTTATCCACCATTAGCCAGCAACCTGGCTCACGCCGGAGCGTCTGTTGACCTCACCATTTTCTCCCTCCACCTTGCAGGTGTTTCCTCAATTTTAGGCGCTATTAACTTTATTACAACAATCATCAATATGAAACCTCCAGCCACTTCTCAATATCAAACACCCCTTTTCGTATGAGCTGTCCTAATTACCGCTGTGCTCCTTCTTTTATCATTACCAGTCTTAGCTGCTGGCATTACCATACTCCTAACAGATCGAAACCTAAATACTTCCTTCTTCGACCCTGCAGGGGGAGGGGACCCAATTCTGTATCAACACCT
>gi|381282255|gb|JQ060549.1| Mugil cephalus isolate 350 cytochrome oxidase subunit I (COI) gene, partial cds; mitochondrial
TACTTATCCGAGCTGAACTAAGTCAACCCGGCGCTCTTCTAGGAGACGACCAGATTTATAATGTAATCGTTACAGCACATGCTTTTGTAATAATCTTTTTTATAGTAATACCAATTATGATTGGGGGCTTCGGAAATTGACTAATTCCCCTAATAATTGGGGCGCCCGACATAGCTTTTCCCCGAATAAATAATATGAGCTTCTGACTTCTTCCTCCATCATTCCTTCTCCTTCTAGCTTCTTCGGGAGTAGAAGCTGGGGCAGGGACAGGATGGACTGTTTATCCCCCATTAGCCAGCAACCTGGCTCACGCCGGAGCGTCTGTTGACCTCACCATTTTCTCCCTCCACCTTGCGGGTGTTTCCTCAATTTTAGGTGCTATTAACTTTATTACAACAATCATCAATATGAAACCCCCAGCTACTTCTCAATATCAGACACCCCTTTTCGTATGAGCTGTCCTAATTACCGCTGTACTCCTTCTTTTATCATTACCAGTCTTAGCTGCCGGCATTACCATACTCCTAACAGATCGAAACCTAAATACTTCCTTCTTCGACCCTGCAGGGGGAGGGGACCCAATTCTGTATCAACACCT
>gi|381282257|gb|JQ060550.1| Mugil cephalus isolate 351 cytochrome oxidase subunit I (COI) gene, partial cds; mitochondrial
TACTTATCCGAGCTGAACTAAGTCAACCCGGCGCTCTTCTAGGAGACGACCAGATTTATAATGTAATCGTTACAGCACATGCTTTTGTAATAATCTTTTTTATAGTAATACCAATTATGATTGGGGGCTTCGGAAATTGACTAATTCCCCTAATAATTGGGGCGCCCGACATAGCTTTTCCCCGAATAAATAATATGAGCTTCTGACTTCTTCCTCCATCATTCCTTCTCCTTCTAGCTTCTTCGGGAGTAGAAGCTGGGGCAGGGACAGGATGGACTGTTTATCCCCCATTAGCCAGCAACCTGGCTCACGCCGGAGCGTCTGTTGACCTCACCATTTTCTCCCTCCACCTTGCGGGTGTTTCCTCAATTTTAGGTGCTATTAACTTTATTACAACAATCATCAATATGAAACCCCCAGCTACTTCTCAATATCAGACACCCCTTTTCGTATGAGCTGTCCTAATTACCGCTGTACTCCTTCTTTTATCATTACCAGTCTTAGCTGCCGGCATTACCATACTCCTAACAGATCGAAACCTAAATACTTCCTTCTTCGACCCTGCAGGGGGAGGGGACCCAATTCTGTATCAACACCT
>gi|381282259|gb|JQ060551.1| Mugil cephalus isolate 354b cytochrome oxidase subunit I (COI) gene, partial cds; mitochondrial
TACTTATCCGAGCTGAACTAAGTCAACCCGGCGCTCTTCTAGGAGACGACCAGATTTATAATGTAATCGTTACAGCACATGCTTTTGTAATAATCTTTTTTATAGTAATACCAATTATGATTGGGGGCTTCGGAAATTGACTAATTCCCCTAATAATTGGGGCGCCCGACATAGCTTTTCCCCGAATAAATAATATGAGCTTCTGACTTCTTCCTCCATCATTCCTTCTCCTTCTAGCTTCTTCGGGAGTAGAAGCTGGGGCAGGGACAGGATGGACTGTTTATCCCCCATTAGCCAGCAACCTGGCTCACGCCGGAGCGTCTGTTGACCTCACCATTTTCTCCCTCCACCTTGCGGGTGTTTCCTCAATTTTAGGTGCTATTAACTTTATTACAACAATCATCAATATGAAACCCCCAGCTACTTCTCAATATCAGACACCCCTTTTCGTATGAGCTGTCCTAATTACCGCTGTACTCCTTCTTTTATCATTACCAGTCTTAGCTGCCGGCATTACCATACTCCTAACAGATCGAAACCTAAATACTTCCTTCTTCGACCCTGCAGGGGGAGGGGACCCAATTCTGTATCAACACCT
>gi|381282261|gb|JQ060552.1| Mugil cephalus isolate 357 cytochrome oxidase subunit I (COI) gene, partial cds; mitochondrial
TACTTATCCGAGCTGAACTAAGTCAACCCGGCGCTCTTCTAGGAGACGACCAGATTTATAATGTAATCGTTACAGCACATGCTTTTGTAATAATCTTTTTTATAGTAATACCAATTATGATCGGGGGCTTCGGAAATTGACTAGTTCCCCTAATAATTGGGGCACCTGACATAGCTTTTCCCCGAATAAATAATATGAGCTTCTGACTTCTTCCTCCATCATTCCTCCTCCTTCTAGCTTCTTCGGGAGTAGAAGCTGGGGCAGGGACAGGATGGACTGTTTATCCCCCATTAGCCAGCAACCTGGCTCACGCCGGAGCGTCTGTTGACCTCACCATTTTCTCCCTCCACCTTGCAGGTGTTTCCTCAATTTTAGGCGCTATTAACTTTATTACAACAATCATCAATATGAAACCTCCAGCTACTTCTCAATATCAAACACCCCTTTTCGTATGAGCTGTCCTAATTACCGCTGTACTCCTTCTTTTATCATTACCAGTCTTAGCTGCTGGCATTACAATACTCCTAACAGATCGAAACCTAAATACTTCTTTCTTCGACCCTGCAGGGGGAGGGGACCCAATTCTGTATCAACACCT
>gi|381282263|gb|JQ060553.1| Mugil cephalus isolate 358 cytochrome oxidase subunit I (COI) gene, partial cds; mitochondrial
TACTTATCCGAGCTGAAMTAAGTCAACCCGGCGCTCTTCTAGGAGACGACCAGATTTATAATGTAATCGTTACAGCACATGCTTTTGTAATAATCTTTTTTATAGTAATACCAATTATGATCGGGGGCTTCGGAAATTGACTAGTTCCCCTAATAATTGGGGCACCTGACATAGCTTTTCCCCGAATAAATAATATGAGCTTCTGACTTCTTCCTCCATCATTCCTTCTCCTTCTAGCTTCTTCGGGAGTAGAAGCTGGGGCAGGGACAGGATGGACTGTTTATCCCCCATTAGCCAGCAACCTGGCTCACGCCGGAGCGTCTGTTGACCTCACCATTTTCTCCCTCCACCTTGCAGGTGTTTCCTCAATTTTAGGCGCTATTAACTTTATTACAACAATCATCAATATGAAACCTCCAGCTACTTCTCAATATCAAACACCCCTTTTCGTATGAGCTGTCCTAATTACCGCTGTACTCCTTCTTTTATCATTACCAGTCTTAGCTGCTGGCATTACAATACTCCTAACAGATCGAAACCTAAATACTTCCTTCTTCGACCCTGCAGGGGGAGGGGACCCAATTCTGTATCAACACCT
>gi|381282265|gb|JQ060554.1| Mugil cephalus isolate 361 cytochrome oxidase subunit I (COI) gene, partial cds; mitochondrial
TACTTATCCGAGCTGAACTAAGTCAACCTGGCGCTCTTCTAGGAGACGACCAGATTTACAATGTAATCGTTACAGCACATGCTTTTGTAATAATCTTTTTTATAGTAATACCAATTATGATCGGGGGCTTCGGAAATTGACTAATTCCCCTAATAATTGGGGCACCTGACATAGCTTTTCCCCGAATAAATAATATGAGCTTCTGACTTCTTCCTCCATCATTCCTCCTCCTTCTAGCTTCTTCGGGAGTAGAAGCTGGGGCAGGGACAGGATGGACTGTTTATCCCCCATTAGCCAGCAACCTGGCTCACGCCGGAGCGTCTGTTGACCTCACCATTTTCTCCCTCCACCTTGCAGGTGTTTCCTCAATTTTAGGCGCTATTAACTTTATTACAACAATCATCAATATGAAACCTCCAGCTACTTCTCAATATCAGACACCTCTTTTCGTATGAGCTGTCCTAATTACCGCTGTACTCCTTCTTTTATCATTACCAGTCTTAGCTGCTGGCATTACCATACTCCTAACAGATCGAAACCTAAATACTTCCTTCTTCGACCCTGCAGGGGGAGGGGACCCAATTCTGTATCAACACCT
>gi|381282267|gb|JQ060555.1| Mugil cephalus isolate 362 cytochrome oxidase subunit I (COI) gene, partial cds; mitochondrial
TACTTATCCGAGCTGAACTAAGTCAACCCGGCGCTCTTCTAGGAGACGACCAGATTTACAATGTAATCGTTACAGCACATGCTTTTGTAATAATCTTTTTTATAGTAATACCAATTATGATCGGGGGCTTCGGAAATTGACTAATTCCCCTAATAATTGGGGCACCTGACATAGCTTTTCCCCGAATAAATAATATGAGCTTCTGACTTCTTCCTCCATCATTCCTCCTCCTTCTAGCTTCTTCGGGAGTAGAAGCTGGGGCAGGGACAGGATGGACTGTTTATCCCCCATTAGCCAGCAACCTGGCTCACGCCGGAGCGTCTGTTGACCTCACCATTTTCTCCCTCCACCTTGCAGGTGTTTCCTCAATTTTAGGCGCTATTAACTTTATTACAACAATCATCAATATGAAACCTCCAGCTACTTCTCAATATCAGACACCTCTTTTCGTATGAGCTGTCCTAATTACCGCTGTACTCCTTCTTTTATCATTACCAGTCTTAGCTGCTGGCATTACCATACTCCTAACAGATCGAAACCTAAATACTTCCTTCTTCGACCCTGCAGGGGGAGGGGACCCAATTCTGTATCAACACCT
>gi|381282269|gb|JQ060556.1| Mugil cephalus isolate 362b cytochrome oxidase subunit I (COI) gene, partial cds; mitochondrial
TACTTATCCGAGCTGAACTAAGTCAACCCGGCGCTCTTCTAGGAGACGACCAGATTTATAATGTAATCGTTACAGCGCATGCTTTTGTAATAATCTTTTTTATAGTAATACCAATTATGATCGGGGGCTTCGGAAATTGACTAGTTCCCCTAATAATTGGGGCACCTGACATAGCTTTTCCCCGAATAAATAATATGAGCTTCTGACTTCTTCCTCCATCATTCCTCCTCCTTCTAGCTTCTTCGGGAGTAGAAGCTGGGGCAGGGACAGGATGGACTGTTTATCCCCCATTAGCCAGCAACCTGGCTCACGCCGGAGCGTCTGTTGACCTCACCATTTTCTCCCTCCACCTTGCAGGTGTTTCCTCAATTTTAGGCGCTATTAACTTTATTACAACAATCATCAATATGAAACCTCCAGCTACTTCTCAATATCAGACACCCCTTTTCGTATGAGCTGTCCTAATTACCGCTGTACTCCTTCTTTTATCATTACCAGTCTTAGCTGCTGGCATTACCATGCTCCTAACAGATCGAAACCTAAATACTTCCTTCTTCGACCCTGCAGGGGGAGGGGACCCAATTCTGTATCAACACCT
>gi|381282271|gb|JQ060557.1| Mugil cephalus isolate 365 cytochrome oxidase subunit I (COI) gene, partial cds; mitochondrial
TACTTATCCGAGCTGAACTAAGTCAACCCGGCGCTCTTCTAGGAGACGACCAGATTTATAATGTAATCGTTACAGCACATGCTTTTGTAATAATCTTTTTTATAGTAATACCAATTATGATCGGGGGCTTCGGAAATTGACTAGTTCCCCTAATAATTGGGGCACCTGACATAGCTTTTCCCCGAATAAATAATATGAGCTTCTGACTTCTTCCTCCATCATTCCTTCTCCTTCTAGCTTCTTCGGGAGTAGAAGCTGGGGCAGGGACAGGATGGACTGTTTATCCCCCATTAGCCAGCAACCTGGCTCACGCCGGAGCGTCTGTTGACCTCACCATTTTCTCCCTCCACCTTGCAGGTGTTTCCTCAATTTTAGGCGCTATTAACTTTATTACAACAATCATCAATATGAAACCTCCAGCTACTTCTCAATATCAAACACCCCTTTTCGTATGAGCTGTCCTAATTACCGCTGTACTCCTTCTTTTATCATTACCAGTCTTAGCTGCTGGCATTACAATACTCCTAACAGATCGAAACCTAAATACTTCCTTCTTCGACCCTGCAGGGGGAGGGGACCCAATTCTGTATCAACACCT
>gi|381282273|gb|JQ060558.1| Mugil cephalus isolate 367 cytochrome oxidase subunit I (COI) gene, partial cds; mitochondrial
TACATATCCGAGCTGAACTAAGTCAACCCGGCGCTCTTCTAGGAGACGACCAGATTTATAATGTAATCGTTACAGCGCATGCTTTTGTAATAATCTTTTTTATAGTAATACCAATTATGATTGGGGGCTTCGGAAATTGACTAGTTCCCCTAATAATTGGGGCACCTGACATAGCTTTTCCCCGAATAAATAATATGAGCTTCTGACTTCTTCCTCCATCATTCCTCCTCCTTCTAGCTTCTTCGGGAGTAGAAGCTGGGGCAGGGACAGGATGGACTGTTTATCCCCCATTAGCCAGCAACCTGGCTCACGCCGGAGCGTCTGTTGACCTCACCATTTTCTCCCTCCACCTTGCAGGTGTTTCCTCAATTTTAGGCGCTATTAACTTTATTACAACAATCATCAATATGAAACCTCCAGCTACTTCTCAATATCAGACACCCCTTTTCGTATGAGCTGTCCTAATTACCGCTGTACTCCTTCTTTTATCATTACCAGTCTTAGCTGCTGGCATTACCATGCTCCTAACAGATCGAAACCTAAATACTTCCTTCTTCGACCCTGCAGGGGGAGGGGACCCAATTCTGTATCAACACCT
>gi|381282275|gb|JQ060559.1| Mugil cephalus isolate 368 cytochrome oxidase subunit I (COI) gene, partial cds; mitochondrial
TACTTATCCGAGCTGAACTAAGTCAACCCGGCGCTCTTCTAGGAGACGACCAGATTTATAATGTAATCGTTACAGCACATGCTTTTGTAATAATCTTTTTTATAGTAATACCAATTATGATCGGGGGCTTCGGAAATTGACTGGTTCCCCTAATAATTGGGGCACCTGATATAGCTTTTCCCCGAATAAATAATATAAGCTTCTGACTTCTTCCCCCATCATTCCTGCTCCTTCTAGCTTCTTCCGGAGTAGAAGCTGGGGCAGGAACAGGATGAACTGTTTATCCCCCATTAGCCAGCAACCTGGCTCACGCCGGAGCGTCTGTTGACCTCACCATTTTCTCCCTCCACCTTGCAGGTGTTTCCTCAATTCTAGGCGCTATTAACTTTATTACAACAATCATCAATATGAAACCTCCAGCTACTTCTCAATATCAAACACCCCTTTTCGTATGAGCTGTCCTAATTACCGCTGTACTCCTTCTTTTATCATTACCAGTTTTAGCTGCTGGCATTACCATACTCCTAACAGATCGAAACCTAAACACTTCTTTCTTCGACCCTGCAGGAGGAGGGGACCCAATTCTGTATCAACACCT
>gi|381282277|gb|JQ060560.1| Mugil cephalus isolate 371b cytochrome oxidase subunit I (COI) gene, partial cds; mitochondrial
TACTCATCCGAGCTGAACTAAGTCAACCCGGCGCTCTTCTAGGAGACGACCAGATTTACAATGTAATCGTTACAGCGCATGCTTTCGTAATAATCTTTTTTATAGTAATACCAATTATGATTGGGGGCTTCGGAAATTGACTAGTGCCCTTAATAATCGGGGCACCTGATATAGCTTTTCCCCGAATAAATAATATAAGCTTCTGACTTCTTCCTCCATCATTCCTTCTCCTTCTAGCTTCTTCGGGAGTAGAAGCTGGGGCAGGGACAGGATGAACTGTTTATCCCCCATTAGCCAGCAACCTGGCTCACGCCGGAGCGTCTGTTGACCTCACAATTTTCTCCCTCCACCTTGCAGGTGTTTCCTCAATTTTAGGCGCTATTAACTTTATTACAACAATTATCAATATAAAACCTCCAGCTACTTCTCAATATCAAACACCTCTTTTCGTATGAGCTGTCCTAATTACCGCTGTACTCCTTCTTTTATCATTACCAGTCTTAGCTGCCGGCATTACCATACTCTTAACAGATCGAAACCTGAATACTTCCTTCTTCGACCCTGCAGGAGGAGGGGACCCAATTCTGTATCAACACCT
>gi|381282279|gb|JQ060561.1| Mugil cephalus isolate 371c cytochrome oxidase subunit I (COI) gene, partial cds; mitochondrial
TACTCATCCGAGCTGAACTAAGTCAACCCGGCGCTCTTCTAGGAGACGACCAGATTTACAATGTAATCGTTACAGCGCATGCTTTCGTAATAATCTTTTTTATAGTAATACCAATTATGATTGGGGGCTTCGGAAATTGACTAGTGCCCTTAATAATCGGGGCACCTGATATAGCTTTTCCCCGAATAAATAATATAAGCTTCTGACTTCTTCCTCCATCATTCCTTCTCCTTCTAGCTTCTTCGGGAGTAGAAGCTGGGGCAGGGACAGGATGAACTGTTTATCCCCCATTAGCCAGCAACCTGGCTCACGCCGGAGCGTCTGTTGACCTCACAATTTTCTCCCTCCACCTTGCAGGTGTTTCCTCAATTTTAGGCGCTATTAACTTTATTACAACAATTATCAATATAAAACCTCCAGCTACTTCTCAATATCAAACACCTCTTTTCGTATGAGCTGTCCTAATTACCGCTGTACTCCTTCTTTTATCATTACCAGTCTTAGCTGCCGGCATTACCATACTCTTAACAGATCGAAACCTGAATACTTCCTTCTTCGACCCTGCAGGAGGAGGAGACCCAATTCTGTATCAACACCT
>gi|381282281|gb|JQ060562.1| Mugil cephalus isolate 373 cytochrome oxidase subunit I (COI) gene, partial cds; mitochondrial
TACTCATCCGAGCTGAACTAAGTCAACCTGGCGCTCTTCTAGGAGACGACCAGATTTATAATGTAATCGTTACAGCACATGCTTTTGTAATAATCTTTTTTATAGTAATACCAATCATGATCGGGGGCTTCGGAAATTGACTAGTTCCCCTAATAATCGGAGCACCTGATATAGCTTTTCCCCGAATAAATAACATAAGCTTCTGACTTCTTCCCCCATCATTCCTTCTCCTTCTAGCTTCTTCGGGAGTAGAGGCTGGGGCAGGAACAGGATGGACTGTTTATCCCCCATTAGCCAGCAACCTGGCCCACGCCGGAGCGTCTGTTGACCTCACCATTTTCTCCCTCCACCTTGCGGGGGTTTCCTCAATTTTAGGCGCTATTAACTTTATTACAACAATCATCAATATAAAACCTCCAGCTACTTCTCAATATCAGACACCCCTTTTCGTGTGAGCTGTCCTAATTACCGCTGTACTCCTTCTTTTATCATTACCAGTCTTAGCTGCTGGCATTACTATACTCCTGACAGATCGAAACCTAAATACTTCCTTCTTTGACCCTGCAGGGGGAGGGGACCCAATTCTGTATCAACACCT
>gi|381282283|gb|JQ060563.1| Mugil cephalus isolate 375 cytochrome oxidase subunit I (COI) gene, partial cds; mitochondrial
TACTCATCCGAGCTGAACTAAGTCAACCTGGCGCTCTTCTAGGAGACGACCAGATTTATAATGTAATCGTTACAGCGCATGCTTTTGTAATAATCTTTTTTATAGTAATACCAATTATGATCGGGGGCTTCGGAAATTGACTAATTCCCCTAATAATTGGGGCACCTGACATAGCTTTTCCCCGAATAAATAATATGAGCTTCTGGCTCCTTCCTCCATCATTCCTTCTCCTTCTAGCTTCTTCGGGAGTAGAAGCTGGAGCAGGGACAGGATGGACTGTTTACCCCCCATTAGCCAGCAACCTGGCCCACGCCGGAGCATCTGTTGACCTCACCATTTTCTCCCTCCACCTTGCAGGTGTTTCCTCAATTTTAGGCGCTATTAACTTTATTACAACAATCATCAATATGAAACCTCCAGCTACTTCTCAATATCAGACACCCCTTTTCGTATGAGCTGTCCTAATTACCGCTGTACTCCTTCTTTTATCATTACCAGTATTAGCTGCTGGTATTACCATACTCCTAACAGATCGAAACCTAAATACTTCCTTCTTCGACCCTGCAGGGGGAGGGGACCCAATTCTGTATCAACACCT
>gi|381282285|gb|JQ060564.1| Mugil cephalus isolate 376 cytochrome oxidase subunit I (COI) gene, partial cds; mitochondrial
TACTCATCCGAGCTGAACTAAGTCAACCTGGCGCTCTTCTAGGAGACGACCAGATTTATAATGTAATCGTTACAGCGCATGCTTTTGTAATAATCTTTTTTATAGTAATACCAATTATGATCGGGGGCTTCGGAAATTGACTAATTCCCCTAATAATTGGGGCACCTGACATAGCTTTTCCCCGAATAAATAATATGAGCTTCTGGCTCCTTCCTCCATCATTCCTTCTCCTTCTAGCTTCTTCGGGAGTAGAAGCTGGAGCAGGGACAGGATGGACTGTTTATCCCCCATTAGCCAGCAACCTGGCCCACGCCGGAGCATCTGTTGACCTCACCATTTTCTCCCTCCACCTTGCAGGTGTTTCCTCAATTTTAGGCGCTATTAACTTTATTACAACAATCATCAATATGAAACCTCCAGCTACTTCTCAATATCAGACACCCCTTTTCGTATGAGCTGTCCTAATTACCGCTGTACTCCTTCTTTTATCATTACCAGTATTAGCTGCTGGTATTACCATACTCCTAACAGATCGAAACCTAAATACTTCCTTCTTCGACCCTGCAGGGGGAGGGGACCCAATTCTGTATCAACACCT
>gi|381282287|gb|JQ060565.1| Mugil cephalus isolate 377 cytochrome oxidase subunit I (COI) gene, partial cds; mitochondrial
TACTTATCCGAGCTGAACTAAGTCAACCCGGCGCTCTTCTAGGAGACGACCAGATTTATAATGTAATCGTTACAGCGCAGGCTTTTGTAATAATCTTTTTTATAGTAATACCAATTATGATCGGGGGCTTCGGAAATTGACTAGTTCCCCTAATAATTGGGGCACCTGACATAGCTTTTCCCCGAATAAATAATATGAGCTTCTGACTTCTTCCTCCATCATTCCTCCTCCTTCTAGCTTCTTCGGGAGTAGAAGCTGGGGCAGGGACAGGATGGACTGTTTATCCCCCATTAGCCAGCAACCTGGCTCACGCCGGAGCGTCTGTTGACCTCACCATTTTCTCCCTCCACCTTGAAGGTGTTTCCTCAATTTTAGGCGCTATTAACTTTATTACAACAATCATCAATATGAAACCTCCAGCTACTTCTCAATATCAAACACCCCTTTTCGTATGAGCTGTCCTAATTACCGCTGTACTCCTTCTTTTATCATTACCAGTCTTACCTGCTGGCATTACCATGCTCCTAACAGATCGAAACCTAAATACTTCCTTCTTCGACCCTGCAGGGGGAGGGGACCCAATTCTGTATCAACACCT
>gi|381282289|gb|JQ060566.1| Mugil cephalus isolate 380 cytochrome oxidase subunit I (COI) gene, partial cds; mitochondrial
TACTCATCCGAGCTGAACTAAGTCAACCCGGCGCTCTTCTAGGAGACGACCAGATTTATAATGTAATCGTTACAGCGCATGCTTTTGTAATAATCTTTTTTATAGTCATACCAATTATGATCGGGGGCTTCGGAAATTGACTAGTTCCCTTAATAATCGGGGCACCTGACATAGCTTTTCCCCGAATAAACAATATAAGCTTCTGACTTCTTCCCCCATCATTCCTACTCCTTTTAGCTTCTTCAGGAGTAGAAGCTGGAGCGGGGACAGGATGGACTGTTTATCCCCCGTTAGCTGGCAACCTGGCTCACGCCGGAGCGTCTGTTGACCTCACCATTTTCTCCCTCCACCTTGCAGGTGTTTCCTCAATTTTAGGAGCTATTAACTTTATTACAACAATCATCAACATGAAACCTCCAGCTACTTCTCAATATCAGACACCCCTTTTCGTATGAGCTGTCCTAATTACCGCTGTACTCCTTCTTTTATCACTACCAGTCTTAGCTGCTGGCATTACCATACTCCTAACAGATCGAAACCTAAATACTTCCTTCTTCGATCCTGCAGGAGGAGGGGACCCAATTCTGTATCAACACCT
>gi|381282291|gb|JQ060567.1| Mugil cephalus isolate 381 cytochrome oxidase subunit I (COI) gene, partial cds; mitochondrial
TACTCATCCGAGCTGAACTAAGTCAACCCGGCGCTCTTCTAGGAGACGACCAGATTTATAATGTAATCGTTACAGCGCATGCTTTTGTAATAATCTTTTTTATAGTCATACCAATTATGATCGGGGGCTTCGGAAATTGACTAGTTCCCTTAATAATCGGGGCACCTGACATAGCTTTTCCCCGAATAAACAATATAAGCTTCTGACTTCTTCCCCCATCATTCCTACTCCTTTTAGCTTCTTCAGGAGTAGAAGCTGGAGCGGGGACAGGATGGACTGTTTATCCCCCGTTAGCTGGCAACCTGGCTCACGCCGGAGCGTCTGTTGACCTCACCATTTTCTCCCTCCACCTTGCAGGTGTTTCCTCAATTTTAGGAGCTATTAACTTTATTACAACAATCATCAACATGAAACCTCCAGCTACTTCTCAATATCAGACACCCCTTTTCGTATGAGCTGTCCTAATTACCGCTGTACTCCTTCTTTTATCACTACCAGTCTTAGCTGCTGGCATTACCATACTCCTAACAGATCGAAACCTAAATACTTCCTTCTTCGATCCTGCAGGAGGAGGGGACCCAATTCTGTATCAACACCT
>gi|381282293|gb|JQ060568.1| Mugil cephalus isolate 383 cytochrome oxidase subunit I (COI) gene, partial cds; mitochondrial
[truncated: 82,486,591 more chars]
