# Supplementary material for: Metabarcoding by capture using a single COI probe (MCSP) to identify and quantify fish species in ichthyoplankton swarms
Source: PLoS One. 2018 Sep 12;13(9):e0202976. doi: 10.1371/journal.pone.0202976 (PMC6135497; doi:10.1371/journal.pone.0202976)
Supplement: S3 Table — (XLSX) [file pone.0202976.s005.xlsx]

## Sheet: Feuil1
Input data to run ROC											ROC results
		MARANON-Mock				NAPO-Mock
				binary				binary
		Mock-SD	Mock-SSil	SANGER	Sanger %	Mock-SD	Mock-SSil	SANGER	Sanger %											Brut (before applying the threshold)		After applying the Threshold ROC-MaxSSS
Pseudoplatystoma corruscans	Siluriformes	0.000444614	NA	0	0	0.00265681	NA	0	0		Maranon-Mock-SSil	cut	fpr	tpr	specificity	sensitivity	SSS			True Positive	FP	Threshold value	True Positive	False Positive	False Negative	True Negative	Specificity T N / ( T N + F P ) mock sample level	sensitivity T P / ( T P + F N ) mock sample level	Specificity T N / ( T N + F P ) mock level	sensitivity T P / ( T P + F N ) mock level
Pimelodus pohli	Siluriformes	0.00133384	NA	0	0	0.0650918	NA	0	0			0.0427	1	1	0	1	1		MAR-Mock-SIL	25	3	0.4693	15	0	10	3	1	0.6	1	0.694444
Pseudoplatystoma fasciatum	Siluriformes	0.00177846	NA	0	0	0.0349813	0.376921	0	0			0.0853	1	0.92	0	0.92	0.92		NAP-Mock-SIL	11	2	0.8118	10	0	1	2	1	0.909091
Brachyplatystoma capapretum	Siluriformes	0.00400153	NA	0	0	0.00664202	NA	0	0			0.1280	0.333333	0.92	0.666667	0.92	1.58667		MAR-Mock-SD	25	27	0.0547	25	5	0	22	0.814815	1	0.880952	1
Triportheus nematurus	Characiformes	0.01156	NA	0	0	0.000442801	NA	0	0			0.1706	0.333333	0.84	0.666667	0.84	1.50667		NAP-Mock-SD	11	15	0.4428	11	0	0	15	1	1
Brachyplatystoma rousseauxii	Siluriformes	0.173844	0.255973	1	0.00378788	0.00442801	NA	0	0			0.2560	0.333333	0.76	0.666667	0.76	1.42667
Piaractus brachypomus	Characiformes	6.81416	1.02389	1	0.0681818	NA	NA	NA	0			0.2986	0.333333	0.72	0.666667	0.72	1.38667		MAR-Bulk-SIL			0.8118	7	3	15
Triportheus angulatus	Characiformes	11.2981	0.938567	1	0.0606061	0.206788	NA	0	0			0.3413	0.333333	0.64	0.666667	0.64	1.30667		NAP-Bulk-SIL			0.8118	7	2	3
Mylossoma duriventre	Characiformes	12.8734	1.10922	1	0.143939	NA	NA	0	0			0.4266	0.333333	0.6	0.666667	0.6	1.26667		MAR-Bulk-SD			0.8118	15	4	10
Potamorhina altamazonica	Characiformes	16.3671	0.895904	1	0.0568182	0.122656	NA	0	0			0.4693	0	0.6	1	0.6	1.6		NAP-Bulk-SD			0.8118	8	0	3
Schizodon fasciatus	Characiformes	22.0164	4.99147	1	0.200758	0.127527	NA	0	0			0.6826	0	0.56	1	0.56	1.56
Bergiaria westermanni	Siluriformes	NA	NA	NA	0	0.000442801	NA	0	0			0.8959	0	0.52	1	0.52	1.52
Pimelodus albicans	Siluriformes	NA	NA	NA	0	0.000885602	NA	0	0			0.9386	0	0.48	1	0.48	1.48
Pimelodus fur	Siluriformes	NA	NA	NA	0	0.0017712	NA	0	0			1.0239	0	0.44	1	0.44	1.44
Platystomatichthys sturio	Siluriformes	NA	NA	NA	0	0	NA	0	0			1.1092	0	0.4	1	0.4	1.4
Pseudoplatystoma punctifer	Siluriformes	NA	NA	NA	0	0.00797042	NA	0	0			1.1519	0	0.32	1	0.32	1.32
Zungaro jahu	Siluriformes	NA	NA	NA	0	0.0230257	0.0289939	0	0			1.5358	0	0.28	1	0.28	1.28
Danio rerio	Cypriniform	NA	NA	NA	0	0.000442801	NA	0	0			2.2184	0	0.24	1	0.24	1.24
Pimelodus cf. argenteus TPL-2014	Siluriformes	0.000889229	NA	0	0	1.32973	1.59467	1	0.0196078			4.9915	0	0.2	1	0.2	1.2
Pimelodus A-C34	Siluriformes	0.0546876	0.127986	1	0.00378788	4.38993	2.52247	1	0.0686275			5.2048	0	0.16	1	0.16	1.16
Hypophthalmus sp-C95	Siluriformes	0.327681	1.15188	1	0.00378788	1.76678	1.56567	1	0.00980392			10.9642	0	0.12	1	0.12	1.12
Pimelodus blochii	Siluriformes	0.387259	1.10922	1	0.00378788	29.2032	24.9638	1	0.284314			16.5529	0	0.08	1	0.08	1.08
Pseudoplatystoma tigrinum	Siluriformes	0.660252	10.9642	1	0.00378788	2.09046	8.26326	1	0.0196078			48.6775	0	0.04	1	0.04	1.04
Hypophthalmus sp. CGD-2016	Siluriformes	1.16311	5.20478	1	0.0189394	2.31939	3.21832	1	0.0294118			Inf	0	0	1	0	1
Brachyplatystoma filamentosum	Siluriformes	1.23514	2.21843	1	0.0265152	7.22519	3.47927	1	0.0882353
Brachyplatystoma vaillantii	Siluriformes	10.4702	48.6775	1	0.155303	38.4537	48.2749	1	0.431373		Maranon-Mock-SD	cut	fpr	tpr	specificity	sensitivity	SSS
Leiarius marmoratus	Siluriformes	NA	NA	NA	0	1.24958	0.318933	1	0.00980392			0.0004	1	1	0	1	1
Pimelodina flavipinnis	Siluriformes	NA	NA	NA	0	10.9235	4.58104	1	0.0294118			0.0009	0.888889	1	0.111111	1	1.11111
Zungaro zungaro	Siluriformes	NA	NA	NA	0	0.442801	0.81183	1	0.00980392			0.0013	0.814815	1	0.185185	1	1.18518
Leporinus agassizi	Characiformes	0.000444614	NA	0	0	NA	NA	NA	0			0.0018	0.777778	1	0.222222	1	1.22222
Pseudoplatystoma reticulatum	Siluriformes	0.000444614	NA	0	0	NA	NA	NA	0			0.0022	0.666667	1	0.333333	1	1.33333
Plagioscion squamosissimus	Perciform	0.000889229	NA	0	0	NA	NA	NA	0			0.0040	0.592593	1	0.407407	1	1.40741
Leporinus paranensis	Characiformes	0.00177846	NA	0	0	NA	NA	NA	0			0.0044	0.555556	1	0.444444	1	1.44444
Prochilodus nigricans Agassiz	Characiformes	0.00177846	NA	0	0	NA	NA	NA	0			0.0053	0.518519	1	0.481482	1	1.48148
Schizodon borellii	Characiformes	0.00222307	NA	0	0	NA	NA	NA	0			0.0062	0.481481	1	0.518518	1	1.51852
Prochilodus argenteus	Characiformes	0.00222307	NA	0	0	NA	NA	NA	0			0.0089	0.444444	1	0.555556	1	1.55556
Pellona castelnaeana	Characiformes	0.00444614	NA	0	0	NA	NA	NA	0			0.0111	0.407407	1	0.592593	1	1.59259
Schizodon vittatus	Characiformes	0.00533537	NA	0	0	NA	NA	NA	0			0.0116	0.333333	1	0.666667	1	1.66667
Semaprochilodus insignis	Characiformes	0.0062246	NA	0	0	NA	NA	NA	0			0.0160	0.296296	1	0.703704	1	1.7037
Prochilodus reticulatus	Characiformes	0.00889229	NA	0	0	NA	NA	NA	0			0.0436	0.259259	1	0.740741	1	1.74074
Leporinus macrocephalus	Characiformes	0.0111154	NA	0	0	NA	NA	NA	0			0.0516	0.222222	1	0.777778	1	1.77778
Schizodon scotorhabdotus	Characiformes	0.0111154	NA	0	0	NA	NA	NA	0			0.0547	0.185185	1	0.814815	1	1.81482
Schizodon intermedius	Characiformes	0.0160061	NA	0	0	NA	NA	NA	0			0.1032	0.185185	0.96	0.814815	0.96	1.77482
Astyanax bimaculatus	Characiformes	0.0435722	0.0853242	0	0	NA	NA	NA	0			0.1120	0.185185	0.92	0.814815	0.92	1.73481
Rhaphiodon vulpinus	Characiformes	0.0515753	NA	0	0	NA	NA	NA	0			0.1538	0.148148	0.92	0.851852	0.92	1.77185
Colossoma sp. KU 3081	Characiformes	0.112043	NA	0	0	NA	NA	NA	0			0.1738	0.148148	0.88	0.851852	0.88	1.73185
Semaprochilodus kneri	Characiformes	0.291667	NA	0	0	NA	NA	NA	0			0.2917	0.148148	0.84	0.851852	0.84	1.69185
Prochilodus rubrotaeniatus	Characiformes	0.311675	0.0853242	0	0	NA	NA	NA	0			0.3117	0.111111	0.84	0.888889	0.84	1.72889
Leporinus trifasciatus	Characiformes	0.356581	NA	0	0	NA	NA	NA	0			0.3277	0.0740741	0.84	0.925926	0.84	1.76593
Prochilodus lineatus	Characiformes	0.986599	0.426621	0	0	NA	NA	NA	0			0.3566	0.0740741	0.8	0.925926	0.8	1.72593
Leporinus trimaculatus	Characiformes	0.103151	0.0426621	1	0.00757576	NA	NA	NA	0			0.3873	0.037037	0.8	0.962963	0.8	1.76296
Pimelodus sp. C CGD-2016	Siluriformes	0.153837	0.341297	1	0.00378788	NA	NA	NA	0			0.5629	0.037037	0.76	0.962963	0.76	1.72296
Phractocephalus hemioliopterus	Siluriformes	0.562882	0.682594	1	0.00378788	NA	NA	NA	0			0.6211	0.037037	0.72	0.962963	0.72	1.68296
Anodus elongatus	Characiformes	0.621126	0.0426621	1	0.0189394	NA	NA	NA	0			0.6603	0.037037	0.68	0.962963	0.68	1.64296
Brycon melanopterus	Characiformes	0.704714	0.170648	1	0.0151515	NA	NA	NA	0			0.7047	0.037037	0.64	0.962963	0.64	1.60296
Hypophthalmus spA-289	Siluriformes	1.02795	16.5529	1	0.0227273	NA	NA	NA	0			0.9866	0.037037	0.6	0.962963	0.6	1.56296
Semaprochilodus taeniurus	Characiformes	1.05418	0.298635	1	0.0265152	NA	NA	NA	0			1.0279	0	0.6	1	0.6	1.6
Prochilodus nigricans	Characiformes	1.18401	0.469283	1	0.0530303	NA	NA	NA	0			1.0542	0	0.56	1	0.56	1.56
Mylossoma aureum	Characiformes	1.53392	0.298635	1	0.0189394	NA	NA	NA	0			1.1631	0	0.52	1	0.52	1.52
Triportheus elongatus	Characiformes	1.80736	0.127986	1	0.0151515	NA	NA	NA	0			1.1840	0	0.48	1	0.48	1.48
Psectrogaster amazonica	Characiformes	2.20084	1.53584	1	0.0378788	NA	NA	NA	0			1.2351	0	0.44	1	0.44	1.44
Potamorhina latior	Characiformes	2.95802	0.170648	1	0.0265152	NA	NA	NA	0			1.5339	0	0.4	1	0.4	1.4
Leporinus fasciatus	Characiformes	NA	NA	NA	0	NA	NA	NA	0			1.8074	0	0.36	1	0.36	1.36
Roeboides myersii	Characiformes	NA	NA	NA	0	NA	NA	NA	0			2.2008	0	0.32	1	0.32	1.32
Hydrolycus scomberoides	Characiformes	NA	NA	NA	0	NA	NA	NA	0			2.9580	0	0.28	1	0.28	1.28
Tetragonopterus argenteus	Characiformes	NA	NA	NA	0	NA	NA	NA	0			6.8142	0	0.24	1	0.24	1.24
Caenotropus labyrinthicus	Characiformes	NA	NA	NA	0	NA	NA	NA	0			10.4702	0	0.2	1	0.2	1.2
Curimata cyprinoides	Characiformes	NA	NA	NA	0	NA	NA	NA	0			11.2981	0	0.16	1	0.16	1.16
Curimatella lepidura	Characiformes	NA	NA	NA	0	NA	NA	NA	0			12.8734	0	0.12	1	0.12	1.12
Cyphocharax vanderi	Characiformes	NA	NA	NA	0	NA	NA	NA	0			16.3671	0	0.08	1	0.08	1.08
Anodus orinocensis	Characiformes	NA	NA	NA	0	NA	NA	NA	0			22.0164	0	0.04	1	0.04	1.04
Hemiodus microlepis	Characiformes	NA	NA	NA	0	NA	NA	NA	0			Inf	0	0	1	0	1
Colossoma macropomum	Characiformes	NA	NA	NA	0	NA	NA	NA	0
Pseudostegophilus nemurus	Siluriformes	NA	NA	NA	0	NA	NA	NA	0
Cetopsis candiru	Siluriformes	NA	NA	NA	0	NA	NA	NA	0
Cetopsis coecutiens	Siluriformes	NA	NA	NA	0	NA	NA	NA	0		Napo-Mock-Ssil	cut	fpr	tpr	specificity	sensitivity	SSS
Pterodoras granulosus	Siluriformes	NA	NA	NA	0	NA	NA	NA	0			0.0290	1.0	1.00000000	0.0	1.00000000	1.000000
Calophysus macropterus	Siluriformes	NA	NA	NA	0	NA	NA	NA	0			0.3189	0.5	1.00000000	0.5	1.00000000	1.500000
Sorubim lima	Siluriformes	NA	NA	NA	0	NA	NA	NA	0			0.3769	0.5	0.90909091	0.5	0.90909091	1.409091
Actinopterygii environmental sample	Actinopterygii	NA	NA	NA	0	NA	NA	NA	0			0.8118	0.0	0.90909091	1.0	0.90909091	1.909091
Plagioscion auratus	Perciform	NA	NA	NA	0	NA	NA	NA	0			1.5657	0.0	0.81818182	1.0	0.81818182	1.818182
												1.5947	0.0	0.72727273	1.0	0.72727273	1.727273
												2.5225	0.0	0.63636364	1.0	0.63636364	1.636364
												3.2183	0.0	0.54545455	1.0	0.54545455	1.545455
												3.4793	0.0	0.45454545	1.0	0.45454545	1.454545
												4.5810	0.0	0.36363636	1.0	0.36363636	1.363636
												8.2633	0.0	0.27272727	1.0	0.27272727	1.272727
												24.9638	0.0	0.18181818	1.0	0.18181818	1.181818
												48.2749	0.0	0.09090909	1.0	0.09090909	1.090909
												Inf	0.0	0.00000000	1.0	0.00000000	1.000000
											Napo-Mock-SD	cut	fpr	tpr	specificity	sensitivity	SSS
												0.0000	1.0000	1.00000000	0.0000	1.00000000	1.000000
												0.0004	0.9375	1.00000000	0.0625	1.00000000	1.062500
												0.0009	0.7500	1.00000000	0.2500	1.00000000	1.250000
												0.0018	0.6875	1.00000000	0.3125	1.00000000	1.312500
												0.0027	0.6250	1.00000000	0.3750	1.00000000	1.375000
												0.0044	0.5625	1.00000000	0.4375	1.00000000	1.437500
												0.0066	0.5000	1.00000000	0.5000	1.00000000	1.500000
												0.0080	0.4375	1.00000000	0.5625	1.00000000	1.562500
												0.0230	0.3750	1.00000000	0.6250	1.00000000	1.625000
												0.0350	0.3125	1.00000000	0.6875	1.00000000	1.687500
												0.0651	0.2500	1.00000000	0.7500	1.00000000	1.750000
												0.1227	0.1875	1.00000000	0.8125	1.00000000	1.812500
												0.1275	0.1250	1.00000000	0.8750	1.00000000	1.875000
												0.2068	0.0625	1.00000000	0.9375	1.00000000	1.937500
												0.4428	0.0000	1.00000000	1.0000	1.00000000	2.000000
												1.2496	0.0000	0.90909091	1.0000	0.90909091	1.909091
												1.3297	0.0000	0.81818182	1.0000	0.81818182	1.818182
												1.7668	0.0000	0.72727273	1.0000	0.72727273	1.727273
												2.0905	0.0000	0.63636364	1.0000	0.63636364	1.636364
												2.3194	0.0000	0.54545455	1.0000	0.54545455	1.545455
												4.3899	0.0000	0.45454545	1.0000	0.45454545	1.454545
												7.2252	0.0000	0.36363636	1.0000	0.36363636	1.363636
												10.9235	0.0000	0.27272727	1.0000	0.27272727	1.272727
												29.2032	0.0000	0.18181818	1.0000	0.18181818	1.181818
												38.4537	0.0000	0.09090909	1.0000	0.09090909	1.090909
												Inf	0.0000	0.00000000	1.0000	0.00000000	1.000000
