# Supplementary material for: Metabarcoding by capture using a single COI probe (MCSP) to identify and quantify fish species in ichthyoplankton swarms
Source: PLoS One. 2018 Sep 12;13(9):e0202976. doi: 10.1371/journal.pone.0202976 (PMC6135497; doi:10.1371/journal.pone.0202976)
Supplement: S4 Table — (XLSX) [file pone.0202976.s006.xlsx]

## Sheet: Feuil1
Sample	Sequence name	Name of the multifasta file	SANGER identification Maggia et al 2017	DRYAD DOI:	ORDER	SANGER identification (this study) via MALT	NOTE	Note
Nap-S	Nap-S_1	Nap-S.fasta	Brachyplastoma vaillantii	doi:10.5061/dryad.117tn	Siluriformes	Brachyplatystoma vaillantii
Nap-S	Nap-S_2	Nap-S.fasta	Brachyplastoma vaillantii	doi:10.5061/dryad.117tn	Siluriformes	Brachyplatystoma vaillantii
Nap-S	Nap-S_3	Nap-S.fasta	Pimelodus blochii	doi:10.5061/dryad.117tn	Siluriformes	Pimelodus cf. argenteus TPL-2014
Nap-S	Nap-S_4	Nap-S.fasta	Zungaro zungaro	doi:10.5061/dryad.117tn	Siluriformes	Zungaro zungaro
Nap-S	Nap-S_5	Nap-S.fasta	Brachyplastoma filamentosum	doi:10.5061/dryad.117tn	Siluriformes	Brachyplatystoma filamentosum
Nap-S	Nap-S_6	Nap-S.fasta	Brachyplastoma vaillantii	doi:10.5061/dryad.117tn	Siluriformes	Brachyplatystoma vaillantii
Nap-S	Nap-S_7	Nap-S.fasta	Brachyplastoma filamentosum	doi:10.5061/dryad.117tn	Siluriformes	Brachyplatystoma filamentosum
Nap-S	Nap-S_8	Nap-S.fasta	Brachyplastoma vaillantii	doi:10.5061/dryad.117tn	Siluriformes	Brachyplatystoma vaillantii
Nap-S	Nap-S_9	Nap-S.fasta	Pimelodus blochii	doi:10.5061/dryad.117tn	Siluriformes	Pimelodus blochii
Nap-S	Nap-S_10	Nap-S.fasta	Pimelodus blochii	doi:10.5061/dryad.117tn	Siluriformes	Pimelodus blochii
Nap-S	Nap-S_11	Nap-S.fasta	Hypophthalmus sp	doi:10.5061/dryad.117tn	Siluriformes	Hypophthalmus sp. CGD-2016
Nap-S	Nap-S_12	Nap-S.fasta	Pimelodus blochii	doi:10.5061/dryad.117tn	Siluriformes	Pimelodus A-C34
Nap-S	Nap-S_13	Nap-S.fasta	Pimelodus blochii	doi:10.5061/dryad.117tn	Siluriformes	Pimelodus blochii
Nap-S	Nap-S_14	Nap-S.fasta	Brachyplastoma vaillantii	doi:10.5061/dryad.117tn	Siluriformes	Brachyplatystoma vaillantii
Nap-S	Nap-S_15	Nap-S.fasta	Brachyplastoma vaillantii	doi:10.5061/dryad.117tn	Siluriformes	Brachyplatystoma vaillantii
Nap-S	Nap-S_16	Nap-S.fasta	Brachyplastoma filamentosum	doi:10.5061/dryad.117tn	Siluriformes	Brachyplatystoma filamentosum
Nap-S	Nap-S_17	Nap-S.fasta	Brachyplastoma vaillantii	doi:10.5061/dryad.117tn	Siluriformes	Brachyplatystoma vaillantii
Nap-S	Nap-S_18	Nap-S.fasta	Pimelodus blochii	doi:10.5061/dryad.117tn	Siluriformes	Pimelodus blochii
Nap-S	Nap-S_19	Nap-S.fasta	Pimelodus blochii	doi:10.5061/dryad.117tn	Siluriformes	Pimelodus blochii
Nap-S	Nap-S_20	Nap-S.fasta	Brachyplastoma vaillantii	doi:10.5061/dryad.117tn	Siluriformes	Brachyplatystoma vaillantii
Nap-S	Nap-S_21	Nap-S.fasta	Pimelodus blochii	doi:10.5061/dryad.117tn	Siluriformes	Pimelodus blochii
Nap-S	Nap-S_22	Nap-S.fasta	Pimelodus blochii	doi:10.5061/dryad.117tn	Siluriformes	Pimelodus blochii
Nap-S	Nap-S_23	Nap-S.fasta	Pimelodus blochii	doi:10.5061/dryad.117tn	Siluriformes	Pimelodus blochii
Nap-S	Nap-S_24	Nap-S.fasta	Pimelodus blochii	doi:10.5061/dryad.117tn	Siluriformes	Pimelodus blochii
Nap-S	Nap-S_25	Nap-S.fasta	Brachyplastoma vaillantii	doi:10.5061/dryad.117tn	Siluriformes	Brachyplatystoma vaillantii
Nap-S	Nap-S_26	Nap-S.fasta	Pimelodus blochii	doi:10.5061/dryad.117tn	Siluriformes	Pimelodus A-C34
Nap-S	Nap-S_27	Nap-S.fasta	Pimelodus blochii	doi:10.5061/dryad.117tn	Siluriformes	Pimelodus blochii
Nap-S	Nap-S_28	Nap-S.fasta	Pimelodus blochii	doi:10.5061/dryad.117tn	Siluriformes	Pimelodus blochii
Nap-S	Nap-S_29	Nap-S.fasta	Pimelodus blochii	doi:10.5061/dryad.117tn	Siluriformes	Pimelodus A-C34
Nap-S	Nap-S_30	Nap-S.fasta	Brachyplastoma vaillantii	doi:10.5061/dryad.117tn	Siluriformes	Brachyplatystoma vaillantii
Nap-S	Nap-S_31	Nap-S.fasta	Brachyplastoma vaillantii	doi:10.5061/dryad.117tn	Siluriformes	Brachyplatystoma vaillantii
Nap-S	Nap-S_32	Nap-S.fasta	Hypophthalmus sp	doi:10.5061/dryad.117tn	Siluriformes	Hypophthalmus sp. CGD-2016
Nap-S	Nap-S_33	Nap-S.fasta	Pimelodus blochii	doi:10.5061/dryad.117tn	Siluriformes	Pimelodus blochii
Nap-S	Nap-S_34	Nap-S.fasta	Pimelodus spA-C34	doi:10.5061/dryad.117tn	Siluriformes	Pimelodus A-C34
Nap-S	Nap-S_35	Nap-S.fasta	Brachyplastoma filamentosum	doi:10.5061/dryad.117tn	Siluriformes	Brachyplatystoma filamentosum
Nap-S	Nap-S_36	Nap-S.fasta	Pimelodus blochii	doi:10.5061/dryad.117tn	Siluriformes	Pimelodus blochii
Nap-S	Nap-S_37	Nap-S.fasta	Leiarus marmoratus	doi:10.5061/dryad.117tn	Siluriformes	Leiarius marmoratus
Nap-S	Nap-S_38	Nap-S.fasta	Pimelodus blochii	doi:10.5061/dryad.117tn	Siluriformes	Pimelodus blochii
Nap-S	Nap-S_39	Nap-S.fasta	Brachyplastoma vaillantii	doi:10.5061/dryad.117tn	Siluriformes	Brachyplatystoma vaillantii
Nap-S	Nap-S_40	Nap-S.fasta	Pimelodus blochii	doi:10.5061/dryad.117tn	Siluriformes	Pimelodus blochii
Nap-S	Nap-S_41	Nap-S.fasta	Brachyplastoma vaillantii	doi:10.5061/dryad.117tn	Siluriformes	Brachyplatystoma vaillantii
Nap-S	Nap-S_42	Nap-S.fasta	Brachyplastoma filamentosum	doi:10.5061/dryad.117tn	Siluriformes	Brachyplatystoma filamentosum
Nap-S	Nap-S_43	Nap-S.fasta	Brachyplastoma filamentosum	doi:10.5061/dryad.117tn	Siluriformes	Brachyplatystoma filamentosum
Nap-S	Nap-S_44	Nap-S.fasta	Brachyplastoma vaillantii	doi:10.5061/dryad.117tn	Siluriformes	Brachyplatystoma vaillantii
Nap-S	Nap-S_45	Nap-S.fasta	Brachyplastoma vaillantii	doi:10.5061/dryad.117tn	Siluriformes	Brachyplatystoma vaillantii
Nap-S	Nap-S_46	Nap-S.fasta	Brachyplastoma vaillantii	doi:10.5061/dryad.117tn	Siluriformes	Brachyplatystoma vaillantii
Nap-S	Nap-S_47	Nap-S.fasta	Brachyplastoma vaillantii	doi:10.5061/dryad.117tn	Siluriformes	Brachyplatystoma vaillantii
Nap-S	Nap-S_48	Nap-S.fasta	Brachyplastoma vaillantii	doi:10.5061/dryad.117tn	Siluriformes	Brachyplatystoma vaillantii
Nap-S	Nap-S_49	Nap-S.fasta	Pseudoplatystoma tigrinum	doi:10.5061/dryad.117tn	Siluriformes	Pseudoplatystoma tigrinum
Nap-S	Nap-S_50	Nap-S.fasta	Brachyplastoma vaillantii	doi:10.5061/dryad.117tn	Siluriformes	Brachyplatystoma vaillantii
Nap-S	Nap-S_51	Nap-S.fasta	Brachyplastoma vaillantii	doi:10.5061/dryad.117tn	Siluriformes	Brachyplatystoma vaillantii
Nap-S	Nap-S_52	Nap-S.fasta	Brachyplastoma filamentosum	doi:10.5061/dryad.117tn	Siluriformes	Brachyplatystoma filamentosum
Nap-S	Nap-S_53	Nap-S.fasta	Brachyplastoma vaillantii	doi:10.5061/dryad.117tn	Siluriformes	Brachyplatystoma vaillantii
Nap-S	Nap-S_54	Nap-S.fasta	Pimelodina flavipinnis	doi:10.5061/dryad.117tn	Siluriformes	Pimelodina flavipinnis
Nap-S	Nap-S_55	Nap-S.fasta	Pimelodus blochii	doi:10.5061/dryad.117tn	Siluriformes	Pimelodus blochii
Nap-S	Nap-S_56	Nap-S.fasta	Brachyplastoma vaillantii	doi:10.5061/dryad.117tn	Siluriformes	Brachyplatystoma vaillantii
Nap-S	Nap-S_57	Nap-S.fasta	Brachyplastoma vaillantii	doi:10.5061/dryad.117tn	Siluriformes	Brachyplatystoma vaillantii
Nap-S	Nap-S_58	Nap-S.fasta	Pimelodus blochii	doi:10.5061/dryad.117tn	Siluriformes	Pimelodus blochii
Nap-S	Nap-S_59	Nap-S.fasta	Brachyplastoma vaillantii	doi:10.5061/dryad.117tn	Siluriformes	Brachyplatystoma vaillantii
Nap-S	Nap-S_60	Nap-S.fasta	Brachyplastoma vaillantii	doi:10.5061/dryad.117tn	Siluriformes	Brachyplatystoma vaillantii
Nap-S	Nap-S_61	Nap-S.fasta	Pimelodus blochii	doi:10.5061/dryad.117tn	Siluriformes	Pimelodus A-C34
Nap-S	Nap-S_62	Nap-S.fasta	Hypophthalmus sp	doi:10.5061/dryad.117tn	Siluriformes	Hypophthalmus sp. CGD-2016
Nap-S	Nap-S_63	Nap-S.fasta	Pimelodus blochii	doi:10.5061/dryad.117tn	Siluriformes	Pimelodus blochii
Nap-S	Nap-S_64	Nap-S.fasta	Pimelodus blochii	doi:10.5061/dryad.117tn	Siluriformes	Pimelodus cf. argenteus TPL-2014
Nap-S	Nap-S_65	Nap-S.fasta	Brachyplastoma vaillantii	doi:10.5061/dryad.117tn	Siluriformes	Brachyplatystoma vaillantii
Nap-S	Nap-S_66	Nap-S.fasta	Pimelodus blochii	doi:10.5061/dryad.117tn	Siluriformes	Pimelodus blochii
Nap-S	Nap-S_67	Nap-S.fasta	Pimelodus blochii	doi:10.5061/dryad.117tn	Siluriformes	Pimelodus blochii
Nap-S	Nap-S_68	Nap-S.fasta	Pimelodus blochii	doi:10.5061/dryad.117tn	Siluriformes	Pimelodus blochii
Nap-S	Nap-S_69	Nap-S.fasta	Pimelodina flavipinnis	doi:10.5061/dryad.117tn	Siluriformes	Pimelodina flavipinnis
Nap-S	Nap-S_70	Nap-S.fasta	Pimelodus blochii	doi:10.5061/dryad.117tn	Siluriformes	Pimelodus blochii
Nap-S	Nap-S_71	Nap-S.fasta	Brachyplastoma vaillantii	doi:10.5061/dryad.117tn	Siluriformes	Brachyplatystoma vaillantii
Nap-S	Nap-S_72	Nap-S.fasta	Pimelodus blochii	doi:10.5061/dryad.117tn	Siluriformes	Pimelodus A-C34
Nap-S	Nap-S_73	Nap-S.fasta	Brachyplastoma filamentosum	doi:10.5061/dryad.117tn	Siluriformes	Brachyplatystoma filamentosum
Nap-S	Nap-S_74	Nap-S.fasta	Brachyplastoma vaillantii	doi:10.5061/dryad.117tn	Siluriformes	Brachyplatystoma vaillantii
Nap-S	Nap-S_75	Nap-S.fasta	Pimelodus blochii	doi:10.5061/dryad.117tn	Siluriformes	Pimelodus blochii
Nap-S	Nap-S_76	Nap-S.fasta	Brachyplastoma vaillantii	doi:10.5061/dryad.117tn	Siluriformes	Brachyplatystoma vaillantii
Nap-S	Nap-S_77	Nap-S.fasta	Pimelodus blochii	doi:10.5061/dryad.117tn	Siluriformes	Pimelodus A-C34
Nap-S	Nap-S_78	Nap-S.fasta	Pimelodus blochii	doi:10.5061/dryad.117tn	Siluriformes	Pimelodus blochii
Nap-S	Nap-S_79	Nap-S.fasta	Pimelodina flavipinnis	doi:10.5061/dryad.117tn	Siluriformes	Pimelodina flavipinnis
Nap-S	Nap-S_80	Nap-S.fasta	Pimelodus blochii	doi:10.5061/dryad.117tn	Siluriformes	Pimelodus blochii
Nap-S	Nap-S_81	Nap-S.fasta	Pimelodus blochii	doi:10.5061/dryad.117tn	Siluriformes	Pimelodus blochii
Nap-S	Nap-S_82	Nap-S.fasta	Pseudoplatystoma tigrinum	doi:10.5061/dryad.117tn	Siluriformes	Pseudoplatystoma tigrinum
Nap-S	Nap-S_83	Nap-S.fasta	Pimelodus blochii	doi:10.5061/dryad.117tn	Siluriformes	Pimelodus blochii
Nap-S	Nap-S_84	Nap-S.fasta	Pimelodus blochii	doi:10.5061/dryad.117tn	Siluriformes	Pimelodus blochii
Nap-S	Nap-S_85	Nap-S.fasta	Brachyplastoma vaillantii	doi:10.5061/dryad.117tn	Siluriformes	Brachyplatystoma vaillantii
Nap-S	Nap-S_86	Nap-S.fasta	Brachyplastoma vaillantii	doi:10.5061/dryad.117tn	Siluriformes	Brachyplatystoma vaillantii
Nap-S	Nap-S_87	Nap-S.fasta	Brachyplastoma vaillantii	doi:10.5061/dryad.117tn	Siluriformes	Brachyplatystoma vaillantii
Nap-S	Nap-S_88	Nap-S.fasta	Brachyplastoma vaillantii	doi:10.5061/dryad.117tn	Siluriformes	Brachyplatystoma vaillantii
Nap-S	Nap-S_89	Nap-S.fasta	Brachyplastoma vaillantii	doi:10.5061/dryad.117tn	Siluriformes	Brachyplatystoma vaillantii
Nap-S	Nap-S_90	Nap-S.fasta	Pimelodus blochii	doi:10.5061/dryad.117tn	Siluriformes	Pimelodus blochii
Nap-S	Nap-S_91	Nap-S.fasta	Brachyplastoma vaillantii	doi:10.5061/dryad.117tn	Siluriformes	Brachyplatystoma vaillantii
Nap-S	Nap-S_92	Nap-S.fasta	Brachyplastoma filamentosum	doi:10.5061/dryad.117tn	Siluriformes	Brachyplatystoma filamentosum
Nap-S	Nap-S_93	Nap-S.fasta	Brachyplastoma vaillantii	doi:10.5061/dryad.117tn	Siluriformes	Brachyplatystoma vaillantii
Nap-S	Nap-S_94	Nap-S.fasta	Brachyplastoma vaillantii	doi:10.5061/dryad.117tn	Siluriformes	Brachyplatystoma vaillantii
Nap-S	Nap-S_95	Nap-S.fasta	Hypophthalmus sp.C95	doi:10.5061/dryad.117tn	Siluriformes	Hypophthalmus sp-C95
Nap-S	Nap-S_96	Nap-S.fasta	Brachyplastoma vaillantii	doi:10.5061/dryad.117tn	Siluriformes	Brachyplatystoma vaillantii
Nap-S	Nap-S_97	Nap-S.fasta	Brachyplastoma vaillantii	doi:10.5061/dryad.117tn	Siluriformes	Brachyplatystoma vaillantii
Nap-S	Nap-S_98	Nap-S.fasta	Brachyplastoma vaillantii	doi:10.5061/dryad.117tn	Siluriformes	Brachyplatystoma vaillantii
Nap-S	Nap-S_99	Nap-S.fasta	Brachyplastoma vaillantii	doi:10.5061/dryad.117tn	Siluriformes	Brachyplatystoma vaillantii
Nap-S	Nap-S_100	Nap-S.fasta	Brachyplastoma vaillantii	doi:10.5061/dryad.117tn	Siluriformes	Brachyplatystoma vaillantii
Nap-S	Nap-S_101	Nap-S.fasta	Brachyplastoma vaillantii	doi:10.5061/dryad.117tn	Siluriformes	Brachyplatystoma vaillantii
Nap-S	Nap-S_102	Nap-S.fasta	Brachyplastoma vaillantii	doi:10.5061/dryad.117tn	Siluriformes	Brachyplatystoma vaillantii
Mar-S	Mar-S_1	Mar-S.fasta	Not Siluriformes	doi:10.5061/dryad.117tn	Characiformes	Psectrogaster amazonica
Mar-S	Mar-S_2	Mar-S.fasta	Brachyplastoma filamentosum	doi:10.5061/dryad.117tn	Siluriformes	Brachyplatystoma filamentosum
Mar-S	Mar-S_3	Mar-S.fasta	Brachyplastoma filamentosum	doi:10.5061/dryad.117tn	Siluriformes	Brachyplatystoma filamentosum
Mar-S	Mar-S_4	Mar-S.fasta	Not Siluriformes	doi:10.5061/dryad.117tn	Characiformes	Piaractus mesopotamicus
Mar-S	Mar-S_5	Mar-S.fasta	Not Siluriformes	doi:10.5061/dryad.117tn	Characiformes	Astyanax	Not primary assigned	Astyanax
Mar-S	Mar-S_6	Mar-S.fasta	Brachyplastoma vaillantii	doi:10.5061/dryad.117tn	Siluriformes	Brachyplatystoma vaillantii
Mar-S	Mar-S_7	Mar-S.fasta	Brachyplastoma vaillantii	doi:10.5061/dryad.117tn	Siluriformes	Brachyplatystoma vaillantii
Mar-S	Mar-S_8	Mar-S.fasta	Not Siluriformes	doi:10.5061/dryad.117tn	Characiformes	Schizodon fasciatus
Mar-S	Mar-S_9	Mar-S.fasta	Not Siluriformes	doi:10.5061/dryad.117tn	Characiformes	Brycon melanopterus
Mar-S	Mar-S_10	Mar-S.fasta	Not Siluriformes	doi:10.5061/dryad.117tn	Characiformes	Psectrogaster amazonica
Mar-S	Mar-S_11	Mar-S.fasta	Not Siluriformes	doi:10.5061/dryad.117tn	Characiformes	Mylossoma duriventre
Mar-S	Mar-S_12	Mar-S.fasta	Brachyplastoma vaillantii	doi:10.5061/dryad.117tn	Siluriformes	Brachyplatystoma vaillantii
Mar-S	Mar-S_13	Mar-S.fasta	Not Siluriformes	doi:10.5061/dryad.117tn	Characiformes	Brycon melanopterus
Mar-S	Mar-S_14	Mar-S.fasta	Brachyplastoma vaillantii	doi:10.5061/dryad.117tn	Siluriformes	Brachyplatystoma vaillantii
Mar-S	Mar-S_15	Mar-S.fasta	Not Siluriformes	doi:10.5061/dryad.117tn	Characiformes	Mylossoma duriventre
Mar-S	Mar-S_16	Mar-S.fasta	Not Siluriformes	doi:10.5061/dryad.117tn	Characiformes	Mylossoma aureum
Mar-S	Mar-S_17	Mar-S.fasta	Not Siluriformes	doi:10.5061/dryad.117tn	Characiformes	Prochilodus nigricans
Mar-S	Mar-S_18	Mar-S.fasta	Brachyplastoma vaillantii	doi:10.5061/dryad.117tn	Siluriformes	Brachyplatystoma vaillantii
Mar-S	Mar-S_19	Mar-S.fasta	Brachyplastoma vaillantii	doi:10.5061/dryad.117tn	Siluriformes	Brachyplatystoma vaillantii
Mar-S	Mar-S_20	Mar-S.fasta	Brachyplastoma vaillantii	doi:10.5061/dryad.117tn	Siluriformes	Brachyplatystoma vaillantii
Mar-S	Mar-S_21	Mar-S.fasta	Not Siluriformes	doi:10.5061/dryad.117tn	Characiformes	Semaprochilodus taeniurus
Mar-S	Mar-S_22	Mar-S.fasta	Not Siluriformes	doi:10.5061/dryad.117tn	Characiformes	Schizodon fasciatus
Mar-S	Mar-S_23	Mar-S.fasta	Not Siluriformes	doi:10.5061/dryad.117tn	Characiformes	Prochilodus nigricans
Mar-S	Mar-S_24	Mar-S.fasta	Not Siluriformes	doi:10.5061/dryad.117tn	Characiformes	Mylossoma duriventre
Mar-S	Mar-S_26	Mar-S.fasta	Not Siluriformes	doi:10.5061/dryad.117tn	Characiformes	Potamorhina altamazonica
Mar-S	Mar-S_27	Mar-S.fasta	Not Siluriformes	doi:10.5061/dryad.117tn	Characiformes	Piaractus mesopotamicus
Mar-S	Mar-S_28	Mar-S.fasta	Not Siluriformes	doi:10.5061/dryad.117tn	Characiformes	Mylossoma duriventre
Mar-S	Mar-S_29	Mar-S.fasta	Not Siluriformes	doi:10.5061/dryad.117tn	Characiformes	Schizodon fasciatus
Mar-S	Mar-S_30	Mar-S.fasta	Not Siluriformes	doi:10.5061/dryad.117tn	Characiformes	Mylossoma aureum
Mar-S	Mar-S_31	Mar-S.fasta	Not Siluriformes	doi:10.5061/dryad.117tn	Characiformes	Schizodon fasciatus
Mar-S	Mar-S_32	Mar-S.fasta	Brachyplastoma filamentosum	doi:10.5061/dryad.117tn	Siluriformes	Brachyplatystoma filamentosum
Mar-S	Mar-S_33	Mar-S.fasta	Not Siluriformes	doi:10.5061/dryad.117tn	Characiformes	Prochilodus nigricans
Mar-S	Mar-S_34	Mar-S.fasta	Not Siluriformes	doi:10.5061/dryad.117tn	Characiformes	Triportheus angulatus
Mar-S	Mar-S_35	Mar-S.fasta	Hypophthalmus sp.A289	doi:10.5061/dryad.117tn	Siluriformes	Hypophthalmus spA-289
Mar-S	Mar-S_36	Mar-S.fasta	Not Siluriformes	doi:10.5061/dryad.117tn	Characiformes	Curimata
Mar-S	Mar-S_37	Mar-S.fasta	Not Siluriformes	doi:10.5061/dryad.117tn	Characiformes	Schizodon fasciatus
Mar-S	Mar-S_38	Mar-S.fasta	Not Siluriformes	doi:10.5061/dryad.117tn	Characiformes	Potamorhina latior
Mar-S	Mar-S_39	Mar-S.fasta	Not Siluriformes	doi:10.5061/dryad.117tn	Characiformes	Schizodon fasciatus
Mar-S	Mar-S_40	Mar-S.fasta	Not Siluriformes	doi:10.5061/dryad.117tn	Characiformes	Schizodon fasciatus
Mar-S	Mar-S_41	Mar-S.fasta	Brachyplastoma filamentosum	doi:10.5061/dryad.117tn	Siluriformes	Brachyplatystoma filamentosum
Mar-S	Mar-S_42	Mar-S.fasta	Brachyplastoma vaillantii	doi:10.5061/dryad.117tn	Siluriformes	Brachyplatystoma vaillantii
Mar-S	Mar-S_43	Mar-S.fasta	Not Siluriformes	doi:10.5061/dryad.117tn	Characiformes	Semaprochilodus taeniurus
Mar-S	Mar-S_44	Mar-S.fasta	Not Siluriformes	doi:10.5061/dryad.117tn	Characiformes	Schizodon fasciatus
Mar-S	Mar-S_45	Mar-S.fasta	Hypophthalmus sp.A289	doi:10.5061/dryad.117tn	Siluriformes	Hypophthalmus spA-289
Mar-S	Mar-S_46	Mar-S.fasta	Hypophthalmus sp	doi:10.5061/dryad.117tn	Siluriformes	Hypophthalmus sp. CGD-2016
Mar-S	Mar-S_47	Mar-S.fasta	Brachyplastoma vaillantii	doi:10.5061/dryad.117tn	Siluriformes	Brachyplatystoma vaillantii
Mar-S	Mar-S_48	Mar-S.fasta	Brachyplastoma filamentosum	doi:10.5061/dryad.117tn	Siluriformes	Brachyplatystoma filamentosum
Mar-S	Mar-S_49	Mar-S.fasta	Brachyplastoma vaillantii	doi:10.5061/dryad.117tn	Siluriformes	Brachyplatystoma vaillantii
Mar-S	Mar-S_50	Mar-S.fasta	Hypophthalmus sp	doi:10.5061/dryad.117tn	Siluriformes	Hypophthalmus sp. CGD-2016
Mar-S	Mar-S_51	Mar-S.fasta	Brachyplastoma vaillantii	doi:10.5061/dryad.117tn	Siluriformes	Brachyplatystoma vaillantii
Mar-S	Mar-S_52	Mar-S.fasta	Brachyplastoma vaillantii	doi:10.5061/dryad.117tn	Siluriformes	Brachyplatystoma vaillantii
Mar-S	Mar-S_53	Mar-S.fasta	Brachyplastoma filamentosum	doi:10.5061/dryad.117tn	Siluriformes	Brachyplatystoma filamentosum
Mar-S	Mar-S_54	Mar-S.fasta	Not Siluriformes	doi:10.5061/dryad.117tn	Characiformes	Piaractus mesopotamicus
Mar-S	Mar-S_55	Mar-S.fasta	Brachyplastoma vaillantii	doi:10.5061/dryad.117tn	Siluriformes	Brachyplatystoma vaillantii
Mar-S	Mar-S_56	Mar-S.fasta	Brachyplastoma vaillantii	doi:10.5061/dryad.117tn	Siluriformes	Brachyplatystoma vaillantii
Mar-S	Mar-S_57	Mar-S.fasta	Not Siluriformes	doi:10.5061/dryad.117tn	Characiformes	Mylossoma aureum
Mar-S	Mar-S_58	Mar-S.fasta	Not Siluriformes	doi:10.5061/dryad.117tn	Characiformes	Schizodon fasciatus
Mar-S	Mar-S_59	Mar-S.fasta	Not Siluriformes	doi:10.5061/dryad.117tn	Characiformes	Leporinus trimaculatus
Mar-S	Mar-S_60	Mar-S.fasta	Not Siluriformes	doi:10.5061/dryad.117tn	Characiformes	Mylossoma aureum
Mar-S	Mar-S_61	Mar-S.fasta	Brachyplastoma vaillantii	doi:10.5061/dryad.117tn	Siluriformes	Brachyplatystoma vaillantii	Not primary assigned	Brachyplatystoma vaillantii (99.65%)
Mar-S	Mar-S_63	Mar-S.fasta	Not Siluriformes	doi:10.5061/dryad.117tn	Characiformes	Piaractus mesopotamicus
Mar-S	Mar-S_65	Mar-S.fasta	Not Siluriformes	doi:10.5061/dryad.117tn	Characiformes	Mylossoma duriventre
Mar-S	Mar-S_66	Mar-S.fasta	Not Siluriformes	doi:10.5061/dryad.117tn	Characiformes	Piaractus mesopotamicus
Mar-S	Mar-S_67	Mar-S.fasta	Not Siluriformes	doi:10.5061/dryad.117tn	Characiformes	Mylossoma duriventre
Mar-S	Mar-S_68	Mar-S.fasta	Not Siluriformes	doi:10.5061/dryad.117tn	Characiformes	Mylossoma duriventre
Mar-S	Mar-S_69	Mar-S.fasta	Not Siluriformes	doi:10.5061/dryad.117tn	Characiformes	Mylossoma duriventre
Mar-S	Mar-S_70	Mar-S.fasta	Not Siluriformes	doi:10.5061/dryad.117tn	Characiformes	Schizodon fasciatus
Mar-S	Mar-S_71	Mar-S.fasta	Not Siluriformes	doi:10.5061/dryad.117tn	Characiformes	Semaprochilodus taeniurus
Mar-S	Mar-S_72	Mar-S.fasta	Not Siluriformes	doi:10.5061/dryad.117tn	Characiformes	Semaprochilodus taeniurus
Mar-S	Mar-S_73	Mar-S.fasta	Brachyplastoma vaillantii	doi:10.5061/dryad.117tn	Siluriformes	Brachyplatystoma vaillantii
Mar-S	Mar-S_74	Mar-S.fasta	Not Siluriformes	doi:10.5061/dryad.117tn	Characiformes	Semaprochilodus taeniurus
Mar-S	Mar-S_75	Mar-S.fasta	Brachyplastoma vaillantii	doi:10.5061/dryad.117tn	Siluriformes	Brachyplatystoma vaillantii
Mar-S	Mar-S_76	Mar-S.fasta	Brachyplastoma vaillantii	doi:10.5061/dryad.117tn	Siluriformes	Brachyplatystoma vaillantii
Mar-S	Mar-S_77	Mar-S.fasta	Brachyplastoma vaillantii	doi:10.5061/dryad.117tn	Siluriformes	Brachyplatystoma vaillantii
Mar-S	Mar-S_78	Mar-S.fasta	Not Siluriformes	doi:10.5061/dryad.117tn	Characiformes	Piaractus mesopotamicus
Mar-S	Mar-S_79	Mar-S.fasta	Brachyplastoma vaillantii	doi:10.5061/dryad.117tn	Siluriformes	Brachyplatystoma vaillantii
Mar-S	Mar-S_80	Mar-S.fasta	Brachyplastoma vaillantii	doi:10.5061/dryad.117tn	Siluriformes	Brachyplatystoma vaillantii
Mar-S	Mar-S_81	Mar-S.fasta	Brachyplastoma vaillantii	doi:10.5061/dryad.117tn	Siluriformes	Brachyplatystoma vaillantii
Mar-S	Mar-S_82	Mar-S.fasta	Not Siluriformes	doi:10.5061/dryad.117tn	Characiformes	Semaprochilodus taeniurus
Mar-S	Mar-S_83	Mar-S.fasta	Not Siluriformes	doi:10.5061/dryad.117tn	Characiformes	Prochilodus nigricans
Mar-S	Mar-S_84	Mar-S.fasta	Not Siluriformes	doi:10.5061/dryad.117tn	Characiformes	Schizodon fasciatus
Mar-S	Mar-S_85	Mar-S.fasta	Not Siluriformes	doi:10.5061/dryad.117tn	Characiformes	Schizodon fasciatus
Mar-S	Mar-S_86	Mar-S.fasta	Not Siluriformes	doi:10.5061/dryad.117tn	Characiformes	Potamorhina latior
Mar-S	Mar-S_87	Mar-S.fasta	Not Siluriformes	doi:10.5061/dryad.117tn	Characiformes	Mylossoma duriventre
Mar-S	Mar-S_88	Mar-S.fasta	Not Siluriformes	doi:10.5061/dryad.117tn	Characiformes	Schizodon fasciatus
Mar-S	Mar-S_89	Mar-S.fasta	Brachyplastoma rousseauxii	doi:10.5061/dryad.117tn	Siluriformes	Brachyplatystoma rousseauxii
Mar-S	Mar-S_90	Mar-S.fasta	Not Siluriformes	doi:10.5061/dryad.117tn	Characiformes	Mylossoma duriventre
Mar-S	Mar-S_91	Mar-S.fasta	Not Siluriformes	doi:10.5061/dryad.117tn	Characiformes	Piaractus mesopotamicus
Mar-S	Mar-S_92	Mar-S.fasta	Pimelodus blochii	doi:10.5061/dryad.117tn	Siluriformes	Pimelodus blochii
Mar-S	Mar-S_93	Mar-S.fasta	Not Siluriformes	doi:10.5061/dryad.117tn	Characiformes	Schizodon fasciatus
Mar-S	Mar-S_94	Mar-S.fasta	Not Siluriformes	doi:10.5061/dryad.117tn	Characiformes	Mylossoma duriventre
Mar-S	Mar-S_95	Mar-S.fasta	Not Siluriformes	doi:10.5061/dryad.117tn	Characiformes	Schizodon fasciatus
Mar-S	Mar-S_96	Mar-S.fasta	Not Siluriformes	doi:10.5061/dryad.117tn	Characiformes	Potamorhina altamazonica
Mar-S	Mar-S_97	Mar-S.fasta	Not Siluriformes	doi:10.5061/dryad.117tn	Characiformes	Piaractus mesopotamicus
Mar-S	Mar-S_98	Mar-S.fasta	Not Siluriformes	doi:10.5061/dryad.117tn	Characiformes	Prochilodus nigricans
Mar-S	Mar-S_99	Mar-S.fasta	Not Siluriformes	doi:10.5061/dryad.117tn	Characiformes	Mylossoma duriventre
Mar-S	Mar-S_100	Mar-S.fasta	Brachyplastoma vaillantii	doi:10.5061/dryad.117tn	Siluriformes	Brachyplatystoma vaillantii
Mar-S	Mar-S_101	Mar-S.fasta	Not Siluriformes	doi:10.5061/dryad.117tn	Characiformes	Mylossoma duriventre
Mar-S	Mar-S_102	Mar-S.fasta	Not Siluriformes	doi:10.5061/dryad.117tn	Characiformes	Prochilodus nigricans
Mar-S	Mar-S_103	Mar-S.fasta	Not Siluriformes	doi:10.5061/dryad.117tn	Characiformes	Potamorhina latior
Mar-S	Mar-S_104	Mar-S.fasta	Brachyplastoma vaillantii	doi:10.5061/dryad.117tn	Siluriformes	Brachyplatystoma vaillantii
Mar-S	Mar-S_105	Mar-S.fasta	Not Siluriformes	doi:10.5061/dryad.117tn	Characiformes	Triportheus angulatus
Mar-S	Mar-S_106	Mar-S.fasta	Not Siluriformes	doi:10.5061/dryad.117tn	Characiformes	Mylossoma duriventre
Mar-S	Mar-S_107	Mar-S.fasta	Not Siluriformes	doi:10.5061/dryad.117tn	Characiformes	Potamorhina latior
Mar-S	Mar-S_108	Mar-S.fasta	Not Siluriformes	doi:10.5061/dryad.117tn	Characiformes	Schizodon fasciatus
Mar-S	Mar-S_109	Mar-S.fasta	Not Siluriformes	doi:10.5061/dryad.117tn	Characiformes	Mylossoma duriventre
Mar-S	Mar-S_110	Mar-S.fasta	Not Siluriformes	doi:10.5061/dryad.117tn	Characiformes	Triportheus elongatus
Mar-S	Mar-S_111	Mar-S.fasta	Not Siluriformes	doi:10.5061/dryad.117tn	Characiformes	Piaractus mesopotamicus
Mar-S	Mar-S_112	Mar-S.fasta	Not Siluriformes	doi:10.5061/dryad.117tn	Characiformes	Triportheus elongatus
Mar-S	Mar-S_113	Mar-S.fasta	Hypophthalmus sp.C95	doi:10.5061/dryad.117tn	Siluriformes	Hypophthalmus sp-C95
Mar-S	Mar-S_114	Mar-S.fasta	Not Siluriformes	doi:10.5061/dryad.117tn	Characiformes	Prochilodus nigricans
Mar-S	Mar-S_115	Mar-S.fasta	Not Siluriformes	doi:10.5061/dryad.117tn	Characiformes	Schizodon fasciatus	Not primary assigned	Schizodon fasciatus (99.1%)
Mar-S	Mar-S_116	Mar-S.fasta	Brachyplastoma vaillantii	doi:10.5061/dryad.117tn	Siluriformes	Brachyplatystoma vaillantii
Mar-S	Mar-S_117	Mar-S.fasta	Not Siluriformes	doi:10.5061/dryad.117tn	Characiformes	Mylossoma duriventre
Mar-S	Mar-S_118	Mar-S.fasta	Not Siluriformes	doi:10.5061/dryad.117tn	Characiformes	Mylossoma duriventre
Mar-S	Mar-S_119	Mar-S.fasta	Not Siluriformes	doi:10.5061/dryad.117tn	Characiformes	Prochilodus nigricans
Mar-S	Mar-S_120	Mar-S.fasta	Brachyplastoma vaillantii	doi:10.5061/dryad.117tn	Siluriformes	Brachyplatystoma vaillantii
Mar-S	Mar-S_121	Mar-S.fasta	Not Siluriformes	doi:10.5061/dryad.117tn	Characiformes	Mylossoma duriventre
Mar-S	Mar-S_122	Mar-S.fasta	Not Siluriformes	doi:10.5061/dryad.117tn	Characiformes	Mylossoma duriventre
Mar-S	Mar-S_123	Mar-S.fasta	Not Siluriformes	doi:10.5061/dryad.117tn	Characiformes	Schizodon fasciatus
Mar-S	Mar-S_124	Mar-S.fasta	Not Siluriformes	doi:10.5061/dryad.117tn	Characiformes	Prochilodus nigricans
Mar-S	Mar-S_125	Mar-S.fasta	Hypophthalmus sp	doi:10.5061/dryad.117tn	Siluriformes	Hypophthalmus sp. CGD-2016
Mar-S	Mar-S_126	Mar-S.fasta	Not Siluriformes	doi:10.5061/dryad.117tn	Characiformes	Mylossoma duriventre
Mar-S	Mar-S_127	Mar-S.fasta	Brachyplastoma vaillantii	doi:10.5061/dryad.117tn	Siluriformes	Brachyplatystoma vaillantii
Mar-S	Mar-S_128	Mar-S.fasta	Not Siluriformes	doi:10.5061/dryad.117tn	Characiformes	Mylossoma duriventre
Mar-S	Mar-S_129	Mar-S.fasta	Not Siluriformes	doi:10.5061/dryad.117tn	Characiformes	Brycon melanopterus
Mar-S	Mar-S_130	Mar-S.fasta	Not Siluriformes	doi:10.5061/dryad.117tn	Characiformes	Triportheus elongatus
Mar-S	Mar-S_131	Mar-S.fasta	Hypophthalmus sp	doi:10.5061/dryad.117tn	Siluriformes	Hypophthalmus sp. CGD-2016
Mar-S	Mar-S_133	Mar-S.fasta	Brachyplastoma vaillantii	doi:10.5061/dryad.117tn	Siluriformes	Brachyplatystoma vaillantii	Not primary assigned	Brachyplatystoma vaillantii
Mar-S	Mar-S_134	Mar-S.fasta	Not Siluriformes	doi:10.5061/dryad.117tn	Characiformes	Schizodon fasciatus
Mar-S	Mar-S_135	Mar-S.fasta	Not Siluriformes	doi:10.5061/dryad.117tn	Characiformes	Mylossoma duriventre
Mar-S	Mar-S_136	Mar-S.fasta	Not Siluriformes	doi:10.5061/dryad.117tn	Characiformes	Leporinus trimaculatus
Mar-S	Mar-S_137	Mar-S.fasta	Brachyplastoma vaillantii	doi:10.5061/dryad.117tn	Siluriformes	Brachyplatystoma vaillantii
Mar-S	Mar-S_138	Mar-S.fasta	Not Siluriformes	doi:10.5061/dryad.117tn	Characiformes	Mylossoma duriventre
Mar-S	Mar-S_139	Mar-S.fasta	Brachyplastoma vaillantii	doi:10.5061/dryad.117tn	Siluriformes	Brachyplatystoma vaillantii
Mar-S	Mar-S_140	Mar-S.fasta	Not Siluriformes	doi:10.5061/dryad.117tn	Characiformes	Piaractus mesopotamicus
Mar-S	Mar-S_141	Mar-S.fasta	Not Siluriformes	doi:10.5061/dryad.117tn	#N/A	Not assigned	Not primary assigned low quality	Low quality
Mar-S	Mar-S_142	Mar-S.fasta	Brachyplastoma vaillantii	doi:10.5061/dryad.117tn	Siluriformes	Brachyplatystoma vaillantii
Mar-S	Mar-S_143	Mar-S.fasta	Not Siluriformes	doi:10.5061/dryad.117tn	Characiformes	Prochilodus nigricans
Mar-S	Mar-S_144	Mar-S.fasta	Not Siluriformes	doi:10.5061/dryad.117tn	Characiformes	Schizodon fasciatus
Mar-S	Mar-S_145	Mar-S.fasta	Not Siluriformes	doi:10.5061/dryad.117tn	Characiformes	Schizodon fasciatus
Mar-S	Mar-S_146	Mar-S.fasta	Not Siluriformes	doi:10.5061/dryad.117tn	Characiformes	Triportheus angulatus
Mar-S	Mar-S_147	Mar-S.fasta	Not Siluriformes	doi:10.5061/dryad.117tn	Characiformes	Schizodon fasciatus
Mar-S	Mar-S_148	Mar-S.fasta	Brachyplastoma vaillantii	doi:10.5061/dryad.117tn	Siluriformes	Brachyplatystoma vaillantii
Mar-S	Mar-S_149	Mar-S.fasta	Brachyplastoma vaillantii	doi:10.5061/dryad.117tn	Siluriformes	Brachyplatystoma vaillantii
Mar-S	Mar-S_150	Mar-S.fasta	Not Siluriformes	doi:10.5061/dryad.117tn	Characiformes	Mylossoma duriventre
Mar-S	Mar-S_151	Mar-S.fasta	Not Siluriformes	doi:10.5061/dryad.117tn	Characiformes	Mylossoma duriventre
Mar-S	Mar-S_152	Mar-S.fasta	Not Siluriformes	doi:10.5061/dryad.117tn	Characiformes	Schizodon fasciatus
Mar-S	Mar-S_153	Mar-S.fasta	Not Siluriformes	doi:10.5061/dryad.117tn	Characiformes	Schizodon fasciatus
Mar-S	Mar-S_154	Mar-S.fasta	Not Siluriformes	doi:10.5061/dryad.117tn	Characiformes	Prochilodus nigricans
Mar-S	Mar-S_155	Mar-S.fasta	Not Siluriformes	doi:10.5061/dryad.117tn	Characiformes	Triportheus elongatus
Mar-S	Mar-S_156	Mar-S.fasta	Not Siluriformes	doi:10.5061/dryad.117tn	Characiformes	Psectrogaster curviventris	Not primary assigned	Psectrogaster curviventris (98.84%)
Mar-S	Mar-S_157	Mar-S.fasta	Not Siluriformes	doi:10.5061/dryad.117tn	Characiformes	Semaprochilodus taeniurus
Mar-S	Mar-S_158	Mar-S.fasta	Pimelodus spC	doi:10.5061/dryad.117tn	Siluriformes	Pimelodus sp. C CGD-2016
Mar-S	Mar-S_159	Mar-S.fasta	Not Siluriformes	doi:10.5061/dryad.117tn	Characiformes	Mylossoma duriventre
Mar-S	Mar-S_160	Mar-S.fasta	Not Siluriformes	doi:10.5061/dryad.117tn	Characiformes	Mylossoma duriventre
Mar-S	Mar-S_161	Mar-S.fasta	Brachyplastoma vaillantii	doi:10.5061/dryad.117tn	Siluriformes	Brachyplatystoma vaillantii
Mar-S	Mar-S_162	Mar-S.fasta	Not Siluriformes	doi:10.5061/dryad.117tn	Characiformes	Schizodon fasciatus
Mar-S	Mar-S_163	Mar-S.fasta	Not Siluriformes	doi:10.5061/dryad.117tn	Characiformes	Schizodon fasciatus
Mar-S	Mar-S_165	Mar-S.fasta	Not Siluriformes	doi:10.5061/dryad.117tn	Characiformes	Schizodon fasciatus
Mar-S	Mar-S_166	Mar-S.fasta	Not Siluriformes	doi:10.5061/dryad.117tn	Characiformes	Triportheus angulatus
Mar-S	Mar-S_167	Mar-S.fasta	Not Siluriformes	doi:10.5061/dryad.117tn	Characiformes	Triportheus angulatus
Mar-S	Mar-S_168	Mar-S.fasta	Not Siluriformes	doi:10.5061/dryad.117tn	Characiformes	Anodus elongatus
Mar-S	Mar-S_169	Mar-S.fasta	Not Siluriformes	doi:10.5061/dryad.117tn	Clupeiform	Pellona	Not primary assigned	Pellona
Mar-S	Mar-S_170	Mar-S.fasta	Phractocephalus hemioliopterus	doi:10.5061/dryad.117tn	Siluriformes	Phractocephalus hemioliopterus
Mar-S	Mar-S_171	Mar-S.fasta	Hypophthalmus sp	doi:10.5061/dryad.117tn	Siluriformes	Hypophthalmus sp. CGD-2016
Mar-S	Mar-S_172	Mar-S.fasta	Not Siluriformes	doi:10.5061/dryad.117tn	Characiformes	Piaractus mesopotamicus
Mar-S	Mar-S_173	Mar-S.fasta	Not Siluriformes	doi:10.5061/dryad.117tn	Characiformes	Schizodon fasciatus
Mar-S	Mar-S_174	Mar-S.fasta	Not Siluriformes	doi:10.5061/dryad.117tn	Characiformes	Schizodon fasciatus
Mar-S	Mar-S_175	Mar-S.fasta	Brachyplastoma filamentosum	doi:10.5061/dryad.117tn	Siluriformes	Brachyplatystoma filamentosum
Mar-S	Mar-S_176	Mar-S.fasta	Brachyplastoma vaillantii	doi:10.5061/dryad.117tn	Siluriformes	Brachyplatystoma vaillantii
Mar-S	Mar-S_178	Mar-S.fasta	Not Siluriformes	doi:10.5061/dryad.117tn	Characiformes	Mylossoma duriventre
Mar-S	Mar-S_179	Mar-S.fasta	Not Siluriformes	doi:10.5061/dryad.117tn	Characiformes	Anodus elongatus	Not primary assigned	Anodus elongatus (99.3%)
Mar-S	Mar-S_180	Mar-S.fasta	Not Siluriformes	doi:10.5061/dryad.117tn	Characiformes	Mylossoma duriventre
Mar-S	Mar-S_181	Mar-S.fasta	Not Siluriformes	doi:10.5061/dryad.117tn	Characiformes	Potamorhina altamazonica
Mar-S	Mar-S_182	Mar-S.fasta	Not Siluriformes	doi:10.5061/dryad.117tn	Characiformes	Piaractus mesopotamicus
Mar-S	Mar-S_183	Mar-S.fasta	Not Siluriformes	doi:10.5061/dryad.117tn	Characiformes	Piaractus mesopotamicus
Mar-S	Mar-S_184	Mar-S.fasta	Not Siluriformes	doi:10.5061/dryad.117tn	Characiformes	Piaractus mesopotamicus
Mar-S	Mar-S_185	Mar-S.fasta	Not Siluriformes	doi:10.5061/dryad.117tn	Characiformes	Piaractus mesopotamicus
Mar-S	Mar-S_186	Mar-S.fasta	Not Siluriformes	doi:10.5061/dryad.117tn	Characiformes	Mylossoma duriventre
Mar-S	Mar-S_187	Mar-S.fasta	Not Siluriformes	doi:10.5061/dryad.117tn	Characiformes	Piaractus mesopotamicus
Mar-S	Mar-S_188	Mar-S.fasta	Brachyplastoma vaillantii	doi:10.5061/dryad.117tn	Siluriformes	Brachyplatystoma vaillantii
Mar-S	Mar-S_189	Mar-S.fasta	Not Siluriformes	doi:10.5061/dryad.117tn	Characiformes	Mylossoma duriventre
Mar-S	Mar-S_190	Mar-S.fasta	Not Siluriformes	doi:10.5061/dryad.117tn	Characiformes	Piaractus mesopotamicus
Mar-S	Mar-S_191	Mar-S.fasta	Not Siluriformes	doi:10.5061/dryad.117tn	Characiformes	Prochilodus nigricans
Mar-S	Mar-S_192	Mar-S.fasta	Brachyplastoma vaillantii	doi:10.5061/dryad.117tn	Siluriformes	Brachyplatystoma vaillantii
Mar-S	Mar-S_194	Mar-S.fasta	Not Siluriformes	doi:10.5061/dryad.117tn	Characiformes	Brycon melanopterus
Mar-S	Mar-S_195	Mar-S.fasta	Not Siluriformes	doi:10.5061/dryad.117tn	Characiformes	Schizodon fasciatus
Mar-S	Mar-S_196	Mar-S.fasta	Not Siluriformes	doi:10.5061/dryad.117tn	Characiformes	Potamorhina altamazonica
Mar-S	Mar-S_197	Mar-S.fasta	Not Siluriformes	doi:10.5061/dryad.117tn	Characiformes	Potamorhina altamazonica
Mar-S	Mar-S_198	Mar-S.fasta	Hypophthalmus sp.A289	doi:10.5061/dryad.117tn	Siluriformes	Hypophthalmus spA-289
Mar-S	Mar-S_200	Mar-S.fasta	Pseudoplatystoma tigrinum	doi:10.5061/dryad.117tn	Siluriformes	Pseudoplatystoma tigrinum
Mar-S	Mar-S_201	Mar-S.fasta	Not Siluriformes	doi:10.5061/dryad.117tn	Characiformes	Schizodon fasciatus
Mar-S	Mar-S_203	Mar-S.fasta	Brachyplastoma vaillantii	doi:10.5061/dryad.117tn	Siluriformes	Brachyplatystoma vaillantii
Mar-S	Mar-S_204	Mar-S.fasta	Not Siluriformes	doi:10.5061/dryad.117tn	Characiformes	Schizodon fasciatus
Mar-S	Mar-S_205	Mar-S.fasta	Not Siluriformes	doi:10.5061/dryad.117tn	Characiformes	Schizodon fasciatus
Mar-S	Mar-S_206	Mar-S.fasta	Not Siluriformes	doi:10.5061/dryad.117tn	Characiformes	Triportheus angulatus
Mar-S	Mar-S_207	Mar-S.fasta	Not Siluriformes	doi:10.5061/dryad.117tn	Characiformes	Schizodon fasciatus
Mar-S	Mar-S_208	Mar-S.fasta	Not Siluriformes	doi:10.5061/dryad.117tn	Characiformes	Schizodon fasciatus
Mar-S	Mar-S_209	Mar-S.fasta	Not Siluriformes	doi:10.5061/dryad.117tn	Characiformes	Triportheus angulatus
Mar-S	Mar-S_210	Mar-S.fasta	Not Siluriformes	doi:10.5061/dryad.117tn	Characiformes	Psectrogaster amazonica
Mar-S	Mar-S_211	Mar-S.fasta	Brachyplastoma vaillantii	doi:10.5061/dryad.117tn	Siluriformes	Brachyplatystoma vaillantii
Mar-S	Mar-S_212	Mar-S.fasta	Brachyplastoma vaillantii	doi:10.5061/dryad.117tn	Siluriformes	Brachyplatystoma vaillantii
Mar-S	Mar-S_213	Mar-S.fasta	Not Siluriformes	doi:10.5061/dryad.117tn	Characiformes	Schizodon fasciatus
Mar-S	Mar-S_214	Mar-S.fasta	Not Siluriformes	doi:10.5061/dryad.117tn	Characiformes	Psectrogaster amazonica
Mar-S	Mar-S_216	Mar-S.fasta	Not Siluriformes	doi:10.5061/dryad.117tn	Characiformes	Triportheus angulatus
Mar-S	Mar-S_219	Mar-S.fasta	Not Siluriformes	doi:10.5061/dryad.117tn	Characiformes	Schizodon fasciatus
Mar-S	Mar-S_220	Mar-S.fasta	Not Siluriformes	doi:10.5061/dryad.117tn	Characiformes	Triportheus angulatus
Mar-S	Mar-S_221	Mar-S.fasta	Not Siluriformes	doi:10.5061/dryad.117tn	Characiformes	Triportheus angulatus
Mar-S	Mar-S_223	Mar-S.fasta	Hypophthalmus sp.A289	doi:10.5061/dryad.117tn	Siluriformes	Hypophthalmus spA-289
Mar-S	Mar-S_224	Mar-S.fasta	Not Siluriformes	doi:10.5061/dryad.117tn	Characiformes	Potamorhina altamazonica
Mar-S	Mar-S_225	Mar-S.fasta	Not Siluriformes	doi:10.5061/dryad.117tn	Characiformes	Schizodon fasciatus
Mar-S	Mar-S_226	Mar-S.fasta	Not Siluriformes	doi:10.5061/dryad.117tn	Characiformes	Potamorhina altamazonica
Mar-S	Mar-S_227	Mar-S.fasta	Not Siluriformes	doi:10.5061/dryad.117tn	Characiformes	Schizodon fasciatus
Mar-S	Mar-S_228	Mar-S.fasta	Not Siluriformes	doi:10.5061/dryad.117tn	Characiformes	Potamorhina altamazonica	Not primary assigned	Potamorhina altamazonica (99.39%)
Mar-S	Mar-S_229	Mar-S.fasta	Not Siluriformes	doi:10.5061/dryad.117tn	Characiformes	Triportheus angulatus
Mar-S	Mar-S_230	Mar-S.fasta	Not Siluriformes	doi:10.5061/dryad.117tn	Characiformes	Schizodon fasciatus
Mar-S	Mar-S_231	Mar-S.fasta	Not Siluriformes	doi:10.5061/dryad.117tn	Characiformes	Piaractus mesopotamicus	Not primary assigned	Piaractus mesopotamicus (98.48%)
Mar-S	Mar-S_232	Mar-S.fasta	Not Siluriformes	doi:10.5061/dryad.117tn	Characiformes	Prochilodus nigricans
Mar-S	Mar-S_233	Mar-S.fasta	Brachyplastoma vaillantii	doi:10.5061/dryad.117tn	Siluriformes	Brachyplatystoma vaillantii
Mar-S	Mar-S_234	Mar-S.fasta	Not Siluriformes	doi:10.5061/dryad.117tn	Characiformes	Schizodon fasciatus	Not primary assigned low quality	Schizodon fasciatus
Mar-S	Mar-S_235	Mar-S.fasta	Not Siluriformes	doi:10.5061/dryad.117tn	Characiformes	Mylossoma duriventre	Not primary assigned	Mylossoma duriventre (98.67%)
Mar-S	Mar-S_236	Mar-S.fasta	Not Siluriformes	doi:10.5061/dryad.117tn	Characiformes	Triportheus angulatus
Mar-S	Mar-S_237	Mar-S.fasta	Not Siluriformes	doi:10.5061/dryad.117tn	Characiformes	Schizodon fasciatus
Mar-S	Mar-S_240	Mar-S.fasta	Not Siluriformes	doi:10.5061/dryad.117tn	Characiformes	Mylossoma aureum
Mar-S	Mar-S_241	Mar-S.fasta	Not Siluriformes	doi:10.5061/dryad.117tn	Characiformes	Triportheus angulatus
Mar-S	Mar-S_242	Mar-S.fasta	Not Siluriformes	doi:10.5061/dryad.117tn	Characiformes	Schizodon fasciatus
Mar-S	Mar-S_243	Mar-S.fasta	Not Siluriformes	doi:10.5061/dryad.117tn	Characiformes	Anodus elongatus
Mar-S	Mar-S_244	Mar-S.fasta	Not Siluriformes	doi:10.5061/dryad.117tn	Characiformes	Schizodon fasciatus
Mar-S	Mar-S_245	Mar-S.fasta	Not Siluriformes	doi:10.5061/dryad.117tn	Characiformes	Schizodon fasciatus
Mar-S	Mar-S_246	Mar-S.fasta	Not Siluriformes	doi:10.5061/dryad.117tn	Characiformes	Mylossoma duriventre
Mar-S	Mar-S_247	Mar-S.fasta	Not Siluriformes	doi:10.5061/dryad.117tn	Characiformes	Schizodon fasciatus
Mar-S	Mar-S_248	Mar-S.fasta	Not Siluriformes	doi:10.5061/dryad.117tn	Characiformes	Schizodon fasciatus
Mar-S	Mar-S_249	Mar-S.fasta	Not Siluriformes	doi:10.5061/dryad.117tn	Characiformes	Anodus elongatus	Not primary assigned	Anodus elongatus (99.35%)
Mar-S	Mar-S_250	Mar-S.fasta	Not Siluriformes	doi:10.5061/dryad.117tn	Characiformes	Psectrogaster amazonica
Mar-S	Mar-S_251	Mar-S.fasta	Not Siluriformes	doi:10.5061/dryad.117tn	Characiformes	Psectrogaster amazonica
Mar-S	Mar-S_252	Mar-S.fasta	Not Siluriformes	doi:10.5061/dryad.117tn	Characiformes	Triportheus angulatus
Mar-S	Mar-S_253	Mar-S.fasta	Not Siluriformes	doi:10.5061/dryad.117tn	Characiformes	Potamorhina altamazonica
Mar-S	Mar-S_254	Mar-S.fasta	Not Siluriformes	doi:10.5061/dryad.117tn	Characiformes	Schizodon fasciatus
Mar-S	Mar-S_255	Mar-S.fasta	Not Siluriformes	doi:10.5061/dryad.117tn	Characiformes	Potamorhina altamazonica
Mar-S	Mar-S_256	Mar-S.fasta	Not Siluriformes	doi:10.5061/dryad.117tn	Characiformes	Psectrogaster amazonica
Mar-S	Mar-S_258	Mar-S.fasta	Hypophthalmus sp.A289	doi:10.5061/dryad.117tn	Siluriformes	Hypophthalmus spA-289
Mar-S	Mar-S_259	Mar-S.fasta	Not Siluriformes	doi:10.5061/dryad.117tn	Characiformes	Potamorhina latior
Mar-S	Mar-S_260	Mar-S.fasta	Not Siluriformes	doi:10.5061/dryad.117tn	Characiformes	Mylossoma duriventre
Mar-S	Mar-S_262	Mar-S.fasta	Not Siluriformes	doi:10.5061/dryad.117tn	Characiformes	Schizodon fasciatus
Mar-S	Mar-S_264	Mar-S.fasta	Not Siluriformes	doi:10.5061/dryad.117tn	Characiformes	Schizodon fasciatus
Mar-S	Mar-S_266	Mar-S.fasta	Not Siluriformes	doi:10.5061/dryad.117tn	Characiformes	Anodus elongatus
Mar-S	Mar-S_268	Mar-S.fasta	Not Siluriformes	doi:10.5061/dryad.117tn	Characiformes	Mylossoma duriventre
Mar-S	Mar-S_269	Mar-S.fasta	Not Siluriformes	doi:10.5061/dryad.117tn	Characiformes	Triportheus angulatus
Mar-S	Mar-S_270	Mar-S.fasta	Not Siluriformes	doi:10.5061/dryad.117tn	Characiformes	Potamorhina altamazonica
Mar-S	Mar-S_271	Mar-S.fasta	Not Siluriformes	doi:10.5061/dryad.117tn	Characiformes	Triportheus angulatus
Mar-S	Mar-S_272	Mar-S.fasta	Not Siluriformes	doi:10.5061/dryad.117tn	Characiformes	Psectrogaster amazonica
Mar-S	Mar-S_273	Mar-S.fasta	Not Siluriformes	doi:10.5061/dryad.117tn	Characiformes	Potamorhina altamazonica
Mar-S	Mar-S_274	Mar-S.fasta	Not Siluriformes	doi:10.5061/dryad.117tn	Characiformes	Potamorhina latior
Mar-S	Mar-S_275	Mar-S.fasta	Not Siluriformes	doi:10.5061/dryad.117tn	Clupeiform	Pellona	Not primary assigned	Pellona
Mar-S	Mar-S_276	Mar-S.fasta	Not Siluriformes	doi:10.5061/dryad.117tn	Characiformes	Potamorhina altamazonica
Mar-S	Mar-S_277	Mar-S.fasta	Pimelodus spA-C34	doi:10.5061/dryad.117tn	Siluriformes	Pimelodus A-C34
Mar-S	Mar-S_278	Mar-S.fasta	Not Siluriformes	doi:10.5061/dryad.117tn	Characiformes	Schizodon fasciatus
Mar-S	Mar-S_280	Mar-S.fasta	Not Siluriformes	doi:10.5061/dryad.117tn	Characiformes	Schizodon fasciatus
Mar-S	Mar-S_281	Mar-S.fasta	Not Siluriformes	doi:10.5061/dryad.117tn	Characiformes	Schizodon fasciatus
Mar-S	Mar-S_282	Mar-S.fasta	Not Siluriformes	doi:10.5061/dryad.117tn	Characiformes	Potamorhina altamazonica
Mar-S	Mar-S_284	Mar-S.fasta	Not Siluriformes	doi:10.5061/dryad.117tn	Characiformes	Mylossoma duriventre
Mar-S	Mar-S_285	Mar-S.fasta	Not Siluriformes	doi:10.5061/dryad.117tn	Characiformes	Mylossoma duriventre
Mar-S	Mar-S_286	Mar-S.fasta	Not Siluriformes	doi:10.5061/dryad.117tn	Characiformes	Prochilodus nigricans
Mar-S	Mar-S_288	Mar-S.fasta	Not Siluriformes	doi:10.5061/dryad.117tn	Characiformes	Psectrogaster amazonica
Mar-S	Mar-S_289	Mar-S.fasta	Hypophthalmus sp.A289	doi:10.5061/dryad.117tn	Siluriformes	Hypophthalmus spA-289
Mar-S	Mar-S_290	Mar-S.fasta	Not Siluriformes	doi:10.5061/dryad.117tn	Characiformes	Potamorhina altamazonica
Mar-S	Mar-S_291	Mar-S.fasta	Not Siluriformes	doi:10.5061/dryad.117tn	Characiformes	Psectrogaster amazonica
Mar-S	Mar-S_292	Mar-S.fasta	Not Siluriformes	doi:10.5061/dryad.117tn	Characiformes	Potamorhina latior
Mar-S	Mar-S_294	Mar-S.fasta	Not Siluriformes	doi:10.5061/dryad.117tn	Characiformes	Mylossoma duriventre
* MALT 08/08/2017 minSupportPercent=1.0E-9 minSupport=1 minScore=150.0 maxExpected=1.0 minPercentIdentity=98 topPercent=1.0E-9 lcaAlgorithm=naive minPercentReadToCover=0.0 minComplexity=0.0 longReads=false pairedReads=false useIdentityFilter=false readAssignmentMode=readCount fNames=;
