# Supplementary material for: Metabarcoding by capture using a single COI probe (MCSP) to identify and quantify fish species in ichthyoplankton swarms
Source: PLoS One. 2018 Sep 12;13(9):e0202976. doi: 10.1371/journal.pone.0202976 (PMC6135497; doi:10.1371/journal.pone.0202976)
Supplement: S5 Table — (XLSX) [file pone.0202976.s007.xlsx]

## Sheet: Feuil1
				RAW data extracted from MEGAN program								SANGER-reference		Filtered data used to compute correlation and draw graph
Genus-species	Site	Order	Code	COUNT				FREQUENCIES				COUNT	FREQUENCIES	Frequencies after applying max accuracy threshold observed in mock samples = 0,81		Frequencies after applying the threshold. Filter = max accuracy x probe (sil or Danio) x sample(mar or nap) x Mock (cf MAXSSS sheet)
				Bulk-SD	Bulk-SSil	Mock-SD	Mock-SSil	Bulk-SD	Bulk-SSil	Mock-SD	Mock-SSil	SANGER	SANGER	Bulk-SD	Bulk-SSil	Mock-SD	Mock-SSil
Actinopterygii environmental sample	MARANON	Actinopterygii	MARANON_Actinopterygii environmental sample	3	0	0	0	2.45809e-05	0	0	0	0	0	NA	NA	NA	NA		False negative
Anodus elongatus	MARANON	Characiformes	MARANON_Anodus elongatus	1524	6	1397	1	0.0124871	0.0023511	0.00621126	0.000426621	5	0.0189394	0.0124871	0	0.00621126	0		False positive
Anodus orinocensis	MARANON	Characiformes	MARANON_Anodus orinocensis	18	0	0	0	0.000147485	0	0	0	0	0	NA	NA	NA	NA		NA : not detected with both Sanger and NGS
Astyanax bimaculatus	MARANON	Characiformes	MARANON_Astyanax bimaculatus	0	0	98	2	0	0	0.000435722	0.000853242	0	0	NA	NA	NA	NA		True positive
Brycon melanopterus	MARANON	Characiformes	MARANON_Brycon melanopterus	3947	4	1585	4	0.0323403	0.0015674	0.00704714	0.00170648	4	0.0151515	0.0323403	0	0.00704714	0
Caenotropus labyrinthicus	MARANON	Characiformes	MARANON_Caenotropus labyrinthicus	762	0	0	0	0.00624355	0	0	0	0	0	NA	NA	NA	NA
Colossoma macropomum	MARANON	Characiformes	MARANON_Colossoma macropomum	2657	4	0	0	0.0217705	0.0015674	0	0	0	0	0.0217705	NA	NA	NA
Colossoma sp. KU 3081	MARANON	Characiformes	MARANON_Colossoma sp. KU 3081	196	0	252	0	0.00160595	0	0.00112043	0	0	0	NA	NA	0.00112043	NA
Curimata cyprinoides	MARANON	Characiformes	MARANON_Curimata cyprinoides	752	0	0	0	0.00616161	0	0	0	0	0	NA	NA	NA	NA
Curimatella lepidura	MARANON	Characiformes	MARANON_Curimatella lepidura	9	0	0	0	7.37427e-05	0	0	0	0	0	NA	NA	NA	NA
Cyphocharax vanderi	MARANON	Characiformes	MARANON_Cyphocharax vanderi	32	0	0	0	0.000262196	0	0	0	0	0	NA	NA	NA	NA
Hemiodus microlepis	MARANON	Characiformes	MARANON_Hemiodus microlepis	100	0	0	0	0.000819363	0	0	0	0	0	NA	NA	NA	NA
Hydrolycus scomberoides	MARANON	Characiformes	MARANON_Hydrolycus scomberoides	226	1	0	0	0.00185176	0.00039185	0	0	0	0	NA	NA	NA	NA
Leporinus agassizi	MARANON	Characiformes	MARANON_Leporinus agassizi	1	0	1	0	8.19363e-06	0	4.44614e-06	0	0	0	NA	NA	NA	NA
Leporinus fasciatus	MARANON	Characiformes	MARANON_Leporinus fasciatus	182	0	0	0	0.00149124	0	0	0	0	0	NA	NA	NA	NA
Leporinus macrocephalus	MARANON	Characiformes	MARANON_Leporinus macrocephalus	19	0	25	0	0.000155679	0	0.000111154	0	0	0	NA	NA	NA	NA
Leporinus paranensis	MARANON	Characiformes	MARANON_Leporinus paranensis	5	0	4	0	4.09682e-05	0	1.77846e-05	0	0	0	NA	NA	NA	NA
Leporinus trifasciatus	MARANON	Characiformes	MARANON_Leporinus trifasciatus	720	1	802	0	0.00589941	0.00039185	0.00356581	0	0	0	NA	NA	0.00356581	NA
Leporinus trimaculatus	MARANON	Characiformes	MARANON_Leporinus trimaculatus	55	0	232	1	0.00045065	0	0.00103151	0.000426621	2	0.00757576	0	0	0.00103151	0
Mylossoma aureum	MARANON	Characiformes	MARANON_Mylossoma aureum	2791	4	3450	7	0.0228684	0.0015674	0.0153392	0.00298635	5	0.0189394	0.0228684	0	0.0153392	0
Mylossoma duriventre	MARANON	Characiformes	MARANON_Mylossoma duriventre	7502	10	28954	26	0.0614686	0.0039185	0.128734	0.0110922	38	0.143939	0.0614686	0	0.128734	0.0110922
Pellona castelnaeana	MARANON	Characiformes	MARANON_Pellona castelnaeana	33	2	10	0	0.00027039	0.000783699	4.44614e-05	0	0	0	NA	NA	NA	NA
Piaractus brachypomus	MARANON	Characiformes	MARANON_Piaractus brachypomus	17732	39	15326	24	0.145289	0.0152821	0.0681416	0.0102389	18	0.0681818	0.136612	0.0152821	0.0681416	0.00981229
Potamorhina altamazonica	MARANON	Characiformes	MARANON_Potamorhina altamazonica	8881	13	36812	21	0.0727676	0.00509404	0.163671	0.00895904	15	0.0568182	0.0727676	0	0.163671	0.00895904
Potamorhina latior	MARANON	Characiformes	MARANON_Potamorhina latior	2823	3	6653	4	0.0231306	0.00117555	0.0295802	0.00170648	7	0.0265152	0.0231306	0	0.0295802	0
Prochilodus argenteus	MARANON	Characiformes	MARANON_Prochilodus argenteus	0	0	5	0	0	0	2.22307e-05	0	0	0	NA	NA	NA	NA
Prochilodus lineatus	MARANON	Characiformes	MARANON_Prochilodus lineatus	1021	13	2219	10	0.0083657	0.00509404	0.00986599	0.00426621	0	0	0.0083657	NA	0.00986599	NA
Prochilodus nigricans	MARANON	Characiformes	MARANON_Prochilodus nigricans	1290	8	2663	11	0.0105698	0.0031348	0.0118401	0.00469283	14	0.0530303	0.0105698	0	0.0118401	0.00469283
Prochilodus nigricans Agassiz	MARANON	Characiformes	MARANON_Prochilodus nigricans Agassiz	0	0	4	0	0	0	1.77846e-05	0	0	0	NA	NA	NA	NA
Prochilodus reticulatus	MARANON	Characiformes	MARANON_Prochilodus reticulatus	7	0	20	0	5.73554e-05	0	8.89229e-05	0	0	0	NA	NA	NA	NA
Prochilodus rubrotaeniatus	MARANON	Characiformes	MARANON_Prochilodus rubrotaeniatus	181	0	701	2	0.00148305	0	0.00311675	0.000853242	0	0	NA	NA	0.00311675	NA
Psectrogaster amazonica	MARANON	Characiformes	MARANON_Psectrogaster amazonica	2107	29	4950	36	0.017264	0.0113636	0.0220084	0.0153584	10	0.0378788	0.017264	0.0113636	0.0220084	0.0153584
Rhaphiodon vulpinus	MARANON	Characiformes	MARANON_Rhaphiodon vulpinus	171	3	116	0	0.00140111	0.00117555	0.000515753	0	0	0	NA	NA	NA	NA
Roeboides myersii	MARANON	Characiformes	MARANON_Roeboides myersii	1994	0	0	0	0.0163381	0	0	0	0	0	0.0163381	NA	NA	NA
Schizodon borellii	MARANON	Characiformes	MARANON_Schizodon borellii	2	0	5	0	1.63873e-05	0	2.22307e-05	0	0	0	NA	NA	NA	NA
Schizodon fasciatus	MARANON	Characiformes	MARANON_Schizodon fasciatus	16025	58	49518	117	0.131303	0.0227273	0.220164	0.0499147	53	0.200758	0.131303	0.0227273	0.220164	0.0499147
Schizodon intermedius	MARANON	Characiformes	MARANON_Schizodon intermedius	18	0	36	0	0.000147485	0	0.000160061	0	0	0	NA	NA	NA	NA
Schizodon scotorhabdotus	MARANON	Characiformes	MARANON_Schizodon scotorhabdotus	5	0	25	0	4.09682e-05	0	0.000111154	0	0	0	NA	NA	NA	NA
Schizodon vittatus	MARANON	Characiformes	MARANON_Schizodon vittatus	7	0	12	0	5.73554e-05	0	5.33537e-05	0	0	0	NA	NA	NA	NA
Semaprochilodus insignis	MARANON	Characiformes	MARANON_Semaprochilodus insignis	325	1	14	0	0.00266293	0.00039185	6.2246e-05	0	0	0	NA	NA	NA	NA
Semaprochilodus kneri	MARANON	Characiformes	MARANON_Semaprochilodus kneri	219	1	656	0	0.00179441	0.00039185	0.00291667	0	0	0	NA	NA	0.00291667	NA
Semaprochilodus taeniurus	MARANON	Characiformes	MARANON_Semaprochilodus taeniurus	974	1	2371	7	0.0079806	0.00039185	0.0105418	0.00298635	7	0.0265152	0	0	0.0105418	0
Tetragonopterus argenteus	MARANON	Characiformes	MARANON_Tetragonopterus argenteus	524	0	0	0	0.00429346	0	0	0	0	0	NA	NA	NA	NA
Triportheus angulatus	MARANON	Characiformes	MARANON_Triportheus angulatus	17553	17	25411	22	0.143823	0.00666144	0.112981	0.00938567	16	0.0606061	0.143823	0	0.112981	0.00938567
Triportheus elongatus	MARANON	Characiformes	MARANON_Triportheus elongatus	2893	4	4065	3	0.0237042	0.0015674	0.0180736	0.00127986	4	0.0151515	0.0237042	0	0.0180736	0
Triportheus nematurus	MARANON	Characiformes	MARANON_Triportheus nematurus	19	0	26	0	0.000155679	0	0.0001156	0	0	0	NA	NA	NA	NA
Danio rerio	MARANON	Cypriniform	MARANON_Danio rerio	0	0	0	0	0	0	0	0	0	0	NA	NA	NA	NA
Plagioscion auratus	MARANON	Perciform	MARANON_Plagioscion auratus	18	0	0	0	0.000147485	0	0	0	0	0	NA	NA	NA	NA
Plagioscion squamosissimus	MARANON	Perciform	MARANON_Plagioscion squamosissimus	113	0	2	0	0.00092588	0	8.89229e-06	0	0	0	NA	NA	NA	NA
Bergiaria westermanni	MARANON	Siluriformes	MARANON_Bergiaria westermanni	0	0	0	0	0	0	0	0	0	0	NA	NA	NA	NA
Brachyplatystoma capapretum	MARANON	Siluriformes	MARANON_Brachyplatystoma capapretum	7	0	9	0	5.73554e-05	0	4.00153e-05	0	0	0	NA	NA	NA	NA
Brachyplatystoma filamentosum	MARANON	Siluriformes	MARANON_Brachyplatystoma filamentosum	1805	56	2778	52	0.0147895	0.0219436	0.0123514	0.0221843	7	0.0265152	0.0147895	0.0219436	0.0123514	0.0221843
Brachyplatystoma rousseauxii	MARANON	Siluriformes	MARANON_Brachyplatystoma rousseauxii	0	1	391	6	0	0.00039185	0.00173844	0.00255973	1	0.00378788	0	0	0.00173844	0
Brachyplatystoma vaillantii	MARANON	Siluriformes	MARANON_Brachyplatystoma vaillantii	18847	1969	23549	1141	0.154425	0.771552	0.104702	0.486775	41	0.155303	0.154425	0.771552	0.104702	0.486775
Calophysus macropterus	MARANON	Siluriformes	MARANON_Calophysus macropterus	0	0	0	0	0	0	0	0	0	0	NA	NA	NA	NA
Cetopsis candiru	MARANON	Siluriformes	MARANON_Cetopsis candiru	2	0	0	0	1.63873e-05	0	0	0	0	0	NA	NA	NA	NA
Cetopsis coecutiens	MARANON	Siluriformes	MARANON_Cetopsis coecutiens	15	1	0	0	0.000122904	0.00039185	0	0	0	0	NA	NA	NA	NA
Hypophthalmus sp. CGD-2016	MARANON	Siluriformes	MARANON_Hypophthalmus sp. CGD-2016	730	91	2616	122	0.00598135	0.0356583	0.0116311	0.0520478	5	0.0189394	0	0.0356583	0.0116311	0.0520478
Hypophthalmus spA-289	MARANON	Siluriformes	MARANON_Hypophthalmus spA-289	76	24	2312	388	0.000622716	0.00940439	0.0102795	0.165529	6	0.0227273	0	0.00940439	0.0102795	0.165529
Hypophthalmus sp-C95	MARANON	Siluriformes	MARANON_Hypophthalmus sp-C95	1	0	737	27	8.19363e-06	0	0.00327681	0.0115188	1	0.00378788	0	0	0.00327681	0.0115188
Leiarius marmoratus	MARANON	Siluriformes	MARANON_Leiarius marmoratus	0	0	0	0	0	0	0	0	0	0	NA	NA	NA	NA
Phractocephalus hemioliopterus	MARANON	Siluriformes	MARANON_Phractocephalus hemioliopterus	0	0	1266	16	0	0	0.00562882	0.00682594	1	0.00378788	0	0	0.00562882	0.00682594
Pimelodina flavipinnis	MARANON	Siluriformes	MARANON_Pimelodina flavipinnis	1424	40	0	0	0.0116677	0.015674	0	0	0	0	0.0116677	0.015674	NA	NA
Pimelodus A-C34	MARANON	Siluriformes	MARANON_Pimelodus A-C34	0	0	123	3	0	0	0.000546876	0.00127986	1	0.00378788	0	0	0.000546876	0
Pimelodus albicans	MARANON	Siluriformes	MARANON_Pimelodus albicans	0	0	0	0	0	0	0	0	0	0	NA	NA	NA	NA
Pimelodus blochii	MARANON	Siluriformes	MARANON_Pimelodus blochii	8	0	871	26	6.55491e-05	0	0.00387259	0.0110922	1	0.00378788	0	0	0.00387259	0.0110922
Pimelodus cf. argenteus TPL-2014	MARANON	Siluriformes	MARANON_Pimelodus cf. argenteus TPL-2014	0	0	2	0	0	0	8.89229e-06	0	0	0	NA	NA	NA	NA
Pimelodus fur	MARANON	Siluriformes	MARANON_Pimelodus fur	0	0	0	0	0	0	0	0	0	0	NA	NA	NA	NA
Pimelodus pohli	MARANON	Siluriformes	MARANON_Pimelodus pohli	0	0	3	0	0	0	1.33384e-05	0	0	0	NA	NA	NA	NA
Pimelodus sp. C CGD-2016	MARANON	Siluriformes	MARANON_Pimelodus sp. C CGD-2016	1062	12	346	8	0.00870164	0.00470219	0.00153837	0.00341297	1	0.00378788	0.00870164	0	0.00153837	0
Platystomatichthys sturio	MARANON	Siluriformes	MARANON_Platystomatichthys sturio	4	0	0	0	3.27745e-05	0	0	0	0	0	NA	NA	NA	NA
Pseudoplatystoma corruscans	MARANON	Siluriformes	MARANON_Pseudoplatystoma corruscans	3	0	1	0	2.45809e-05	0	4.44614e-06	0	0	0	NA	NA	NA	NA
Pseudoplatystoma fasciatum	MARANON	Siluriformes	MARANON_Pseudoplatystoma fasciatum	178	104	4	0	0.00145847	0.0407524	1.77846e-05	0	0	0	NA	0.0407524	NA	NA
Pseudoplatystoma punctifer	MARANON	Siluriformes	MARANON_Pseudoplatystoma punctifer	62	3	0	0	0.000508005	0.00117555	0	0	0	0	NA	NA	NA	NA
Pseudoplatystoma reticulatum	MARANON	Siluriformes	MARANON_Pseudoplatystoma reticulatum	3	0	1	0	2.45809e-05	0	4.44614e-06	0	0	0	NA	NA	NA	NA
Pseudoplatystoma tigrinum	MARANON	Siluriformes	MARANON_Pseudoplatystoma tigrinum	2	3	1485	257	1.63873e-05	0.00117555	0.00660252	0.109642	1	0.00378788	0	0	0.00660252	0.109642
Pseudostegophilus nemurus	MARANON	Siluriformes	MARANON_Pseudostegophilus nemurus	981	0	0	0	0.00803795	0	0	0	0	0	NA	NA	NA	NA
Pterodoras granulosus	MARANON	Siluriformes	MARANON_Pterodoras granulosus	0	0	0	0	0	0	0	0	0	0	NA	NA	NA	NA
Sorubim lima	MARANON	Siluriformes	MARANON_Sorubim lima	400	26	0	0	0.00327745	0.0101881	0	0	0	0	NA	0.0101881	NA	NA
Zungaro jahu	MARANON	Siluriformes	MARANON_Zungaro jahu	0	0	0	0	0	0	0	0	0	0	NA	NA	NA	NA
Zungaro zungaro	MARANON	Siluriformes	MARANON_Zungaro zungaro	0	0	0	0	0	0	0	0	0	0	NA	NA	NA	NA
Actinopterygii environmental sample	NAPO	Actinopterygii	NAPO_Actinopterygii environmental sample	0	0	0	0	0	0	0	0	0	0	NA	NA	NA	NA
Anodus elongatus	NAPO	Characiformes	NAPO_Anodus elongatus	0	0	0	0	0	0	0	0	0	0	NA	NA	NA	NA
Anodus orinocensis	NAPO	Characiformes	NAPO_Anodus orinocensis	0	0	0	0	0	0	0	0	0	0	NA	NA	NA	NA
Astyanax bimaculatus	NAPO	Characiformes	NAPO_Astyanax bimaculatus	0	0	0	0	0	0	0	0	0	0	NA	NA	NA	NA
Brycon melanopterus	NAPO	Characiformes	NAPO_Brycon melanopterus	0	0	0	0	0	0	0	0	0	0	NA	NA	NA	NA
Caenotropus labyrinthicus	NAPO	Characiformes	NAPO_Caenotropus labyrinthicus	0	0	0	0	0	0	0	0	0	0	NA	NA	NA	NA
Colossoma macropomum	NAPO	Characiformes	NAPO_Colossoma macropomum	0	0	0	0	0	0	0	0	0	0	NA	NA	NA	NA
Colossoma sp. KU 3081	NAPO	Characiformes	NAPO_Colossoma sp. KU 3081	0	0	0	0	0	0	0	0	0	0	NA	NA	NA	NA
Curimata cyprinoides	NAPO	Characiformes	NAPO_Curimata cyprinoides	0	0	0	0	0	0	0	0	0	0	NA	NA	NA	NA
Curimatella lepidura	NAPO	Characiformes	NAPO_Curimatella lepidura	0	0	0	0	0	0	0	0	0	0	NA	NA	NA	NA
Cyphocharax vanderi	NAPO	Characiformes	NAPO_Cyphocharax vanderi	0	0	0	0	0	0	0	0	0	0	NA	NA	NA	NA
Hemiodus microlepis	NAPO	Characiformes	NAPO_Hemiodus microlepis	0	0	0	0	0	0	0	0	0	0	NA	NA	NA	NA
Hydrolycus scomberoides	NAPO	Characiformes	NAPO_Hydrolycus scomberoides	0	0	0	0	0	0	0	0	0	0	NA	NA	NA	NA
Leporinus agassizi	NAPO	Characiformes	NAPO_Leporinus agassizi	0	0	0	0	0	0	0	0	0	0	NA	NA	NA	NA
Leporinus fasciatus	NAPO	Characiformes	NAPO_Leporinus fasciatus	0	0	0	0	0	0	0	0	0	0	NA	NA	NA	NA
Leporinus macrocephalus	NAPO	Characiformes	NAPO_Leporinus macrocephalus	1	0	0	0	2.48392e-05	0	0	0	0	0	NA	NA	NA	NA
Leporinus paranensis	NAPO	Characiformes	NAPO_Leporinus paranensis	0	0	0	0	0	0	0	0	0	0	NA	NA	NA	NA
Leporinus trifasciatus	NAPO	Characiformes	NAPO_Leporinus trifasciatus	2	0	0	0	4.96783e-05	0	0	0	0	0	NA	NA	NA	NA
Leporinus trimaculatus	NAPO	Characiformes	NAPO_Leporinus trimaculatus	0	0	0	0	0	0	0	0	0	0	NA	NA	NA	NA
Mylossoma aureum	NAPO	Characiformes	NAPO_Mylossoma aureum	1	0	0	0	2.48392e-05	0	0	0	0	0	NA	NA	NA	NA
Mylossoma duriventre	NAPO	Characiformes	NAPO_Mylossoma duriventre	27	0	0	0	0.000670657	0	0	0	0	0	NA	NA	NA	NA
Pellona castelnaeana	NAPO	Characiformes	NAPO_Pellona castelnaeana	0	0	0	0	0	0	0	0	0	0	NA	NA	NA	NA
Piaractus brachypomus	NAPO	Characiformes	NAPO_Piaractus brachypomus	1	0	0	0	2.48392e-05	0	0	0	0	0	NA	NA	NA	NA
Potamorhina altamazonica	NAPO	Characiformes	NAPO_Potamorhina altamazonica	75	0	277	0	0.00186294	0	0.00122656	0	0	0	NA	NA	NA	NA
Potamorhina latior	NAPO	Characiformes	NAPO_Potamorhina latior	1	0	0	0	2.48392e-05	0	0	0	0	0	NA	NA	NA	NA
Prochilodus argenteus	NAPO	Characiformes	NAPO_Prochilodus argenteus	0	0	0	0	0	0	0	0	0	0	NA	NA	NA	NA
Prochilodus lineatus	NAPO	Characiformes	NAPO_Prochilodus lineatus	0	0	0	0	0	0	0	0	0	0	NA	NA	NA	NA
Prochilodus nigricans	NAPO	Characiformes	NAPO_Prochilodus nigricans	0	0	0	0	0	0	0	0	0	0	NA	NA	NA	NA
Prochilodus nigricans Agassiz	NAPO	Characiformes	NAPO_Prochilodus nigricans Agassiz	0	0	0	0	0	0	0	0	0	0	NA	NA	NA	NA
Prochilodus reticulatus	NAPO	Characiformes	NAPO_Prochilodus reticulatus	0	0	0	0	0	0	0	0	0	0	NA	NA	NA	NA
Prochilodus rubrotaeniatus	NAPO	Characiformes	NAPO_Prochilodus rubrotaeniatus	0	0	0	0	0	0	0	0	0	0	NA	NA	NA	NA
Psectrogaster amazonica	NAPO	Characiformes	NAPO_Psectrogaster amazonica	0	0	0	0	0	0	0	0	0	0	NA	NA	NA	NA
Rhaphiodon vulpinus	NAPO	Characiformes	NAPO_Rhaphiodon vulpinus	0	0	0	0	0	0	0	0	0	0	NA	NA	NA	NA
Roeboides myersii	NAPO	Characiformes	NAPO_Roeboides myersii	0	0	0	0	0	0	0	0	0	0	NA	NA	NA	NA
Schizodon borellii	NAPO	Characiformes	NAPO_Schizodon borellii	0	0	0	0	0	0	0	0	0	0	NA	NA	NA	NA
Schizodon fasciatus	NAPO	Characiformes	NAPO_Schizodon fasciatus	6	0	288	0	0.000149035	0	0.00127527	0	0	0	NA	NA	NA	NA
Schizodon intermedius	NAPO	Characiformes	NAPO_Schizodon intermedius	0	0	0	0	0	0	0	0	0	0	NA	NA	NA	NA
Schizodon scotorhabdotus	NAPO	Characiformes	NAPO_Schizodon scotorhabdotus	0	0	0	0	0	0	0	0	0	0	NA	NA	NA	NA
Schizodon vittatus	NAPO	Characiformes	NAPO_Schizodon vittatus	0	0	0	0	0	0	0	0	0	0	NA	NA	NA	NA
Semaprochilodus insignis	NAPO	Characiformes	NAPO_Semaprochilodus insignis	0	0	0	0	0	0	0	0	0	0	NA	NA	NA	NA
Semaprochilodus kneri	NAPO	Characiformes	NAPO_Semaprochilodus kneri	0	0	0	0	0	0	0	0	0	0	NA	NA	NA	NA
Semaprochilodus taeniurus	NAPO	Characiformes	NAPO_Semaprochilodus taeniurus	0	0	0	0	0	0	0	0	0	0	NA	NA	NA	NA
Tetragonopterus argenteus	NAPO	Characiformes	NAPO_Tetragonopterus argenteus	0	0	0	0	0	0	0	0	0	0	NA	NA	NA	NA
Triportheus angulatus	NAPO	Characiformes	NAPO_Triportheus angulatus	36	0	467	0	0.00089421	0	0.00206788	0	0	0	NA	NA	NA	NA
Triportheus elongatus	NAPO	Characiformes	NAPO_Triportheus elongatus	0	0	0	0	0	0	0	0	0	0	NA	NA	NA	NA
Triportheus nematurus	NAPO	Characiformes	NAPO_Triportheus nematurus	0	0	1	0	0	0	4.42801e-06	0	0	0	NA	NA	NA	NA
Danio rerio	NAPO	Cypriniform	NAPO_Danio rerio	0	0	1	0	0	0	4.42801e-06	0	0	0	NA	NA	NA	NA
Plagioscion auratus	NAPO	Perciform	NAPO_Plagioscion auratus	0	0	0	0	0	0	0	0	0	0	NA	NA	NA	NA
Plagioscion squamosissimus	NAPO	Perciform	NAPO_Plagioscion squamosissimus	0	0	0	0	0	0	0	0	0	0	NA	NA	NA	NA
Bergiaria westermanni	NAPO	Siluriformes	NAPO_Bergiaria westermanni	0	0	1	0	0	0	4.42801e-06	0	0	0	NA	NA	NA	NA
Brachyplatystoma capapretum	NAPO	Siluriformes	NAPO_Brachyplatystoma capapretum	0	0	15	0	0	0	6.64202e-05	0	0	0	NA	NA	NA	NA
Brachyplatystoma filamentosum	NAPO	Siluriformes	NAPO_Brachyplatystoma filamentosum	587	54	16317	120	0.0145806	0.0120751	0.0722519	0.0347927	9	0.0882353	0.0145806	0.0120751	0.0722519	0.0347927
Brachyplatystoma rousseauxii	NAPO	Siluriformes	NAPO_Brachyplatystoma rousseauxii	0	0	10	0	0	0	4.42801e-05	0	0	0	NA	NA	NA	NA
Brachyplatystoma vaillantii	NAPO	Siluriformes	NAPO_Brachyplatystoma vaillantii	12639	1937	86842	1665	0.313942	0.43314	0.384537	0.482749	44	0.431373	0.313942	0.43314	0.384537	0.482749
Calophysus macropterus	NAPO	Siluriformes	NAPO_Calophysus macropterus	295	169	0	0	0.00732755	0.0377907	0	0	0	0	NA	0.0377907	NA	NA
Cetopsis candiru	NAPO	Siluriformes	NAPO_Cetopsis candiru	0	0	0	0	0	0	0	0	0	0	NA	NA	NA	NA
Cetopsis coecutiens	NAPO	Siluriformes	NAPO_Cetopsis coecutiens	0	0	0	0	0	0	0	0	0	0	NA	NA	NA	NA
Hypophthalmus sp. CGD-2016	NAPO	Siluriformes	NAPO_Hypophthalmus sp. CGD-2016	728	73	5238	111	0.0180829	0.0163238	0.0231939	0.0321832	3	0.0294118	0.0180829	0.0163238	0.0231939	0.0321832
Hypophthalmus spA-289	NAPO	Siluriformes	NAPO_Hypophthalmus spA-289	32	5	0	0	0.000794853	0.00111807	0	0	0	0	NA	NA	NA	NA
Hypophthalmus sp-C95	NAPO	Siluriformes	NAPO_Hypophthalmus sp-C95	179	8	3990	54	0.00444621	0.00178891	0.0176678	0.0156567	1	0.00980392	0	0	0.0176678	0.0156567
Leiarius marmoratus	NAPO	Siluriformes	NAPO_Leiarius marmoratus	0	0	2822	11	0	0	0.0124958	0.00318933	1	0.00980392	0	0	0.0124958	0
Phractocephalus hemioliopterus	NAPO	Siluriformes	NAPO_Phractocephalus hemioliopterus	0	0	0	0	0	0	0	0	0	0	NA	NA	NA	NA
Pimelodina flavipinnis	NAPO	Siluriformes	NAPO_Pimelodina flavipinnis	3565	74	24669	158	0.0885516	0.0165474	0.109235	0.0458104	3	0.0294118	0.0885516	0.0165474	0.109235	0.0458104
Pimelodus A-C34	NAPO	Siluriformes	NAPO_Pimelodus A-C34	2107	80	9914	87	0.0523361	0.0178891	0.0438993	0.0252247	7	0.0686275	0.0523361	0.0178891	0.0438993	0.0252247
Pimelodus albicans	NAPO	Siluriformes	NAPO_Pimelodus albicans	6	0	2	0	0.000149035	0	8.85602e-06	0	0	0	NA	NA	NA	NA
Pimelodus blochii	NAPO	Siluriformes	NAPO_Pimelodus blochii	17891	1171	65951	861	0.444398	0.261852	0.292032	0.249638	29	0.284314	0.444398	0.261852	0.292032	0.249638
Pimelodus cf. argenteus TPL-2014	NAPO	Siluriformes	NAPO_Pimelodus cf. argenteus TPL-2014	459	26	3003	55	0.0114012	0.00581395	0.0132973	0.0159467	2	0.0196078	0.0114012	0	0.0132973	0.0159467
Pimelodus fur	NAPO	Siluriformes	NAPO_Pimelodus fur	3	0	4	0	7.45175e-05	0	1.7712e-05	0	0	0	NA	NA	NA	NA
Pimelodus pohli	NAPO	Siluriformes	NAPO_Pimelodus pohli	25	0	147	0	0.000620979	0	0.000650918	0	0	0	NA	NA	NA	NA
Pimelodus sp. C CGD-2016	NAPO	Siluriformes	NAPO_Pimelodus sp. C CGD-2016	0	0	0	0	0	0	0	0	0	0	NA	NA	NA	NA
Platystomatichthys sturio	NAPO	Siluriformes	NAPO_Platystomatichthys sturio	0	0	0	0	0	0	0	0	0	0	NA	NA	NA	NA
Pseudoplatystoma corruscans	NAPO	Siluriformes	NAPO_Pseudoplatystoma corruscans	1	0	6	0	2.48392e-05	0	2.65681e-05	0	0	0	NA	NA	NA	NA
Pseudoplatystoma fasciatum	NAPO	Siluriformes	NAPO_Pseudoplatystoma fasciatum	142	172	79	13	0.00352716	0.0384615	0.000349813	0.00376921	0	0	NA	0.0384615	NA	NA
Pseudoplatystoma punctifer	NAPO	Siluriformes	NAPO_Pseudoplatystoma punctifer	46	4	18	0	0.0011426	0.000894454	7.97042e-05	0	0	0	NA	NA	NA	NA
Pseudoplatystoma reticulatum	NAPO	Siluriformes	NAPO_Pseudoplatystoma reticulatum	2	0	0	0	4.96783e-05	0	0	0	0	0	NA	NA	NA	NA
Pseudoplatystoma tigrinum	NAPO	Siluriformes	NAPO_Pseudoplatystoma tigrinum	1122	688	4721	285	0.0278695	0.153846	0.0209046	0.0826326	2	0.0196078	0.0278695	0.153846	0.0209046	0.0826326
Pseudostegophilus nemurus	NAPO	Siluriformes	NAPO_Pseudostegophilus nemurus	0	0	0	0	0	0	0	0	0	0	NA	NA	NA	NA
Pterodoras granulosus	NAPO	Siluriformes	NAPO_Pterodoras granulosus	280	11	0	0	0.00695497	0.00245975	0	0	0	0	NA	NA	NA	NA
Sorubim lima	NAPO	Siluriformes	NAPO_Sorubim lima	0	0	0	0	0	0	0	0	0	0	NA	NA	NA	NA
Zungaro jahu	NAPO	Siluriformes	NAPO_Zungaro jahu	0	0	52	1	0	0	0.000230257	0.000289939	0	0	NA	NA	NA	NA
Zungaro zungaro	NAPO	Siluriformes	NAPO_Zungaro zungaro	0	0	1000	28	0	0	0.00442801	0.0081183	1	0.00980392	0	0	0.00442801	0.0081183
Piaractus	MARANON	Characiformes	MARANON_Piaractus	0	16673	39	14478	23	0	0.136612	0.0152821	0.0643713	0.00981229		13.6612	1.52821	6.43713	0.981229	13.6612	1.52821	6.43713	0.981229	0	0
Piaractus brachypomus	MARANON	Characiformes	MARANON_Piaractus brachypomus	0	602	0	308	0	0	0.00493257	0	0.00136941	0		0.493257	0	0.136941	0	NA	NA	0.136941	NA	0	0
Piaractus mesopotamicus	MARANON	Characiformes	MARANON_Piaractus mesopotamicus	18	457	0	540	1	0.0681818	0.00374449	0	0.00240092	0.000426621		0.374449	0	0.240092	0.0426621	NA	NA	0.240092	NA	6.81818	6.81818
Piaractus	NAPO	Characiformes	NAPO_Piaractus	0	1	0	0	0	0	2.48392e-05	0	0	0		0.00248392	0	0	0	NA	NA	NA	NA	0	0
Piaractus brachypomus	NAPO	Characiformes	NAPO_Piaractus brachypomus	0	0	0	0	0	0	0	0	0	0		0	0	0	0	NA	NA	NA	NA	0	0
Piaractus mesopotamicus	NAPO	Characiformes	NAPO_Piaractus mesopotamicus	0	0	0	0	0	0	0	0	0	0		0	0	0	0	NA	NA	NA	NA	0	0
